# Supplementary material for: ﻿An updated checklist of Mozambique’s vascular plants
Source: PhytoKeys. 2022 Jan 28;189:61–80. doi: 10.3897/phytokeys.189.75321 (PMC8816833; doi:10.3897/phytokeys.189.75321)
Supplement: Supplementary material 1 — The updated checklist of Mozambique's vascular plants [file phytokeys-189-061-s001.xlsx]

## Sheet: Checklist (7099 taxa)
Group	Clade	Family	Genus	Taxon Rank	Taxon	Synonyms	Unresolved Names	Life forms category	Growth forms subcategory	Life cycle	CD	NI	NP	T	Z	MC	S	G	I	MP	Endemism	Red List Category	IUCN (Remarks)	Native or Introduced Status	Vernacular Names and Languages	Traditional Uses	Occurrence locations	Data Sources
Angiosperms	Eudicots	Acanthaceae Juss.	Acanthopale	Species	Acanthopale pubescens (Lindau ex Engl.) C.B.Clarke	Acanthopale albosetulosa C.B. Clarke, Acanthopale longipilosa (Mildbr.) Bremek., Dischistocalyx pubescens Engl., Dischistocalyx pubescens var. longipilosa Mildbr.		Herb		Perennial							1							Native			S: Serra Gorongosa (Mt. Nhandore).	Müller et al. (2012), FM, FZ, POWO, TPL, WFO, APD, GBIF, LMA, LMU, BNRH
Angiosperms	Eudicots	Acanthaceae Juss.	Acanthus	Species	Acanthus ueleensis De Wild.	Acanthus montanus sensu C.B. Clarke, Acanthus ueleensis subsp. mahaliensis Napper, Acanthus vandermeirenii De Wild., Acanthus vandermeirenii var. violaceopunctatus De Wild.		Herb		Perennial					1									Native			Z: Mt. Mabu.	FM, FZ, POWO, TPL, WFO, APD, GBIF, LMA, LMU
Angiosperms	Eudicots	Acanthaceae Juss.	Anisotes	Species	Anisotes formosissimus (Klotzsch) Milne-Redh.	Adhatoda formosissima Klotzsch, Macrorungia formosissima (Klotzsch) C.B. Clarke, Symplectochilus formosissimus (Klotzsch) Lindau		Shrub						1			1	1	1	1				Native	Nhamapere (T)		S: Inhamitanga, GNP, Planícies Urema, Maringuè à Serra Gorongosa. T: Wiriamo (próx. do R. Cassenje). G: Chibuto, Mapai à Pafúri, Margens do R. Limpopo. I: Inhassoro. MP: Magude.	FM, FZ, POWO, TPL, WFO, APD, GBIF, LMA, LMU, Koning (1993), BNRH, Burrows et al. (2018)
Angiosperms	Eudicots	Acanthaceae Juss.	Anisotes	Species	Anisotes longistrobus (C.B. Clarke) Vollesen	Macrorungia longistrobus C.B. Clarke, Metarungia longistrobus (C.B. Clarke) Baden		Shrub												1				Native			MP: Mts Libombos.	FM, FZ, POWO, TPL, WFO, APD, Burrows et al. (2018), K
Angiosperms	Eudicots	Acanthaceae Juss.	Anisotes	Species	Anisotes pubinervius (T. Anderson) Heine	Diapedium pubinervium (T.Anderson) Kuntze, Himantochilus marginatus Lindau, Himantochilus pubinervius (T.Anders.) Lindau, Macrorungia pubinervia (T. Anderson) C.B. Clarke, Metarungia pubinervia (T. Anderson) C. Baden, Rungia pubinervia T. Anderson		Shrub							1		1	1						Native			S: Catapú, Inhamitanga à Chupanga. Z: Mt. Namuli, Mt. Mucocha. G: Floresta Sagrada de Chirindzene.	TPL, WFO, POWO, GBIF, Timberlake et al. (2009), FZ, FM, LMA, BNRH, Burrows et al. (2018)
Angiosperms	Eudicots	Acanthaceae Juss.	Anisotes	Species	Anisotes rogersii S.Moore			Shrub										1						Native			G: Chicualacuala.	TPL, APD, POWO, GBIF, Burrows et al. (2018)
Angiosperms	Eudicots	Acanthaceae Juss.	Anisotes	Species	Anisotes sessiliflorus (T.Anderson) C.B.Clarke	Anisotus sessiliflorus subsp. iringensis Baden, Himantochilus sessiliflorus T.Anderson ex Benth. & Hook.f., Himantochilus sessilifolius Lindau		Shrub									1							Native			S: Nhambita, Gwasha, Catapú, Mt. Bunga, GNP.	FZ, POWO, TPL, WFO, APD, GBIF, LMA, LMU, BNRH
Angiosperms	Eudicots	Acanthaceae Juss.	Asystasia	Subspecies	Asystasia gangetica (L.) T.Anderson subsp. micrantha (Nees) Ensermu	Asystasia acuminata Klotzsch, Asystasia ansellioides var. lanceolata Fiori, Asystasia coromandeliana Nees, Asystasia coromandeliana var. micrantha Nees, Asystasia floribunda Klotzsch, Asystasia multiflora Klotzsch, Asystasia parvula C.B. Clarke, Asystasia podostachys Klotzsch, Asystasia pubescens Klotzsch, Asystasia quarterna Nees, Asystasia querimbensis Klotzsch, Asystasia scabrida Klotzsch, Asy…		Herb		Perennial	1		1		1	1	1	1	1	1				Native			CD: Costa da Baía de Pemba. NP: Novas Chaves. Z: Mt. Namuli. S: Cascata de Morumbodzi, Mt. Bunga. MC: Serra Mocuta, Serra Espungabera, Dombe. I: Vilanculos, Cidade de Inhambane. G: Chókwè, Nwachicoluane. MP: Matutuíne, I. Inhaca, Praia de Ponta de Ouro, R. Sábiè, Manhiça, Macaneta, Ricatla, I. Incanine, Ponta Malongane.	FM, FZ, APD, GBIF, LMA, LMU, Wursten et al. (2017), Timberlake et al. (2009)
Angiosperms	Eudicots	Acanthaceae Juss.	Asystasia	Species	Asystasia glandulosa Lindau			Herb		Perennial		1												Native			NI: Marrupa.	FM, FZ, TPL, WFO, POWO, APD, JSTOR, GBIF, LMA
Angiosperms	Eudicots	Acanthaceae Juss.	Asystasia	Species	Asystasia malawiana Brummitt & Chisumpa			Herb		Perennial					1									Native			Z: Mt. Mabu, Mt. Namuli.	Timberlake et al. (2009), FM, FZ, POWO, TPL, WFO, APD, GBIF, LMA, LMU, K
Angiosperms	Eudicots	Acanthaceae Juss.	Asystasia	Species	Asystasia mysorensis (Roth) T.Anderson	Adhatoda rostellaria var. humilis Nees, Adhatoda rostrata Hochst. ex Oliv., Asystasia rostrata Solms ex Lindau, Asystasia schimperi T.Anderson, Asystasia schimperi var. grantii C.B.Clarke, Ruellia mysorensis Roth		Herb		Annual										1				Native			MP: Caminhos de Ferro (na Avenida das Estâncias), Polana, I. Incanine.	FM, FZ, POWO, TPL, WFO, APD, GBIF, LMA, LMU
Angiosperms	Eudicots	Acanthaceae Juss.	Asystasia	Species	Asystasia retrocarpa T.J.Edwards			Herb		Perennial								1		1				Native			MP: Boane, Moamba. G: Licilo, Chissano.	TPL, WFO, POWO, FZ, GBIF
Angiosperms	Eudicots	Acanthaceae Juss.	Avicennia	Species	Avicennia marina (Forssk.) Vierh.	Sceura marina Forssk.		Shrub			1	1					1		1	1		LC		Native			CD: Quiterajo (R. Muenze), Baía de Pemba, Palma, Pebane. NI: Mogincual. S: Beira, Marromeu. I: Vilanculos, Maxixe, Inhassoro, I. Bazaruto, Ponta Gengarene. MP: Mangal do Costa do Sol, I. Inhaca, REM, Matutuíne, R. Incomáti.	FM, FZ, POWO, IUCN Red List, TPL, WFO, APD, JSTOR, GBIF, LMA, LMU, BNRH, Burrows et al. (2018), K
Angiosperms	Eudicots	Acanthaceae Juss.	Barleria	Species	Barleria albostellata C.B.Clarke			Shrub						1										Native			T: Barragem de Cahora Bassa.	FM, POWO, TPL, WFO, GBIF, LMA, JSTOR
Angiosperms	Eudicots	Acanthaceae Juss.	Barleria	Species	Barleria ameliae A.Meeuse	Barleria prionitis subsp. ameliae (A.Meeuse) Brummitt & J.R.I.Wood		Shrub						1						1		LC		Native			T: Moatize. MP: Mapulanguene à Macaene.	TPL, IUCN Red List, POWO, FZ, BNRH, POWO
Angiosperms	Eudicots	Acanthaceae Juss.	Barleria	Subspecies	Barleria calophylloides Lindau subsp. pilosa I.Darbysh.			Herb	Unknown			1												Native			NI: Locality not known.	FM, POWO, TPL, APD
Angiosperms	Eudicots	Acanthaceae Juss.	Barleria	Species	Barleria capitata Klotzsch	Barleria megalosiphon Mildbr.		Subshrub						1		1	1					LC		Native			T. MC. S.	FM, POWO, TPL, WFO, APD, IUCN Red List
Angiosperms	Eudicots	Acanthaceae Juss.	Barleria	Species	Barleria crossandriformis C.B.Clarke			Herb		Perennial										1				Native			MP: Boane à Namaacha.	FM, FZ, POWO, TPL, WFO, APD, GBIF, LMA, LMU
Angiosperms	Eudicots	Acanthaceae Juss.	Barleria	Species	Barleria delagoensis Oberm.	Barleria prionitis subsp. delagoensis (Oberm.) Brummitt & J.R.I.Wood		Herb		Perennial	1						1	1	1	1	NE			Native	Cadela (CD,macu)		S: Catapú, Inhaminga, Nhagutua, Cheringoma. I: Funhalouro, Pomene, Inhassoro, I. Bazaruto. G: Chidenguele, Zona Braza. MP: I. Inhaca, REM, Reserva Florestal de Licuáti. CD: Ancuabe, R. Unculo.	GBIF, LMA, TPL, WFO, POWO, FZ, FM, Koning (1993), Darbyshire et al. (2019), BNRH, K
Angiosperms	Eudicots	Acanthaceae Juss.	Barleria	Subspecies	Barleria elegans S.Moore ex C.B.Clarke subsp. orientalis I.Darbysh.			Herb		Perennial										1				Native			MP: Avenida da Marginal (mata próximo do Clube Naval).	FM, FZ, POWO, GBIF
Angiosperms	Eudicots	Acanthaceae Juss.	Barleria	Species	Barleria fissimuroides I.Darbysh.			Shrub								1					NE	EN		Native			MC: Quinta da Fronteira.	FM, FZ, POWO, IUCN Red List, TPL, WFO, APD, JSTOR, GBIF, LMA, LMU, Darbyshire et al. (2019), K
Angiosperms	Eudicots	Acanthaceae Juss.	Barleria	Subspecies	Barleria fulvostellata C.B.Clarke subsp. mangochiensis I. Darbysh.			Shrub				1									NE	EN		Native			NI: Mt. Mandimba.	TPL, WFO, POWO, IUCN Red List, GBFI, LMU, K, Darbyshire et al. (2019)
Angiosperms	Eudicots	Acanthaceae Juss.	Barleria	Species	Barleria gueinzii Sond.			Shrub												1				Native			MP: Mt. M'Ponduíne, Cascatas da Namaacha.	POWO, GBIF
Angiosperms	Eudicots	Acanthaceae Juss.	Barleria	Species	Barleria heterotricha Lindau			Shrub												1				Native			MP: Ressano Garcia.	FM, JSTOR, POWO, TPL, WFO, APD, GBIF
Angiosperms	Eudicots	Acanthaceae Juss.	Barleria	Species	Barleria hirta Oberm.			Herb		Perennial						1	1			1				Native			S. MC. MP.	FM, POWO, TPL, WFO, APD
Angiosperms	Eudicots	Acanthaceae Juss.	Barleria	Species	Barleria holstii Lindau			Herb		Perennial		1															NI: Txitonga.	POWO, FZ
Angiosperms	Eudicots	Acanthaceae Juss.	Barleria	Species	Barleria laceratiflora Lindau			Herb		Perennial			1								NE	EN		Native			NP: I. Goa.	POWO, IUCN Red List, GBIF, LMA, Darbyshire et al. (2019), K
Angiosperms	Eudicots	Acanthaceae Juss.	Barleria	Species	Barleria lancifolia T.Anderson	Barleria alata S.Moore, Barleria cinereicaulis C.B.Clarke, Barleria exellii Benoist, Barleria gossweileri S.Moore, Barleria hereroensis Engl., Barleria latiloba Engl., Barleria rautanenii Schinz		Herb		Perennial								1	1					Native			I. G.	FM, POWO, TPL, WFO, APD
Angiosperms	Eudicots	Acanthaceae Juss.	Barleria	Species	Barleria lugardii C.B.Clarke	Barleria breyeri Oberm., Barleria quadriloba Oberm.		Shrub										1						Native			G: Chicualacuala.	FZ, POWO, TPL, WFO, APD, GBIF, LMA, LMU
Angiosperms	Eudicots	Acanthaceae Juss.	Barleria	Species	Barleria matopensis S.Moore			Shrub								1								Native			MC: Maringa.	FZ, POWO, TPL, WFO, APD, GBIF, LMA, LMU
Angiosperms	Eudicots	Acanthaceae Juss.	Barleria	Species	Barleria mutabilis I.Darbysh.	Barleria fulvostellata subsp. scariosa I.Darbysh.		Shrub				1												Native			NI: Niassa.	FM, FZ, POWO, TPL, WFO, APD, GBIF, LMA, LMU
Angiosperms	Eudicots	Acanthaceae Juss.	Barleria	Species	Barleria nyasensis C.B. Clarke			Herb		Perennial		1										LC		Native			NI: Locality not known.	FM, POWO, TPL, APD, IUCN Red List
Angiosperms	Eudicots	Acanthaceae Juss.	Barleria	Species	Barleria obtusa Nees	Barleria uitenagensis Hochst. ex Nees		Herb		Perennial										1				Native			MP: Mts Libombos.	FM, FZ, POWO, TPL, WFO, APD, GBIF, LMA, LMU
Angiosperms	Eudicots	Acanthaceae Juss.	Barleria	Species	Barleria oxyphylla Lindau			Herb		Perennial										1	NE	VU		Native			MP: R. Incomáti, Sábiè.	TPL, WFO, POWO, IUCN Red List, FM, FZ, GBIF, Darbyshire et al. (2019), K
Angiosperms	Eudicots	Acanthaceae Juss.	Barleria	Species	Barleria repens Nees	Barleria querimbensis Klotzsch, Barleria swynnertonii S. Moore		Shrub			1						1	1	1	1				Native			CD: I. Vamizi. G: Bilene, Parque Flores. MP: I. Portugueses, Marracuene. I: Ponta Závora, Vilanculos. S: Cheringoma, GNP.	TPL, WFO, POWO, FZ, LMA, GBIF, BNRH, K
Angiosperms	Eudicots	Acanthaceae Juss.	Barleria	Species	Barleria rhynchocarpa Klotzsch	Barleria sacleuxii Benoist, Crossandra rhynchocarpa (Klotzsch) Cufod.		Herb		Perennial	1											VU		Native			CD: Ilha do Ibo.	TPL, WFO, POWO, IUCN Red List, GBIF, LMA, K
Angiosperms	Eudicots	Acanthaceae Juss.	Barleria	Species	Barleria saxatilis Oberm.			Shrub										1	1					Native			I. G.	TPL, WFO, POWO, GBIF, FM
Angiosperms	Eudicots	Acanthaceae Juss.	Barleria	Species	Barleria senensis Klotzsch	Barleria albida Lindau, Barleria eenii S. Moore, Barleria petrophila Lindau, Barleria spathulata N.E. Br.		Herb		Perennial				1								LC		Native			T: ao km 148 do Caminho de Ferro.	TPL, WFO, POWO, IUCN Red List, GBIF, FZ, FM
Angiosperms	Eudicots	Acanthaceae Juss.	Barleria	Species	Barleria setosa (Klotzsch) I.Darbysh.	Barleria prionitis var. setosa Klotzsch		Herb		Perennial			1								E	EN		Native			NP: I. Goa, I. Moçambique, Cabeceira Pequena.	Darbyshire et al. (2019), POWO, IUCN Red List, TPL, WFO, APD, K
Angiosperms	Eudicots	Acanthaceae Juss.	Barleria	Subspecies	Barleria spinulosa Klotzsch subsp. kirkii (T.Anderson) I.Darbysh.	Barleria kirkii T.Anderson, Barleria lateralis Oberm., Barleria variabilis Oberm.		Herb	Unknown				1	1		1	1							Native			T: Cascatas da Cahora Bassa. S: Inhamitanga e Inhaminga. NP: Hospital Psiquiátrico. MC: Dombe, Catandica.	FM, FZ, POWO, TPL, WFO, GBIF
Angiosperms	Eudicots	Acanthaceae Juss.	Barleria	Subspecies	Barleria spinulosa Klotzsch subsp. spinulosa	Barleria clivorum C.B.Clarke, Barleria consanguinea Klotzsch, Barleria squarrosa Klotzsch		Herb		Perennial	1	1	1	1		1	1		1					Native			CD: Hunters' concession, Nhica do Rovuma, Mueda. NI: REN, R. Metapiri. T: Barragem de Cahora Bassa, R. Mucangádzi. NP: Murrupula, Memba à Nacala. S: GNP, Chupanga, Catapú, Muanza, Inhamintanga à Inhaminga. MC: R. Nhamadzi, Mts Chimanimani, Mt. Chinhaunguri, Reserva Florestal de Moribane. I: Massinga à Vilanculos.	FM, FZ, POWO, APD, GBIF, LMA, LMU, BNRH, K
Angiosperms	Eudicots	Acanthaceae Juss.	Barleria	Subspecies	Barleria taitensis S.Moore subsp. rogersii (S.Moore) I.Darbysh.	Barleria rogersii S.Moore		Shrub										1	1					Native			I. G.	FM, POWO, TPL, WFO, APD
Angiosperms	Eudicots	Acanthaceae Juss.	Barleria	Species	Barleria tanzaniana (Brummitt & J.R.I. Wood) I. Darbysh.	Barleria prionitis subsp. tanzaniana Brummitt & J.R.I.Wood		Subshrub																Native			Northern Mozambique.	FM, POWO, APD
Angiosperms	Eudicots	Acanthaceae Juss.	Barleria	Species	Barleria torrei I. Darbysh.			Shrub				1									E	EN		Native			NI: Mt. Jéci, Maniamba, Unango.	Darbyshire et al. (2019), IUCN Red List, GBIF, APD, JSTOR, LMA, K
Angiosperms	Eudicots	Acanthaceae Juss.	Barleria	Species	Barleria ventricosa Hochst. ex Nees	Barleria angustiloba Lindau, Barleria bagshawei S.Moore, Barleria grantii Oliv., Barleria keniensis Mildbr., Barleria micrantha C.B.Clarke, Barleria mollis R.Br., Barleria scindens Oberm., Barleria stuhlmannii Lindau, Barleria stuhlmannii var. obtusata Mildbr., Barleria vix-dentata C.B.Clarke		Herb		Perennial						1								Native			MC: Mt. Binga perto do R. Nhamadzi, Mupandeia à Tsetsera.	FM, FZ, POWO, TPL, WFO, APD, GBIF, LMA, LMU
Angiosperms	Eudicots	Acanthaceae Juss.	Barleria	Species	Barleria vollesenii I.Darbysh.			Herb		Perennial		1									NE	EN		Native			NI: Mademo (Marrupa à Mukwajaja)	Darbyshire et al. (2019), POWO, IUCN Red List, TPL, K
Angiosperms	Eudicots	Acanthaceae Juss.	Barleria	Species	Barleria whytei S.Moore			Herb		Perennial	1											EN		Native			CD: I. Vamizi.	FM, FZ, POWO, IUCN Red List, TPL, WFO, APD, JSTOR, GBIF, LMA, LMU, BNRH, K
Angiosperms	Eudicots	Acanthaceae Juss.	Blepharis	Species	Blepharis acanthodioides Klotzsch	Blepharis myresii Oberm.		Herb		Perennial							1	1	1	1				Native	Ka-Paia (T)		G: Canhissane à Mabuiapanse, Vale do R. Limpopo, Bilene. MP: Magude, R. Sicani (Guenhana), Manhiça, Sábiè à Magude. I: Pambarra, Vilanculos. S: Lago Urema à Inhaminga.	FM, FZ, POWO, TPL, WFO, APD, GBIF, LMA, LMU, Koning (1993)
Angiosperms	Eudicots	Acanthaceae Juss.	Blepharis	Species	Blepharis affinis Lindau	Blepharis hirsuta Mildbr.		Herb		Perennial	1	1	1		1									Native			NI: REN, R. Metapiri, Litunde, Majune, Missaúze, Maniamba à Sanga, Massangulo, R. Luculumezi, Cuamba à Mandimba. CD: Pemba à Montepuez. NP: Entrada à Nacala Velha, Murrupula. Z: Lioma à Mutuáli.	TPL, WFO, POWO, GBIF, FM, FZ, BNRH, K
Angiosperms	Eudicots	Acanthaceae Juss.	Blepharis	Species	Blepharis bainesii S. Moore ex C.B. Clarke	Blepharis cataractae S. Moore		Herb		Annual				1										Native			T: Locality not known.	FM, POWO, TPL, APD
Angiosperms	Eudicots	Acanthaceae Juss.	Blepharis	Species	Blepharis buchneri Lindau	Blepharis buchneri var. major De Wild., Blepharis malangensis S. Moore		Herb		Perennial	1													Native	Natika (NI)		CD: Montepuez à Mapupulo.	FM, FZ, POWO, TPL, WFO, APD, GBIF, LMA, LMU
Angiosperms	Eudicots	Acanthaceae Juss.	Blepharis	Species	Blepharis diversispina (Nees) C.B.Clarke	Acanthodium diversispinum Nees, Blepharis grisea S.Moore		Herb		Perennial								1						Native	Nchachacha Wa Mananga (G,tson)	Medicine	G: Barragem de Massingir à Mapulanguene, LNP.	FM, FZ, POWO, TPL, WFO, APD, GBIF, LMA, LMU, Koning (1993)
Angiosperms	Eudicots	Acanthaceae Juss.	Blepharis	Species	Blepharis dunensis Vollesen			Herb		Perennial			1		1						E	EN		Native			NP: Angoche, Quinga. Z: Pebane.	POWO, IUCN Red List, TPL, WFO, FM, FZ, JSTOR, GBIF, LMA, Darbyshire et al. (2019), K
Angiosperms	Eudicots	Acanthaceae Juss.	Blepharis	Species	Blepharis gazensis Vollesen			Herb		Perennial							1	1			E	LC		Native			S: Machanga, R. Muari à R. Save. G: Mabalane à Mabuiapanse.	TPL, WFO, POWO, IUCN Red List, GBIF, FM, FZ, LMA, Darbyshire et al. (2019), K
Angiosperms	Eudicots	Acanthaceae Juss.	Blepharis	Species	Blepharis grandis C.B. Clarke	Blepharis carduacea Lindau, Blepharis frutescens Gilli		Herb		Perennial		1		1										Native			NI: Lichinga. T: Domué à Chia.	FM, FZ, POWO, TPL, WFO, APD, GBIF, LMA, LMU
Angiosperms	Eudicots	Acanthaceae Juss.	Blepharis	Variety	Blepharis integrifolia (L.f.) E.Mey. & Drège ex Schinz var. clarkei (Schinz) Oberm.	Blepharis clarkei Schinz		Herb		Perennial										1				Native			MP: Boane - Goba - Namaacha.	TPL, WFO, GBIF, FZ, FM, LMA
Angiosperms	Eudicots	Acanthaceae Juss.	Blepharis	Variety	Blepharis integrifolia (L.f.) E.Mey. & Drège ex Schinz var. integrifolia	Acanthus repens Vahl, Blepharis molluginifolia Pers., Blepharis repens (Vahl) Roth, Blepharis rupicola Engl., Blepharis setosa Nees		Herb		Perennial														Native			Southern Mozambique.	POWO, GBIF, FM
Angiosperms	Eudicots	Acanthaceae Juss.	Blepharis	Species	Blepharis involucrata Solms ex Schweinf.	Blepharis baguirmiensis Lindau, Blepharis pinguior C.B.Clarke		Herb		Annual		1												Native			NI: Locality not known.	FM, POWO, TPL, APD
Angiosperms	Eudicots	Acanthaceae Juss.	Blepharis	Species	Blepharis leendertziae Oberm.			Herb		Annual				1										Native			T: Locality not known.	POWO, TPL, APD
Angiosperms	Eudicots	Acanthaceae Juss.	Blepharis	Species	Blepharis maderaspatensis (L.) Roth	Acanthus ciliaris Burm.f., Acanthus maderaspatensis L., Blepharis abyssinica Hochst. ex A.Rich., Blepharis boerhaviifolia Pers., Blepharis breviciliata Fiori, Blepharis calaminthifolia Pers., Blepharis gueinzi T.Anderson, Blepharis procumbens B.Heyne ex Roth, Blepharis procurrens Nees, Blepharis rubiifolia Schumach., Blepharis teaguei Oberm., Blepharis togodelia Solms ex Schweinf.		Herb		Perennial				1		1	1		1	1				Native			T: Barragem de Cahora Bassa. MC: R. Nhamadzi, Mts Chimanimani. S: R. Vunduzi, Mt. Bunga, à NW do GNP. I: Vilanculos. MP: Lumadi (Matutuíne), Moamba à Umbelúzi.	POWO, TPL, APD, BNRH, FM
Angiosperms	Eudicots	Acanthaceae Juss.	Blepharis	Species	Blepharis obermeyerae Vollesen			Herb		Perennial								1		1				Native			G: Massingir (Lagoa Nova). MP: Boane (Mafuta), Namaacha (Gulene), Moamba (Glaze).	FM, FZ, POWO, TPL, WFO, GBIF, LMA, K
Angiosperms	Eudicots	Acanthaceae Juss.	Blepharis	Species	Blepharis pungens Klotzsch	Blepharis madandensis S.Moore		Herb		Perennial				1		1								Native	Cossô (T)		T: Wiriamo, R. Cassendje, Boroma - Tete, Chicoa. MC: Mossurize.	FM, FZ, POWO, TPL, WFO, APD, GBIF, LMA, LMU, Koning (1993)
Angiosperms	Eudicots	Acanthaceae Juss.	Blepharis	Species	Blepharis subvolubilis C.B.Clarke	Blepharis saxatilis Oberm.		Shrub										1						Native			G: Barragem de Massingir.	APD, POWO, GBIF
Angiosperms	Eudicots	Acanthaceae Juss.	Blepharis	Species	Blepharis swaziensis Vollesen			Herb		Perennial										1	NE			Native			MP: Matianine (Namaacha).	FM, FZ, POWO, TPL, WFO, APD, GBIF, LMA, LMU, Darbyshire et al. (2019), K
Angiosperms	Eudicots	Acanthaceae Juss.	Blepharis	Species	Blepharis tenuiramea S.Moore	Blepharis caloneura S.Moore, Blepharis caloneura var. angustifolia Oberm.		Herb		Annual		1	1											Native			NP: Ribáuè, Namina. NI: Bacia do R. Lugenda.	FM, FZ, POWO, TPL, WFO, APD, GBIF, LMA, LMU
Angiosperms	Eudicots	Acanthaceae Juss.	Blepharis	Species	Blepharis torrei Vollesen			Herb		Perennial		1									NE	DD		Native			NI: Lichinga.	FM, FZ, POWO, IUCN Red List, TPL, WFO, APD, JSTOR, GBIF, LMA, Darbyshire et al. (2019), K
Angiosperms	Eudicots	Acanthaceae Juss.	Brachystephanus	Species	Brachystephanus africanus S.Moore.			Herb		Perennial					1		1							Native		Beliefs	Z: Mt. Mabu, Mt. Namuli. S: Serra Gorongosa (Mt. Nhandore), GNP.	Müller et al. (2012), Timberlake et al. (2009), FM, FZ, POWO, TPL, WFO, APD, GBIF, LMA, K
Angiosperms	Eudicots	Acanthaceae Juss.	Brillantaisia	Species	Brillantaisia cicatricosa Lindau	Brillantaisia grandidentata S.Moore, Brillantaisia kirungae Lindau, Brillantaisia subulugurica Burkill, Brillantaisia ulugurica Lindau		Shrub							1	1								Native			Z: Mt. Mabu, Mt. Namuli, Serra Gúruè. MC: Reserva Florestal de Moribane.	TPL, WFO, Müller et al. (2012), POWO, GBIF, FZ, FM, LMA, Wursten et al. (2017)
Angiosperms	Eudicots	Acanthaceae Juss.	Brillantaisia	Species	Brillantaisia pubescens T.Anderson ex Oliv.	Brillantaisia anomala Lindau, Brillantaisia rutenbergiana Vatke, Hygrophila pubescens (T.Anderson ex Oliv.) Benoist, Ruelliola grevei Baill.		Herb		Annual							1							Native			S: GNP.	FM, FZ, POWO, TPL, WFO, APD, GBIF, LMA, LMU
Angiosperms	Eudicots	Acanthaceae Juss.	Brillantaisia	Species	Brillantaisia riparia (Vollesen & Brummitt) Sidwell	Brillantaisia oligantha Milne-Redh., Brillantaisia pubescens var. riparia Vollesen & Brummitt		Herb		Annual	1	1	1											Native			NI: Lugenda, Maniamba, Sanga. NP: Murrupula, Malema à Mutuáli. CD: Chiúre à Meloco.	FM, POWO, TPL, WFO, GBIF, LMA, JSTOR, K
Angiosperms	Eudicots	Acanthaceae Juss.	Cephalophis	Species	Cephalophis lukei Vollesen			Herb		Perennial							1				NE	EN		Native			S: Floresta Inhamitanga, Serra Xiluvo.	TPL, WFO, GBIF, IUCN Red List, LMA, Darbyshire et al. (2019), FZ, K
Angiosperms	Eudicots	Acanthaceae Juss.	Crabbea	Species	Crabbea hirsuta Harv.	Crabbea cirsioides (Nees) Nees, Crabbea robusta N.E.Br.		Herb		Perennial										1				Native			MP: Matianine (Namaacha).	FM, FZ, POWO, TPL, WFO, APD, GBIF, LMA, LMU
Angiosperms	Eudicots	Acanthaceae Juss.	Crabbea	Species	Crabbea nana Nees	Crabbea pedunculata N.E.Br.	Ruellia cirsioides Nees, Ruellia nana Nees	Herb		Perennial						1								Native			MC: Espungabera.	TPL, WFO, POWO
Angiosperms	Eudicots	Acanthaceae Juss.	Crabbea	Species	Crabbea velutina S.Moore	Crabbea reticulata C.B.Clarke		Herb		Perennial				1		1	1		1					Native	Cacachuane (I,tswa)		T: Cahora Bassa, Mágoè. MC: Espungabera. S: Coutada 12, Cheringoma. I: Govuro.	GBIF, LMA, FM, TPL, WFO, POWO, Koning (1993)
Angiosperms	Eudicots	Acanthaceae Juss.	Crossandra	Species	Crossandra fruticulosa Lindau	Crossandra zuluensis W.T.Vos & T.J.Edwards		Shrub												1				Native			MP: Boane, Namaacha, Moamba, Matutuíne.	GBIF, FM, TPL, WFO, POWO, K
Angiosperms	Eudicots	Acanthaceae Juss.	Crossandra	Species	Crossandra greenstockii S.Moore			Herb		Perennial										1				Native			MP: Namaacha.	FM, FZ, POWO, TPL, WFO, APD, GBIF, LMA, LMU, K
Angiosperms	Eudicots	Acanthaceae Juss.	Crossandra	Species	Crossandra mucronata Lindau			Herb		Perennial								1						Native			G: Massingir.	FM, FZ, POWO, TPL, WFO, APD, GBIF, LMA, LMU
Angiosperms	Eudicots	Acanthaceae Juss.	Crossandra	Species	Crossandra puberula Klotzsch	Crossandra jashi Lindau, Crossandra pubescens Klotzsch		Herb		Perennial			1		1	1	1							Native			MC: Tsetsera, Bandula, Serra Chibata. S: R. Vandúzi, Serra Xiluvo, Coutada 12, Cheringoma, Mt. Bunga, GNP. Z: Mocuba, Milange, Ile, Maganja da Costa à Mocubela, Namagoa, Monapo. NP: Muecate à Imala, Cidade de Nampula.	FM, FZ, POWO, TPL, WFO, APD, GBIF, LMA, LMU, BNRH, K
Angiosperms	Eudicots	Acanthaceae Juss.	Crossandra	Species	Crossandra pyrophila Vollesen			Herb		Perennial					1									Native			Z: Serra Chiperone.	Timberlake et al. (2009), FM, FZ, POWO, TPL, WFO, GBIF, K
Angiosperms	Eudicots	Acanthaceae Juss.	Dicliptera	Species	Dicliptera aculeata C.B. Clarke	Peristrophe aculeata (C.B.Clarke) Brummitt		Herb		Perennial		1												Native			NI: Lichinga.	FM, FZ, POWO, TPL, WFO, APD, GBIF, LMA, LMU, K
Angiosperms	Eudicots	Acanthaceae Juss.	Dicliptera	Species	Dicliptera capitata Milne-Redh.			Herb		Annual		1												Native			NI: Locality not known.	FM, POWO, TPL, APD
Angiosperms	Eudicots	Acanthaceae Juss.	Dicliptera	Subspecies	Dicliptera carvalhoi Lindau subsp. carvalhoi	Dicliptera angustifolia Gilli, Dicliptera cephalantha S.Moore, Dicliptera olitoria Mildbr., Dicliptera rogersii Turrill		Herb		Annual		1				1								Native			NI: Maniamba. MC: Mts Chimanimani.	FM, FZ, POWO, TPL, WFO, APD, GBIF, LMA, LMU, BNRH
Angiosperms	Eudicots	Acanthaceae Juss.	Dicliptera	Subspecies	Dicliptera carvalhoi Lindau subsp. laxiflora I. Darbysh.			Herb		Annual					1									Native			Z: Locality not known.	FM, POWO, TPL, APD
Angiosperms	Eudicots	Acanthaceae Juss.	Dicliptera	Subspecies	Dicliptera carvalhoi Lindau subsp. nemorum (Milne-Redh.) I. Darbysh.	Dicliptera nemorum Milne-Redh.		Herb		Perennial		1												Native			NI: Locality not known.	FM, POWO, TPL, APD
Angiosperms	Eudicots	Acanthaceae Juss.	Dicliptera	Species	Dicliptera cernua (Hook.f. ex Nees) J.C.Manning & Goldblatt	Justicia acinoides Nees, Justicia capensis Eckl. ex Nees, Peristrophe caulopsila E.Mey. ex Nees, Peristrophe cernua Hook. ex Nees, Peristrophe krebsii C.Presl, Peristrophe natalensis T.Anderson, Peristrophe oblonga Nees		Shrub										1	1					Native			I. G.	FM, POWO, TPL, WFO, APD
Angiosperms	Eudicots	Acanthaceae Juss.	Dicliptera	Species	Dicliptera clinopodia Nees	Justicia clinopodia E. Mey.		Shrub						1	1	1	1			1				Native			T: Ulóngué. Z: Namagoa. MC: Tsetsera. S: Chitengo, Floresta Sangrassa. MP: Matutuíne.	POWO, GBIF, FM, FZ, LMA, Wursten et al. (2017)
Angiosperms	Eudicots	Acanthaceae Juss.	Dicliptera	Species	Dicliptera elliotii C.B.Clarke	Dicliptera insignis Mildbr., Dicliptera microchlamys S.Moore, Dicliptera ripicola Benoist, Dicliptera ripicola R. Benoist, Dicliptera silvicola Lindau, Dicliptera talbotii S.Moore		Herb	Unknown								1	1	1	1		LC	Requiring to add Mozambique in the geographic range	Native			MP: Porto Henrique, I. Inhaca. I: Govuro. G: Caniçado. S: Chitengo, Floresta Sangrassa.	FM, FZ, POWO, IUCN Red List, TPL, WFO, APD, JSTOR, GBIF, LMA, LMU
Angiosperms	Eudicots	Acanthaceae Juss.	Dicliptera	Species	Dicliptera extenta S.Moore	Dicliptera zeylanica Nees		Herb		Perennial							1	1						Native			S. G.	FM, POWO, TPL, WFO, APD
Angiosperms	Eudicots	Acanthaceae Juss.	Dicliptera	Species	Dicliptera heterostegia C.Presl	Diapedium heterostegium (C.Presl) Kuntze, Dicliptera heterostegia var. praetextata Benoist, Dicliptera mossambicensis Klotzsch		Herb		Perennial	1				1			1						Native			CD: I. Vamizi, R. Muacamula, Macomia. Z: Mt. Mabu. G: LNP.	FM, FZ, POWO, TPL, WFO, APD, GBIF, LMA, LMU, BNRH, K
Angiosperms	Eudicots	Acanthaceae Juss.	Dicliptera	Subspecies	Dicliptera maculata Nees subsp. pallidiflora I. Darbysh.			Herb		Perennial		1												Native			NI: Locality not known.	TPL, WFO, POWO, GBIF, FM
Angiosperms	Eudicots	Acanthaceae Juss.	Dicliptera	Species	Dicliptera melleri Rolfe			Herb		Perennial				1										Native			T: Angónia, Macanga.	FM, FZ, POWO, TPL, WFO, APD, GBIF, LMA, LMU
Angiosperms	Eudicots	Acanthaceae Juss.	Dicliptera	Subspecies	Dicliptera minor C.B.Clarke subsp. divaricata (Compton) I.Darbysh.	Dicliptera divaricata Compton, Dicliptera minor subsp. pratis-manna K.Balkwil		Herb		Perennial										1				Native			MP: Ressano Garcia.	FM, POWO, TPL, APD, K, FZ
Angiosperms	Eudicots	Acanthaceae Juss.	Dicliptera	Species	Dicliptera paniculata (Forssk.) I.Darbysh.	Dianthera bicalyculata Retz., Dianthera bifida Moench, Dianthera paniculata Forssk., Dianthera rugosa Perrier ex Nees, Dicliptera bicalyculata (Retz.) Kostel., Dicliptera paniculata var. rivinoides (C.B.Clarke) Karthik. & Moorthy, Dicliptera paniculata var. subaequibracteata (Bennet) Karthik. & Moorthy, Justicia bicalyculata (Retz.) Vahl, Justicia ligulata Lam., Justicia ruderalis Russell ex Steu…		Herb		Annual				1										Native			T: Cahora Bassa, R. Mucangádzi.	FM, FZ, POWO, TPL, WFO, APD, GBIF, LMA, LMU
Angiosperms	Eudicots	Acanthaceae Juss.	Dicliptera	Species	Dicliptera pumila (Lindau) Dandy ex Brenan	Duvernoia pumila Lindau, Peristrophe pumila (Lindau) Lindau		Herb	Unknown			1												Native			NI: Maniamba.	TPL, WFO, POWO, FM, LMA
Angiosperms	Eudicots	Acanthaceae Juss.	Dicliptera	Species	Dicliptera quintasii Lindau	Monechma quintasii Benoist		Herb		Perennial										1	NE	VU		Native			MP: REM, Zitundo, Marracuene, Pessene.	TPL, WFO, POWO, IUCN Red List, GBIF, LMA, Darbyshire et al. (2019), K
Angiosperms	Eudicots	Acanthaceae Juss.	Dicliptera	Species	Dicliptera swynnertonii S.Moore			Herb		Perennial						1	1							Native			S. MC.	FM, POWO, TPL, WFO, APD
Angiosperms	Eudicots	Acanthaceae Juss.	Dicliptera	Species	Dicliptera verticillata (Forssk.) C.Chr.	Adhatoda hyssopifolia Medik., Dianthera verticillata Forssk., Diapedium cuspidatum Kuntze, Diapedium umbellatum (Juss.) Kuntze, Diapedium verticillatum (Forssk.) Kuntze, Dicliptera maculata var. senegambica Nees, Dicliptera micranthes Nees, Dicliptera ocymoides (Lam.) Juss., Dicliptera senegambica (Nees) Benoist, Dicliptera senegambica R. Benoist E, Dicliptera spinulosa Hochst. ex K.Balkwill, Dic…	Hypoestes umbellata F.Dietr., Justicia patula E.Mey. ex Nees	Herb		Annual										1				Native			MP: Namaacha.	FM, FZ, TPL, WFO, POWO, LMA, GBIF
Angiosperms	Eudicots	Acanthaceae Juss.	Duosperma	Species	Duosperma crenatum (Lindau) P.G.Mey.	Disperma crenatum (Lindau) Milne-Redh., Disperma parviflorum C.B.Clarke, Disperma quadrisepalum var. grandifolium S.Moore, Hygrophila crenata Lindau	Hygrophila parviflora Lindau	Herb		Perennial				1										Native			T: Locality not known.	TPL, WFO, POWO, FM, GBIF
Angiosperms	Eudicots	Acanthaceae Juss.	Duosperma	Species	Duosperma dichotomum Vollesen			Herb		Perennial	1										E	VU		Native			CD: Macomia, Mucojo.	TPL, WFO, POWO, IUCN Red List, FM, LMA, GBIF, Darbyshire et al. (2019), K
Angiosperms	Eudicots	Acanthaceae Juss.	Duosperma	Species	Duosperma fimbriatum Brummitt			Herb		Perennial		1												Native			NI: Locality not known.	TPL, WFO, POWO, FM, FZ, GBIF
Angiosperms	Eudicots	Acanthaceae Juss.	Duosperma	Species	Duosperma quadrangulare (Klotzsch) Brummitt	Disperma affine (Lindau) S.Moore, Disperma angolense C.B.Clarke, Disperma dentatum C.B.Clarke, Disperma quadrangulare (Klotzsch) C.B.Clarke, Disperma viscidissimum S.Moore, Duosperma angolense (C.B.Clarke) Brummitt, Dyschoriste affinis (Lindau) S.Moore, Hygrophila affinis Lindau, Nomaphila quadrangularis Klotzsch		Herb		Perennial					1	1	1	1						Native			Z: Boroma. S: GNP, Búzi, Machanga, Chiramba. MC: Báruè. G: Lago Fucue, Xai-Xai à Bilene.	GBIF, FM, TPL, WFO, POWO
Angiosperms	Eudicots	Acanthaceae Juss.	Dyschoriste	Species	Dyschoriste albiflora Lindau			Herb		Perennial				1										Native			T: Mt. Dezenza, Tsangano.	GBIF, LMA, FM, TPL, WFO, POWO
Angiosperms	Eudicots	Acanthaceae Juss.	Dyschoriste	Species	Dyschoriste burchellii (Nees) Kuntze	Calophanes burkei T.Anderson, Chaetacanthus burchellii Nees		Shrub												1							MP: R. Movene.	POWO, APD, GBIF
Angiosperms	Eudicots	Acanthaceae Juss.	Dyschoriste	Species	Dyschoriste hildebrandtii (S.Moore) Lindau ex O.B.Clarke	Calophanes hildebrandtii S.Moore, Dyschoriste alba S.Moore, Dyschoriste fischeri Lindau, Dyschoriste fruticulosa (Rolfe) Chiov., Dyschoriste hildebrandtii (S. Moore) S. Moore, Dyschoriste marandellae Merxm., Dyschoriste matopensis N.E.Br., Dyschoriste mollis (S.Moore) C.B.Clarke, Dyschoriste monroi S.Moore, Dyschoriste nobilior C.B.Clarke, Dyschoriste procumbens E.A.Bruce, Dyschoriste rogersii S.…	Satanocrater fruticulosa (Rolfe) Lindau	Shrub									1			1				Native			S: GNP, Sena. MP: Moamba à Ressano Garcia.	FM, POWO, TPL, WFO, APD, GBIF
Angiosperms	Eudicots	Acanthaceae Juss.	Dyschoriste	Species	Dyschoriste mutica (S.Moore) C.B.Clarke	Calophanes radicans var. mutica S.Moore, Dyschoriste petalidioides S.Moore		Herb		Perennial		1												Native			NI: Locality not known.	FM, POWO, TPL, APD
Angiosperms	Eudicots	Acanthaceae Juss.	Dyschoriste	Species	Dyschoriste nagchana (Nees) Bennet	Calophanes fasciculiflora (Fenzl) Martelli, Calophanes hyssopifolius Nees, Calophanes nagchana (Nees) Nees, Calophanes natalensis T.Anderson, Calophanes perrottetii Nees, Dipteracanthus nagchana Nees, Dyschoriste depressa Nees, Dyschoriste hyssopifolia (Nees) Kuntze, Dyschoriste perrottetii (Nees) Kuntze, Linostylis fasciculiflora Fenzl ex Sond., Linostylis ovata Sond.		Herb		Perennial		1						1		1				Native			NI: Marrupa. G: R. Elefantes, Chipenhe à Xai-Xai, Mabalane à Balule. MP: Namaacha, R. Movene.	FM, FZ, POWO, TPL, WFO, APD, GBIF, LMA, LMU
Angiosperms	Eudicots	Acanthaceae Juss.	Dyschoriste	Species	Dyschoriste setigera (Pers.) J.C.Manning & Goldblatt	Calophanes persoonii (Nees) T.Anderson, Chaetacanthus glandulosus Nees, Chaetacanthus persoonii C.B.Clarke, Chaetacanthus setiger (Pers.) Lindl., Ruellia setigera Pers.		Herb		Perennial						1								Native			MC: Mt. Selinda, Espungabera.	FM, FZ, POWO, TPL, WFO, APD, GBIF, LMA, LMU
Angiosperms	Eudicots	Acanthaceae Juss.	Dyschoriste	Subspecies	Dyschoriste trichocalyx (Oliv.) Lindau subsp. verticillaris (C.B.Clarke) Vollesen	Calophanes verticillaris T.Anderson ex Oliv., Dyschoriste verticillaris (T.Anderson ex Oliv.) C.B.Clarke	Hygrophila glandulosa (Klotzsch) Lindau, Nomaphila glandulosa Klotzsch	Herb		Perennial		1				1								Native			NI: REN, R. Metapiri, Lichinga. MC: R. Nhamadzi, Mts Chimanimani.	FM, POWO, TPL, WFO, GBIF, LMA, JSTOR, BNRH
Angiosperms	Eudicots	Acanthaceae Juss.	Ecbolium	Species	Ecbolium amplexicaule S.Moore	Ecbolium auriculatum C.B.Clarke		Herb		Perennial										1		LC		Native			MP: Namaacha.	FM, FZ, POWO, IUCN Red List, TPL, WFO, APD, JSTOR, GBIF, LMA, LMU
Angiosperms	Eudicots	Acanthaceae Juss.	Ecbolium	Variety	Ecbolium clarkei Hiern var. puberulum Vollesen			Herb		Perennial								1	1					Native			I: Temane, Inhassoro. G: Massingir to Macuma.	FM, FZ, TPL, WFO, POWO, APD, LMU
Angiosperms	Eudicots	Acanthaceae Juss.	Ecbolium	Species	Ecbolium glabratum Vollesen			Herb		Perennial								1		1	NE			Native			G: Chibuto. MP: Goba, Changalane à Catuane.	FM, FZ, TPL, WFO, POWO, APD, JSTOR, GBIF, LMA, LMU, Darbyshire et al. (2019), BNRH, K
Angiosperms	Eudicots	Acanthaceae Juss.	Ecbolium	Species	Ecbolium hastatum Vollesen			Herb		Perennial								1	1	1	E	EN		Native			I: Inhassoro, Ponta São Sebastião, Vilanculos. G: Praia de Sepúlveda, Xai-Xai. MP: I. Inhaca.	TPL, WFO, POWO, IUCN Red List, FZ, GBIF, Darbyshire et al. (2019), K
Angiosperms	Eudicots	Acanthaceae Juss.	Elytraria	Species	Elytraria acaulis (L.f.) Lindau	Elytraria crenata Vahl, Elytraria indica Pers., Elytraria lyrata (Vahl) Vahl, Justicia acaulis L.f., Justicia nudicaulis Lam., Tubiflora acaulis (L.f.) Kuntze		Herb		Perennial	1			1			1	1	1					Native	Mugóa (I)		CD: Ancuabe. T: Cahora Bassa, R. Mucangádzi S: Mueredzi, Mt. Bunga, Desfiladeiro de Nhagutua, GNP. I: Govuro. G: Massangena, Mabalane, Combomune à Mabuiapanse.	FM, FZ, POWO, TPL, WFO, APD, GBIF, LMA, LMU, Koning (1993), K
Angiosperms	Eudicots	Acanthaceae Juss.	Hygrophila	Species	Hygrophila abyssinica (Nees) T.Anderson	Cardanthera justicioides S.Moore, Hemigraphis abyssinica (Nees) C.B.Clarke, Polyechma abyssinicum Nees, Synnema abyssinicum (Nees) Bremek.		Herb		Annual		1	1									LC		Native			NI: Macalonge, Sanga. NP: Cidade de Nampula.	TPL, WFO, POWO, GBIF, FM, FZ, IUCN Red List
Angiosperms	Eudicots	Acanthaceae Juss.	Hygrophila	Species	Hygrophila auriculata (Schumach.) Heine	Asteracantha auriculata Nees, Asteracantha longifolia Nees, Asteracantha macracantha Hochst. ex A.Rich., Barleria auriculata Schumach., Barleria glabrata Vahl ex Nees, Barleria hexacantha Bertol., Barleria hexacantha Moris, Barleria longifolia L., Barleria macracantha R.Br., Barleria spinosa Hook. ex Nees, Hygrophila schulli M.R.Almeida & S.M.Almeida, Hygrophila spinosa T.Anderson	Tenoria undulata Dehnh.	Herb		Annual	1	1	1		1		1	1		1		LC		Native			CD: Pemba à Montepuez. NI: Maniamba, Unango, Mepoche, Lichinga, Amaramba, Cuamba. NP: Cidade de Nampula. Z: Nicoadala, Águas Quentes à Mutarara. S: Búzi, Beira, Coutada nº 4, Lago Urema, GNP. G: Caniçado. MP: Namaacha, Boane.	TPL, WFO, POWO, IUCN Red List, APD, FZ, FM, JSTOR, GBIF
Angiosperms	Eudicots	Acanthaceae Juss.	Hygrophila	Species	Hygrophila cataractae S.Moore	Hygrophila rhodesiae Lindau		Herb		Perennial		1												Native			NI: Macalonge, Sanga.	FM, POWO, TPL, WFO, GBIF, LMA, JSTOR
Angiosperms	Eudicots	Acanthaceae Juss.	Hygrophila	Species	Hygrophila pobeguinii Benoist			Herb		Annual		1		1	1	1	1					LC		Native			NI. T. Z. S. MC.	FM, POWO, TPL, WFO, APD, IUCN Red List
Angiosperms	Eudicots	Acanthaceae Juss.	Hygrophila	Species	Hygrophila spiciformis Lindau			Herb		Perennial				1				1	1					Native			T. I. G.	FM, POWO, TPL, WFO, APD
Angiosperms	Eudicots	Acanthaceae Juss.	Hypoestes	Species	Hypoestes aristata (Vahl) Roem. & Schult.	Justicia aristata Vahl		Herb		Perennial		1			1	1	1			1		LC		Native	Nhamapondo (MC)		NI: Serra Mecula. Z: Gúruè, Mt. Mabu, Mt. Namuli. MC: Mt. Garuso, Serra Choa, Espungabera, Gondola. S: Cataratas de Morumbodzi, Serra Gorongosa. MP: Namaacha, REM.	Müller et al. (2012), Timberlake et al. (2009), TPL, WFO, POWO, IUCN Red List, GBIF, FM, FZ, LMA, Koning (1993), K, Wursten et al. (2017)
Angiosperms	Eudicots	Acanthaceae Juss.	Hypoestes	Subspecies	Hypoestes forskaolii (Vahl) R.Br. subsp. forskaolii	Hypoestes annua Hochst. & Steud., Hypoestes depauperata Lindau, Hypoestes echioides Lindau, Hypoestes forskaolii var. grandifolia Gilli, Hypoestes mlanjensis C.B.Clarke, Hypoestes mollis T.Anderson, Hypoestes preussii Lindau, Hypoestes rothii T.Anderson, Hypoestes tanganyikensis C.B.Clarke, Hypoestes violaceotincta Lindau, Justicia forskohlii R.Br. ex Steud.		Herb		Perennial		1		1		1	1	1		1				Native			NI: Lichinga. T: Boroma, Cahora Bassa. MC: Macequece, Penhalonga, Chinhaunguri, Reserva Florestal de Moribane, R. Nhamadzi River, Mts Chimanimani. S: Muanza, Cheringoma, Mt. Bunga, GNP. G: LNP, Bengo, Caniçado. MP: Matutuíne, Namaacha, Maluana à Messine.	POWO, GBIF, FZ, FM, LMA, BNRH, K
Angiosperms	Eudicots	Acanthaceae Juss.	Hypoestes	Species	Hypoestes triflora (Forssk.) Roem. & Schult.	Hypoestes consanguinea Lindau, Hypoestes kilimandscharica Lindau, Hypoestes phaylopsoides S. Moore, Justicia triflora Forssk.	Hypoestes ciliata Lindau, Hypoestes inaequalis Lindau, Hypoestes simensis Hochst. ex Schweinf., Hypoestes wallichii Nees	Herb		Perennial					1									Native			Z: Milange, encosta da serra.	POWO, GBIF, TPL, APD
Angiosperms	Eudicots	Acanthaceae Juss.	Isoglossa	Species	Isoglossa ciliata (Nees) Engl.	Isoglossa densa N.E.Br., Isoglossa sylvatica C.B.Clarke, Rhytiglossa ciliata Nees		Herb		Perennial										1				Native			MP: I. de Inhaca.	FM, POWO, TPL, WFO, APD, GBIF
Angiosperms	Eudicots	Acanthaceae Juss.	Isoglossa	Species	Isoglossa floribunda C.B.Clarke			Herb		Perennial		1			1		1							Native			NI: R. Lugenda. Z: Serra Morrumbala. S: Desfiladeiro de Muanza, Chupanga, Catapú, GNP.	FM, POWO, TPL, WFO, GBIF, LMA, JSTOR, BNRH, K
Angiosperms	Eudicots	Acanthaceae Juss.	Isoglossa	Species	Isoglossa glandulosissima K.Balkwill			Herb		Perennial										1				Native			MP: Namaacha (Goba para Fronteira da Goba).	FM, POWO, TPL, APD, GBIF
Angiosperms	Eudicots	Acanthaceae Juss.	Isoglossa	Species	Isoglossa grandiflora S.Moore			Herb		Perennial			1	1										Native			NP: Serra Ribáué. T: Moatize, Mt. Zóbuè.	FM, FZ, POWO, TPL, WFO, APD, GBIF, K
Angiosperms	Eudicots	Acanthaceae Juss.	Isoglossa	Species	Isoglossa milanjiensis S.Moore	Isoglossa mossambicensis Lindau		Herb		Perennial					1	1	1							Native			Z: Mt. Namuli. MC: Mt. Pheza, Mts Chimanimani. S: Serra Gorongosa (Mt. Nhandore, Mt. Gogógo).	FM, FZ, TPL, WFO, POWO, APD, JSTOR, GBIF, LMA, K
Angiosperms	Eudicots	Acanthaceae Juss.	Isoglossa	Species	Isoglossa namuliensis I. Darbysh. & T. Harris			Herb		Perennial					1						E	CR		Native			Z: Mt. Namuli.	TPL, WFO, POWO, IUCN Red List, GBIF, FM, FZ, Darbyshire et al. (2019), K
Angiosperms	Eudicots	Acanthaceae Juss.	Justicia	Species	Justicia aconitiflora (A.Meeuse) Cubey	Duvernoia aconitiflora A.Meeuse		Shrub												1				Native			MP: Boane, Namaacha, Matutuíne.	FZ, APD, WFO, POWO, GBIF, LMA, K
Angiosperms	Eudicots	Acanthaceae Juss.	Justicia	Species	Justicia anagalloides (Nees) T. Anderson	Adhatoda anagalloides Nees, Ecbolium anagalloides (Nees) Kuntze, Justicia psammophila Mildbr., Justicia uncinulata Oliv.		Herb		Perennial					1									Native			Z: Ile à Mugeba.	FM, FZ, POWO, TPL, WFO, APD, GBIF, LMA, LMU, K
Angiosperms	Eudicots	Acanthaceae Juss.	Justicia	Species	Justicia anselliana (Nees) T.Anderson	Adhatoda anselliana Nees, Dianthera anselliana (Nees) B.D.Jacks., Ecbolium ansellianum (Nees) Kuntze, Justicia kapiriensis De Wild.		Herb		Perennial							1	1									S: Acampamento de Chitengo, GNP. G: Chicualacuala.	POWO, TPL, WFO, APD, GBIF
Angiosperms	Eudicots	Acanthaceae Juss.	Justicia	Species	Justicia asystasioides (Lindau) M.E.Steiner	Duvernoia asystasioides Lindau, Justicia amabilis (Mildbr.) V.A.W.Graham, Justicia mildbraedii V.A.W.Graham, Thamnojusticia amabilis Mildbr., Thamnojusticia grandiflora Mildbr.		Shrub							1									Native			Z: Mt. Mabu.	FZ, POWO, TPL, WFO, APD, GBIF, LMA, LMU
Angiosperms	Eudicots	Acanthaceae Juss.	Justicia	Species	Justicia attenuifolia Vollesen			Herb		Perennial		1									NE	VU		Native			NI: Bacia do Rio Lugenda, Mbatamila, Cuanda à Mandimba.	FM, FZ, POWO, IUCN Red List, APD, JSTOR, GBIF, LMA, Darbyshire et al. (2019), K
Angiosperms	Eudicots	Acanthaceae Juss.	Justicia	Species	Justicia betonica L.	Adhatoda betonica (L.) Nees, Adhatoda cheiranthifolia Nees, Adhatoda lupulina Nees, Adhatoda variegata var. pallidior Nees, Justicia betonicoides C.B.Clarke, Justicia cheiranthifolia (Nees) C.B.Clarke, Justicia pallidior (Nees) C.B.Clarke, Justicia pallidior var. cooperi C.B. Clarke, Justicia uninervis S. Moore, Justicia trinervia Vahl		Herb		Perennial						1	1							Native			S: Cascatas de Morumbodzi, Serra Gorongosa, Cascatas de Nharizengere, GNP. MC: Reserva Florestal de Moribane, Mt. Pheza, Mts Chimanimani.	Müller et al. (2012), POWO, GBIF, TPL, WFO, FM, K, Wursten et al. (2017)
Angiosperms	Eudicots	Acanthaceae Juss.	Justicia	Species	Justicia bracteata (Hochst.) Zarb	Justicia ukambensis Lindau, Monechma affine Hochst., Monechma angustifolium Nees, Monechma bracteatum Hochst., Monechma scabrinerve C.B. Clarke, Monechma ukambense (Lindau) C.B. Clarke		Herb		Annual						1	1			1				Native			S: Campo Bunga à Mt. Chiuata, Muanza à Mueredzi, Desfiladeiro de Nhagutua, GNP. MC: Vandúzi, Dombe à Mavita. MP: REM.	FM, APD, GBIF
Angiosperms	Eudicots	Acanthaceae Juss.	Justicia	Species	Justicia campylostemon T. Anderson	Ecbolium campylostemon (Nees) Kuntze, Leptostachya campylostemon Nees, Rhaphidospora campylostemon (Nees) Lindau		Shrub											1	1							I: Morrumbene. MP: Mt. M'Ponduine, Matutuíne.	POWO, TPL, WFO, GBIF, APD
Angiosperms	Eudicots	Acanthaceae Juss.	Justicia	Species	Justicia capensis Thunb.	Adhatoda capensis (Thunb.) Nees, Justicia amygdalina E.Mey., Justicia divaricata Licht. ex Roem. & Schult., Justicia oleifolia Schltdl. ex Nees, Justicia sansibarensis Lindau		Shrub											1	1				Native			I: Vilanculos à Mapinhane. MP: Ponta Milibangalala, Machate.	POWO, APD, GBIF
Angiosperms	Eudicots	Acanthaceae Juss.	Justicia	Species	Justicia ciliata Jacq.			Shrub				1												Native			NI: Bacia do R. Lugenda.	GBIF, APD
Angiosperms	Eudicots	Acanthaceae Juss.	Justicia	Species	Justicia debilis (Forssk.) Vahl	Dianthera debilis Forssk., Justicia blepharostegia Thomson, Justicia monechmoides S. Moore, Monechma debile (Forssk.) Nees, Monechma monechmoides (S. Moore) Hutch., Monechma tettense C.B. Clarke, Monechma welwitschii C.B. Clarke		Herb		Annual				1			1			1				Native			T: Cahora Bassa, R. Mucangádzi. S: Condué à Inhaminga, GNP. MP: Palmeira, Manhiça, Ressano Garcia.	GBIF, APD, FM, BNRH
Angiosperms	Eudicots	Acanthaceae Juss.	Justicia	Species	Justicia exigua S.Moore	Justicia exilissima Chiov.		Herb		Annual										1				Native			MP: Ungubana.	FM, FZ, POWO, TPL, WFO, APD, GBIF, LMA, LMU
Angiosperms	Eudicots	Acanthaceae Juss.	Justicia	Species	Justicia fittonioides S.Moore	Justicia dolichopoda Mildbr.		Herb		Perennial	1													Native			CD: QNP.	FM, GBIF, K, APD
Angiosperms	Eudicots	Acanthaceae Juss.	Justicia	Species	Justicia flava (Forssk.) Vahl	Adhatoda fasciata Nees, Adhatoda flava (Forssk.) Nees, Adhatoda major Nees, Adhatoda minor Nees, Adhatoda plicata (Vahl) Nees, Adhatoda suaveolens Nees, Adhatoda sulcata (Vahl) Nees, Beloperone aurea Leonard, Carima sulcata Raf., Dianthera americana var. flava Forssk., Dianthera flava (Forssk.) Vahl, Ecbolium flavum (Forssk.) Kuntze, Ecbolium majus (Nees) Kuntze, Ecbolium sulcatum (Vahl) Kuntze	Justicia sulcata Vahl, Justicia trifasciata E.Mey. ex Nees	Herb		Perennial	1			1			1	1	1	1				Native		Medicine	CD: Ancuabe à Mueda. T: Mt. Furancungo, Chiputo. S: Catapú, Desfiladeiro de Nhagutua, GNP. I: Banamana à Machaila, Mambone, R. Save. G: Lagoa Nova, R. Elefantes. MP: Ressano Garcia, Avenida da Marginal, Cidade de Maputo, Boane à Goba, Moamba, Palmeira à Xinavane, Chobela, Namaacha, R. Changalane.	FM, FZ, POWO, TPL, WFO, APD, GBIF, LMA, LMU, Bruschi et al. (2011)
Angiosperms	Eudicots	Acanthaceae Juss.	Justicia	Species	Justicia francoiseana Brummitt	Adhatoda bagshawei S.Moore, Justicia bagshawei (S. Moore) Eyles		Shrub								1	1							Native			MC: Oeste de Manica.	TPL, WFO, APD, POWO, FM
Angiosperms	Eudicots	Acanthaceae Juss.	Justicia	Species	Justicia gendarussa Burm. f.	Adhatoda subserrata Nees, Dianthera subserrata Blanco, Dicliptera rheedei Kostel., Ecbolium gendarussa (Burm.f.) Kuntze, Ecbolium subserratum Kuntze, Gendarussa vulgaris Nees, Justicia dahona Buch.-Ham. ex Wall., Justicia gandarussa L.f., Justicia salicina Vahl ex Nees		Shrub																Introduced			Northen and Center Mozambique.	FM, POWO, TPL, WFO, APD
Angiosperms	Eudicots	Acanthaceae Juss.	Justicia	Species	Justicia gorongozana Vollesen			Herb		Perennial	1						1				E	LC		Native			CD: R. Messalo. S: Catapú, Nhagutua, GNP, Cheringoma.	FM, FZ, POWO, IUCN Red List, TPL, Darbyshire et al. (2019), BNRH, K
Angiosperms	Eudicots	Acanthaceae Juss.	Justicia	Species	Justicia kirkiana T.Anderson	Ecbolium kirkianum (T.Anderson) Kuntze, Justicia woodsiae S.Moore		Herb		Annual									1					Native			I: Massinga (Machisugu).	FM, FZ, TPL, WFO, POWO, LMA, GBIF
Angiosperms	Eudicots	Acanthaceae Juss.	Justicia	Species	Justicia lithospermoides Lindau			Herb		Perennial		1												Native			NI: Maniamba, Sanga.	FM, FZ, TPL, WFO, POWO, GBIF, LMA
Angiosperms	Eudicots	Acanthaceae Juss.	Justicia	Species	Justicia matammensis (Schweinf.) Oliv.	Adhatoda matammensis Schweinf.		Herb		Annual				1		1	1							Native			T: Cahora Bassa. S: Desfiladeiro de Muanza, Mt. Bunga, GNP. MC: Machango, Rotanda, Munhinga.	FM, FZ, POWO, TPL, WFO, APD, GBIF, LMA, LMU, BNRH
Angiosperms	Eudicots	Acanthaceae Juss.	Justicia	Species	Justicia mollugo C.B.Clarke			Herb		Annual				1										Native			T: Mt. Furancungo.	FM, FZ, POWO, TPL, WFO, APD, GBIF, LMA, LMU
Angiosperms	Eudicots	Acanthaceae Juss.	Justicia	Species	Justicia niassensis Vollesen			Shrub			1		1								E	EN		Native			CD: Pemba. NP: Nacala.	FM, FZ, POWO, IUCN Red List, TPL, WFO, APD, JSTOR, GBIF, LMA, LMU, Darbyshire et al. (2019), K
Angiosperms	Eudicots	Acanthaceae Juss.	Justicia	Species	Justicia nuttii C.B.Clarke	Justicia goetzei Lindau, Justicia schliebenii Mildbr.		Herb		Perennial				1										Native			T: Mt. Domué.	TPL, WFO, POWO, GBIF, FM, LMA
Angiosperms	Eudicots	Acanthaceae Juss.	Justicia	Species	Justicia nyassana Lindau	Justicia ulugurica Lindau		Herb		Perennial		1				1	1							Native			NI: Mt. Mecula. MC: Ndzou, Reserva Florestal de Moribane, Mt. Dombe, R. Nhamadzi, Mts Chimanimani. S: Coutada nº 10, 12, Cheringoma.	FM, FZ, POWO, TPL, WFO, APD, GBIF, LMA, LMU
Angiosperms	Eudicots	Acanthaceae Juss.	Justicia	Species	Justicia petiolaris T. Anderson	Adhatoda petiolaris Nees, Ecbolium petiolare (Nees) Kuntze		Herb		Perennial														Native			Southern Mozambique.	FM, POWO, TPL, WFO, APD
Angiosperms	Eudicots	Acanthaceae Juss.	Justicia	Species	Justicia phyllostachys C.B.Clarke	Justicia umbratilis S.Moore		Herb		Perennial		1												Native			NI: Locality not known.	TPL, WFO, POWO, GBIF, FM, FZ
Angiosperms	Eudicots	Acanthaceae Juss.	Justicia	Species	Justicia protracta (Nees) T. Anderson	Adhatoda microphylla Klotzsch, Adhatoda protracta (Nees) Nees, Ecbolium protractum (Nees) Kuntze, Gendarussa mollis Hochst., Gendarussa protracta Nees, Gendarussa prunellifolia Hochst., Justicia convexa E.Mey., Justicia kraussii C.B.Clarke, Justicia microphylla (Klotzsch) Lindau, Justicia pulegium E.Mey. ex Nees, Justicia woodii C.B.Clarke		Herb		Perennial				1			1	1		1				Native			T: Km 148 do Caminho de Ferro. S: Desfiladeiro de Nhagutua, GNP, Cheringoma. G: Massangena. MP: Cidade de Maputo, Namaacha, Kassimatis, R. Matola.	TPL, WFO, POWO, FM, FZ
Angiosperms	Eudicots	Acanthaceae Juss.	Justicia	Species	Justicia rhodesiana S.Moore	Justicia protracta subsp. rhodesiana (S.Moore) Immelman		Shrub										1	1					Native			I. G.	TPL, WFO, POWO, APD
Angiosperms	Eudicots	Acanthaceae Juss.	Justicia	Species	Justicia scandens Vahl	Ecbolium abyssinicum Kuntze, Gendarussa abyssinica Hochst. ex Nees, Gendarussa dichotoma Hochst. ex Nees, Justicia careyana Wall., Justicia corymbosa Willd. ex Nees, Justicia cymosa Nees, Justicia glabra J.Koenig ex Roxb., Justicia glabrata Rottler ex Wall., Justicia mauritiana Thouars ex Schult., Rhaphidospora abyssinica Nees, Rhaphidospora glabra (J.Koenig ex Roxb.) Nees, Rhaphidospora glabritu…		Herb		Annual						1	1	1		1				Native			MC: Chimoio. S: Desfiladeiro de Codzo, Catapú. G: Mabalane à Combomune. MP: Moamba à Chinhanguanine.	TPL, WFO, POWO, GBIF
Angiosperms	Eudicots	Acanthaceae Juss.	Justicia	Species	Justicia stachytarphetoides C.B. Clarke	Duvernoia stachytarphetoides Lindau		Shrub			1						1							Native			CD: R. Muacamula, Macomia, QNP. S: Mt. Bunga, GNP.	APD, GBIF, LMA, K
Angiosperms	Eudicots	Acanthaceae Juss.	Justicia	Species	Justicia striata (Klotzsch) Bullock	Adhatoda striata Klotzsch, Justicia dyschoristeoides C.B.Clarke, Justicia filifolia Lindau, Justicia forbesii S.Moore, Justicia infirma Mildbr., Justicia kaessneri S.Moore, Justicia lindaui C.B.Clarke, Justicia melampyrum S.Moore, Justicia striata subsp. austromontana Hedrén, Justicia striata var. dyschoristeoides (C.B.Clarke) Hedrén, Justicia striata var. filifolia (Lindau) J.K.Morton, Justicia …		Herb		Annual		1	1		1	1								Native			NI: Mt. Mecula, Amaramba, R. Lúrio. NP: Cidade de Nampula. Z: Mt. Namuli, Mocuba à Milange, Namacurra à Mocuba. MC: Ndzou, Reserva Florestal de Moribane, Serra Sitatonga, Serra Vumba, Matindire, Mavita, Garuso à Bandula.	Timberlake et al. (2009), TPL, WFO, POWO, GBIF, FM, FZ, Wursten et al. (2017)
Angiosperms	Eudicots	Acanthaceae Juss.	Justicia	Species	Justicia striolata Mildbr.			Herb		Annual		1												Native			NI: Lichinga.	POWO, TPL, WFO, FZ, FM
Angiosperms	Eudicots	Acanthaceae Juss.	Justicia	Species	Justicia subcordatifolia Vollesen & I.Darbysh.	Justicia hedrenii Vollesen		Herb		Perennial						1					NE			Native			MC: Serra Choa.	FM, FZ, POWO, TPL, WFO, APD, GBIF, LMA, LMU, Darbyshire et al. (2019), K
Angiosperms	Eudicots	Acanthaceae Juss.	Justicia	Species	Justicia tenella (Nees) T.Anderson	Anisostachya tenella (Nees) Lindau, Ecbolium tenellum (T.Anderson) Kuntze, Justicia crenulata (Nees) Palacky, Justicia tenella f. crenulata (Nees) Vatke, Rostellaria parviflora Benth., Rostellaria tenella Nees, Rostellularia crenulata Nees, Rostellularia parviflora Benth., Rostellularia tenella Nees, Rungia baumannii Lindau	Strobilanthes crenulata Bojer ex Nees	Herb		Annual					1	1	1							Native			Z: Serra Gúruè, Mopeia, Namarroi. MC: Sussundenga. S: GNP.	FM, FZ, TPL, WFO, APD, JSTOR, GBIF, K
Angiosperms	Eudicots	Acanthaceae Juss.	Justicia	Species	Justicia whytei S.Moore			Herb		Perennial						1								Native			MC: Serra Choa, Vandúzi.	FM, FZ, POWO, TPL, WFO, APD, GBIF, LMA, LMU
Angiosperms	Eudicots	Acanthaceae Juss.	Lankesteria	Species	Lankesteria alba Lindau			Herb		Perennial		1										LC		Native			NI: Locality not known.	FM, FZ, TPL, WFO, POWO, IUCN Red List, GBIF, LMA, K
Angiosperms	Eudicots	Acanthaceae Juss.	Lepidagathis	Species	Lepidagathis andersoniana Lindau			Herb		Perennial		1	1	1	1									Native			NI: Sanga, Unango, Malanga, Matukuta, Chiconono. NP: Ribáuè à Lalaua. T: Ulónguè. Z: Gúruè.	FM, POWO, TPL, WFO, GBIF, LMA, JSTOR
Angiosperms	Eudicots	Acanthaceae Juss.	Lepidagathis	Species	Lepidagathis eriocephala Lindau			Herb		Perennial		1												Native			NI: Lichinga.	FM, FZ, POWO, TPL, WFO, APD, GBIF, LMA, LMU
Angiosperms	Eudicots	Acanthaceae Juss.	Lepidagathis	Species	Lepidagathis lanatoglabra C.B.Clarke	Lepidagathis nematocephala Lindau, Lepidagathis sparsiceps C.B.Clarke		Herb		Perennial		1												Native			NI: Sanga.	FM, FZ, POWO, TPL, WFO, APD, GBIF, LMA, LMU
Angiosperms	Eudicots	Acanthaceae Juss.	Lepidagathis	Species	Lepidagathis pallescens S.Moore			Herb		Perennial		1		1	1									Native			NI. T. Z.	FM, POWO, TPL, WFO, APD
Angiosperms	Eudicots	Acanthaceae Juss.	Lepidagathis	Species	Lepidagathis plantaginea Mildbr.			Herb		Perennial	1		1								NE	EN		Native			CD: Ngapa à Negomano. NP: Mt. Matuta.	FM, FZ, POWO, IUCN Red List, TPL, WFO, APD, JSTOR, GBIF, LMA, LMU, Darbyshire et al. (2019), K
Angiosperms	Eudicots	Acanthaceae Juss.	Lepidagathis	Species	Lepidagathis scariosa Nees	Lepidagathis lanata Wall. ex Nees, Lepidagathis sciaphila S.Moore, Lepidagathis terminalis Hochst. ex Nees, Ruellia aristata Vahl, Volkensiophyton neuracanthoides Lindau		Herb		Perennial						1	1							Native			S. MC.	GBIF
Angiosperms	Eudicots	Acanthaceae Juss.	Megalochlamys	Species	Megalochlamys hamata (Klotzsch) Vollesen	Blechum hamatum Klotzsch, Ecbolium hamatum (Klotzsch) C.B.Clarke, Ecbolium lugardiae N.E.Br., Megalochlamys strobilifera C.B.Clarke, Petalidium hamatum Lindau		Herb		Perennial				1				1		1				Native			T: Cahora Bassa. G: Banhine. MP: Chinhanguanine, Moamba.	FM, FZ, POWO, TPL, WFO, APD, GBIF
Angiosperms	Eudicots	Acanthaceae Juss.	Megalochlamys	Subspecies	Megalochlamys revoluta (Lindau) Vollesen subsp. cognata (N.E.Br.) Vollesen	Ecbolium cognatum N.E.Br., Ecbolium schlechteri Lindau		Herb		Perennial								1						Native			G: Massingir para Aldeia da Barragem.	FM, FZ, POWO, TPL, WFO, APD, GBIF
Angiosperms	Eudicots	Acanthaceae Juss.	Mellera	Species	Mellera lobulata S.Moore	Mellera angustata Lindau		Herb		Perennial		1			1	1	1							Native			NI: Amaramba, Mandimba. Z: Mt. Morrumbala. MC: Reserva Florestal de Moribane, Serra Machango, Dombe, Espungabera. S: Cascatas de Morumbodzi, Serra Gorongosa.	Müller et al. (2012), FM, FZ, POWO, TPL, WFO, APD, GBIF, LMA, LMU, Wursten et al. (2017)
Angiosperms	Eudicots	Acanthaceae Juss.	Mellera	Species	Mellera nyassana S.Moore			Shrub				1												Native			NI: Maniamba, R. Mepoche.	FM, FZ, POWO, TPL, WFO, APD, GBIF, LMA, LMU
Angiosperms	Eudicots	Acanthaceae Juss.	Mimulopsis	Species	Mimulopsis arborescens C.B.Clarke	Mimulopsis longisepala Mildbr.		Shrub							1							LC	Requiring to add Mozambique in the geographic range	Native			Z: Locality not known.	FM, POWO, TPL, APD, IUCN Red List
Angiosperms	Eudicots	Acanthaceae Juss.	Mimulopsis	Species	Mimulopsis solmsii Schweinf.	Mimulopsis bagshawei S.Moore, Mimulopsis bicalcarata Lindau, Mimulopsis sesamoides S.Moore, Mimulopsis solmsii var. kivuensis (Mildbr.), Troupin Mimulopsis solmsii var. mikenica (Mildbr.) Troupin, Mimulopsis solmsii var. orophila Troupin, Mimulopsis spathulata C.B.Clarke, Mimulopsis thomsonii C.B.Clarke, Mimulopsis usumburensis Lindau, Mimulopsis velutinella Mildbr., Mimulopsis violacea Lindau		Herb		Perennial					1		1							Native			Z: Mt. Namuli, Gúruè. S: Mt. Nhandore (Serra Gorongosa).	Müller et al. (2012), Timberlake et al. (2009), FM, POWO, TPL, WFO, GBIF, LMA, JSTOR
Angiosperms	Eudicots	Acanthaceae Juss.	Nelsonia	Species	Nelsonia canescens (Lam.) Spreng.	Acanthodium spicatum Nees, Dianthera celebica Rolfe, Dianthera tomentosa Roxb. ex C.B.Clarke, Justicia ajugoides Buch.-Ham. ex Nees, Justicia bengalensis Spreng., Justicia canescens Lam., Justicia lamiifolia J.Koenig ex Roxb., Justicia nummulariifolia Vahl, Justicia origanoides Vahl, Justicia pentasticha Buch.-Ham. ex Wall., Justicia pusilla Pohl ex Nees, Justicia tomentosa Roxb., Justicia vestit…		Herb		Perennial	1	1			1							LC		Native	Cissito (T); Katcheue (X.nya); Katchene (T); Katxewe (T)		CD: Quiterajo. NI: Maniamba (R. Messinge). Z: Entre Milange e Mopeia.	GBIF, FM, POWO, IUCN Red List, TPL, WFO, APD, Koning (1993), K
Angiosperms	Eudicots	Acanthaceae Juss.	Nelsonia	Species	Nelsonia smithii Oerst.	Nelsonia canescens var. smithii (Oerst.) E.Hossain		Herb		Perennial				1													T: Cahora Bassa (R. Mucangádzi).	GBIF, APD, POWO
Angiosperms	Eudicots	Acanthaceae Juss.	Neuracanthus	Species	Neuracanthus africanus T.Anderson ex S.Moore			Herb		Perennial	1			1		1	1	1		1				Native			CD: Ancuabe à Mueda. T: Cahora Bassa. S: Codzo, Mt. Bunga, GNP. MC: Tambara à Mts Nhamalongo. G: Massangena, R. Save. MP: Moamba - Ressano Garcia.	TPL, WFO, POWO, GBIF, FZ, FM, LMA, BNRH, K
Angiosperms	Eudicots	Acanthaceae Juss.	Phaulopsis	Subspecies	Phaulopsis imbricata (Forssk.) Sweet subsp. imbricata	Aetheilema anisophyllum (Juss.) E.Mey. ex Nees, Aetheilema longifolium Spreng., Aetheilema mucronatum Griff., Aetheilema parviflorum Spreng., Aetheilema reniforme Nees, Antheilema imbricata Raf., Barleria inaequalis Hochst. ex A.Rich., Blechum anisophyllum Juss., Micranthus imbricatus Kuntze, Micranthus longifolius (Sims) Kuntze, Phaulopsis inaequalis Pic.Serm., Phaulopsis longifolia Thomson ex C…		Shrub							1	1	1	1		1				Native	Icocantani (MP,rong)		Z: Mt. Mabu. MC: Reserva Florestal de Moribane, Mts Chimanimani, Madzundzu. S: Cavalo, Santungira, Desfiladeiro de Murombodzi, Serra Gorongosa. G: Bilene, Parque Flores. MP: Ponta dobela, Matutuíne, Cascatas da Namaacha, I. Inhaca.	FM, FZ, POWO, APD, JSTOR, GBIF, LMA, LMU, Koning (1993), BNRH, Wursten et al. (2017)
Angiosperms	Eudicots	Acanthaceae Juss.	Pseuderanthemum	Species	Pseuderanthemum hildebrandtii (C.B.Clarke) Lindau	Eranthemum hildebrandtii (Lindau) C.B.Clarke		Shrub							1									Native			Z: Locality not known.	FM, POWO, TPL, APD
Angiosperms	Eudicots	Acanthaceae Juss.	Pseuderanthemum	Species	Pseuderanthemum subviscosum (C.B.Clarke) Stapf	Eranthemum lindaui C.B.Clarke, Eranthemum subviscosum C.B.Clarke, Pseuderanthemum albocoeruleum Champl., Pseuderanthemum albocoeruleum subsp. robustum Champl.		Shrub							1	1	1							Native			Z: Mt. Mabu, Mt. Namuli, Serra Chiperone. S: Cheringoma (Desfiladeiro do rio Codzo). MC: Mts. Chimanimani, Ndzou, Reserva Florestal de Moribane, Zomba, CNR.	Müller et al. (2012), Timberlake et al. (2009), FZ, POWO, TPL, WFO, APD, GBIF, LMA, LMU, K, Wursten et al. (2017)
Angiosperms	Eudicots	Acanthaceae Juss.	Pseudocalyx	Species	Pseudocalyx saccatus Radlk.	Pseudocalyx africanus S.Moore, Thunbergia chrysochlamys Baker, Thunbergia deflexiflora Baker		Herb		Perennial						1								Native			MC: Sussundenga à Dombe, Missão de Amatongas, Serra Garuso.	FM, FZ, POWO, TPL, WFO, APD, GBIF, LMA, LMU, BNRH
Angiosperms	Eudicots	Acanthaceae Juss.	Rhinacanthus	Species	Rhinacanthus gracilis Klotzsch			Herb		Perennial		1	1				1							Native			NI: Mandimba. NP: I. Goa. S: GNP.	FZ, POWO, TPL, WFO, APD, GBIF, LMA, LMU
Angiosperms	Eudicots	Acanthaceae Juss.	Rhinacanthus	Species	Rhinacanthus submontanus T.Harris & I.Darbysh.			Herb		Perennial							1					VU		Native			S: Serra Gorongosa.	TPL, WFO, POWO, IUCN Red List, GBIF, FM, FZ
Angiosperms	Eudicots	Acanthaceae Juss.	Rhinacanthus	Species	Rhinacanthus xerophilus A. Meeuse			Herb		Perennial								1		1				Native			G: Distrito de Limpopo. MP: Ressano Garcia.	FM, POWO, TPL, WFO, APD
Angiosperms	Eudicots	Acanthaceae Juss.	Rhinacanthus	Species	Rhinacanthus zambesiacus I.Darbysh.	Rhinacanthus communis sensu C.B. Clarke		Herb		Perennial		1			1		1							Native			NI: Mandimba. Z: Milange, Morrumbala, Namagoa. S: Mt. Bunga, GNP, Serra Xiluvo.	FM, FZ, POWO, TPL, WFO, APD, GBIF
Angiosperms	Eudicots	Acanthaceae Juss.	Ruellia	Species	Ruellia bignoniiflora S.Moore	Dipteracanthus bignoniiflorus (S.Moore) Bremek., Dischistocalyx bignoniiflorus Lindau, Ruellia cygniflora Lindau, Ruellia megachlamys S.Moore		Herb		Perennial				1										Native			T: Boroma, Lifídzi.	FM, POWO, TPL, APD, GBIF
Angiosperms	Eudicots	Acanthaceae Juss.	Ruellia	Species	Ruellia cordata Thunb.	Dipteracanthus cordifolius Nees		Herb		Perennial							1			1				Native			S: Nhancuco, Cascatas de Morumbodzi, Serra Gorongosa. MP: Boane.	FM, FZ, POWO, TPL, WFO, APD, GBIF, LMA, LMU
Angiosperms	Eudicots	Acanthaceae Juss.	Ruellia	Species	Ruellia patula Jacq.	Dipteracanthus erectus Nees, Dipteracanthus matutinus C.Presl, Dipteracanthus ocymoides C.Presl, Dipteracanthus patulus (Jacq.) Nees, Petalidium patulum (Jacq.) Dalzell & A.Gibson		Herb		Perennial										1				Native			MP: Catuane, Goba, Boane.	FM, FZ, POWO, TPL, WFO, APD, GBIF, LMA, LMU
Angiosperms	Eudicots	Acanthaceae Juss.	Ruellia	Species	Ruellia praetermissa Schweinf. ex Lindau			Herb		Perennial														Native			Norte de Moçambique.	FM, FZ, POWO, TPL, WFO, APD, GBIF, LMA, LMU
Angiosperms	Eudicots	Acanthaceae Juss.	Ruellia	Species	Ruellia prostrata Poir.	Dipteracanthus dejectus Nees, Dipteracanthus genduanus Schweinf., Dipteracanthus prostratus (Poir.) Nees, Ruellia deccanensis J.Graham, Ruellia genduana (Schweinf.) C.B.Clarke, Ruellia nubica Delile, Ruellia otaviensis P.G.Mey., Ruellia prostrata var. dejecta (Nees) C.B. Clarke		Herb		Perennial				1	1		1							Native			T: Cahora Bassa. Z: Serra Chiperone, Mugeba - Mocubela - Pebane. S: Chitengo, GNP.	Timberlake et al. (2009), TPL, WFO, POWO, FM, FZ, GBIF, LMA, K
Angiosperms	Eudicots	Acanthaceae Juss.	Ruspolia	Species	Ruspolia australis (Milne-Redh.) Vollesen			Shrub				1		1						1				Native			NI. T. MP.	FM, POWO, TPL, WFO, APD
Angiosperms	Eudicots	Acanthaceae Juss.	Ruspolia	Species	Ruspolia decurrens (Hochst. ex Nees) Milne-Redh.	Eranthemum senense Klotzsch, Pseuderanthemum decurrens (Hochst. ex Nees) Radlk., Pseuderanthemum senense (Klotzsch) Radlk., Siphoneranthemum decurrens (Hochst. ex Nees) Kuntze, Siphoneranthemum senense (Klotzsch) Kuntze		Shrub						1	1		1							Native			T: Cahora Bassa, Moatize. Z: Namacurra à Maganja da Costa. S: Cheringoma.	FZ, POWO, TPL, WFO, APD, GBIF, LMA, LMU, BNRH
Angiosperms	Eudicots	Acanthaceae Juss.	Ruspolia	Species	Ruspolia seticalyx (C.B.Clarke) Milne-Redh.	Eranthemum seticalyx C.B.Clarke, Pseuderanthemum seticalyx (C.B.Clarke) Stapf		Shrub									1							Native			S: Catapú, Desfiladeiros de Nhagutua e Codzo, GNP.	GBIF, POWO, TPL, WFO, FM, FZ, BNRH
Angiosperms	Eudicots	Acanthaceae Juss.	Ruttya	Species	Ruttya ovata Harv.	Duvernoia trichocalyx Lindau		Shrub			1									1				Native	Morame (NP,macu)		CD: Costa da Praia de Wimbe. MP: Cascatas, Matianine, Namaacha.	TPL, WFO, GBIF, LMA, Burrows et al. (2018)
Angiosperms	Eudicots	Acanthaceae Juss.	Sclerochiton	Species	Sclerochiton apiculatus Vollesen			Shrub							1	1		1		1	NE	VU		Native			Z: Praia de Pebane. MC: Maringa, Mts Chimanimani. G: Chipenhe, Manjacaze. MP: Chinhanguanine, Sabié, Reserva Florestal de Licuáti, Bela Vista, Ponta do Ouro, Matutuíne.	FM, FZ, POWO, IUCN Red List, TPL, WFO, APD, JSTOR, GBIF, LMA, LMU, Darbyshire et al. (2019), BNRH, Burrows et al. (2018), K
Angiosperms	Eudicots	Acanthaceae Juss.	Sclerochiton	Species	Sclerochiton coeruleus S.Moore	Pseudoblepharis coerulea Lindau		Shrub					1		1	1		1	1	1	NE	NT		Native			NP: Mossuril, Serra Mesa. Z: Praia de Pebane, Moeabse à Alto Molócuè. MC: Maringa, R. Makurupini, Mts Chimanimani. I: Massinga, Panda, Mapinhane. G: Chipenhe, Muchopes, Manjacaze. MP: Bela Vista, Salamanga, R. Fúti.	FM, FZ, TPL, WFO, POWO, GBIF, LMU, LMA, Darbyshire et al. (2019), Burrows et al. (2018), K
Angiosperms	Eudicots	Acanthaceae Juss.	Sclerochiton	Species	Sclerochiton harveyanus Nees			Shrub									1							Native			S: Vale de Vandúzi, Santunjira, Serra Gorongosa.	FM, FZ, POWO, TPL, WFO, APD, GBIF, LMA, LMU, Burrows et al. (2018)
Angiosperms	Eudicots	Acanthaceae Juss.	Sclerochiton	Species	Sclerochiton hirsutus Vollesen			Shrub							1						E	VU		Native			Z: Mt. Mabu, Mt. Namuli.	Timberlake et al. (2009), FM, FZ, POWO, IUCN Red List, TPL, WFO, APD, JSTOR, GBIF, LMA, LMU, Darbyshire et al. (2019), Burrows et al. (2018), K
Angiosperms	Eudicots	Acanthaceae Juss.	Sclerochiton	Species	Sclerochiton kirkii (T. Anderson) C.B. Clarke	Acanthus kirkii T.Anderson		Shrub					1				1							Native			NP: Reserva Florestal do Sr. Wolf, Monapo, Eráti. S: Muanza, Catapú, Desfiladeiro de Codzo, Cheringoma.	TPL, WFO, POWO, GBIF, LMA, FZ, FM, BNRH, Burrows et al. (2018)
Angiosperms	Eudicots	Acanthaceae Juss.	Sclerochiton	Subspecies	Sclerochiton vogelii (Nees) T.Anderson subsp. congolanus (De Wild.) Vollesen	Butayea congolana De Wild., Sclerochiton albus De Wild., Sclerochiton cyaneus De Wild., Sclerochiton sousae Benoist		Shrub				1												Native			NI: Locality not known.	FM, POWO, TPL, APD
Angiosperms	Eudicots	Acanthaceae Juss.	Thunbergia	Species	Thunbergia alata Bojer ex Sims	Endomelas alata (Bojer ex Sims) Raf., Thunbergia albiflora Gordon, Thunbergia aurantiaca Paxton, Thunbergia bikimaensis De Wild., Thunbergia delamerei S.Moore, Thunbergia doddsii Paxton, Thunbergia fuscata T.Anderson ex Lindau, Thunbergia kamatembica Mildbr., Thunbergia manganjensis Lindau, Thunbergia nymphaeifolia Lindau, Thunbergia oculata S.Moore, Valentiana volubilis Raf.		Herb		Perennial			1	1	1	1	1	1						Native			NP: Serra Ribáuè. T: Ulónguè, R. Capambadzi. Z: Gúruè. MC: Reserva Florestal de Moribane. S: Nhancuco, Cascatas de Morumbodzi, Cascatas de Nharizengere, Serra Gorongosa. G: Floresta Sagrada de Chirindzene.	FM, FZ, POWO, TPL, WFO, APD, GBIF, LMA, LMU, Wursten et al. (2017)
Angiosperms	Eudicots	Acanthaceae Juss.	Thunbergia	Species	Thunbergia crispa Burkill			Shrub								1	1							Native			MC: Gondola, Chimoio, Vandúzi, Serra Chindaza. S: Cascatas de Morumbodzi, Bunga à Mt. Chiuata, Serra Gorongosa, GNP.	FM, FZ, POWO, TPL, WFO, APD, GBIF, LMA, LMU
Angiosperms	Eudicots	Acanthaceae Juss.	Thunbergia	Species	Thunbergia dregeana C.Presl	Thunbergia monroi S.Moore, Thunbergia woodii Gand.		Herb	Climber	Perennial										1				Native			MP: Namaacha, R. Movene.	FM, FZ, POWO, TPL, WFO, APD, GBIF, LMA, LMU
Angiosperms	Eudicots	Acanthaceae Juss.	Thunbergia	Species	Thunbergia huillensis S.Moore	Thunbergia angustata De Wild., Thunbergia hanningtonii Burkill, Thunbergia kaessneri S.Moore, Thunbergia randii S.Moore		Herb		Perennial				1											Bete (T,Jaua)		T: Fíngoè à Nhimbe.	GBIF, APD, TPL, WFO, POWO, Koning (1993)
Angiosperms	Eudicots	Acanthaceae Juss.	Thunbergia	Species	Thunbergia kirkiana T.Anderson	Thunbergia acutibracteata De Wild., Thunbergia michelana De Wild., Thunbergia proxima De Wild., Thunbergia proximoides De Wild., Thunbergia subfulva S.Moore, Thunbergia verdickii De Wild.		Herb		Perennial			1	1										Native			NP: Ribáuè. T: Ulónguè.	POWO, TPL, WFO, FZ, FM
Angiosperms	Eudicots	Acanthaceae Juss.	Thunbergia	Species	Thunbergia kirkii Hook.f.	Thunbergia amanensis Lindau		Herb		Perennial					1									Native			Z: Serra Morrumbala.	FM, FZ, POWO, TPL, WFO, APD, GBIF, LMA, LMU
Angiosperms	Eudicots	Acanthaceae Juss.	Thunbergia	Species	Thunbergia lancifolia T.Anderson	Thunbergia bequaertii De Wild., Thunbergia cerinthoides Radlk., Thunbergia elskensii De Wild., Thunbergia friesii Lindau, Thunbergia gentianoides Radlk., Thunbergia glaberrima Lindau, Thunbergia hockii De Wild., Thunbergia lancifolia var. auriculata S.Moore, Thunbergia lancifolia var. laevis S.Moore, Thunbergia lancifolia var. pallida S.Moore, Thunbergia puberula Lindau, Thunbergia valida S.Moore		Herb		Perennial		1	1	1	1	1								Native	Mphepu (T); Mulombue (T,seng); Mulombué (T); Pepu (T,yao); Psipa (T,seng); Psipsa (T)	Medicine	NI: Lichinga à Matama. NP: Cidade de Nampula. T: Gandale, Furancungo, Zóbuè. Z: Marávia, Serra Chiperone, Gúruè, Mocuba, Milange. MC: Mt. Garuso, Chimoio à R. Punguè.	Timberlake et al. (2009), FM, FZ, POWO, TPL, WFO, APD, GBIF, LMA, LMU, Koning (1993), Conde et al. (2014)
Angiosperms	Eudicots	Acanthaceae Juss.	Thunbergia	Species	Thunbergia oblongifolia Oliv.	Thunbergia manikensis De Wild.		Herb		Perennial							1							Native			S: Serra Gorongosa.	FM, FZ, POWO, TPL, WFO, APD, GBIF, LMA, LMU
Angiosperms	Eudicots	Acanthaceae Juss.	Thunbergia	Species	Thunbergia petersiana Lindau	Thunbergia katangensis De Wild., Thunbergia mollis Lindau, Thunbergia stuhlmanniana Lindau, Thunbergia torrei Benoist, Thunbergia zernyi Mildbr.		Herb		Perennial		1	1		1	1	1							Native			NI: Lichinga, Marrupa. NP: Cidade de Nampula. Z: Serra Chiperone, Serra Gúruè, Mocuba à Milange. MC: Reserva Florestal de Moribane, Báruè, Mavita. S: Cascatas de Morumbodzi, Serra Gorongosa, Nhago, Chironde, Mpawe, Coutada nº 12, Cheringoma.	Müller et al. (2012), FM, FZ, GBIF, TPL, WFO, POWO, LMA
Angiosperms	Eudicots	Acanthaceae Juss.	Thunbergia	Species	Thunbergia schimbensis S.Moore			Herb		Perennial							1							Native			S: Catapú, Chironde, Coutada nº 12, Cheringoma.	FM, FZ, TPL, WFO, POWO, GBIF, LMA
Angiosperms	Eudicots	Acanthaceae Juss.	Thunbergia	Species	Thunbergia stelligera Lindau			Shrub									1							Native			S: Condué à Inhaminga.	POWO, FZ, FM, GBIF, LMA, BNRH, Burrows et al. (2018)
Angiosperms	Eudicots	Acanthaceae Juss.	Thunbergia	Species	Thunbergia subalata Lindau			Herb	Climber	Perennial		1												Native			NI: Locality not known.	FM, POWO, TPL, APD
Angiosperms	Eudicots	Acanthaceae Juss.	Thunbergia	Species	Thunbergia usambarica Lindau			Herb		Perennial						1	1							Native			MC: Mt. Tsetsera. S: Mt. Nhandore (Serra Gorongosa).	FM, FZ, POWO, TPL, WFO, APD, GBIF, LMA, LMU
Angiosperms	Eudicots	Acanthaceae Juss.	Whitfieldia	Species	Whitfieldia orientalis Vollesen			Shrub			1													Native			CD: Nangade à Mueda.	FZ, POWO, TPL, WFO, APD, GBIF, LMA, LMU, BNRH, Burrows et al. (2018), K
Angiosperms	Eudicots	Achariaceae Harms	Buchnerodendron	Species	Buchnerodendron lasiocalyx (Oliv.) Gilg	Buchnerodendron bussei Gilg, Buchnerodendron nanum Gilg, Oncoba eximia Gilg, Oncoba lasiocalyx Oliv.		Shrub			1		1		1							LC		Native	Korateto(NP,macu); Koratiti(NP,macu); Koratole(NP,macu); makuranjassa(NP,macu); Muntakewe(CD,macu); Munthahewo(CD,macu); Murrege(NP); M'Kuratiti(NP,macu); Nacocolo(CD,macu)		CD: Nangororo, Quiterajo, Pemba, Mucoja, Mt. Ancuabe, Mt. Balama, Macondes, Nangade, Mt. Nhavarra. NP: Memba, Barragem de Nacala, Imala, Reserva Florestal do Sr. Wolf, Namacura, Ribáuè, Muecate. Z: Entre Caia e Nicuadala, Mocuba, Muobede.	FZ, POWO, TPL, WFO, APD, GBIF, IUCN Red List, Koning (1993), BNRH, Burrows et al. (2018), K
Angiosperms	Eudicots	Achariaceae Harms	Caloncoba	Species	Caloncoba welwitschii (Oliv.) Gilg	Caloncoba cauliflora Sleumer, Caloncoba gigantocarpa Gilg, Caloncoba grotei Gilg, Oncoba laurentii De Wild. & T.Durand, Oncoba spireana Pierre, Oncoba welwitschii Oliv.		Shrub			1		1		1							LC		Native	Mukura-Massa (NP,macu); Mukura-Niassa (NP,macu); N'Kuratiti (NP,macu)	Food, Medicine	NP: Nametil, Reserva Florestal de Matibane, Mossuril, Reserva Florestal do Sr. Wolf. Z: Mt. Mabu, Mueda. CD: Quiterajo, Floresta Namacubi	POWO, IUCN Red List, GBIF, BNRH, Burrows et al. (2018), K
Angiosperms	Eudicots	Achariaceae Harms	Grandidiera	Species	Grandidiera boivinii Jaub.			Shrub									1					LC	Requiring to add Mozambique in the geographic range	Native			S: Inhaminga.	POWO, TPL, WFO, IUCN Red List, LMA, GBIF, FZ, FM, JSTOR, BNRH, Burrows et al. (2018)
Angiosperms	Eudicots	Achariaceae Harms	Hydnocarpus	Species	Hydnocarpus venenatus Gaertn.	Hydnocarpus inebrians Vahl		Tree									1							Introduced		Medicine	S: Amatongas	GBIF, POWO,TPL, WFO, FM, Conde et al. (2014)
Angiosperms	Eudicots	Achariaceae Harms	Kiggelaria	Species	Kiggelaria africana L.	Kiggelaria dregeana Turcz., Kiggelaria ferruginea Eckl. & Zeyh., Kiggelaria flavovelutina Sleumer, Kiggelaria glandulosa Salisb., Kiggelaria grandifolia Warb., Kiggelaria hylophila Gilg, Kiggelaria integrifolia Jacq., Kiggelaria serrata Warb. ex Engl.		Shrub				1		1		1	1					LC		Native	Sema-Sema (S)		T: Angónia, Mt. Domuè. MC: Tsetsera. S: Serra Gorongosa. NI: Metapiri.	Müller et al. (2012), FZ, POWO, TPL, WFO, APD, GBIF, LMA, LMU, IUCN Red List, Koning (1993), BNRH, Burrows et al. (2018), Wursten et al. (2017)
Angiosperms	Eudicots	Achariaceae Harms	Lindackeria	Species	Lindackeria stipulata (Oliv.) Milne-Redh. & Sleumer	Buchnerodendron stipulatum (Oliv.) Bullock, Lindackeria grewioides Sleumer, Oncoba stipulata Oliv.		Shrub				1															NI: Marrupa à Mecula, Manda Wilderness Area (between Metangula and Cóbuè).	TPL, POWO, BNRH, LMA
Angiosperms	Eudicots	Achariaceae Harms	Rawsonia	Species	Rawsonia lucida Harv. & Sond.	Rawsonia reticulata Gilg, Rawsonia schlechteri Gilg, Rawsonia spinidens (Hiern) Mendonça & Sleumer, Rawsonia transjubensis Chiov., Rawsonia ugandensis Dawe & Sprague, Rawsonia uluguruensis Sleumer, Rawsonia usambarensis Engl. & Gilg		Shrub			1	1			1	1	1	1		1		LC		Native	Mikunho (NI); Mikunhuo (CD,macu); Muchecamani (MC,sho)		MP: Estatuene. G: Lumane, Chongoene, Chirindzene. Z: Mt. Namuli, Serra Chiperone, Mt. Mabu. S: Inhaminga, Mossurize, GNP, Durúndi, Muanza. MC: Serra Choa, Serra Machongo, Gondola, Garuso, Mts Chimanimani, Chiniziua, Tsetsera. CD: Mueda. NI: Serra Mecula	Müller et al. (2012), Timberlake et al. (2007), Timberlake et al. (2009), Bayliss et al. (2010), TPL, WFO, POWO, IUCN Red List, GBIF, FM, FZ, Koning (1993), BNRH, Burrows et al. (2018), K, Wursten et al. (2017)
Angiosperms	Eudicots	Achariaceae Harms	Xylotheca	Species	Xylotheca kraussiana Hochst.	Oncoba kraussiana (Hochst.) Planch., Xylotheca kotzei E.Phillips, Xylotheca lasiopetala Gilg		Shrub			1							1	1	1		LC		Native	Balecane (G); Balecuane (G); Chigutana (MP); Gutana (MP,rong); Ntova (MP,rong); Uassate (G,rong); Xigutani (MP,rong)	Food	MP: I.Inhaca, Marracuene, Manhiça, Costa do Sol, Bobole. G: LNP, Xai-Xai. I: Ponta Závora, Massinga, Homoine, Mabote, Pomene. CD: Quiterajo	GBIF, POWO, IUCN Red List,TPL, WFO, FM, FZ, Koning (1993), Santo-António and Goulão (2015), BNRH, Burrows et al. (2018)
Angiosperms	Eudicots	Achariaceae Harms	Xylotheca	Variety	Xylotheca tettensis (Klotzsch) Gilg var. kirkii (Oliv.) Wild	Oncoba tettensis var. kirkii (Oliv.) Hul & Breteler		Shrub			1		1	1	1				1					Native			CD: Mocímboa de Praia. NP: Mecuburi. T: Furancungo. Z: Mocubela, Mutange. I: Pomene	FZM, APD, GBIF, LMA, LMU, BNRH, K
Angiosperms	Eudicots	Achariaceae Harms	Xylotheca	Variety	Xylotheca tettensis (Klotzsch) Gilg var. macrophylla (Klotzsch) Wild	Oncoba tettensis var. macrophylla (Klotzsch) S.Hul & Fy.Breteler, Xylotheca macrophylla (Klotzsch) Sleum.		Shrub			1	1	1	1	1		1	1	1	1				Native	Cau (CD,macu); Kaukau (NP,macu); Mutchinama (T)		MP: I.Inhaca. G: Entre Manjacaze e Chongoene, Macia, Xai-Xai, Chidenguele. I: Pomene, Mapinhane. S: Inhaminga, Inhamitanga, GNP, Sena, Catapu. Z: Entre Milange e Ile, Mocuba, Maganja da Costa, Namagoa, Pebane. T: Cabora Bassa. NP: Mutuáli, Imala, Nawowane, Reserva Florestal do Sr. Wolf, Lalaua, Mossuril. CD: Montepuez, Macondes, Macomia, Porto Amelia, Chiure, Ancuabe, Namatuco. NI: Namuno, Moginc…	FM, GBIF, LMA, JSTOR, Koning (1993), BNRH, Burrows et al. (2018), K
Angiosperms	Eudicots	Achariaceae Harms	Xylotheca	Variety	Xylotheca tettensis (Klotzsch) Gilg var. tettensis			Shrub			1	1	1	1	1		1		1					Native	Akaukau (CD,macu); Ateira (Z,sho); Caucau (NI,yao); Kaukau (NP,macu); Kavokavo (CD,macu); Khakau (NP,macu); Muanancana (NI,yao); Mucaro-Caro (NI,yao); Mucaro-Mucaro (NI,yao); Mucaucau (NI,yao); Mutchinama (T); M'Caucau (Z,sho); M'Khakau (NP,macu); Nakoma (NP,macu); Taleia (NP,macu); Tàliâ (NP,macu)	Medicine	CD: QNP, Nhica do Rovuma, Chipembe, Montepuez-Mueda. NI: REN (ao longo do Rio Metapiri). NP: Mecubúri. T: Mágoè para Mágoè Velho, Cahora Bassa. Z: Namagoa. S: Sena, GNP, Búzi, Grudja, Marínguè, Catapu. I: Pomene, Zavala.	GBIF, LMA, POWO, FM, TPL, WFO, Koning (1993), Bandeira et al. (2007), BNRH, K
Angiosperms	Eudicots	Aizoaceae Martinov	Aizoon	Species	Aizoon canariense L.			Herb		Annual								1		1				Native			G: Baixo Changana. MP: Tinonganine, Bela Vista, Santaca, Umbelúzi, Umbelúzi, Goba, Namaacha, Rio Movene	JSTOR, FZ, TPL, FM, GBIF, LMA, APD
Angiosperms	Eudicots	Aizoaceae Martinov	Aptenia	Species	Aptenia cordifolia (L.fil.) Schwant.			Herb		Perennial										1				Introduced			MP: Sábiè, Mangulane, Moamba	FM, FZ, POWO, TPL, WFO, APD, GBIF, LMA, LMU
Angiosperms	Eudicots	Aizoaceae Martinov	Carpobrotus	Species	Carpobrotus deliciosus (L.Bolus) L.Bolus			Herb		Perennial									1					Native		Ornament	I: Pomene	GBIF, POWO, TPL, WFO, FM, FZ
Angiosperms	Eudicots	Aizoaceae Martinov	Carpobrotus	Species	Carpobrotus dimidiatus (Haw.) L.Bolus	Carpobrotus juritzii (L.Bolus) L.Bolus, Mesembryanthemum dimidiatum Haw., Mesembryanthemum juritzii L.Bolus		Herb		Perennial									1	1				Native	Chizengane (MP,tswa); Xizengani (MP,rong)	Ornament	MP: Calanga, I.Inhaca, Ponta Torres, Ponta Ponduíni, proximo do Saco da Inhaca, Macaneta, Ponta do Ouro. I: Pomene	TPL, WFO, POWO, GBIF, FZ, FM, LMA, Koning (1993)
Angiosperms	Eudicots	Aizoaceae Martinov	Carpobrotus	Species	Carpobrotus edulis (L.) N.E.Br.	Abryanthemum edule (L.) Rothm., Carpobrotus edulis var. chrysophthalmus C.D.Preston & P.D.Sell, Mesembryanthemum edule L.		Herb		Perennial								1						Introduced			G: Praia de Chongoene	TPL, WFO, POWO, Da Silva et al. (2004), FM
Angiosperms	Eudicots	Aizoaceae Martinov	Delosperma	Species	Delosperma mahonii (N.E.Br.) N.E.Br.	Mesembryanthemum mahonii N.E.Br.		Herb		Perennial									1					Native			I: Homoine	FM, FZ, POWO, TPL, WFO, APD, GBIF, LMA, LMU
Angiosperms	Eudicots	Aizoaceae Martinov	Delosperma	Species	Delosperma tradescantioides (Berg.) L. Bol.	Mesembryanthemum tradescantioides A.Berger		Herb		Perennial										1				Native		Ornament	MP: Mt. M’ponduine, Boane, entre Umbelúzi e Porto Henrique, Porto Henrique	FM, FZ, POWO, TPL, WFO, APD, GBIF, LMA, LMU
Angiosperms	Eudicots	Aizoaceae Martinov	Mesembryanthemum	Species	Mesembryanthemum cordifolium L.f.	Mesembryanthemum tetrasepalum Regel, Aptenia cordifolia (L.f.) Schwantes, Litocarpus cordifolius (L.f.) L.Bolus, Ludolfia cordifolius (L. f.) L. Bolus, Tetracoilanthus cordifolius (L. f.) Rappa & Camarrone		Herb		Perennial										1				Introduced			MP: Sábiè, Mangulane, Moamba	FM, FZ, POWO, TPL, WFO, APD, GBIF, LMA, LMU
Angiosperms	Eudicots	Aizoaceae Martinov	Sesuvium	Species	Sesuvium hydaspicum (Edgew.) Gonç.	Diplochonium uvarioides Edgew., Sesuvium hoepfnerianum Schinz, Sesuvium nyasicum (Baker) Gonç., Trianthema dinteri Engl., Trianthema hydaspicum Edgew., Trianthema nyasicum Baker, Trianthema polyspermum Hochst. ex Oliv., Trianthema salarium Bremek.		Herb	Succulent	Perennial				1										Native			T: Màgoé	POWO, TPL, WFO, FZ, FM
Angiosperms	Eudicots	Aizoaceae Martinov	Sesuvium	Species	Sesuvium portulacastrum (L.) L.	Aizoon canariense Andrews, Aizoon montevidense Spreng. ex Rohr, Halimus maritima Kuntze, Halimus portulacastrum (L.) Kuntze, Psammanthe marina Hance, Pyxipoma polyandrum Fenzl, Sesuvium acutifolium Miq., Sesuvium brevifolium Schumach. & Thonn., Sesuvium distylum Ridl., Sesuvium edule Wight ex Wall., Sesuvium longifolium Humb. & Bonpl. ex Willd., Sesuvium microphylium Willd., Sesuvium ortegae Spre…		Herb	Succulent	Perennial	1		1		1				1	1				Native	Secilii (MP,rong); Serisiri (NP,macu)		I: I.Bazaruto, Pomene. MP: Costa do Sol, Ponta Torres, I.Inhaca, Estaçao de Biologia Maritima, Ponta Rasa. CD: Porto Amélia, Metuge, Bandar. NP: Ilha de Moçambique, Matibane. Z: Maganja da Costa	TPL, WFO, POWO, FM, FZ, GBIF, Koning (1993)
Angiosperms	Eudicots	Aizoaceae Martinov	Sesuvium	Species	Sesuvium sesuvioides (Fenzl) Verdc.	Diplochonium sesuvioides Fenzl, Diplochonium sesuvioides Wawra & Peyr., Halimus sesuviodes (Fenzl) Kuntze, Sesuvium digynum Welw. ex Oliv.		Herb	Succulent	Perennial										1				Native			MP: Costa do Sol	TPL, WFO, POWO, FZ, GBIF, LMA
Angiosperms	Eudicots	Aizoaceae Martinov	Tetragonia	Species	Tetragonia tetragonoides (Pall.) Kuntze	Demidovia tetragonoides Pall., Tetragonia borealis Batt. & Trab., Tetragonia cornuta Gaertn., Tetragonia expansa Murray, Tetragonia expansa var. cornuta (Gaertn.) Endl., Tetragonia inermis F.Muell., Tetragonia japonica Thunb., Tetragonia purpurea Otto ex Sweet, Tetragonia quadricornis Stokes, Tetragonia striata Larrañaga		Herb	Succulent	Perennial								1		1				Introduced			MP: I.Inhaca, Ponta Torres. G: Xai-Xai, Guijá	TPL, WFO, POWO, FM, FZ, GBIF, LMA
Angiosperms	Eudicots	Aizoaceae Martinov	Trianthema	Species	Trianthema mozambiquense H.E.K.Hartmann & Liede			Herb	Unknown											1	E	DD		Native			MP: Matola, de Boana para Porto Henrique	GBIF, LMA, FM, FZ, TPL, WFO, POWO, IUCN Red List, Darbyshire et al. (2019), K
Angiosperms	Eudicots	Aizoaceae Martinov	Trianthema	Species	Trianthema portulacastrum L.	Portulacastrum monogynum Medik., Tetragonia chisimajensis Chiov., Trianthema flexuosum Schumach. & Thonn., Trianthema littorale Cordem., Trianthema monogynum L., Trianthema obcordatum Roxb., Trianthema procumbens Mill., Portulaca axilliflora Blanco, Portulaca toston Blanco		Herb	Succulent	Perennial					1					1				Native	Dlevedleve (MP,tson); Ewiri (NP,macu); Hlava-Hlavane (G,tson); Mudja Nguluve (MP,tson); Muguta (MP,tson); Nikoto, Na'Mwarra-Axefe (NP,macu); Nkorronto-Ntiana (CD,macu)		MP: Umbelúzi, Avenida Marginal, Changalane. Z: Luabo	FM, FZ, POWO, TPL, WFO, GBIF, LMA, Koning (1993)
Angiosperms	Eudicots	Aizoaceae Martinov	Trianthema	Variety	Trianthema salsoloides Fenzl ex Oliv. var. salsoloides	Trianthema multiflorum Peter		Herb	Succulent	Perennial							1	1		1				Native			S: Búzi à Muda, GNP. G: Caniçado. MP: Changalane à Catuane, Umbelúzi to Porto Henrique.	FM, POWO, APD, GBIF, LMA
Angiosperms	Eudicots	Aizoaceae Martinov	Trianthema	Variety	Trianthema triquetrum Willd. ex Spreng. var. triquetrum	Trianthema glandulosum Peter, Trianthema glaucifolium F.Muell., Trianthema sedifolium Vis.		Herb	Succulent	Perennial				1						1				Native			MP: Changalane à Catuane, Catembe. T: R. Zambeze, Macombe.	FM, FZ, POWO, LMU
Angiosperms	Eudicots	Aizoaceae Martinov	Zaleya	Species	Zaleya pentandra (L.) C.Jeffrey	Rocama arabica J.F.Gmel., Rocama digyna DC., Rocama prostrata Forssk., Trianthema pentandrum L., Trianthema sennii Chiov., Zaleya pentandra var. rubra (Blatt. & Hallb.) M.R.Almeida, Zaleya sennii (Chiov.) C.Jeffrey, Limeum kenyense Suess.		Herb	Succulent	Perennial			1	1			1	1		1				Native	Chlava (T,rong); Muchava (MP,rong); Muhlava (G,tson); Xicalandembe (MC,sena)		G: Guijá, Mubanguine, Caniçado. MP: Maputo. S: Chemba. T: Tete. NP: Ilha de Moçambique, Nametil.	FM, FZ, POWO, TPL, WFO, APD, GBIF, LMA, LMU, Koning (1993)
Angiosperms	Monocots	Alismataceae Vent.	Burnatia	Species	Burnatia enneandra Micheli	Burnatia alismatoides Peter, Burnatia alismatoides var. elliptica Peter, Burnatia enneandra var. linearis Peter, Burnatia oblonga Peter, Echinodorus schinzii Buchenau, Rautanenia schinzii (Buchenau) Buchenau		Herb	Aquatic		1		1		1		1	1	1			LC		Native	Mâéufa (Z)		Z: Namacurra. NP: Mutuáli. CD: Montepuez para Namuno, Montepuez. S: Cheringoma. I: Govuro. G: Guijá, Caniçado	GBIF, POWO, IUCN Red List,TPL, WFO, FM, FZ, Koning (1993)
Angiosperms	Monocots	Alismataceae Vent.	Butomopsis	Species	Butomopsis latifolia (D.Don) Kunth	Butomopsis cordofana (Hochst.) Kunth ex Walp., Butomopsis lanceolata (Roxb.) Kunth, Elattosis apetala Gagnep., Tenagocharis alismoides Hochst., Tenagocharis cordofana Hochst., Tenagocharis lanceolata (Roxb.) Baill., Tenagocharis latifolia (D.Don) Buchenau, Butomus lanceolatus Roxb., Butomus latifolius D.Don		Herb		Annual				1								LC		Native			T: Tete.	POWO, IUCN Red List, GBIF, LMA
Angiosperms	Monocots	Alismataceae Vent.	Limnophyton	Species	Limnophyton obtusifolium (L.) Miq.	Alisma kotschyi Hochst., Alisma obtusifolium (L.) Thwaites, Alisma sagittifolium Willd., Alisma sagittifolium Thwaites, Caldesia sagittarioides Ostenf., Dipseudochorion sagittifolium (Willd.) Buchenau, Dipseudochorion sagittifolium Buch., Limnophyton parvifolium Peter, Sagittaria nymphaeifolia Hochst., Sagittaria obtusifolia L.		Herb	Aquatic						1		1	1	1			LC		Native	Ngene'Yaane (I)	Cosmetic, Medicine	G: LNP, Caniçado, Massingir, Massangena, Chiponha. I: Govuro, Mabote para Jofane. S: Macuti. Z: Entre Quelimane e Nicuadala	POWO, IUCN Red List, GBIF, FM, BNRH
Angiosperms	Eudicots	Amaranthaceae Juss.	Achyranthes	Variety	Achyranthes aspera L. var. porphyristachya (Wall. ex Moq.) Hook.f.	Achyranthes mauritiana Moq., Achyranthes porphyristachya Wall. ex Moq., Centrostachys mauritiana (Moq.) Standl.		Herb		Perennial						1								Introduced			MC: Mavita.	POWO, TPL, LMA
Angiosperms	Eudicots	Amaranthaceae Juss.	Achyranthes	Variety	Achyranthes aspera L. var. pubescens (Moq.) M.Gómez	Achyranthes aspera var. nigro-olivacea Suess., Achyranthes aspera var. procera Fiori, Achyranthes aspera var. pubescens (Moq.) C.C. Towns., Achyranthes aspera f. robustiformis Suess., Achyranthes aspera var. virgata (Moq.) Boerl., Achyranthes fruticosa var. pubescens Moq., Achyranthes viridis Lopr.		Herb		Perennial		1	1	1	1	1	1	1		1				Native			NI: Lichinga, Lago Niassa. NP: Nampula. T: Ulónguè. Z: Mt. Mabu, Serra Chiperone, Serra Morrumbala, Milange, Próx. de Sena. S: GNP (Rio Vunduzi, margem oposta do acampamento Bunga; Ao longo da estrada para a vila de Mpawe, Coutada 12, Cheringoma) MC: Báruè à Catandica, Tambara. G: Guijá (margem do R. Limpopo). MP: Entre Matutuíne e Catembe.	Timberlake et al. (2009), FM, FZ, POWO, TPL, WFO, APD, GBIF, LMA, LMU
Angiosperms	Eudicots	Amaranthaceae Juss.	Achyranthes	Variety	Achyranthes aspera L. var. sicula L	Achyranthes aspera var. albissima Suess., Achyranthes aspera f. annulosa Suess., Achyranthes aspera var. argentea (Lam.) Boiss., Achyranthes aspera f. latifolia Suess., Achyranthes aspera f. rubella Suess., Achyranthes aspera f. suffruticosa Fiori, Achyranthes aspera var. viridescens Moq., Achyranthes argentea Lam.,Achyranthes aspera var. argentea (Lam.) C.B. Clarke, Achyranthes sicula (L.) All.,…		Herb		Perennial		1		1	1	1	1			1				Native			NI: Lichinga, Metangula. T: Zomba. Z: Gúruè, Serra Chiperone. S: GNP (Perto da ponte Rio Nhanvu ao longo da estrada do portão de entrada para Chitengo). MC: Reserva Florestal de Moribane. MP: Marracuene.	Timberlake et al. (2009), TPL, WFO, POWO, FM, FZ
Angiosperms	Eudicots	Amaranthaceae Juss.	Achyropsis	Species	Achyropsis gracilis C.C.Towns.			Herb		Annual			1		1					1				Native			MP: Marracuene, Ricatla. NP: Entre Mogincual e Quixaxa. Z: Zambézia.	TPL, WFO, POWO, FM, FZ, GBIF
Angiosperms	Eudicots	Amaranthaceae Juss.	Achyropsis	Species	Achyropsis leptostachya (E.Mey. ex Meisn.) Benth. & Hook.f. ex B.D.Jacks.	Achyranthes leptostachya E.Mey., Achyranthes alba Eckl. & Zeyh. ex Moq., Achyranthes verreauxii Moq., Brandesia alba Mart. ex Moq., Centrostachys alba (Mart.) Standl., Psilotrichum densiflorum Lopr., Achyropsis alba (Eckl. & Zeyh. ex Moq.) Benth. & Hook.f. ex B.D.Jacks, Achyranthes leptostachya E. Mey. ex Meisn.		Herb		Perennial										1				Native	Chilape (MP)		MP: Entre Umbelúzi e Porto Henrique.	FM, FZ, WFO, POWO, GBIF, LMA, Koning (1993)
Angiosperms	Eudicots	Amaranthaceae Juss.	Aerva	Species	Aerva javanica (Burm.f.) Juss. ex Schult.	Achyranthes javanica (Burm.f.) Pers., Iresine javanica Burm.f., Illecebrum javanicum (Burm.f.) L.		Herb		Perennial	1			1	1	1	1	1						Native	Kalala (CD,macu); Panha (MC,sena); Pânha (T)		CD: Pemba, Mecúfi. T: Chicoa, Boroma, Mandie, Sinjal. Z: Muola. S: Chemba (Chiou). MC: Guro, Mungári. G: Massangena.	TPL, WFO, POWO, FM, GBIF, LMA, FZ
Angiosperms	Eudicots	Amaranthaceae Juss.	Aerva	Species	Aerva lanata (L.) Juss.	Achyranthes lanata L., Achyranthes villosa Forssk., Aerva arachnoidea Gand., Aerva incana Suess., Aerva leucura auct. sensu Cufod. non Moq., Aerva mozambicensis Gand., Aerva sansibarica Suess., Amaranthus aervoides Hochst. & Steud. ex A. Rich., Illecebrum lanatum (L.) L.		Herb		Perennial	1		1	1	1	1	1	1		1				Native			CD: Pemba, Ancuabe, Entre Chiúre e Namapa. NP: Goa, Entre Mogincual e Quixaxe. T: Sisitso. Z: Quelimane, Namagoa, Entre Simôgo e Morrumbala. S: Cheringoma (Entre Inhaminga e Pangache), GNP (Lago Urema ). MC: CNR (R. Nhabawa), Penha Longa, Entre Machire e Macoca. G: Entre Lagoa Nova e Chimai. MP: Baía de Maputo.	TPL, WFO, JSTOR, GBIF, LMA, FM, APD
Angiosperms	Eudicots	Amaranthaceae Juss.	Alternanthera	Species	Alternanthera bettzickiana (Regel) G.Nicholson	Achyranthes bettzickiana (Regel) Standl., Achyranthes picta Passarge, Alternanthera amabilis Lem., Alternanthera amabilis var. tricolor Linden & André, Alternanthera amoena (Lem.) Voss, Alternanthera amoena f. amabilis (Lem.) Voss, Alternanthera amoena f. reinhardii Voss, Alternanthera amoena f. rosea Voss, Alternanthera amoena f. sessilis Voss, Alternanthera amoena f. spectabilis Voss, Alternant…		Herb		Perennial		1								1				Introduced			MP: Mavalane. NI: Maniamba.	TPL, WFO, POWO, Da Silva et al. (2004), GBIF, FM, FZ
Angiosperms	Eudicots	Amaranthaceae Juss.	Alternanthera	Species	Alternanthera pungens Kunth	Achyranthes leiantha (Seub.) Standl., Achyranthes lorentzii (Uline) Standl., Achyranthes obovata Pav. ex Moq., Achyranthes repens L., Alternanthera achyrantha R.Br. ex Sweet, Alternanthera achyrantha var. echinata (Sm.) Maiden, Alternanthera achyrantha var. leiantha Seub., Alternanthera achyrantha var. pungens (Kunth) Suess., Alternanthera ciliata Poepp. ex Seub., Alternanthera echinata Sm., Alte…		Herb		Perennial				1			1	1		1				Introduced			MP: Mt. M'Ponduine, Umbelúzi, Chobela, Rua Sacadura Cabral, Marracuene, Benfica, Goba. G: Dumela, Floresta Comunitaria de Munhangane. S: GNP (Várzea do Lago Urema; Ao longo da estrada de Chitengo para o Rio Púnguè). T: Maroeira à Songo.	TPL, WFO, POWO, FM, FZ, GBIF
Angiosperms	Eudicots	Amaranthaceae Juss.	Alternanthera	Species	Alternanthera sessilis (L.) R.Br. ex DC	Alternanthera angustifolia var. macrocephala Domin, Alternanthera angustifolia var. typica Domin, Alternanthera denticulata R.Br., Alternanthera denticulata var. major Moq., Alternanthera denticulata var. micrantha Benth., Alternanthera denticulata var. uliginosa Domin, Alternanthera ficoides P.Beauv., Alternanthera ficoides var. minor P.Beauv., Alternanthera ficoides var. versicolor Lem., Altern…		Herb		Annual		1		1	1		1	1	1	1				Introduced	Chibonze (S,sena); Massôco (T); Mitiniko (NI,yao); Mwiti (CD,macu)	Handicraft	G: Xai-Xai (Rio Limpopo), Lionde, Chiquidela, Massangena, Balule (Lagoa Fuouá). S: Bambala (Chironde Camp à Pista de pouso de Mungári, Coutada 12), GNP (Lago Urema), Beira,Tambara à Mitondo, Sena. T: I. Micune, Cahora Bassa, Mazowe, Chioco (Margens do rio Luia). I: Panda. Z: Namagoa. NI: Amaramba, Cuamba (margens do rio Lúrio). MP: Malanga, Marracuene, I. Inhaca.	FM, FZ, POWO, TPL, WFO, APD, JSTOR, GBIF, LMA, LMU, Koning (1993), Bruschi et al. (2014)
Angiosperms	Eudicots	Amaranthaceae Juss.	Amaranthus	Subspecies	Amaranthus blitum L. subsp. emarginatus (Salzm. ex Uline & Bray) Carretero, Muñoz Garm. & Pedrol	Amaranthus ascendens var. polygonoides (Moq.) Thell., Amaranthus ascendens subsp. polygonoides (Moq.) Thell. ex Priszter, Amaranthus blitum var. emarginatus (Moq. ex Uline & W.L.Bray) Lambinon, Amaranthus emarginatus Salzm. ex Uline & Bray, Amaranthus lividus var. polygonoides (Moq.) Thell., Amaranthus lividus subsp. polygonoides (Moq.) Probst, Amaranthus polygonoides Zoll. ex Moq., Euxolus polyg…		Herb		Annual										1				Introduced			MP: Ilha de Inhaca.	TPL, WFO, POWO, FZ
Angiosperms	Eudicots	Amaranthaceae Juss.	Amaranthus	Species	Amaranthus caudatus L.	Amaranthus abyssinicus L.H.Bailey, Amaranthus alopecurus Hochst. ex A.Br. & C.D.Bouché, Amaranthus cararu Moq., Amaranthus caudatus var. albiflorus Moq., Amaranthus caudatus var. alopecurus Moq., Amaranthus caudatus subsp. mantegazzianus (Pass.) Hanelt, Amaranthus caudatus var. maximus (Mill.) Moq., Amaranthus caudatus subsp. saueri V.Jehlík, Amaranthus dussii Sprenger, Amaranthus edulis Speg., A…		Herb		Annual				1		1	1			1				Introduced	Bononguè (T); Mboamanga (MC,sho)	Food	T: Songo. MC: Mbundi. S: Goonda, Manguiane. MP: Maputo.	FM, FZ, POWO, Da Silva et al. (2004), TPL, WFO, APD, JSTOR, GBIF, LMA, LMU, Koning (1993)
Angiosperms	Eudicots	Amaranthaceae Juss.	Amaranthus	Species	Amaranthus cruentus L.	Amaranthus anacardana Hook.f., Amaranthus arardhanus Sweet, Amaranthus carneus Moq., Amaranthus chlorostachys Moq., Amaranthus esculentus Besser ex Moq., Amaranthus farinaceus Roxb. ex Moq., Amaranthus guadeloupensis Voss, Amaranthus guadelupensis Moq., Amaranthus hybridus subsp. cruentus (L.) Thell., Amaranthus hybridus var. paniculatus (L.) Uline & W.L.Bray, Amaranthus hybridus var. patulus (Be…		Herb		Annual		1		1						1				Introduced			NI: Lichinga. T: Songo. MP: Maputo, Jardim Municipal.	FM, FZ, POWO, TPL, WFO, APD, GBIF, LMA, LMU
Angiosperms	Eudicots	Amaranthaceae Juss.	Amaranthus	Species	Amaranthus dubius Mart. ex Thell.	Amaranthus dubius var. flexuosus Thell., Amaranthus dubius var. leptostachys Thell., Amaranthus dubius var. xanthostachys Thell., Amaranthus tristis Willd., Amaranthus tristis var. flexuosus Moq., Amaranthus tristis var. xanthostachys Moq., Amaranthus dubius var. crassespicatus Suesseng., Amaranthus patulus, Amaranthus tristis sensu Moq.		Herb		Annual	1	1		1	1		1		1	1				Introduced	An'Boa (I); Boa (I,Chop); Bonongué (T); Injéwé (CD,macu); M'Boa (MP,rong); Tseque (MP)	Food, Livestock Fodder, Medicine	CD: Nacuce. NI: Mandimba. S: Rio Save. T: Tete. Z: Namagoa. I: Pomene, Vilanculos, Nhacoongo. MP: Baía de Maputo, 3 de Fevereiro.	FZ, POWO, TPL, WFO, APD, GBIF, LMA, LMU
Angiosperms	Eudicots	Amaranthaceae Juss.	Amaranthus	Subspecies	Amaranthus graecizans L. subsp. silvestris (Vill.) Brenan			Herb		Annual				1			1							Native			S: Chemba, Chiou, GNP (Nhascuvo Ranger Camp). T: Machenga à Gomero.	FM, FZ, POWO, TPL, WFO, APD, GBIF, LMA, LMU
Angiosperms	Eudicots	Amaranthaceae Juss.	Amaranthus	Subspecies	Amaranthus graecizans L. subsp. thellungianus (Nevski) Gusev	Amaranthus angustifolius "proles" polygonoides (Moq.) Thell., Amaranthus blitum var. polygonoides Moq., Amaranthus thellungianus Nevski, Amaranthus thunbergii var. grandifolius Suesseng.		Herb		Annual				1						1				Introduced			T: Panhame. MP: Mt. Inhaca.	GBIF, POWO, TPL, WFO, FM, FZ, LMA
Angiosperms	Eudicots	Amaranthaceae Juss.	Amaranthus	Species	Amaranthus hybridus L.	Amaranthus hybridus subvar. genuinus (Thell.), Carretero Galliaria hybrida (L.) Nieuwl.		Herb		Annual				1		1	1			1				Introduced	Bonongué (T); Chifisi (T,sho); Chikadya Champongo (T,sho); Enyewe (NP,macu); Mba (MC,sho); Mboa Da Horta (X); Mboa Manga (MP,tson); M'Boa (MP,rong); M'Bowa (MP); Mowa (MC,sho); Ntchitcha (CD,macu)		T: Ulónguè. S: Beira. MC: Sussundenga, Machipanda, Chimoio (Campus do Instituto Superior Politécnico de Manica). MP: Namaacha, 3 de Fevereiro.	FM, FZ, POWO, TPL, WFO, APD, GBIF, LMA, LMU, Koning (1993)
Angiosperms	Eudicots	Amaranthaceae Juss.	Amaranthus	Species	Amaranthus spinosus L.	Amaranthus spinosus var. basiscissus Thell., Amaranthus spinosus var. circumscissus Thell., Amaranthus spinosus var. indehiscens Thell., Amaranthus spinosus f. inermis Lauterb. & K.Schum., Amaranthus spinosus var. purpurascens Moq., Amaranthus spinosus var. pygmaeus Hassk., Amaranthus spinosus var. rubricaulis Hassk., Amaranthus spinosus var. viridicaulis Hassk., Galliaria spitosa (L.) Nieuwl.		Herb		Annual		1		1		1	1	1		1				Introduced	Beberele (MP,tson); Bonongwe (T,sho); Bonongwe (Z,lom); Dombe (T); Enyewe (NP,macu); Enyewe (NI,macu); Kariapa (NI,yao); Mboa (I); Mboa (MC); Mboa (MP); Mboa Espinhosa (X); Mboa Manga (MP,rong); Mboa Wa Ming (MC,sho); Mboa Wa Thlava (I,tswa); Mboa Wa Xilungu (MP,tson); Mboa Xilungwe (MP,tson); Mboa Ya Mitwa (MP,tson); Mboamanga (MP,rong); Mbowa (MC,sho); Miboa (MP,rong); Muxaba (MC,sho); Nanthont…		NI: Lichinga. T: Cahora Bassa, Boroma, Ulónguè. S: GNP (Leito do riacho na base do Mt. Bunga, a noroeste do Parque). MC: Machango, Entre Matarara do Lucite e Dombe, Chimoio, Gondola (R. Nhamissenguere; Serração de Braunstein), Sussundenga (Travessia do rio Mutucuto, trilha de Muwawa a Zomba). G: Massingir, Chókwè, Dumela, Xai-Xai, Cais do Rio Limpopo. MP: Ponta Vermelha, Marracuene, Junto ao Muse…	FM, FZ, POWO, TPL, WFO, APD, GBIF, LMA, LMU, Koning (1993)
Angiosperms	Eudicots	Amaranthaceae Juss.	Amaranthus	Species	Amaranthus thunbergii Moq.	Amaranthus albus Thunb.		Herb		Annual								1	1	1				Native	Itege (MP,rong); Mboa (G); Mboa (I); Mboa (MC); Mboa (MP,rong); Mboa (S,sena); Mboa Wa Xilandim (MP,tson); Moa (S,sho); Mutchingandzaka (I,tswa); Poa(G,tson); Tsekhe (MP,tson)		I: Nhacoongo. G: Xai-Xai, Dumela, Guijá (Missão de São Vicente de Paula). MP: I. Inhaca, Magude.	FM, FZ, POWO, TPL, WFO, APD, GBIF, LMA, LMU, Koning (1993)
Angiosperms	Eudicots	Amaranthaceae Juss.	Amaranthus	Species	Amaranthus viridis L.	Albersia caudata (Jacq.) Boiss., Albersia gracilis (Desf.) Webb & Berthel., Albersia polystachya (Willd.) Kunth, Amaranthus fasciatus Roxb., Amaranthus polystachyus Willd., Chenopodium caudatum Jacq., Euxolus caudatus var. gracilis Moq., Euxolus caudatus var. maximus Moq., Euxolus polystachyus (Willd.) Miq., Euxolus viridis (L.) Moq., Galliaria adscendens Bubani, Glomeraria viridis (L.) Cav., Pyx…	Euxolus caudatus (Jacq.) Moq.	Herb		Annual			1	1					1	1				Introduced	Mboa (I,tswa); Nyewe (Z)	Food	NP: Angoche. T: Tete à Cahora Bassa. I: Nhacoongo. MP: Cidade de Maputo (Jardim Particular).	FM, FZ, POWO, TPL, WFO, APD, GBIF, LMA, LMU, Koning (1993)
Angiosperms	Eudicots	Amaranthaceae Juss.	Atriplex	Species	Atriplex halimus L.	Atriplex halimoides Tineo, Atriplex halimus var. serrulata (Pau) Alcaraz, Garre & Sánchez-Gómez, Atriplex kataf Ehrenb. ex Boiss., Atriplex serrulata Pau, Chenopodium halimus (L.) Thunb., Obione halimus (L.) G.L.Chu, Schizotheca halimus (L.) Fourr.		Herb		Perennial								1		1				Native			G: De Nalázi à Manjacaze, por Alto Changane e Chibuto. MP: Costa do Sol.	FM, FZ, POWO, TPL, WFO, APD, GBIF, LMA, LMU
Angiosperms	Eudicots	Amaranthaceae Juss.	Bassia	Species	Bassia indica (Wight) A.J.Scott	Bassia joppensis Bornm. & Dinsm., Kochia indica Wight, Kochia scoparia subsp. indica (Wight) Aellen		Herb		Annual										1				Introduced			MP: Marracuene (Depois da ponte junto ao restaurante Costa do Sol).	POWO, TPL, APD, LMA
Angiosperms	Eudicots	Amaranthaceae Juss.	Caroxylon	Species	Caroxylon littoralis (Moq.) Akhani & Roalson	Salsola littoralis Moq., Salsola littoralis var. glabra Botsch.		Herb		Perennial									1		NE			Native			I: Vilanculos.	FM, FZ, POWO, TPL, WFO, APD, GBIF, LMA, LMU, Darbyshire et al. (2019), K
Angiosperms	Eudicots	Amaranthaceae Juss.	Celosia	Species	Celosia anthelminthica Asch.	Celosia acroporoides Hochst. ex Baker & C.B.Clarke, Celosia digyna var. cordata Suess., Celosia acroprosodes Hochst., Celosia intermedia Hochst. (1875)		Herb		Perennial			1														NP: Liúpo.	POWO, TPL, WFO, APD, LMA
Angiosperms	Eudicots	Amaranthaceae Juss.	Celosia	Species	Celosia argentea L.	Amaranthus cristatus (L.) Noronha, Amaranthus huttonii H.J.Veitch, Amaranthus pyramidalis Noronha, Celosia argentea var. cristata (L.) Kuntze, Celosia argentea f. cristata (L.) Schinz, Celosia argentea var. margaritacea (L.) Iamonico, Celosia argentea var. mumbaiana M.R.Almeida, Celosia aurea J.Dix, Celosia castrensis L., Celosia cernua Roxb., Celosia cernua Andrews, Celosia coccinea L., Celosia …		Herb		Annual			1							1				Introduced			NP: Malema (margens do R. Nalume). MP: Namaacha.	APD, POWO, Da Silva et al. (2004), LMA
Angiosperms	Eudicots	Amaranthaceae Juss.	Celosia	Species	Celosia nervosa C.C.Towns.			Herb		Perennial			1						1	1	E	DD		Native			NP: Liúpo. I: Panda. MP: Maputo, Santaca à Catuane.	TPL, WFO, POWO, IUCN Red List, GBIF, FZ, FM, Darbyshire et al. (2019), K
Angiosperms	Eudicots	Amaranthaceae Juss.	Celosia	Species	Celosia pandurata Baker	Celosia cuneifolia Baker		Herb		Annual					1		1				E			Native			Z: Morrumbala, R. Zambeze, R. Shire, Shigogo. S: Gorongosa, Cheringoma, Chupanga, Inhamitanga.	TPL, WFO, POWO, GBIF, FZ, FM, LMA, Darbyshire et al. (2019), K
Angiosperms	Eudicots	Amaranthaceae Juss.	Celosia	Species	Celosia patentiloba C.C.Towns			Herb		Annual	1																CD: Mueda.	TPL, POWO, APD, K
Angiosperms	Eudicots	Amaranthaceae Juss.	Celosia	Species	Celosia schweinfurthiana Schinz	Celosia oblongocarpa Schinz, Celosia schweinfurthiana var. sansibariensis Schinz		Herb		Perennial							1							Native			S: Inhamitanga à Chupanga.	TPL, WFO, POWO, GBIF, FZ, FM, LMA
Angiosperms	Eudicots	Amaranthaceae Juss.	Celosia	Species	Celosia trigyna L.	Celosia acroprosoides Hochst. ex Oliv., Celosia adoensis Hochst. ex A.Rich., Celosia digyna Suess., Celosia laxa Schumach. & Thonn., Celosia loandensis sensu Suesseng. ex Brenan, Celosia melanocarpos Poir., Celosia minutiflora Baker, Celosia semperflorens Baker, Celosia trigyna var. adoensis Moq., Celosia trigyna var. convexa Suesseng., Celosia trigyna var. longistyla subvars. convexa Suess. et b…		Herb		Annual	1	1	1	1	1	1	1	1	1	1				Native	Enyewe (Tipo De) (CD,macu); nyamudjakara (MC,sho); N'Hampara (NP,macu)		CD: Ancuabe, Rio Unculo. NI: Massangulo, Unango, rio Lúrio, Maniamba. NP: Hospital Psiquiátrico de Nampula, Entre Mogincual e Quixaxe. T: Rio Sanangoé - Maroeira, Cahora Bassa, Ulónguè. MC: Zembe, Reserva Florestal de Moribane ao R. Révuè, Munhinga à Dombe, Mts Chimanimani, Chimoio à Catandic, Serra Mocuta, Gondola. Z: Jagarra, Namagoa. S: GNP, Tumba, Beira, Espungabera, Inhaminga à Amatongas. I:…	Müller et al. (2012), TPL, WFO, POWO, GBIF, FM, FZ, LMA, Koning (1993), K, Wursten et al. (2017)
Angiosperms	Eudicots	Amaranthaceae Juss.	Centema	Species	Centema subfusca (Moq.) T.Cooke	Pupalia subfusca Moq.		Herb		Perennial								1		1				Native			G: Entre Magul e Motaze. MP: Umbelúzi, Moamba à Boane, Catuane, Goba à Catuane.	FM, FZ, POWO, TPL, WFO, APD, GBIF, LMA, LMU
Angiosperms	Eudicots	Amaranthaceae Juss.	Centemopsis	Species	Centemopsis conferta (Schinz) Suess.	Achyranthes conferta Schinz, Achyropsis conferta (Schinz) Schinz, Centrostachys conferta (Schinz) Standley, Psilotrichum confertum (Schinz) C.B. Clarke		Herb		Annual			1		1									Native			NP: Serra Chinga. Z: Milange à Molumbo.	FM, FZ, POWO, TPL, WFO, APD, GBIF, LMA, LMU
Angiosperms	Eudicots	Amaranthaceae Juss.	Centemopsis	Species	Centemopsis gracilenta (Hiern) Schinz	Achyropsis oxyuris Suess. & Overk., Centema gracilenta Hiern, Centemopsis myurus Suess., Psilotrichum gracilentum C.B.Clarke		Herb		Annual		1				1								Native			NI: Mendone (?). MC: Rio Mucrera à rio Mevumozi, Mts Chimanimani.	FM, FZ, POWO, TPL, WFO, APD, GBIF, LMA, LMU, Wursten et al. (2017)
Angiosperms	Eudicots	Amaranthaceae Juss.	Centemopsis	Species	Centemopsis kirkii (Hook.f.) Schinz	Achyranthes breviflora Baker, Centema kirkii Hook.f., Centema rubra Lopr., Centemopsis clausii Schinz, Centemopsis rubra (Lopr.) Schinz, Centrostachys breviflora (Baker) Standl.		Herb		Annual		1		1						1				Native			NI: Metangula. T: Nhaluiro. MP: Boane, Estação grária de Umbelúzi, Salamanga (Quinta das pedras).	FM, FZ, POWO, TPL, WFO, APD, GBIF, LMA, LMU
Angiosperms	Eudicots	Amaranthaceae Juss.	Centrostachys	Species	Centrostachys aquatica (R.Br.) Moq.	Achyranthes aquatica R.Br., Achyranthes trichotoma Perr. ex Moq., Centrostachys aquatica (R. Br.) Wall., Centrostachys flabelligera Fenzl ex Moq.		Herb		Perennial												LC		Native			Locality not known.	POWO, TPL, APD, IUCN Red List
Angiosperms	Eudicots	Amaranthaceae Juss.	Chenolea	Species	Chenolea diffusa Thunb.	Bassia diffusa (Thunb.) Kuntze, Caroxylon canescens (Moq.) Akhani & Roalson, Chenopodium sericeum (Aiton) Spreng., Echinopsilon diffusus (Thunb.) Moq., Echinopsilon sericeus (Aiton) Moq., Kochia sericea (Aiton) Schrad., Salsola canescens Desf., Salsola diffusa Thunb., Salsola sericea Aiton		Herb	Succulent	Perennial	1								1	1				Native			CD: Morebue à Montepuez. I: Baía de Inhambane. MP: Marracuene, I. Inhaca, Matutuíne.	FZ, POWO, TPL, WFO, APD, GBIF, LMA, LMU
Angiosperms	Eudicots	Amaranthaceae Juss.	Chenopodium	Species	Chenopodium album L.	Atriplex alba (L.) Crantz, Botrys albus (L.) Nieuwl.		Herb		Annual								1		1				Introduced			G: Entre Magude e Mucatine, Chibuto, Xai-Xai (Rio Limpopo). MP: Catembe, Moamba, Munhuana.	FM, FZ, POWO, TPL, WFO, APD, GBIF, LMA, LMU
Angiosperms	Eudicots	Amaranthaceae Juss.	Chenopodium	Species	Chenopodium giganteum D.Don	Atriplex bengalensis Lam., Chenopodium amaranticolor (H.J.Coste & A.Reyn.) H.J.Coste & A.Reyn., Chenopodium bengalense (Lam.) Spielm. ex Steud., Chenopodium centrorubrum (Makino) Nakai, Chenopodium elegantissimum Koidz., Chenopodium formosanum Koidz., Chenopodium hookerianum Moq., Chenopodium mairei H.Lév., Chenopodium rubricaule Schrad. ex Moq.		Herb		Annual										1				Introduced			MP: Ilha de Inhaca.	FM, FZ, POWO, TPL, WFO, APD, GBIF, LMA, LMU
Angiosperms	Eudicots	Amaranthaceae Juss.	Chenopodium	Species	Chenopodium opulifolium Schrad. ex W.D.J.Koch & Ziz	Anserina opulifolia (Schrad. ex Koch & Ziz) Montandon, Chenopodium album subsp. opulifolium (Schrad. ex W.D.J.Koch & Ziz) Batt., Chenopodium album var. opulifolium (Schrad. ex W.D.J.Koch & Ziz) G.Mey., Chenopodium album subsp. opulifolium (Schrad. ex W.D.J. Koch & Ziz) Maire, Chenopodium album f. viride (L.) Aellen, Chenopodium opulifolium subsp. orientale Murr, Chenopodium opulifolium subsp. uga…	Vulvaria opulifolia Bubani	Herb		Annual								1		1				Native			G: Maniquenique, Mubanguine. MP: Goba Fronteira, Magude.	FM, FZ, TPL, WFO, POWO, APD, JSTOR, GBIF, LMA
Angiosperms	Eudicots	Amaranthaceae Juss.	Cyathula	Species	Cyathula cylindrica Moq.	Achyranthes cylindrica Bojer ex Moq., Cyathula albida Lopr., Cyathula distorta (Hiern) C.B.Clarke, Cyathula mannii Baker, Cyathula schimperiana Moq., Desmochaeta distorta Hiern, Pandiaka cylindrica (Moq.) B.D.Jacks., Pupalia alopecurus Fenzl ex Moq., Pupalia huillensis Hiern, Pupalia schimperiana Hochst., Trichinium latifolium E.Mey. ex Moq.		Herb		Perennial				1	1	1	1			1				Native			T: Mt. Zóbuè. Z: Mt. Namuli. S: Serra Gorongosa (Cavalo, Sanjunjira). MC: Rio Mevumozi, Mts Chimanimani. MP: I. Inhaca, REM.	Timberlake et al. (2009), FM, POWO, TPL, WFO, GBIF, LMA, LMU, Wursten et al. (2017)
Angiosperms	Eudicots	Amaranthaceae Juss.	Cyathula	Species	Cyathula divulsa Suess.			Herb	Unknown							1								Native			MC: Floresta Garuso.	FM, POWO, TPL, WFO, GBIF, LMA, JSTOR, K
Angiosperms	Eudicots	Amaranthaceae Juss.	Cyathula	Species	Cyathula lanceolata Schinz	Cyathula crispa Schinz, Cyathula deserti (N.E.Br.) Suess., Cyathula hereroensis Schinz, Cyathula lanceolata var. scabrida Schinz, Cyathula merkeri Gilg, Cyathula strigosa Suess., Cyphocarpa kuehlweiniana Peter, Pandiaka lanceolata C.B. Clarke, Pandiaka wildii Suess.	Pandiaka deserti N.E.Br., Sericocomopsis lanceolata (Schinz) Peter	Herb		Perennial								1		1				Native			G: Zinave à Banhine. MP: Moamba, Maele, Sábiè, Cabeça de Elefante (Porto Herinque).	TPL, WFO, POWO, APD, JSTOR, FZ, GBIF, LMA, FM
Angiosperms	Eudicots	Amaranthaceae Juss.	Cyathula	Species	Cyathula natalensis Sond.	Cyathula spathulata Schinz, Cyathula spathulifolia Lopr., Pupalia natalensis Sond.		Herb		Perennial						1		1	1	1				Native	Chinamana (X,rong); Chitotuane (G); Nama (G); Sinamani Nkula (MP); Stotoane (G); Stotoane (MP,rong); Unama (G); Unama (I,tswa)	Medicine	MC: Maringué, rio Save. I: Jangamo. G: Entre Chibuto e Alto Changane, Bilene, Coolela, Chibuto à Manjacaze. MP: Moamba à Pessene, Porto Henrique, Manhiça à Calanga, Santaca, Munguine.	FM, FZ, POWO, TPL, WFO, APD, GBIF, LMA, LMU, Koning (1993), Bandeira et al. (2001), Conde et al. (2014), Krog et al. (2006)
Angiosperms	Eudicots	Amaranthaceae Juss.	Cyathula	Species	Cyathula orthacantha (Hochst. ex Asch.) Schinz	Cyathula kilimandscharica Suess. & Beyerle, Cyphocarpa orthacantha (Hochst. ex Asch.) C.B.Clarke, Cyathula orthacanthoides Suess., Pupalia erecta Suess., Pupalia orthacantha Hochst. ex Asch., Kyphocarpa orthacantha (Hochst. ex Aschers.) C.B. Clarke		Herb		Annual				1										Native			T: Sisitso, Chicoa, Mágoè.	FM, POWO, TPL, WFO, GBIF, LMA, JSTOR
Angiosperms	Eudicots	Amaranthaceae Juss.	Cyathula	Species	Cyathula prostrata (L.) Blume	Achyranthes prostrata L., Desmochaeta prostrata (L.) DC., Pupalia prostrata (L.) Mart.		Herb		Perennial						1	1	1	1					Native			S: Cheringoma. MC: Garuso, Mt. Chiancanhi. I: Pomene. G: Xai-Xai (próx. da Praia Sepúlveda).	POWO, TPL, WFO, APD, GBIF, LMA, LMU
Angiosperms	Eudicots	Amaranthaceae Juss.	Cyathula	Species	Cyathula uncinulata (Schrad.) Schinz	Achyranthes globulifera Bojer ex Moq., Achyranthes uncinulata Schrad., Alternanthera lappulacea Schltdl. ex Moq., Cyathula globulifera Moq., Cyathula globulifera var. abyssinica Moq., Cyathula uncinulata var. ceylanica Cavaco, Cyathula uncinulata var. pleiocephala Suess.		Herb		Perennial				1		1				1				Native	Tchimate (T,seng)		T: Planalto de Anǵonia, Metengobalame, Rio Lifidzi. MC: Mavita, Messambuzi para as quedas do rio Rotanda. MP: I. Inhaca.	FM, POWO, TPL, WFO, GBIF, LMA, JSTOR
Angiosperms	Eudicots	Amaranthaceae Juss.	Cyphocarpa	Species	Cyphocarpa angustifolia (Moq.) Lopr.	Cyathula angustifolia Moq., Cyphocarpa wilmsii Lopr., Cyphocarpa zeyheri (Moq.) Lopr., Dasycalyx zeyheri (Moq.) F.Muell., Sericocoma angustifolia (Moq.) Hook.f., Sericocoma hereroensis Suess. & Beyerle, Sericocoma zeyheri (Moq.) Engl., Trichinium zeyheri Moq.		Herb		Annual				1				1	1	1				Native			T: Entre Estima e Inhacapirire. I: Inhambane. G: Guijá à Mabalane (Lago Mefucué), Massingir. MP: Chobela, Marracuene, Matola-Rio, Mangulane, Umbelúzi, Entre Impaputo e Goba.	FM, POWO, TPL, WFO, GBIF, LMA, JSTOR
Angiosperms	Eudicots	Amaranthaceae Juss.	Digera	Species	Digera muricata (L.) Mart.	Achyranthes alternifolia L., Achyranthes ciliata Lam., Achyranthes digera Poir., Achyranthes muricata L., Achyranthes polygonoides Retz., Amaranthus arvensis (Forssk.) E.H.L.Krause, Celosia muricata Spreng., Chamissoa arabica Spreng., Chamissoa ciliata Spreng., Chamissoa commutata Spreng., Chamissoa muricata (L.) Spreng., Cladostachys alternifolia Sweet, Cladostachys arborescens D.Dietr., Cladost…		Herb		Annual								1	1								I: Govuro. G: Caniçado (Mabalane à Combomune, Baixo Limpopo).	POWO, TPL, APD, GBIF
Angiosperms	Eudicots	Amaranthaceae Juss.	Dysphania	Species	Dysphania ambrosioides (L.) Mosyakin & Clemants	Ambrina ambrosioides (L.) Spach, Ambrina ambrosioides var. anthelmintica (L.) Moldenke, Ambrina anthelmintica (L.) Spach, Ambrina incisa Moq., Ambrina parvula Phil., Ambrina spathulata Moq., Atriplex ambrosioides (L.) Crantz, Atriplex ambrosioides f. minus Aellen, Atriplex anthelmintica (L.) Crantz, Blitum ambrosioides (L.) Beck, Botrys ambrosioides (L.) Nieuwl., Botrys anthelmintica (L.) Nieuwl.…		Herb		Annual		1	1	1		1	1	1		1				Introduced			NI: Marrupa à Nungo. NP: Lalaua (entre Umpuhua e o Muage, na margem do rio Neoce). T: Tundumula, Maroeira-Bucha-Rio Zambeze, Ulónguè (leito do rio Lifidzi). S: Chitengo (margem do rio Púnguè). MC: CNR, Chimoio, Rio Nhamawa. S: GNP, Rio Vunduzi, Serra Xiluvo. G: Aldeia da Barragem. MP: Maputo.	FM, POWO, TPL, WFO, GBIF, LMA, JSTOR
Angiosperms	Eudicots	Amaranthaceae Juss.	Dysphania	Species	Dysphania procera (Hochst. ex Moq.) Mosyakin & Clemants	Chenopodium procerum Hochst. ex Moq., Chenopodium suberifolium Murr		Herb		Annual		1												Native			NI: Lichinga.	FM, FZ, POWO, TPL, WFO, APD, GBIF, LMA, LMU
Angiosperms	Eudicots	Amaranthaceae Juss.	Dysphania	Species	Dysphania schraderiana (Schult.) Mosyakin & Clemants	Ambrina graveolens (Lag. & Rodr.) Moq., Botrydium schraderi Spach, Chenopodium effusum M.Martens & Galeotti, Chenopodium graveolens Lag. & Rodr., Chenopodium quercifolium Moq., Chenopodium schraderianum Schult., Chenopodium trilobatum Moq., Neobotrydium foetidum M.L.Zhang & G.L.Chu, Neobotrydium graveolens (Lag. & Rodr.) M.L.Zhang & G.L.Chu, Neobotrydium schraderianum (Schult.) M.L.Zhang & G.L.Ch…		Herb		Annual		1												Introduced			NI: Maniamba.	FM, FZ, POWO, Da Silva et al. (2004), TPL, WFO, APD, JSTOR, GBIF, LMA, LMU
Angiosperms	Eudicots	Amaranthaceae Juss.	Gomphrena	Species	Gomphrena celosioides Mart.	Gomphrena alba Peter, Gomphrena celosioides var. aureiflora Stuchlík, Gomphrena celosioides f. aureiflora (Chodat) Pedersen, Gomphrena celosioides f. grandifolia Stuchlík, Gomphrena celosioides f. parvifolia Stuchlík, Gomphrena celosioides f. suberecta Stuchlík, Gomphrena celosioides f. villosa Suess., Gomphrena decumbens Jacq., Gomphrena decumbens f. albiflora Chodat, Gomphrena decumbens var. al…		Herb		Perennial			1	1	1	1	1	1		1				Introduced			NP: Eráti, Monapo, Mossuril, Iapala. T: Tete. S: Beira, GNP (Chitengo, Lago Urema). Z: Namagoa. MC: Entre Dombe e Sanguene. G: Xai-Xai, Rio Limpopo, Baixo Limpopo, Inhamissa, Chifucaze. MP: Maputo, Marracuene (Entre Ponta do Mar e Costa do Sol), I. Inhaca, Catembe, Estaçõ Agrária de Umbelúzi.	FM, FZ, POWO, TPL, WFO, APD, GBIF, LMA, LMU
Angiosperms	Eudicots	Amaranthaceae Juss.	Gomphrena	Species	Gomphrena globosa L.	Amaranthoides globosa (L.) M.Gómez, Amaranthoides globosus M. Gómez, Amaranthoides globosus var. albiflorus M. Gómez, Gomphrena eriopoda Gillies ex Moq., Gomphrena globosa var. albiflora Moq., Gomphrena globosa var. aureiflora Stuchlik, Gomphrena globosa var. carnea Moq., Gomphrena rubra Moq., Gomphrena tumida Seidl ex Opiz, Xeraea globosa (L.) Kuntze		Herb		Annual		1				1				1				Introduced			NI: Litunde, Marrupa. MC: Maringué, rio Save. MP: Jardim Botânico Tunduru.	FM, FZ, POWO, TPL, WFO, APD, GBIF, LMA, LMU
Angiosperms	Eudicots	Amaranthaceae Juss.	Gomphrena	Species	Gomphrena martiana Gillies ex Moq.	Gomphrena argentina Seub., Gomphrena glutinosa R.E.Fr., Gomphrena martiana f. austrina Pedersen, Gomphrena martiana var. glutinosa (R.E.Fr.) Pedersen, Gomphrena martiana var. microcephala Suess., Iresine chenopodioides Chodat, Philoxerus heliotropifolium Griseb., Xeraea argentina (Seub.) Kuntze, Xeraea martiana (Gillies ex Moq.) Kuntze		Herb		Perennial										1				Introduced			MP: Polana, Arredores do Quartel da Cidade de Maputo	FM, FZ, POWO, TPL, WFO, APD, GBIF
Angiosperms	Eudicots	Amaranthaceae Juss.	Gomphrena	Species	Gomphrena serrata L.	Achyranthes ternata Host ex Fisch., C.A.Mey. & Avé-Lall., Amaranthoides decumbens (Jacq.) M.Gómez, Celosia decumbens Moq., Celosia procumbens Moq., Celosia prostrata Moq., Gomphrena argentea Moq., Gomphrena bicolor Moq., Gomphrena decumbens f. lanceolata Stuchlík, Gomphrena decumbens f. magnifolia Stuchlík, Gomphrena decumbens var. pringlei Stuchlík, Gomphrena diffusa Pav. ex Moq., Gomphrena disp…		Herb		Annual							1			1				Introduced			S: Beira. MP: Marracuene (Bachite).	POWO, GBIF
Angiosperms	Eudicots	Amaranthaceae Juss.	Guilleminea	Species	Guilleminea densa (Willd. ex Schult.) Moq.			Herb		Perennial						1		1		1				Introduced			MC: Vila Manica, Albufeira de Chicamba, Nanvura, Machipanda, Inchope. G: Praia de Chongoene. MP: Jardim Botânico Tunduru, Rua Sacadura Cabral, Chamanculo.	FM, FZ, POWO, TPL, WFO, APD, GBIF, LMA
Angiosperms	Eudicots	Amaranthaceae Juss.	Hermbstaedtia	Variety	Hermbstaedtia odorata (Burch. ex Moq.) T.Cooke var. albi-rosea Suess.			Herb		Perennial								1						Native			G: Mabalane.	JSTOR, FM
Angiosperms	Eudicots	Amaranthaceae Juss.	Hermbstaedtia	Variety	Hermbstaedtia odorata (Burch. ex Moq.) T.Cooke var. aurantiaca C.C. Towns.	Hermbstaedtia elegans var. aurantiaca Suess., Hermbstaedtia quintasii Gand.		Herb		Perennial										1				Native			MP: Goba, Bela Vista (Serração Portugal), Catembe à Mogazine, Marracuene.	POWO, GBIF, TPL, APD, FM
Angiosperms	Eudicots	Amaranthaceae Juss.	Hermbstaedtia	Variety	Hermbstaedtia odorata (Burch. ex Moq.) T.Cooke var. odorata	Celosia recurva Burch., Hermbstaedtia dammarensis C.B.Clarke, Hermbstaedtia elegans Moq., Hermbstaedtia laxiflora Lopr., Hermbstaedtia recurva (Burch.) C.B.Clarke, Hermbstaedtia rubromarginata C.H.Wright, Hermbstaedtia tetrastigma Suess., Hermbstaedtia transvaalensis Gand., Hermbstaedtia transvaalensis Lopr., Lestibudesia recurva (Burch.) Moq.		Herb		Perennial							1	1		1				Native	Chingafumana (MP,rong); Chingarafumana (MP); Chomeli (G,tson); Ntxomeli (G,tson); Xingalafumana (MP,rong)		S: Búzi, Muda. G: Mabalane, Massingir, LNP. MP: INAMAR, Machava, Entre Boane e Moamba, Ponta Vermelha, Macaene, Porto Herinque, Moamba, Matola-Gare, Entre Catembe e Mogazine, Infulene, Ressano Garcia, Polana, Tinonganine, Polana, Pateque.	APD, POWO, GBIF, LMA, Koning (1993)
Angiosperms	Eudicots	Amaranthaceae Juss.	Kyphocarpa	Species	Kyphocarpa angustifolia (Moq.) Lopr.			Herb		Annual				1			1		1	1				Native	Chikwetane (I,tswa)		T: Moatize, Zóbuè, Mt. Caroeira. S: Sena. I: Zavala à Inharrime. MP: Mangulane.	FM, FZ, TPL, WFO, APD, GBIF, LMA, LMU
Angiosperms	Eudicots	Amaranthaceae Juss.	Nothosaerva	Species	Nothosaerva brachiata (L.) Wight	Achyranthes brachiata L., Aerva brachiata (L.) Mart., Aerva chenopodiifolia Bojer, Amaranthus minutus Lesch. ex Moq., Illecebrum brachiatum (L.) L., Pseudanthus brachiatus (L.) Wight		Herb		Annual							1	1	1					Native			S: GNP (Floresta de Area), Maringué. I: Govuro, Jofane à Tessolo. G: Massangena, Mabalane à Mabuiapanse, Massingir para as margans do Rio Shingwidzi.	FM, FZ, POWO, TPL, WFO, APD, GBIF, LMA, LMU
Angiosperms	Eudicots	Amaranthaceae Juss.	Ouret	Species	Ouret leucura (Moq.) Kuntze	Aerva ambigua Moq., Aerva burchellii Moq., Aerva edulis Suess., Aerva leucura Moq., Aerva leucura var. subscandens Hauman, Aerva leucura var. lanatoides Suesseng.		Herb		Perennial		1		1	1		1			1				Native	Nhacapenha (MC,sho); Tchoombere (T,sho)	Food, Handicraft	MP: Porto Henrique. S: Catapu (Santove), GNP (Chitengo, Mueredzi). NI: Lago Niassa. T: Mágoè. Z: Mopeia, Águas Quentes.	FM, FZ, POWO, TPL, WFO, APD, GBIF, LMA, LMU, Koning (1993)
Angiosperms	Eudicots	Amaranthaceae Juss.	Pandiaka	Species	Pandiaka rubrolutea (Lopr.) C.C.Towns.	Achyranthes rubrolutea Lopr., Pandiaka andongensis Hiern		Herb		Annual			1											Native			NP: Meconta, Corrane à Liúpo.	FM, FZ, POWO, TPL, WFO, APD, GBIF, LMA, LMU
Angiosperms	Eudicots	Amaranthaceae Juss.	Psilotrichum	Species	Psilotrichum scleranthum Thwaites	Psilotrichum africanum Oliv., Psilotrichum africanum var. debile Schinz, Psilotrichum concinnum Baker, Psilotrichum trichophyllum Baker		Herb		Perennial	1			1	1	1	1	1		1				Native	Kuntanahé (NP,macu)		CD: Pemba (próx. de Ancuabe). T: Cahora Bassa, Entre Desfiladeiro de Lupata e Tete. Z: Chamo (perto da foz do Rio Zambeze), Inhassunge, Milange, Serra Chiperone, Namagoa, Entre o Alto Molócuè e o cruzamento para o Ile. S: Serra Xiluvo, GNP (Mueredze), Inhamitanga, Cavalo (margem esquerda do rio Vunduzi). MC: Serra Nharo-Nharo, Gondola (Serração de Braunstein), Gogói (margem direita do R. Dacata),…	FM, FZ, POWO, TPL, WFO, APD, GBIF, LMA, LMU, Koning (1993), K
Angiosperms	Eudicots	Amaranthaceae Juss.	Psilotrichum	Species	Psilotrichum sericeum (J.Koenig ex Roxb.) Dalzell	Achyranthes sericea J.Koenig ex Roxb., Psilostachys boiviniana Baill., Psilostachys filipes Baill., Psilostachys kirkii Baker, Psilostachys nervulosa Baill., Psilostachys sericea (J.Koenig ex Roxb.) Hook.f., Psilotrichum axillare C.B.Clarke, Psilotrichum boivinianum (Baill.) Cavaco, Psilotrichum edule C.B.Clarke, Psilotrichum kirkii (Baker) C.B.Clarke, Psilotrichum sericeovillosum Chiov.		Herb		Annual			1					1	1	1				Native	Chingumato Va (Mp ,rong); Khondze (I,tong); Tchipeluwane (I,tswa); Ugimudyakumda (I,tong); Xipewulane (I,tswa)		NP: Ilha de Moçambique. I: Cidade de Inhambane. G: 5 km a sul de Chidenguele. MP: Marracuene à Abel Jafar, Costa do Sol, Mahotas, Matutuíne (aldeia comunal ''Josina Machel''), Centro Hípico de Maputo (na Avenida Moçambique junto ao Zoo).	FM, FZ, POWO, TPL, WFO, APD, GBIF, LMA, LMU, Koning (1993), BNRH
Angiosperms	Eudicots	Amaranthaceae Juss.	Pupalia	Species	Pupalia grandiflora Peter			Herb		Perennial			1											Native			NP: Serra Inago.	FM, FZ, POWO, TPL, WFO, APD, GBIF, LMA, LMU
Angiosperms	Eudicots	Amaranthaceae Juss.	Pupalia	Variety	Pupalia lappacea (L.) Juss. var. argyrophylla C.C.Towns.			Herb		Annual			1									LC	Requiring to add Mozambique in the geographic range	Native			NP: Meconta à Corrane.	FM, FZ, POWO, IUCN Red List, TPL, WFO, APD, JSTOR, GBIF, LMA, LMU
Angiosperms	Eudicots	Amaranthaceae Juss.	Pupalia	Variety	Pupalia lappacea (L.) Juss. var. glabrescens C.C.Towns.			Herb		Annual			1									LC		Native			NP: I. Goa.	FM, FZ, POWO, IUCN Red List, TPL, WFO, APD, JSTOR, GBIF, LMA, LMU
Angiosperms	Eudicots	Amaranthaceae Juss.	Pupalia	Variety	Pupalia lappacea (L.) Juss. var. lappacea	Achyranthes atropurpurea Lam., Achyranthes echinata Retz., Achyranthes patula L.f., Achyranthes styracifolia Lam., Amaranthus arctioideus Perr. ex Moq., Codivalia patula (L.f.) Raf., Desmochaeta atropurpurea DC., Desmochaeta flavescens DC., Desmochaeta patula (L.f.) Schult., Desmochaeta sanguinolenta Link, Desmochaeta xanthioides A.Braun, Pupalia atropurpurea Moq., Pupalia echinata Juss. ex Steud…		Herb		Annual	1		1	1		1	1	1	1	1				Native	Anamani (MP,rong); Chinamana (MP); Chinamane (MP,rong); Munama (S); Shinamani (MP,rong); Wunama (I,tswa)		CD: Foz do R. Rovuma. NP: Memba à Nacala, Serra Inago, Farol de Sangage. T: Cahora Bassa, Entre Desfiladeiro de Lupata e Tete. S: Chemba (Chiou), Inhamitanga. MC: Serra Chindaza, Entre Dombe e Matarara do Lucite. I: Massinga, Mambone (margens do rio Save), Vilanculos, Banamana à Machaíla. G: Mabalane à Balule, Floresta Sagrada de Chirindzene, Barra do Limpopo à Gumbe, Chongoene, Xai-Xai (próx. da…	FM, FZ, POWO, APD, JSTOR, GBIF, LMA, LMU, Koning (1993)
Angiosperms	Eudicots	Amaranthaceae Juss.	Pupalia	Variety	Pupalia lappacea (L.) Juss. var. velutina (Moq.) Hook.f.	Achyranthes mollis Thonn., Desmochaeta flavescens DC., Pupalia distantiflora A. Rich., Pupalia lappacea var. tomentosa (Peter) Suesseng., Pupalia mollis (Thonn.) Moq., Pupalia tomentosa Peter, Pupalia velutina Moq.		Herb		Annual			1		1		1	1						Native			NP: Angoche. Z: Floresta de Gobene. S: GNP (Blue Maria; Caminho entre o acampamento Bunga e o riacho, base do Mt. Bunga, a noroeste do Parque), Beira à Chicamba, Acampamento Chironde à pista de pouso de Mungári (na Coutada 12), Catapu. G: Mabalane, Mabote, Papai.	FM, TPL, WFO, APD, GBIF, LMA, LMU
Angiosperms	Eudicots	Amaranthaceae Juss.	Pupalia	Species	Pupalia micrantha Hauman	Pupalia psilotrichoides Suess., Sericorema humbertiana Cavaco		Herb		Annual	1				1		1							Native			CD: Montepuez à Nantulo. Z: Namagoa, Lugela. S: GNP (Centro de ciências EO Wilson, Chitengo Camp; Ao longo do caminho entre o acampamento Bunga e o riacho, base do Mt. Bunga).	FM, FZ, POWO, TPL, WFO, APD, GBIF, LMA, LMU
Angiosperms	Eudicots	Amaranthaceae Juss.	Salicornia	Species	Salicornia decumbens (Toelken) Piirainen & G.Kadereit	Arthrocnemum decumbens Toelken, Sarcocornia decumbens (Toelken) A.J.Scott		Herb	Succulent	Perennial								1		1				Native			G: Bilene. MP: I. Inhaca (Ponta Torres).	POWO, TPL, APD, GBIF
Angiosperms	Eudicots	Amaranthaceae Juss.	Salicornia	Species	Salicornia mossambicensis (Brenan) Piirainen & G.Kadereit	Sarcocornia mossambicensis Brenan		Herb		Perennial									1		E	DD		Native			I: I. Mocucuni, Ponta Barra Falsa, Foz do R. Pomene.	IUCN Red List, POWO, TPL, JSTOR, FZ, FM, APD, Darbyshire et al. (2019), K
Angiosperms	Eudicots	Amaranthaceae Juss.	Salicornia	Species	Salicornia natalensis Bunge ex Ung.-Sternb.	Arthrocnemum africanum Moss ex Fourc., Sarcocornia natalensis (Bunge ex Ung.-Sternb.) A.J.Scott,, Arthrocnemum natalense (Bunge ex Ung.-Sternb.) Moss ex Adamson		Herb		Perennial										1				Native			MP: Costa do Sol.	FM, JSTOR, POWO, APD, FZ
Angiosperms	Eudicots	Amaranthaceae Juss.	Salicornia	Species	Salicornia pachystachya Bunge ex Ung.-Sternb.	Arthrocnemum pachystachyum (Bunge ex Ung.-Sternb.) A.Chev		Herb		Annual					1			1	1	1				Native			Z: Quelimane, Micaune. I: Ilha de Bazaruto, Entre Mabote e Zimane. G: Manjacaze. MP: Ilha de Inhaca.	FM, FZ, POWO, TPL, WFO, APD, GBIF, LMA, LMU
Angiosperms	Eudicots	Amaranthaceae Juss.	Salicornia	Species	Salicornia perennis Mill.	Arthrocnemum ambiguum (Michx.) Moq., Arthrocnemum fruticosum var. radicans (Sm.) Moq., Arthrocnemum perenne (Mill.) Fourc., Arthrocnemum variiflorum Moss, Salicornia lignosa J.Woods, Salicornia longispicata A.Chev., Salicornia radicans Sm., Salicornia sarmentosa Duval-Jouve, Sarcathria ambigua Raf., Sarcathria radicans (Sm.) Raf., Sarcocornia perennis (Mill.) A.J.Scott, Sarcocornia perennis var. …		Shrub							1									Native			Z: Mt. Luabo.	FM, FZ, POWO, TPL, WFO, APD, GBIF, LMA, LMU
Angiosperms	Eudicots	Amaranthaceae Juss.	Salicornia	Species	Salicornia perrieri A. Chev.			Herb		Annual					1					1				Native			Z: Kongone (foz do Rio Zambeze). MP: I. Inhaca.	FM, FZ, POWO, TPL, WFO, APD, GBIF, LMA, LMU
Angiosperms	Eudicots	Amaranthaceae Juss.	Salicornia	Species	Salicornia tegetaria (S.Steffen, Mucina & G.Kadereit) Piirainen & G.Kadereit	Sarcocornia tegetaria S.Steffen, Mucina & G.Kadereit		Subshrub									1			1				Native			S: Muanza. MP: Entre Matola e Cidade de Maputo.	APD, POWO
Angiosperms	Eudicots	Amaranthaceae Juss.	Sericorema	Species	Sericorema remotiflora (Hook.) Lopr.	Pupalia remotiflora (Hook.) Moq., Sericocoma remotiflora (Hook.) Benth. & Hook.f., Trichinium remotiflorum Hook.		Herb		Perennial								1						Native			G: Massingir (margem esquerda do rio dos elefantes, andados 110 km para noroeste da Lagoa Nova).	FM, FZ, POWO, TPL, WFO, APD, GBIF, LMA, LMU
Angiosperms	Eudicots	Amaranthaceae Juss.	Suaeda	Species	Suaeda monoica Forssk. ex J.F.Gmel.	Lerchia monoica (Forssk. ex J.F.Gmel.) Kuntze, Salsola monoica (Forssk. ex J.F.Gmel.) Poir., Schoberia monoica (Forssk. ex J.F.Gmel.) Steud., Salsola lana Edgew., Suaeda baluchestanica Akhani & Podlech		Shrub			1		1							1				Native			CD: Nangororo (Rio Ridi), Pemba, Entre Mahate e Quissanga, Quiterajo. NP: Entre Memba e Lúrio, Nacala. MP: Maputo (área de mangal).	FM, FZ, POWO, TPL, WFO, APD, GBIF, LMA, JSTOR, Burrows et al. (2018), K
Angiosperms	Eudicots	Amaranthaceae Juss.	Tecticornia	Species	Tecticornia indica (Willd.) K.A.Sheph. & Paul G.Wilson	Arthrocnemum indicum (Willd.) Moq., Halosarcia indica (Willd.) Paul G.Wilson, Salicornia indica Willd., Sarcathria indica (Willd.) Raf.		Herb	Succulent	Perennial	1	1	1					1	1	1				Native			CD: Quissanga à Pemba, Atolo. NI: Metuge. NP: Ilha Goa. I: Salinas de Banamana. G: Chibuto (Baixo Changana), Alto Limpopo, Saúte (margens do rio Aluizi). MP: Catembe, I. Inhaca, Costa do Sol, Maputo à Matola.	FM, FZ, POWO, TPL, WFO, APD, GBIF, LMA, LMU
Angiosperms	Monocots	Amaryllidaceae J.St.-Hil.	Agapanthus	Subspecies	Agapanthus inapertus Beauverd subsp. inapertus			Herb		Annual										1				Native			MP: Namaacha (Mt. M'Ponduine).	GBIF, POWO, TPL, WFO, FM, LMA
Angiosperms	Monocots	Amaryllidaceae J.St.-Hil.	Agapanthus	Subspecies	Agapanthus inapertus Beauverd subsp. intermedius F.M.Leight.	Agapanthus dyeri F.M.Leight.		Herb		Annual										1				Native			MP: Namaacha, Mt. M'punduine	GBIF, POWO, TPL, WFO, FM
Angiosperms	Monocots	Amaryllidaceae J.St.-Hil.	Ammocharis	Species	Ammocharis tinneana (Kotschy & Peyr.) Milne-Redh. & Schweick.	Crinum ammocharoides Baker, Crinum bainesii Baker, Crinum cordofanum Kotschy & Peyr., Crinum lastii Baker, Crinum ondongense Baker, Crinum poggei Pax, Crinum rhodanthum Baker, Crinum thruppii Baker ex Oliv., Crinum tinneae Kotschy & Peyr., Crinum tinneanum Kotschy & Peyr., Stenolirion elliotii Baker		Herb		Perennial			1	1		1								Native			NP: Ribáuè. T: Tete. MC: Manica.	GBIF, POWO, TPL, WFO, FM, K
Angiosperms	Monocots	Amaryllidaceae J.St.-Hil.	Boophone	Species	Boophone disticha (L.f.) Herb.	Amaryllis disticha L.f., Amaryllis toxicaria (L.f. ex Aiton) D.Dietr., Boophone intermedia M.Roem., Boophone longipedicellata Pax, Boophone toxicaria (L.f. ex Aiton) Herb., Brunsvigia ciliaris (L.) Ker Gawl., Brunsvigia disticha (L.f.) Sweet, Brunsvigia rautanenii Baker, Brunsvigia toxicaria (L.f. ex Aiton) Ker Gawl., Haemanthus ciliaris L., Haemanthus distichus (L.f.) L.f. ex Savage, Haemanthus …		Herb		Perennial				1			1			1				Native	Tchindzondzonzo (T)		MP: Goba, Moamba. T: Angonia, Ulongue, Domue. S: Cheringoma, GNP	GBIF, POWO, TPL, WFO, FM, LMA, Koning (1993)
Angiosperms	Monocots	Amaryllidaceae J.St.-Hil.	Crinum	Variety	Crinum asiaticum L. var. pedunculatum (R.Br.) Fosberg & Sachet	Crinum australe Donn, Crinum australe var. canaliculatum (Roxb.) Herb., Crinum australe var. exaltatum (Herb.) Herb., Crinum australe var. pedunculatum (R.Br.) Herb., Crinum australe var. rubricaule Herb., Crinum brachyandrum Herb., Crinum brevilimbum Carey ex Herb., Crinum canaliculatum Roxb., Crinum douglasii F.M.Bailey, Crinum exaltatum Herb., Crinum norfolkianum A.Cunn., Crinum pedunculatum R…		Herb		Perennial						1	1							Introduced			S: Chitengo Camp (GNP). MC: Chimoio.	POWO, APD, TPL, FM
Angiosperms	Monocots	Amaryllidaceae J.St.-Hil.	Crinum	Species	Crinum aurantiacum Lehmiller			Herb		Perennial	1													Native			CD: Quiterjo.	K, K
Angiosperms	Monocots	Amaryllidaceae J.St.-Hil.	Crinum	Species	Crinum macowanii Baker	Crinum corradii Chiov. ex Chiarugi, Crinum gouwsii Traub, Crinum johnstonii Baker, Crinum macowanii subsp. confusum I.Verd., Crinum pedicellatum Pax		Herb		Perennial	1	1		1		1		1						Native			MC: Dombe. T: Cabora- Bassa. CD: QNP. NI: Maniamba. G: Caniçado	GBIF, POWO, TPL, WFO, FM, LMA
Angiosperms	Monocots	Amaryllidaceae J.St.-Hil.	Crinum	Species	Crinum minimum Milne-Redh.			Herb		Perennial										1				Native			MP: Palmeiras	GBIF, POWO, TPL, WFO, FM, LMA
Angiosperms	Monocots	Amaryllidaceae J.St.-Hil.	Crinum	Species	Crinum paludosum I.Verd.			Herb		Perennial						1	1					LC	Requiring to add Mozambique in the geographic range	Native			MC. S	POWO, IUCN Red List, TPL, WFO, FM
Angiosperms	Monocots	Amaryllidaceae J.St.-Hil.	Crinum	Subspecies	Crinum stuhlmannii Baker subsp. delagoense (I.Verd.) Kwembeya & Nordal	Amaryllis forbesii Lindl., Brunsvigia magnifica Linden & Rodigas, Crinum delagoense I.Verd., Crinum forbesii (Lindl.) Schult. & Schult.f., Crinum somalense Chiov.		Herb		Perennial	1	1		1	1	1	1	1		1				Native	Chindacachicuro (S); Coua (G); Coua (MP); Gonwa (MP); Isewani (MP); Konwa (MP); Sefewami (MP,rong); Sewani (MP,rong); Xindacaxicuro (S)		MP: Moamba, I.Inhaca, Bela Vista, Marracuene, entre Boane e a Moamba, entre o Bobole e Marracuene, Minchafutene, Salamanga. MC: Matarara do Lucite, Reserva Florestal de Moribane, entre Dombe e Matarara do Lucite, Serra Choa. S: GNP, Inhaminga. Z: Lioma. G: Xai – Xai. T: Changara. NI: Mandimba. CD: Quiterajo.	GBIF, POWO, TPL, WFO, FM, LMA, Koning (1993)
Angiosperms	Monocots	Amaryllidaceae J.St.-Hil.	Crinum	Species	Crinum subcernuum Baker	Crinum menyharthii Baker		Herb		Perennial			1				1							Native			NP: Imala. S: R. Savane	GBIF, POWO, TPL, WFO, FM, LMA, BNRH
Angiosperms	Monocots	Amaryllidaceae J.St.-Hil.	Crinum	Species	Crinum verdoorniae Lehmiller			Herb		Perennial						1	1							Native			MC. S	POWO, TPL, WFO, FM
Angiosperms	Monocots	Amaryllidaceae J.St.-Hil.	Crinum	Species	Crinum walteri Overk.			Herb		Perennial						1	1							Native			MC. S	GBIF, POWO, TPL, WFO, FM
Angiosperms	Monocots	Amaryllidaceae J.St.-Hil.	Crinum	Species	Crinum zeylanicum L.	Amaryllis zeylanica L., Crinum latifolium var. zeylanicum (L.) Hook.f.		Herb		Perennial			1											Native			NP: Nampula.	GBIF, POWO, TPL, WFO, FM
Angiosperms	Monocots	Amaryllidaceae J.St.-Hil.	Cryptostephanus	Species	Cryptostephanus vansonii Verdoorn			Herb	Geophyte						1	1	1				NE	LC		Native			Z: Mt. Mabu. MC: Tsetsera, Mts Chimanimani. S: Serra Gorongosa	Müller et al. (2012), POWO, TPL, WFO, FM, Darbyshire et al. (2019), IUCN Red List, K, Wursten et al. (2017)
Angiosperms	Monocots	Amaryllidaceae J.St.-Hil.	Cyrtanthus	Species	Cyrtanthus galpinii Baker	Cyrtanthus balenii E.Phillips		Herb		Perennial						1								Native			MC: Makurupini, Mts Chimanimani	POWO, TPL, WFO, FM, LMA
Angiosperms	Monocots	Amaryllidaceae J.St.-Hil.	Cyrtanthus	Species	Cyrtanthus rhodesianus Rendle			Herb		Perennial						1	1				NE	NT		Native			MC: Mts Chimanimani. S: Serra Gorongosa (Pico Gogógo).	GBIF, POWO, TPL, WFO, FM, Wursten et al. (2017)
Angiosperms	Monocots	Amaryllidaceae J.St.-Hil.	Cyrtanthus	Species	Cyrtanthus sanguineus Walp.	Gastronema sanguineum Lindl.		Herb		Perennial						1						LC	Requiring to add Mozambique in the geographic range	Native			MC: Rotanda, Tandara.	GBIF, POWO, IUCN Red List, TPL, WFO
Angiosperms	Monocots	Amaryllidaceae J.St.-Hil.	Cyrtanthus	Species	Cyrtanthus welwitschii Hiern ex Baker			Herb		Perennial					1									Native			Z: Mt. Namuli.	Timberlake et al. (2009), GBIF, POWO, TPL, WFO
Angiosperms	Monocots	Amaryllidaceae J.St.-Hil.	Pancratium	Species	Pancratium tenuifolium Hochst. ex A.Rich.	Chapmanolirion juttae Dinter, Pancratium chapmannii Harv., Pancratium hirtum A.Chev.		Herb		Perennial			1		1			1						Native			G: Magude. Z: Mocuba. NP: Ribáuè	GBIF, POWO, TPL, WFO
Angiosperms	Monocots	Amaryllidaceae J.St.-Hil.	Scadoxus	Subspecies	Scadoxus multiflorus (Martyn) Raf. subsp. multiflorus	Haemanthus abyssinicus Herb., Haemanthus andrei De Wild., Haemanthus arabicus M.Roem., Haemanthus arnoldianus De Wild. & T.Durand, Haemanthus bequaertii De Wild., Haemanthus bivalvis Beck, Haemanthus cecilae Baker, Haemanthus colchicifolius Salisb., Haemanthus cruentatus Schumach. & Thonn., Haemanthus delagoensis Herb., Haemanthus eurysiphon Harms, Haemanthus filiflorus Baker ex Hiern, Haemanthus…		Herb		Perennial	1		1	1	1	1				1				Native	Munhacacecane (S); Sichedanine (MP,rong)		MP: Entre Goba e Boane. MC: Mavita, Amatongas, Báruè, Garuso, Dombe . T: Ulongue, Cabora Bassa. NP: Nampula. Z: Serra Chiperone, Nicoadala. CD: Mueda, Palma, Quiterajo.	Timberlake et al. (2009), GBIF, POWO, TPL, WFO, Koning (1993), BNRH, K
Angiosperms	Monocots	Amaryllidaceae J.St.-Hil.	Scadoxus	Species	Scadoxus puniceus (L.) Friis & Nordal	Haemanthus fax-imperii Cufod., Haemanthus goetzei Harms, Haemanthus insignis Hook., Haemanthus magnificus (Herb.) Herb., Haemanthus natalensis Hook., Haemanthus orchidifolius Salisb., Haemanthus puniceus L., Haemanthus puniceus var. fortuita Herb., Haemanthus puniceus var. magnificus Herb., Haemanthus redouteanus M.Roem., Haemanthus redouteanus var. subalbus M.Roem., Haemanthus rouperi auct., Hae…		Herb		Perennial										1				Native	Sefewami (MP,rong); Sewani (MP,rong)		MP: I.Inhaca	GBIF, POWO, TPL, WFO, Koning (1993)
Angiosperms	Monocots	Amaryllidaceae J.St.-Hil.	Tulbaghia	Species	Tulbaghia alliacea L.f.	Omentaria alliacea (L.f.) Kuntze, Tulbaghia affinis Link, Tulbaghia brachystemma Kunth, Tulbaghia inodora Gaertn., Tulbaghia narcissifolia Salisb.		Herb		Perennial						1								Native			MC: Musapa	POWO, TPL, WFO, FM
Angiosperms	Monocots	Amaryllidaceae J.St.-Hil.	Tulbaghia	Species	Tulbaghia cameronii Baker	Tulbaghia hockii De Wild.		Herb		Perennial														Native			Northern Mozambique.	POWO, TPL, WFO
Angiosperms	Monocots	Amaryllidaceae J.St.-Hil.	Tulbaghia	Species	Tulbaghia friesii Suess.	Tulbaghia rhodesica Weim.		Herb	Geophyte							1					NE	LC		Native			MC: Serra Choa.	POWO, IUCN Red List, TPL, WFO, Darbyshire et al. (2019), K
Angiosperms	Eudicots	Anacardiaceae R.Br.	Anacardium	Species	Anacardium occidentale L.	Acajuba occidentalis (L.) Gaertn., Anacardium microcarpum Ducke, Anacardium occidentale var. americanum Jacq., Anacardium occidentale var. gardneri Engl., Cassuvium pomiferum Lam., Cassuvium reniforme Blanco, Cassuvium solitarium Stokes		Tree				1	1	1	1	1	1	1	1	1				Introduced	Corosso (NI); Dingaloche (CD); Encuajo (CD); Khanju (MP,rong); Mucado (NP)	Food, Livestock Fodder, Medicine	MP: I. de Inhaca, Ponta Torres, I. dos Portugueses, Namaacha, Goba, Matola Garre, Nkobe, Catembe-Mogazine, Matutuíne, Ponta do Ouro, Bela Vista, Catuane, Uampochane-Salamanga, R. Umbelúzi, Manhiça, Xinavane, Machava – Moamba. G: Cidade de Xai-Xai, Manjacaze, Chongoene, Floresta do Sr. Dias Cassiana, Mabalane, Combomune, Bilene – Macia, Macia. I: Morrumbene, Inhamitanga, Mabote, Govuro, Zimane, Vi…	FM, FZ, TPL, WFO, POWO, LMA, GBIF, Koning (1993), Bruschi et al. (2014), Bruschi et al. (2011), Burrows et al. (2018)
Angiosperms	Eudicots	Anacardiaceae R.Br.	Harpephyllum	Species	Harpephyllum caffrum Bernh	Harpephyllum serratum Sond. ex Walp., Odina caffra Hook. ex Marchand, Spondias falcata Meisn., Tapirira caffra (Bernh. ex C.Krauss) Marchand		Tree												1				Native			MP: Namaacha, Vila Pouca.	FM, FZ, TPL, WFO, POWO, LMA, GBIF, Burrows et al. (2018)
Angiosperms	Eudicots	Anacardiaceae R.Br.	Lannea	Species	Lannea antiscorbutica (Hiern) Engl.	Calesiam antiscorbutica Hiern, Odina antiscorbutica K.Schum.		Shrub									1			1				Native	Chiumbucauto (MP); Ximombane (I,tswa)		MP: Ungubana, Magude. S: Catapu, serraria James White, Nhambita, GNP, serraria Levasflor, R. Chinizíua (Quessemaza).	TPL, WFO, POWO, GBIF, Koning (1993), BNRH, Burrows et al. (2018), K
Angiosperms	Eudicots	Anacardiaceae R.Br.	Lannea	Species	Lannea discolor (Sond.) Engl.	Calesiam discolor (Sond.) Kuntze, Odina discolor Sond.	Tapirira discolor (Sond) Marchand	Tree			1					1	1			1		LC		Native	Chumbo (MC); Tchuimbo (T); Tchuimbo (T)	Medicine	CD: Palma, Quionga. S: Nhambita, GNP. MC: Báruè, CNR. MP: Moamba-Boane, Reserva Florestal de Licuáti.	Timberlake et al. (2009), TPL, FM, FZ, POWO, IUCN Red List, GBIF, Koning (1993), Bandeira et al. (2001), Bruschi et al. (2011), Ribeiro et al. (2010), Burrows et al. (2018)
Angiosperms	Eudicots	Anacardiaceae R.Br.	Lannea	Species	Lannea edulis (Sond.) Engl.	Lannea nana Engl., Odina edulis Sond.		Shrub					1	1	1	1				1				Native	Mularambuzi (T); N'Kumbagumba (T); Tchtambalala (X)	Medicine	MP: Estatuene. MC: CNR, Mavita. Z: Gúruè, Milange. T: Furancungo, Ulónguè. NP: Ribáuè, Lalaua.	FM, FZ, TPL, JSTOR, POWO, GBIF, LMA, Koning (1993), Conde et al. (2014)
Angiosperms	Eudicots	Anacardiaceae R.Br.	Lannea	Subspecies	Lannea gossweileri Exell & Mendonça subsp. tomentella (R. & A. Fernandes) J.B. Gillett	Lannea gossweileri var. tomentella R. Fern. & A. Fern.		Shrub						1													T: Ulónguè.	POWO, APD, LMA
Angiosperms	Eudicots	Anacardiaceae R.Br.	Lannea	Species	Lannea schimperi (Hochst. ex A.Rich.) Engl.	Lannea rufescens Engl., Lannea ruspollii Engl., Lannea schimperi var. glabrescens (Engl.) J.B.Gillett, Lannea stolzii Engl. & Brehmer, Odina schimperi F.Hoffm., Odina schimperi Hochst. ex A.Rich.		Tree			1	1	1	1	1	1	1		1	1				Native	Canhupo (CD); Canhupo (NP); Canhupo (Z); Chumbo (S); Anhuko (CD); Kanyupu (CD); Msatoto (S); Mugandkomo (MC,sho); Muhumbo (S); Mumbo (S); Mupuri (MC); Mupuri (T); Nsaumbu (T); Ungomo (MC)	Medicine	MP: Namaacha, Changalane, Estatuene, Goba, Moamba, Boane e Umbelúzi, Salamanga, Floresta de Magala, de Marracuene, Praia da Costa do Sol, Bela Vista - Catuane, Mavalane, Mazeminhama- Changalane. I: Panda, Govuro, Mabote, Tessolo. MC: Mapindanganga, Floresta Mahate (no monte Chipara), Báruè, Catandica, Mungári. S: Levasflor, R. Chinizíua (Quessemaza), Nhambita, GNP, Cheringoma, R. Nhamfisse, Nhama…	FM, FZ, TPL, WFO, POWO, LMA, GBIF, Koning (1993), Bandeira et al. (2007), BNRH, Burrows et al. (2018), K
Angiosperms	Eudicots	Anacardiaceae R.Br.	Lannea	Variety	Lannea schweinfurthii (Engl.) Engl. var. acutifoliolata (Engl.) Kokwaro	Odina stuhlmannii var. acutifoliolata Engl.		Tree			1																CD: Palma to Quionga, Quiterajo.	TPL, POWO, APD, BNRH, K, JSTOR
Angiosperms	Eudicots	Anacardiaceae R.Br.	Lannea	Variety	Lannea schweinfurthii (Engl.) Engl. var. stuhlmannii (Engl.) Kokwaro	Lannea ambigua Engl., Lannea kirkii Burtt Davy, Lannea stuhlmannii (Engl.) Eyles, Odina stuhlmannii Engl., Commiphora porensis Engl.		Tree						1										Native	Canhupa (NP); Chebombocanho (G); Chebombocanho (MP); Chikumbunkanyi (MP); Chilussa (T); Chimbocanho (MP); Chimbucanhi (MP,rong); Chimbukani (MP); Chimbukanji (MP); Chimonzane (MP); Chimucanho (MP); Chiumbocanhe (MP); Chiumbucanhe (Z); Chumbocanho (MP); Mfula (S); Mubsototo (MC,sho); Mugano (X,sho); Mussototo (MC); M'Pandja (CD,macu); M'Pôxa(NP); M'Sutôt (S); M'Sutoto (S); Nhetehacapa (Z); Psototo…	Food, Handicraft	T: Angónia, Ulónguè.	TPL, WFO, POWO, LMA, Koning (1993), Bandeira et al. (2007), Santo-António and Goulão (2015), Burrows et al. (2018)
Angiosperms	Eudicots	Anacardiaceae R.Br.	Lannea	Variety	Lannea schweinfurthii (Engl.) Engl. var. tomentosa (Dunkley) Kokwaro	Lannea stuhlmannii var. tomentosa Dunkley		Tree			1	1	1		1	1	1							Native			S: Gorongosa, Chitengo, Bela Vista, GNP, R. Mafambisse, Nhambita, Nhamatanda, R. Rutuzo. MC: Matarara do Lucite, Gondola, Matarara, Chiboma, Chimoio, Mupindanganga. Z: Alto Molócuè, estrada para Mugena. NP: Malema, Mutuáli, estrada para Lioma, Mutuáli, R. Lúrio, Monapo, Marrua, Mocubúri, Muite, Mocuba-Ile, Lalaua , Muitetere, Malema, Pebane, Regone. NI: Mutuáli, Cuamba, Mandimba, Nungo, R. Montep…	FM, FZ, TPL, WFO, POWO, GBIF, LMA, BNRH
Angiosperms	Eudicots	Anacardiaceae R.Br.	Lannea	Variety	Lannea welwitschii (Hiern) Engl. var. ciliolata Engl.	Lannea amaniensis Engl. & K. Krause		Tree			1																CD: Mueda.	GBIF, APD
Angiosperms	Eudicots	Anacardiaceae R.Br.	Mangifera	Species	Mangifera indica L.	Mangifera amba Forssk., Mangifera anisodora Blanco, Mangifera austroyunnanensis Hu, Mangifera balba Crevost & Lemarié, Mangifera cambodiana (Pierre) Anon., Mangifera domestica Gaertn., Mangifera equina Crevost & Lemarié, Mangifera gladiata Bojer, Mangifera kukulu Blume, Mangifera laxiflora Desr., Mangifera linnaei Korth. ex Hassk., Mangifera maritima Lechaume, Mangifera mekongensis (Pierre) Anon.…		Tree				1							1	1				Introduced	Manga (MP); Mangeira (MP); Mangue (MP)	Food, Fuel, Medicine	MP: Cidade de Maputo, I. de Inhaca, distrito de Manhiça. I: distrito de Zavala, baixa pantanosa, zona ribeirinha e dunas. NI: à 68 km ao longo da estrada de Maúa à Marrupa, Floresta aberta, R. Messala, Cuamba, Antigo Posto admnistrativo da Foz do Lúrio.	GBIF, LMA, TPL, WFO, POWO, FZ, FM, Koning (1993), Barbosa et al. (2020), Bruschi et al. (2011), Bandeira et al. (2007), Burrows et al. (2018)
Angiosperms	Eudicots	Anacardiaceae R.Br.	Ozoroa	Species	Ozoroa engleri R.Fern. & A.Fern.			Tree												1		LC		Native	Xinungo (MP,rong); Xinungumafe (MP,rong)	Medicine	MP: Boane, Changalene, Moamba, Ressano Garcia, Sabié, Namaacha, Goba, Catembe, Bela Vista, Catuane, Santaca, Mts Libombos, Sociedade Pecuaria de Mazeminhama	FM, FZ, TPL, WFO, POWO, IUCN Red List, LMA, GBIF, Koning (1993), Burrows et al. (2018)
Angiosperms	Eudicots	Anacardiaceae R.Br.	Ozoroa	Species	Ozoroa gomesiana R.Fern. & A.Fern.			Shrub											1		E	VU		Native			I: Vilanculos, Temane (área de exploração de gás), Pambarra, Massitele, Muabsa, Chissuati, Mapinhane, Mapinhane, Mavume.	FM, FZ, TPL, WFO, Darbyshire et al. (2019), IUCN Red List, Burrows et al. (2018), K
Angiosperms	Eudicots	Anacardiaceae R.Br.	Ozoroa	Subspecies	Ozoroa insignis Delile subsp. reticulata (Baker f.) J.B.Gillett	Heeria insignis var. reticulata Baker f., Heeria reticulata (Baker f.) Engl., Ozoroa reticulata (Baker f.) R.Fern. & A.Fern		Shrub			1	1	1	1	1	1	1		1					Native	Chicandue (MC,sho); Chinünci (T,sho); Chinünci (X); Curapué (Z,sho); É : Rrica (NP,macu); Mapuitene (NI,yao); Niharrabüa (MC); Nnharulapna (NI,yao); Nnharulapwa (NI); Tuco-Tuco (T); Xifuga (MP,rong)	Medicine	I: Massinga. S: Serra Gorongosa, GNP.MC: Mavita, Serra Mocuta, Matarara, R. Lucite, Serra Mocuta. T: Angónia, Ulónguè,Cahora Bassa, R. Capambadazi, Mágoè, Songo, Chicoa, Fíngoè, Mt. Zóbuè, Maravia. Z: Gúruè, Lioma, Alto Molócuè. NP: Mecubúri, Imala, Lalaua, Mt. Titialo, Monapo, Reserva Florestal do Sr. Wolf, Mocuburi, Amaramba, Mutuáli, Malema, Corane, Ribáuè. NI: Marrupa, Nungo, Lichinga, Massan…	Müller et al. (2012), Timberlake et al. (2009), TPL, WFO, POWO, LMA, GBFI, LMU, Koning (1993), Bruschi et al. (2011), BNRH, Burrows et al. (2018), K
Angiosperms	Eudicots	Anacardiaceae R.Br.	Ozoroa	Species	Ozoroa longepetiolata R.Fern. & A.Fern.			Tree					1														NP: Serra Chinga.	LMA, TPL, POWO
Angiosperms	Eudicots	Anacardiaceae R.Br.	Ozoroa	Variety	Ozoroa obovata (Oliv.) R. Fern. & A. Fern. var. obovata	Rhus sinuata Eckl. & Zeyh.		Shrub			1		1		1	1	1	1	1	1				Native	Catassaro (MC,sho); Cataussarro (MC,sho); Chifïssa (MP,rong); Chifuca (MP,rong); Chimungumango (G); Chincanduè (MC,sho); Chinungo(G); Chinungo (MP,rong); Chinungomafe (I,tswa); Chinungo-Mafo (I,tswa); Chinungumafe (G); Chinungumafi (MP,rong); Insassa(I,copi); Losso (I,tswa); Mânicabi (Z,sho); Mucacambi (Z,sho); Mudjile (Z,sho); Nacurrapiu (Z,sho); Namicuri (NI,yao); Nicarraga (Z,sho); Niharrapua …	Medicine, Veterinary	MP: Polana e Costa do Sol, Moamba, Pessene, I. Inhaca, Saco da Inhaca, Mt. Inhaca, Santaca, Bela Vista, Tinonganine, Marracuene, Manhiça, Marracuene, Muinguine, Matutuíne, Salamanga, Zitundo, Ponta do Ouro, REM, Reserva Florestal de Licuáti G: Combomune, Macia, S. Martinho do Bilene, Chonguene, Chicumbane, Barra do Limpopo, Cidade de Xai-Xai. I: Funhalouro, Lagoa de Inhambane, Massinga, Pomene, M…	FZ, FM, POWO, GBIF, Koning (1993), Bandeira et al. (2001), Barbosa et al. (2020), Bruschi et al. (2011), Ribeiro et al. (2010), BNRH, Burrows et al. (2018), K
Angiosperms	Eudicots	Anacardiaceae R.Br.	Ozoroa	Variety	Ozoroa obovata (Oliv.) R.Fern. & A.Fern. var. elliptica R. & A. Fernandes	Heeria mucronata var. obovata (Oliv.) Engl.		Shrub					1	1	1	1	1	1	1	1	NE			Native			MP: Changalane, Marracuene, Umbelúzi, Matola, Moamba, Ressano Garcia, Magude. G: Mapulanguene, Massingir, Lagoa Nova, R. dos Elefantes, Guijá, Maguezimane, Chidenguele, Macia, S. Martinho, Chokwé, Alto Limpopo, Mapai, Massangena. I: Massinga, Funhalouro, Saute. S: GNP, Mt. Xiluvo, Nhamatanda, Nhamatanda, Lamego, R. Muda, Mt. Chiluvo, Chemba, Blue Maria, Nhambita, Acampamento M'Phingwe, Catapu, R.…	FM, FZ, GBIF, LMA, Darbyshire et al. (2019), LMU, BNRH, Burrows et al. (2018)
Angiosperms	Eudicots	Anacardiaceae R.Br.	Ozoroa	Variety	Ozoroa obovata (Oliv.) R.Fern. & A.Fern. var. gomesiana (R. & A.Fernandes) R. & A.Fern.			Shrub					1						1	1				Native			MP: Jardim botânico do Campus Universitário da UEM. I: Mavume, Mapinhane, Funhalouro, Inhassoro, Temane. NP: Ribáuè, Mecubúri, Serra Chinga, R. Macasse.	GBIF, LMA
Angiosperms	Eudicots	Anacardiaceae R.Br.	Ozoroa	Variety	Ozoroa paniculosa (Sond.) R.Fern. & A.Fern. var. paniculosa			Shrub											1	1				Native			MP: Goba, Namaacha, Sábiè, Ressano Garcia. I: Govuro, Mabote, Jofane.	FZ, APD, FM, POWO, GBIF, LMA
Angiosperms	Eudicots	Anacardiaceae R.Br.	Ozoroa	Variety	Ozoroa pwetoensis (Van der Veken) R. Fern. & A. Fern. var. angustifolia R. Fern. & A. Fern.			Shrub				1		1										Native			T: Furancungo à Bene, Fíngoè à Chiputo, Angónia (Cachene). NI: Unango to Rovuma River bridge.	FM, APD, BNRH, Burrows et al. (2018)
Angiosperms	Eudicots	Anacardiaceae R.Br.	Ozoroa	Species	Ozoroa sphaerocarpa R.Fern. & A.Fern.			Tree												1		LC		Native			MP: Sabié, Moamba, Boane, Namaacha, Goba, Mt. de Goba, Mts Libombos, Marracuene.	FZ, TPL, WFO, POWO, IUCN Red List, GBIF, LMA, Burrows et al. (2018)
Angiosperms	Eudicots	Anacardiaceae R.Br.	Pseudospondias	Species	Pseudospondias microcarpa (A.Rich.) Engl			Tree							1												Z: Zambézia.	FM, POWO, LMA, APD
Angiosperms	Eudicots	Anacardiaceae R.Br.	Schinus	Species	Schinus terebinthifolia Raddi			Shrub												1				Introduced			MP: Jardim Botânico Tunduru.	TPL, WFO, POWO, Da Silva et al. (2004), FM, FZ, GBIF, LMA
Angiosperms	Eudicots	Anacardiaceae R.Br.	Sclerocarya	Subspecies	Sclerocarya birrea (A.Rich.) Hochst. subsp. caffra (Sond.) Kokwaro	Poupartia caffra (Sond.) H.Perrier, Poupartia excelsa Marchand, Sclerocarya caffra Sond., Sclerocarya schweinfurthiana Schinz, Sclerocarya shakua Baker, Commiphora acutidens Engl.,Commiphora subglauca Engl		Tree				1	1	1	1	1	1	1	1	1				Native	Mupfura; Mutsomo; N'Fula (sena); Canhi (MP,rong); Canho (MP,rong); Canhu (MP,rong); Cheteco (T); Medangwa (MC,sho); Mefula (S); Mepepo (NI,macu); Metula (Z); Muchangua (MC,sho); Muganu (MC,sho); Mukóko (NI); M'Fura (T); M'Koko (NI); M'Tula (Z); Nkanye (MP,rong); N'Kanhy (I); N'Kóko (NI); Ocanho (MP,rong); Tchumbo (T,nya); Unfula (S)	Beliefs, Food, Handicraft, Medicine	MP: Manhiça, 3 de Fevereiro, I. de Inhaca, Namaacha, Goba, Boane, Mavalane “B”, Jardim Botânico do IIAM, Bobole, Marracuene, Costa do Sol, Marracuene, Manhiça, Bobole, Moamba, Chinhanguanine, R. Incomáti, Matutuíne, Zitundo. G: Guijá, Estivane, R. Limpopo. I: Massinga, Saute, Funhalouro, Vilanculos, Zavala, Inhassoro, Nhapele, Massinga, Saute, Funhalouro. S: Cheringoma, Chemba, Lone, R. Buzi, GNP…	POWO, GBIF, LMA, Koning (1993), Bandeira et al. (2001), Bruschi et al. (2014), Ribeiro et al. (2010), Bruschi et al. (2011), Bandeira et al. (2007), Santo-António and Goulão (2015), BNRH, Burrows et al. (2018)
Angiosperms	Eudicots	Anacardiaceae R.Br.	Searsia	Species	Searsia acuminatissima (R.Fern. & A.Fern.) Moffett	Rhus acuminatissima R.Fern. & A.Fern., Rhus retinorrhoea		Shrub					1		1						NE	NT		Native			Z: Mt. Namuli, Planalto de Naconha, Gúruè, nascente do R. Malema, Alto Molócuè, Mt. Gilé, Serra Morrumbala, Mt. Ile. NP: Serra Ribáuè, Mt. Mepalué	FM, POWO, GBIF, IUCN Red List, Burrows et al. (2018), K, Darbyshire et al. (2019)
Angiosperms	Eudicots	Anacardiaceae R.Br.	Searsia	Species	Searsia chirindensis (Baker f.) Moffett	Rhus chirindensis Baker f., Rhus legatii Schönland, Searsia legatii (Schönland) F.A.Barkley		Shrub								1						LC		Native			MC: Chimoio, Gondola, serração de Braunstein, R. do Ouro, Macequece, Vila de Manica, Amatongas, Fr. Nhamissanguere, R. Nhamouare, Mavita.	POWO, IUCN Red List, GBIF, TPL, WFO, Burrows et al. (2018), K, Wursten et al. (2017)
Angiosperms	Eudicots	Anacardiaceae R.Br.	Searsia	Species	Searsia crenulata (A.Rich.) Moffett	Rhus buettneri Engl., Rhus crenulata A.Rich., Rhus glaucescens A.Rich., Searsia glaucescens (A.Rich.) Moffett		Shrub				1												Native			NI: Mbuna Bay Lodge (Metangula).	POWO, BNRH
Angiosperms	Eudicots	Anacardiaceae R.Br.	Searsia	Species	Searsia dentata (Thunb.) F.A.Barkley	Rhus acutidens Engl., Rhus dentata Thunb., Rhus grandidentata DC., Rhus micrantha Thunb., Rhus parvifolia Harv., Rhus sonderi Engl., Toxicodendron dentatum (Thunb.) Kuntze, Toxicodendron sonderi (Engl.) Kuntze		Shrub								1						LC		Native		Medicine	MC: Rotanda, Serra Messambuzi, Serra Zuira, Planalto Tsetsera, Sussundenga, Mavita.	POWO, GBIF, IUCN Red List, Bruschi et al. (2011), Burrows et al. (2018)
Angiosperms	Eudicots	Anacardiaceae R.Br.	Searsia	Species	Searsia gueinzii (Sond.) F.A.Barkley	Rhus gueinzii Sond., Rhus simii Schönland, Rhus spinescens Diels, Searsia simii (Schönland) F.A.Barkley, Searsia spinescens (Diels) F.A.Barkley, Toxicodendron gueinzii (Sond.) Kuntze, Rhus gueinzii var. spinescens (Diels) R. & A.Fernandes		Shrub										1		1		LC		Native			MP: Boane, Changalene, Umbelúzi, Namaacha, Goba, Moamba, Marracuene, Catuane, Magude, Mapulanguene, Matola Gare, Sabié, Incomati, R. Chalange, Mts Libombos. G: Xai-Xai, Praia de Xai-Xai, Guijá, R. Limpopo.	POWO, GBIF, IUCN Red List, Burrows et al. (2018)
Angiosperms	Eudicots	Anacardiaceae R.Br.	Searsia	Species	Searsia leptodictya (Diels) T.S.Yi, A.J.Mill. & J.Wen	Rhus amerina Meikle, Rhus leptodictya Diels, Rhus rhombocarpa R.Fern. & A.Fern.		Shrub												1		LC		Native			MP: Costa do Sol, Marracuene, Namacha, Goba.	POWO, IUCN Red List, GBIF, FM, Burrows et al. (2018)
Angiosperms	Eudicots	Anacardiaceae R.Br.	Searsia	Species	Searsia longipes (Engl.) Moffett	Rhus longipes Engl., Toxicodendron longipes (Engl.) Kuntze		Shrub			1	1	1	1	1	1	1					LC		Native		Food	MC: CNR, Mavita, R. Messambuzi, Mt. Vumba. T: Vila Mouzinho, Moatize, Angónia, Ulónguè, Marávia, Chiputo, Fíngoè. Z: Gúruè à Ile, Lioma, Alto Molocué, Milange, Molumbo. NP: Ribáuè, Serra Mepalue. NI: Mt. Sanga, Maua, Marrupa, R. Messalo, Metónia, Massangulo, Mecula, R. Luculumezi. CD: Macondes, Chomba, Negomano, Metónia, Massangulo, Mueda, Mocímboa da Praia, Nangade, Nango.	POWO, IUCN Red List, GBIF, LMA, Santo-António and Goulão (2015), BNRH, FM
Angiosperms	Eudicots	Anacardiaceae R.Br.	Searsia	Species	Searsia lucida (L.) F.A.Barkley	Rhus africana Mill., Rhus cavanillesii DC., Rhus lucida L., Rhus outeniquensis Szyszyl., Rhus schlechteri Diels, Searsia africana (Mill.) F.A.Barkley, Toxicodendron africanum (Mill.) Kuntze, Toxicodendron lucidum (L.) Kuntze		Shrub												1				Native			MP: Mts Libombos (Rio Changalane).	GBIF, POWO, TPL, APD
Angiosperms	Eudicots	Anacardiaceae R.Br.	Searsia	Species	Searsia natalensis (Bernh. ex C.Krauss) F.A.Barkley	Rhus glaucescens A. Rich., Rhus glaucescens A. Rich. var. natalensis (Bernh. ex Krauss) Engl., Rhus natalensis Bernh. ex C. Krauss, Rhus incana var. dahomensis Hutch. & Dalziel, Rhus collina Engl., Rhus macrocarpa Engl., Toxicodendron macrocarpum (Engl.) Kuntze, Toxicodendron natalense (Bernh. ex C.Krauss) Kuntze		Shrub			1	1		1		1	1	1	1	1		LC		Native			MP: Namaacha, Movene, Moamba, Chinhanguanine, I. Inhaca, Saco da Inhaca, Ponta Torres, Barreira Vermelha, Manhiça, Calanga, Matutuíne, Costa do Sol, Polana, Matutuíne, Ponta do Ouro, Marracuene, R. Incomáti. G: Chongoene, Mandjacaze, Chidenguele. I: Govuro, Vilanculos, Mambone, Mabote. S: Concessão de Levasflor area de Acampamento, GNP, R. Sungue. MC: Chibata. T: Mts Zóbuè,Metengo, Balama, Magoé,…	TPL, WFO, POWO, IUCN Red List, FM, GBIF, BNRH, Burrows et al. (2018), Wursten et al. (2017)
Angiosperms	Eudicots	Anacardiaceae R.Br.	Searsia	Species	Searsia nebulosa (Schönland) Moffett	Rhus nebulosa Schönland		Shrub			1									1		LC		Native			MP: REM, R. Piti, Marracuene, Manhiça, Bobole, Benfica, Infulene. CD: Macondes, Chomba, Negomane.	POWO, FM, GBIF, IUCN Red List, Burrows et al. (2018)
Angiosperms	Eudicots	Anacardiaceae R.Br.	Searsia	Species	Searsia ochracea (Meikle) Moffett	Rhus ochracea Meikle		Tree					1														NP: Entre Namaponda e Muatua.	POWO, LMA
Angiosperms	Eudicots	Anacardiaceae R.Br.	Searsia	Species	Searsia pentheri (Zahlbr.) Moffett	Rhus cuneata N.E.Br., Rhus pentheri Zahlbr.		Shrub												1		LC		Native			MP: Namacha, Moamba, Changalane, Mts Libombos.	POWO, IUCN Red List, GBIF, FM, Burrows et al. (2018)
Angiosperms	Eudicots	Anacardiaceae R.Br.	Searsia	Variety	Searsia pyroides (Burch.) Moffett var. dinteri (Engl.) Moffett	Rhus dinteri Engl., Rhus impermeabilis Dinter		Shrub												1				Native			MP: Marracuene, Namaacha.	POWO, GBIF
Angiosperms	Eudicots	Anacardiaceae R.Br.	Searsia	Variety	Searsia pyroides (Burch.) Moffett var. gracilis (Engl.) Moffett	Rhus conrathii Burtt Davy, Rhus flexuosa Diels, Rhus villosa var. gracilis Engl.		Shrub						1						1				Native			MP: Marracuene, Namaacha, Ponta do Ouro, Zitundo, R. Cole, Namaacha, Matola, EN4, R. Movene, Sábiè, Moamba, R. Incomáti, Magude. T: Angónia, Vila Ulónguè.	POWO, GBIF, FM, LMA, Burrows et al. (2018)
Angiosperms	Eudicots	Anacardiaceae R.Br.	Searsia	Variety	Searsia pyroides (Burch.) Moffett var. integrifolia (Engl.) Moffett	Rhus fraseri Schönland, Rhus microcarpa Schönland		Shrub										1		1				Native		Food	MP: I. Inhaca, praia próximo a EBMI, Pts. Torres, Marracuene, Costa do Sol, Catembe, REM, R. Futi, Namaacha, Goba, R, Callichane, Matutuíne, Tinonganine, Bela Vista, Zitundo, Ponta de Ouro, Polana. G: Bilene, Macia, Xai-Xai, Chongoene, Mandjacaze, Mangunze, Missão de São Benedito dos Muchopes, Inhampsi, Xai-Xai, Chicumbane.	POWO, GBIF, FM, LMA, Santo-António and Goulão (2015), Burrows et al. (2018)
Angiosperms	Eudicots	Anacardiaceae R.Br.	Searsia	Variety	Searsia pyroides (Burch.) Moffett var. pyroides	Rhus baurii Schönland, Rhus intermedia Schönland, Rhus steudneri Engl., Rhus tridentata Sond., Rhus villosa Hochst. ex A.Rich., Rhus vulgaris Meikle		Shrub						1										Native		Food	T: Angónia, Ulónguè.	POWO, GBIF, FM, Santo-António and Goulão (2015), Burrows et al. (2018)
Angiosperms	Eudicots	Anacardiaceae R.Br.	Searsia	Species	Searsia quartiniana (A.Rich.) A.J.Mill.	Rhus huillensis Engl., Rhus kotschyana Fenzl, Rhus quartiniana A.Rich., Rhus stolzii Engl., Toxicodendron quartinianum (A.Rich.) Kuntze, Rhus quartiniana A. Rich. var. zambesiensis R. & A. Fern.		Shrub						1								LC		Native			T: Angónia, Posto Zootécnico, R. Maue.	POWO, GBIF, FM, IUCN Red List, Burrows et al. (2018)
Angiosperms	Eudicots	Anacardiaceae R.Br.	Searsia	Species	Searsia refracta (Eckl. & Zeyh.) Moffett	Rhus refracta Eckl. & Zeyh., Toxicodendron refractum (Eckl. & Zeyh.) Kuntze		Shrub									1							Native			S: Cheringoma, Planalto de Cheringoma, Inhaminga, R. Urema, R. Nhamfisse, Muaza, GNP.	TPL, WFO, POWO, GBIF, FM, BNRH, Burrows et al. (2018)
Angiosperms	Eudicots	Anacardiaceae R.Br.	Searsia	Species	Searsia rehmanniana (Engl.) Moffett	Rhus rehmanniana Engl., Toxicodendron rehmannianum (Engl.) Kuntze, Rhus macowanii Schönland, Rhus rehmanniana var. longecuneata R. & A.Fernandes		Shrub												1		LC		Native			MP: Namaacha, Goba.	TPL, WFO, POWO, GBIF, LMA, FM, IUCN Red List, Burrows et al. (2018), K
Angiosperms	Eudicots	Anacardiaceae R.Br.	Searsia	Species	Searsia rogersii (Schönland) Moffett	Rhus rogersii Schönland		Shrub												1				Native			MP: Mts Libombos.	POWO, GBIF, Burrows et al. (2018)
Angiosperms	Eudicots	Anacardiaceae R.Br.	Searsia	Species	Searsia tenuinervis (Engl.) Moffett	Rhus commiphoroides Engl. & Gilg, Rhus tenuinervis Engl. var. meikleana R. Fern. & A. Fern., Rhus tenuinervis Engl., Rhus amboensis Schinz, Rhus buluwayensis Diels, Rhus kwebensis N.E.Br., Toxicodendron tenuinerve (Engl.) Kuntze		Shrub				1	1	1		1			1			LC		Native			I: Panda. MC: Cidade de Chimoio, Catandica. T: Cabora Bassa, Zóbuè, Moatize, Malema. NP: Cidade de Nampula, Corrane, Ribáuè, Serra Ribáuè. NI: Metangula.	POWO, GBIF, LMA, IUCN Red List, BNRH, Burrows et al. (2018)
Angiosperms	Eudicots	Anacardiaceae R.Br.	Searsia	Species	Searsia tenuipes (R.Fern. & A.Fern.) Moffett	Rhus tenuipes R.Fern. & A.Fern.		Shrub												1		LC	Requiring to add Mozambique in the geographic range	Native			MP: Goba.	FM, LMA, POWO, IUCN Red List
Angiosperms	Eudicots	Anacardiaceae R.Br.	Searsia	Variety	Searsia tumulicola (S.Moore) Moffett var. tumulicola	Rhus culminum R.Fern. & A.Fern., Rhus dura Schönland, Rhus synstylica R.Fern. & A.Fern., Searsia dura (Schönland) F.A.Barkley		Shrub								1	1							Native			MC: Sussundenga, Serra Zuira, planalto da Tsetsera. S: Serra Gorongosa (Mt. Gogógo, Mt. Zombué).	POWO, FM, GBIF, LMA, Burrows et al. (2018), Wursten et al. (2017)
Angiosperms	Eudicots	Anacardiaceae R.Br.	Sorindeia	Species	Sorindeia juglandifolia (A.Rich.) Planch. ex Oliv.	Dupuisia juglandifolia A.Rich., Sorindeia adolfi-friederici Engl. & Brehmer, Sorindeia claessensii De Wild., Sorindeia collina Keay, Sorindeia gossweileri Exell, Sorindeia heterophylla Hook.f., Sorindeia, katangensis Van der Veken, Sorindeia lundensis Exell & Mendonça, Sorindeia mayumbensis Van der Veken, Sorindeia ngounyensis Pellegr., Sorindeia poggei Engl., Sorindeia rhodesica R.Fern. & A.Fern…		Shrub												1		LC		Native			MP: Polana, Costa do Sol.	TPL, WFO, POWO, FM, GBIF, FZ, IUCN Red List
Angiosperms	Eudicots	Anacardiaceae R.Br.	Sorindeia	Species	Sorindeia madagascariensis DC.	Daphnitis madagascarensis Spreng., Mangifera pinnata Desr., Mauria guianensis Brongn. ex Engl., Sorindeia elongata Blume, Sorindeia glaberrima Hassk., Sorindeia goudotii Briq., Sorindeia heterandra Marchand, Sorindeia obtusifoliolata Engl., Sorindeia pinnata Desf., Sorindeia somalensis (Chiov.) Chiov., Sorindeia usambarensis Engl., Bursera acutifolia Sieber ex Steud., Aglaia somalensis Chiov.		Tree			1	1	1		1									Native	Namurracima (NP,macu); Namurracimue (NP,macu); Namurracimué (Z); Narra (Z); Rizimue (CD,macu)		Z: Massingire, Metalola, Alto Molocué, Ile, Mt. Milange, Molumbo, Gúruè, Gilé, Alto Ligonha, Muiane, R. Metausse, Galeria Florestal do R. Molócuè, Metolola, Mocuba, Nangade. NP: Nacala, Netia, Netia, Meconta, Namialo, Monapo, Ribáuè, Nicupi, Serra Chinga, R. Mucasse, Lalaua, R. Lúrio, Malema, Milange. CD: Mecúfi, Mueda, R. Megarama, Quiterajo, Galeria Florestal do R. Ridi, Nagororo, Metuge, Mussa…	TPL, WFO, POWO, FM, GBIF, FZ, LMA, Koning (1993), BNRH, Burrows et al. (2018), K
Angiosperms	Eudicots	Anacardiaceae R.Br.	Trichoscypha	Species	Trichoscypha lucens Oliv.	Pseudospondias luxurians A.Chev., Sorindeia lucens (Oliv.) Marchand, Trichoscypha albiflora Engl., Trichoscypha chevalieri Aubrév. & Pellegr., Trichoscypha coriacea Engl. & Brehmer, Trichoscypha diversifoliolata Van der Veken, Trichoscypha ealaensis Van der Veken, Trichoscypha kwangoensis Van der Veken, Trichoscypha ledermannii Engl. & Brehmer, Trichoscypha liketensis Van der Veken, Trichoscypha …		Tree					1		1	1						LC	Requiring to add Mozambique in the geographic range	Native			Z: Serra Gúruè. NP: Serra Ribáuè, Chinga, (Acampamento base no Cassier). MC: Mutala.	TPL, WFO, POWO, IUCN Red List, LMA
Angiosperms	Eudicots	Anacardiaceae R.Br.	Trichoscypha	Species	Trichoscypha ulugurensis Mildbr.	Trichoscypha silveirana Exell & Mendonça		Tree					1		1									Native			NP: Serra Ribáuè. Z: Serra Gúruè.	TPL, WFO, POWO, GBIF, FZ, FM
Angiosperms	Eudicots	Anisophylleaceae Ridl.	Anisophyllea	Species	Anisophyllea boehmii Engl.	Anisophyllea exellii P.A.Duvign. & Dewit, Anisophyllea gossweileri Engl. & Brehmer		Tree						1										Native			T: Macanga (Furancungo).	FM, FZ, POWO, TPL, WFO, APD, GBIF, LMA, LMU, BNRH, Burrows et al. (2018)
Angiosperms	Magnoliids	Annonaceae Juss.	Annona	Species	Annona muricata L.	Annona bonplandiana Kunth, Annona cearaensis Barb.Rodr., Annona macrocarpa Wercklé, Annona muricata var. borinquensis Morales, Annona muricata f. mirabilis R.E.Fr., Guanabanus muricatus M. Gómez.		Tree												1				Introduced		Food	MP: Jardim Botânico Tunduru.	FM, FZ, POWO, TPL, WFO, APD, JSTOR, GBIF, LMA, LMU, Burrows et al. (2018)
Angiosperms	Magnoliids	Annonaceae Juss.	Annona	Species	Annona reticulata L.	Annona excelsa Kunth, Annona humboldtiana Kunth, Annona humboldtii Dunal, Annona laevis Kunth, Annona longifolia Sessé & Moc., Annona lutescens Saff., Annona primigenia Standl. & Steyerm., Annona reticulata var. primigenia (Standl. & Steyerm.) Lundell, Annona riparia Kunth.		Tree											1	1				Introduced		Food	I: Entre o desligamento de Maxixe e Závora (na EN1). MP: Benfica (Zonas Verdes).	FM, FZ, POWO, TPL, WFO, APD, JSTOR, GBIF, LMA, LMU, BNRH
Angiosperms	Magnoliids	Annonaceae Juss.	Annona	Species	Annona senegalensis Pers.			Shrub			1	1	1	1	1	1	1	1	1	1		LC		Native	Chixanga (MC); Chofa(I); Chova (MP); Lonfa (G,tson); Maiepe (NP); Marompa (MP,rong); Marô-Pa (G); Matope (NI); Muipe (NP); Muipe (NI); Muilbê (Z); Mulembe (T); Mulolo (S); Munrofa (MP,rong); Munroro (MC,sho); Mupousa (T); Mupuza (T); Muroro (MC, sho); Murô:Ro (S); Murrepe (NI); Murôro (MC); M'Poza (T, seng); M'Poza (T,nya); M'Tope (CD,macu); Nrepe (NP,macu); Ntopo (CD,mak); N'Repe (NP,macu); N'Ri…	Food, Handicraft, Medicine	CD: QNP (base do Mt. Mareja, lado NE, cerca de 4 km antes do Campo de Mareja), Entre Muaguide e o cruzamento de estrada Quissanga - Macomia, Mucojo à Quiterajo, Entre Palma e Nangade, Montepuez, Namatuca à Mecaruma, Balama (Chipembe), Pemba, Mueda, Ntotwe, Mocímboa de Praia à Diaca, Planalto de Macondes. NI: Mt. Mecula, Mecula à Matiquite, Metangula (margens do Lago Niassa), Marrupa (Mt. Kuwanku)…	Müller et al. (2012), Timberlake et al. (2007), Timberlake et al. (2009), FZ, POWO, TPL, WFO, APD, GBIF, LMA, LMU, IUCN Red List, Koning (1993), Bandeira et al. (2001), Bruschi et al. (2014), Barbosa et al. (2020), Bruschi et al. (2011), Bandeira et al. (2007), Moura et al. (2018), Santo-António and Goulão (2015), BNRH, Burrows et al. (2018), K
Angiosperms	Magnoliids	Annonaceae Juss.	Annona	Species	Annona squamosa L.	Annona asiatica L., Annona asiatica Vahl, Annona cinerea Dunal, Annona distincta Raeusch., Annona forsskalii DC., Annona glabra Forssk., Annona squamosa Delile, Annona squamosa f. parvifolia Kuntze, Xylopia frutescens Sieber ex C.Presl, Xylopia glabra L., Xylopicron glabrum (L.) Crantz		Shrub											1					Introduced			I: Vilanculos.	POWO, APD, TPL, FM, Burrows et al. (2018)
Angiosperms	Magnoliids	Annonaceae Juss.	Annona	Subspecies	Annona stenophylla Engl. & Diels subsp. nana (Exell) N.Robson	Annona cuneata var. rhodesiaca (Engl. & Diels) R.E. Fr., Annona cuneata var. subsessilifolia (Engl.) R.E. Fr., Annona friesii Robyns & Ghesq., Annona nana Exell, Annona nana var. katangensis Robyns & Ghesq., Annona nana var. oblonga Robyns & Ghesq., Annona nana var. sessilifolia Exell, Annona nana var. subsessilifolia (Engl.) Exell & Mendonça, Annona senegalensis var. rhodesiaca Engl. & Diels, An…		Shrub						1										Introduced		Food, Medicine	T: Angónia (Vila Mouzinho, 'The Tobacco Road', a norte de Furancungo).	FM, FZ, TPL, WFO, APD, JSTOR, GBIF, LMA, LMU, BNRH, Burrows et al. (2018)
Angiosperms	Magnoliids	Annonaceae Juss.	Artabotrys	Species	Artabotrys brachypetalus Benth.	Popowia dicranantha Diels		Shrub			1	1	1	1	1	1	1	1	1	1		LC		Native	À:Rabalala (NP); Chitintane (MP,rong); Gobso (S); Kholongo (T); Kholongodzi (T); Matita (MP,rong); Mecocho (MC); Muchogo (MC,sho); Mucologua (Z); Mucorongose (T); Mucosho (MC,sho); Mufasi (S); Mukogwa (MC,sho); Munchongo (MC,sho); Murologua (Z); Mutengooyanga (T,nya); Mutiti (G); M'Colongose (T,sho); Napuconapuco (NP,macu); Napukanapuka (NP); Nicoloco (Z); Nicologa (Z); Nicologue (Z); Nkolonga (Z…	Food, Medicine	CD: Namatuca à Mecaruma, Taratibu Bush Camp. NI: Mbuna Bay Lodge, Serra Mecopo, Majune, REN (Metapiri, ao longo do rio Lugenda). NP: Entre Angoche e Namaponda, Nacala, Posto Agrícola de Ribáuè, Entre Quixaxe e Liúpo, Lalaua, Entre Nampula e Ribáuè, Posto Agrícola de Ribáuè, Entre Moma e Boíla, Monapo (Reserva Florestal do Sr. Wolf). T: Tete, Chicoa, Furancungo, Màgoé-Novo, Songo, Estima à Candodo…	FZ, POWO, TPL, WFO, APD, GBIF, LMA, LMU, IUCN Red List, Koning (1993), Bruschi et al. (2014), Barbosa et al. (2020), Bruschi et al. (2011), Santo-António and Goulão (2015), BNRH, Burrows et al. (2018), K
Angiosperms	Magnoliids	Annonaceae Juss.	Artabotrys	Subspecies	Artabotrys modestus Diels subsp. macranthus Verdc.			Herb	Climber	Perennial	1											LC	Requiring to add Mozambique in the geographic range	Native			CD: Floresta Namacubi (Banana), a oeste de Quiterajo.	FM, FZ, POWO, IUCN Red List, TPL, WFO, APD, JSTOR, GBIF, LMA, LMU, BNRH, K
Angiosperms	Magnoliids	Annonaceae Juss.	Artabotrys	Species	Artabotrys monteiroae Oliv.	Artabotrys mabifolius Diels, Artabotrys mabifolius f. intermidus Cavaco & Keraudren, Artabotrys mabifolius f. villosus Cavaco & Keraudren, Artabotrys nitidus Engl., Artabotrys stolzii Diels.		Shrub			1	1	1	1		1	1	1	1	1		LC		Native	Muwongowongo (T); Okonjowati (MP,rong)	Food	CD: Macondes, Entre Mueda e Nangade. NI: Norte de Mandimba. NP: Serra chinga 1. T: Angónia (Vila Mouzinho; Ulónguè). S: Savane, Dondo, 30 km da Beira, Floresta Madanda (entre Chitobe e Muxúngue). MC: Muninga, Serra Choa. I: Temane (Inhassoro). G: Floresta Sagrada de Chirindzene,Chongoene à Chibuto, Praia de Bilene à Macia, Entre Macia e Xai-Xai, Entre Alto Changane e Chibuto. MP: Tinonganine à Fr…	FZ, POWO, TPL, WFO, APD, GBIF, LMA, LMU, IUCN Red List, Koning (1993), BNRH, Burrows et al. (2018), Wursten et al. (2017)
Angiosperms	Magnoliids	Annonaceae Juss.	Cananga	Species	Cananga odorata (Lam.) Hook.f. & Thomson	Canangium odoratum (Lam.) Baill. ex King, Unona odorata (Lam.) Baill., Uvaria javanica Thunb., Uvaria odorata Lam.		Tree			1				1					1				Introduced	Camanga (Z)	Food, Medicine	CD: Entre Ingoane e Quiterajo Z: Posto Agrícola de Mocuba, Maganja da Costa (Regulo Mazo, a 30,2 km do Rio Raraga). MP: Estação Agrária de Umbelúzi, Jardim Botânico Tunduru.	POWO, Da Silva et al. (2004), TPL, WFO, APD, GBIF, LMA, Koning (1993)
Angiosperms	Magnoliids	Annonaceae Juss.	Cleistochlamys	Species	Cleistochlamys kirkii (Benth.) Oliv.	Popowia kirkii Benth.		Shrub			1	1	1	1	1	1	1	1	1	1		LC		Native	Kholongo (T); Munhangolo (T); Mumbjinda (MC); Munhangôro, Munhangore (X); Munhangoro (S); Mungongôro (S); Nungororo (S); Muropé (NP); Mutarara (Z); Muvinda (S); Nacuva (NI); Ncolongo (T); Nhongolo (S); Nhogôlo (S); Nielenge (T, sho); Ningôloco (T); Psirritssi (I); Suerriti (I); Tauara (X).	Handicraft, Food, Medicine	CD: Floresta Sagrada, a oeste de Quiterajo. NI: Mandimba. NP: Ribáuè, Moma, Mutuáli (Serra Cuculeia, quedas do R. Neuce), Entre Nacarôa e Namapa, Umpuhua, Serra Mepalué, Lalaua (próx. do Mt. Titialo), Lumbo, R. Mutivasse. T: Mutarara Nova, Entre Mutarara Velha e o Sinjal, Estima (R. Sanangoé), Wiriamo (próximo do rio Cassendje), Zóbuè, Ao km 148 do caminho de ferro, Cahora Bassa, Margens do rio M…	FZ, POWO, TPL, WFO, APD, GBIF, LMA, LMU, IUCN Red List, Koning (1993), Bruschi et al. (2014), Bruschi et al. (2011), Santo-António and Goulão (2015), BNRH, Burrows et al. (2018), K
Angiosperms	Magnoliids	Annonaceae Juss.	Dielsiothamnus	Species	Dielsiothamnus divaricatus (Diels) R.E.Fr.	Uvaria divaricata Diels		Shrub			1	1	1		1						NE	LC		Native		Food, Medicine	CD: Namatuca, Mt. Nametil, Quiterajo. NI: Marrupa. NP: Entre Imala e Mecubúri, Em direcção ao Mt. Napitu, Namapa à Nacarôa(monte Muchamapa), entre Nampula e Lumbo, Entre Nampula e Ribáuè. Z: Morrumbala.	FM, FZ, POWO, IUCN Red List, TPL, WFO, APD, JSTOR, GBIF, LMA, LMU, BNRH, Burrows et al. (2018), K
Angiosperms	Magnoliids	Annonaceae Juss.	Hexalobus	Species	Hexalobus monopetalus (A.Rich.) Engl. & Diels	Hexalobus glabrescens Hutch. & Dalziel, Hexalobus huillensis (Engl. & Diels) Engl. & Diels, Hexalobus senegalensis A.DC., Hexalobus tomentosus A.Chev., Uva huillensis (Engl. & Diels) Kuntze, Uvaria huillensis Engl. & Diels, Uvaria monopetala A.Rich.		Shrub			1	1	1	1		1						LC		Native	Bacala (CD,macu); Gininge (T,sho); Njocella (CD,macu); Njocolla (CD,macu); Rituanda (NP); Pacala (CD,macu); Psirretse (I,tswa)	Food, Fuel, Handicraft	CD: QNP (Taratibu Bush Camp), Mt. Cherimpo, Mt. Miquita (norte de Ancuabe), Macuce (ao longo do rio Umputo). NI: Marrupa à Lichinga, Lulimbo, Cuamba. NP: Lalaua, Rio Meti ao Mt. Ripili, Serra Ribáuè. T: Songo, Chicoa à Fíngoè. MC: Chimoio (margens de Revuè), Báruè, CNR (Área de Nhahomba), Entre Chimoio e Garuso.	FM, FZ, POWO, IUCN Red List, TPL, WFO, APD, JSTOR, GBIF, LMA, LMU, Koning (1993), Santo-António and Goulão (2015), BNRH, Burrows et al. (2018)
Angiosperms	Magnoliids	Annonaceae Juss.	Hexalobus	Species	Hexalobus mossambicensis N.Robson			Shrub			1		1								E	VU		Native	Lonti (NP,macu); Melonzii (NP,macu); Nencolo )Np); Nencopilo (NP); N'Lonki (NP,macu)	Food	CD: QNP, Quiterajo, Nangade, Entre Muaguide e Panguia, Entre Quiterajo e R. Messalo, Mocímboa da Praia. NP: Nampula, I. Mafamede, Angoche, Mossuril (Reserva Florestal de Mecrusse de Matibane, Entre Nacala e Quissangulo.	FM, FZ, POWO, TPL, WFO, APD, GBIF, LMA, LMU, Darbyshire et al. (2019), IUCN Red List, Koning (1993), Burrows et al. (2018), K
Angiosperms	Magnoliids	Annonaceae Juss.	Huberantha	Species	Huberantha mossambicensis (Vollesen) Chaowasku	Hubera mossambicensis (Vollesen) Chaowasku, Polyalthia mossambicensis Vollesen		Shrub							1						E			Native			Z: Floresta de Gobene (Maganja da Costa).	FM, FZ, POWO, TPL, WFO, APD, GBIF, LMA, LMU, Darbyshire et al. (2019), Burrows et al. (2018), K
Angiosperms	Magnoliids	Annonaceae Juss.	Lettowianthus	Species	Lettowianthus stellatus Diels			Tree				1										LC	Requiring to add Mozambique in the geographic range	Native			NI: REN (Na margem do rio Lugenda, no centro ambiental do Mariri).	FZ, POWO, TPL, WFO, APD, GBIF, LMA, LMU, IUCN Red List, Burrows et al. (2018), K
Angiosperms	Magnoliids	Annonaceae Juss.	Monanthotaxis	Species	Monanthotaxis buchananii (Engl.) Verdc.	Popowia buchananii (Engl.) Engl. & Diels, Unona buchananii Engl.	Popowia djurensis Engl. & Diels	Shrub			1	1	1	1	1		1			1				Native		Food, Medicine	CD: Quissenge (Zona de Lule), Ilha de Vamizi, Trilho para Nhica do Rovuma (a partir da estrada Palma-Pundanhar). NI: Metangula, Nas margens do Rio Messalo (entres Montanhas Mirenge e Mucuwango). NP: Serra Chinga, Lalaua (Galeria florestal do rio Muire), Monapo (Reserva Florestal do Sr. Wolf), Serra Mecopo, Mt. Nairuco. T: Vale Ngami. Z: Mucôto (Entre R. Ligonha e Serra Gúruè), Maganja da Costa, N…	FZ, POWO, TPL, WFO, APD, GBIF, LMA, LMU, BNRH, Burrows et al. (2018), K
Angiosperms	Magnoliids	Annonaceae Juss.	Monanthotaxis	Species	Monanthotaxis caffra (Sond.) Verdc.	Guatteria caffra Sond., Popowia caffra (Sond.) Hook.f. & Thomson ex Benth., Unona caffra E.Mey. ex Müll.Berol.		Shrub							1			1		1				Native	Cherepse (T, tswa); Chicuhlula (G); Lochentima (MP,rong); Loxentima (MP,rong); Lhucunlhuana (MP); Nankwankule (NP,macu); Sefu (NP,macu)	Food, Medicine	Z: Maganja da Costa. G: Entre Xai-Xai e Lumane, Barra do Limpopo (a 3 km de Gumbe). MP: Ponta do Mar, Jardim Botâncio do IIAM, Marracuene à Manhica (Ilha de Chifucindze), Ricatla, Matutuíne (Salamanga, Floresta de Magala; Santaca, próximo de Madebula), Entre Goba e Bela Vista, Costa de Sol, Baía de Maputo, Ilha de Inhaca, Matola-Gare, Moamba.	FZ, POWO, TPL, WFO, APD, GBIF, LMA, LMU, Koning (1993), Conde et al. (2014), Manuel et al. (2020), Burrows et al. (2018)
Angiosperms	Magnoliids	Annonaceae Juss.	Monanthotaxis	Species	Monanthotaxis chasei (N. Robson) Verdc.	Popowia chasei N. Robson		Shrub					1		1	1								Native	Mutadza (MC)		NP: Serra Ribáuè. Z: morrumbala. MC: Bepete (Comunidade de Zomba, Sussundenga), Serra Nharo-Nharo, Serra Garuso.	FZ, POWO, TPL, WFO, APD, GBIF, LMA, LMU, Koning (1993), Burrows et al. (2018)
Angiosperms	Magnoliids	Annonaceae Juss.	Monanthotaxis	Species	Monanthotaxis maputensis P.H.Hoekstra			Shrub										1	1	1	NE			Native			I: Pomene. G: Gumbe, Macia à Messano, Xai-Xai à Lumane. MP: Matola Gare à Moamba, I. Inhaca, REM, Marracuene (Bobole; Floresta de Muntanhane), Catembe, Mazeminhama, Chinhanguanine, Marracuene, Salamanga (floresta de Magala).	FM, FZ, POWO, TPL, WFO, APD, GBIF, LMA, LMU, Darbyshire et al. (2019), Burrows et al. (2018), K
Angiosperms	Magnoliids	Annonaceae Juss.	Monanthotaxis	Species	Monanthotaxis obovata (Benth.) P.H.Hoekstra	Friesodielsia obovata (Benth.) Verdc., Popowia obovata (Benth.) Engl. & Diels, Popowia stormsii De Wild., Unona obovata Benth.		Shrub			1	1	1	1	1	1	1					LC		Native	Chinga (S); Mechinha (MC); Meginga (MC); Munchinga (MC); Munziga (S); Muyanyachoco (X); M'Chinga (S); Naiyako (CD, macu); Najako (CD,maku); Niaku (CD); N'Chinga(T); Utchinga (X)	Food, Medicine	CD: Namatuca à Mecaruma, Chiúre (Nametil). NI: Marrupa (Mt. Kuwanku), REN (Metapiri, ao longo do rio Lugenda). NP: Entre Nampula e Meconta. T: Furancungo, Serra Songo, Entre Maroeira e Songo, Estima, Cahora Bassa (Mt. Morumbue), Chicoa à Chioco, Entre Chioco e Tete, Km 148 dos Caminhos de Ferro, Serra Caroeira. Z: Morrumbala. S: Caia, Nhambita, Levasflor, Mucoza, Dondo, Inhamitanga, Inhaminga, Ma…	FZ, POWO, IUCN Red List, TPL, WFO, APD, JSTOR, GBIF, LMA, Koning (1993), Bruschi et al. (2011), Santo-António and Goulão (2015), BNRH, Burrows et al. (2018)
Angiosperms	Magnoliids	Annonaceae Juss.	Monanthotaxis	Species	Monanthotaxis suffruticosa P.H.Hoekstra			Shrub			1		1								NE	VU		Native			CD: Palma. NP: Monapo (Reserva Florestal do Sr. Wolf).	FM, FZ, POWO, IUCN Red List, TPL, WFO, APD, JSTOR, GBIF, LMA, LMU, Darbyshire et al. (2019), Burrows et al. (2018), K
Angiosperms	Magnoliids	Annonaceae Juss.	Monanthotaxis	Species	Monanthotaxis trichantha (Diels) Verdc.	Popowia buchananii var. trichantha Diels, Popowia trichantha (Diels) R.E.Fr.		Shrub			1		1								NE	VU	Requiring to add Mozambique in the geographic range	Native			CD: Quiterajo (Floresta Miparawa), Nangade, Palma. NP: Reserva Florestal de Matibane (Mossuril).	FM, FZ, POWO, TPL, WFO, APD, GBIF, LMA, LMU, Darbyshire et al. (2019), IUCN Red List, BNRH, Burrows et al. (2018), K
Angiosperms	Magnoliids	Annonaceae Juss.	Monanthotaxis	Species	Monanthotaxis trichocarpa (Engl. & Diels) Verdc.	Popowia trichocarpa Engl. & Diels		Shrub					1		1	1	1					LC		Native			NP: Monapo (Reserva Florestal do Sr. Wolf). Z: Namagoa. S: GNP (Desfiladeiro "Zamambo"), Muanza - Chinizíua, Rio Savane (norte da Beira), Cheringoma (a sul de Levasflor, perto do rio Chinizíua). MC: Reserva Florestal de Moribane (Ndzou camp), Gondola (rio Nhamissangue).	FM, FZ, POWO, TPL, WFO, APD, JSTOR, GBIF, LMA, LMU, IUCN Red List, BNRH, Burrows et al. (2018), K
Angiosperms	Magnoliids	Annonaceae Juss.	Monodora	Species	Monodora carolinae Couvreur			Shrub			1										NE	EN		Native			CD: Planlato de Mueda.	FM, FZ, POWO, TPL, WFO, APD, GBIF, LMA, LMU, Darbyshire et al. (2019), IUCN Red List, Burrows et al. (2018), K
Angiosperms	Magnoliids	Annonaceae Juss.	Monodora	Species	Monodora grandidieri Baill.	Monodora somalensis Chiov., Monodora stocksii Sprague, Monodora veithii Engl. & Diels.		Shrub			1	1	1									LC		Native	Kuripiassa (CD,macu)		CD: Taratibu Bush Camp, QNP (Mt. Mareja), Mecúfi, Namatuca à Mecaruma. NI: REN (Metapiri, ao longo do R. Lugenda), Marrupa. NP: Lalaua, Murrupula (margens do rio Mutivasse), Entre Namapa e Posto do Lúrio.	FZ, POWO, TPL, WFO, APD, GBIF, LMA, LMU, IUCN Red List, Koning (1993), BNRH, Burrows et al. (2018), K
Angiosperms	Magnoliids	Annonaceae Juss.	Monodora	Variety	Monodora junodii Engl. & Diels var. junodii			Shrub			1	1	1	1	1		1	1	1	1				Introduced	Corâ (MP,rong); Côra (MP); Icurri (I,tswa); Kuripiassa (CD,macu); Michinga (T); Mussicossico (S); M'Siui (S ); N'Chinga (T ); N'Chinga (X); Ungotehe (MP,tson)		CD: Palma à Mocímboa da Praia, Taratibu Bush Camp, Montepuez à Nantulo, Namatuca (Mt. Nametiri). NI: REN (Metapiri, ao longo do rio Lugenda), Lurio à Tchamba, Amaramba (entre Chamba e o rio Lucasse). NP: Nameluco à Muhala, Nametil à Muatua. T: Vale do R. Chire, Chicoa e Mágoè, Margem direita do rio Sanangoe, Cahora Bassa, Estima à Candodo. Z: Maganja da Costa (floresta de Gobene, próx. da praia R…	FM, FZ, POWO, TPL, WFO, APD, JSTOR, GBIF, LMA, LMU, Koning (1993), BNRH, Burrows et al. (2018), K
Angiosperms	Magnoliids	Annonaceae Juss.	Monodora	Variety	Monodora junodii Engl. & Diels var. kathyae Lötter & Deroin			Shrub																Native			Locality not known.	POWO, TPL, APD
Angiosperms	Magnoliids	Annonaceae Juss.	Monodora	Species	Monodora minor Engl. & Diels			Shrub			1											NT		Native			CD: Palma à Quionga, Planlato de Mueda.	FZ, POWO, TPL, WFO, APD, GBIF, LMA, LMU, IUCN Red List, BNRH, Burrows et al. (2018), K
Angiosperms	Magnoliids	Annonaceae Juss.	Monodora	Species	Monodora stenopetala Oliv.			Shrub						1			1				NE	VU		Native	Mutchinga(T); M'Sini (S); M'Siui (S); Tchinga (T)		T: Cahora Bassa, Mutarara (Baúe), Daque à Cachomba. S: M'Phingwe Camp, Inhamitanga à Chupanga, Entre Massara e o rio Nhandué, Maringué, Inhamitanga, GNP (Mt. Bunga), Coutada 12 (Ao longo da estrada ao norte de Chironde Camp à floresta de Inhamitanga), Concessão Catapu (+/- 30 km a sul de Caia).	FM, FZ, POWO, TPL, WFO, APD, GBIF, LMA, LMU, Darbyshire et al. (2019), IUCN Red List, Koning (1993), BNRH, Burrows et al. (2018)
Angiosperms	Magnoliids	Annonaceae Juss.	Ophrypetalum	Species	Ophrypetalum odoratum Diels			Shrub			1											NT	Requiring to add Mozambique in the geographic range	Native			CD: Quiterajo.	FM, POWO, APD, TPL, Burrows et al. (2018), IUCN Red List, K
Angiosperms	Magnoliids	Annonaceae Juss.	Sphaerocoryne	Subspecies	Sphaerocoryne gracilis (Oliv. ex Engl. & Diels) Verdc. subsp. gracilis			Shrub			1			1	1	1	1	1	1	1				Native	Macava (NI); Machajaria (G); Meparanhanga (S); Mpope (CD); Mutandana (Z); Sanzava (S)		CD: Entre Pebane e Mualama, Ntotwe, Nhanga, Palma (ao longo do caminho para o farol de Cabo Delgado), Macomia (entre Ingoane e Quiterajo). T: Màgoé para Mecumbura. Z: Mutange, Maganja da Costa (Régulo Muza). S: Muanza, Urema, Cheringoma (Serração Dururndi; Entre Dondo e Senacuesa), Beira (próx. de Dondo). MC: Floresta Maronga. I: Macovane, Pomene, Panda, Maimelane. G: Entre Banhine e Massucana, C…	FZ, POWO, FM, APD, GBIF, LMA, LMU, Koning (1993), BNRH, Burrows et al. (2018), K
Angiosperms	Magnoliids	Annonaceae Juss.	Uvaria	Species	Uvaria acuminata Oliv.	Uva acuminata Kuntze, Uvaria holstii Engl.		Tree			1	1	1		1							LC		Native		Medicine	CD: Diaca à Macomia, Quiterajo (Floresta Namacubi "Banana"; Campo da pista de aterragem), Muncuto, Nangade à Palma, R. Rovuma, Palma à Quionga, 28 km ao sul de Mocímboa da Praia. NI: Maniamba. NP: Nacala. Z: Entre Namacurra e Maganja da Costa.	FZ, POWO, TPL, WFO, APD, GBIF, LMA, LMU, IUCN Red List, BNRH, Burrows et al. (2018), K
Angiosperms	Magnoliids	Annonaceae Juss.	Uvaria	Species	Uvaria caffra E. Mey. ex Sond.	Uva caffra Kuntze		Shrub										1	1	1		LC		Native		Food	G: Limpopo. I: Nhachengue. MP: Baía de Maputo, REM ( cerca de 5 km do acampamento), Ponta Milibangalala, Zona entre Avenida Friedrich Engels e Avenida Marginal, Entre Catuane e Santaca; Próx. do R. Fúti, Marracuene.	FM, FZ, POWO, IUCN Red List, TPL, WFO, APD, JSTOR, GBIF, LMA, LMU, Santo-António and Goulão (2015), Burrows et al. (2018)
Angiosperms	Magnoliids	Annonaceae Juss.	Uvaria	Species	Uvaria gracilipes N.Robson			Shrub					1				1	1	1					Native	Cajanyaya (I,tswa); Chititarra (G); Tchitchanjoana (X, tswa)		NP: Nacala (bairro Nihaca, próx. a Nawowane). S: Ao longo da EN1 (6 km ao sul de Mavanza). I: Ponta Závora, Pande (Inhassoro), Banamana à Machaíla, Mapinhane, Massinga à Vilanculos, Nhachengue. G: Caniçado à Lagoa Nova.	FZ, POWO, TPL, WFO, APD, GBIF, LMA, LMU, Koning (1993), BNRH, Burrows et al. (2018)
Angiosperms	Magnoliids	Annonaceae Juss.	Uvaria	Species	Uvaria kirkii Oliv. ex Hook.f.	Uvaria stuhlmannii Engl.		Shrub			1		1									NT		Native	O'Sofu (NP,macu); Sofu (NP,macu).		CD: Quionga ao ferry-boat do Rovuma, Quiterajo (Floresta Miparawa), R. Messalo, Mocímboa da Praia. NP: Mossuril (Reserva Florestal de Matibane).	FZ, POWO, TPL, WFO, APD, GBIF, LMA, LMU, IUCN Red List, Koning (1993), BNRH, Burrows et al. (2018), K
Angiosperms	Magnoliids	Annonaceae Juss.	Uvaria	Species	Uvaria leptocladon Oliv.			Shrub			1											LC	Requiring to add Mozambique in the geographic range	Native			CD: Floresta Namacubi, Quiterajo.	FM, FZ, POWO, IUCN Red List, TPL, WFO, APD, JSTOR, GBIF, LMA, LMU, Burrows et al. (2018)
Angiosperms	Magnoliids	Annonaceae Juss.	Uvaria	Subspecies	Uvaria lucida Bojer ex Benth. subsp. virens (N.E.Br.) Verdc.	Uvaria gazensis Swynn. & Baker f., Uvaria nyassensis Engl. & Diels, Uvaria virens N.E.Br.		Shrub				1	1		1	1	1	1	1	1				Native	Osofu(NP, macu); Osotu(NP, macu)		NI: Nas margens do Rio Messalo (entres Montanhas Mirenge e Mucuwango). NP: Reserva Florestal de Matibane, Ribáuè à Lalaua (margens do R. Mutacusse). Z: Maganja da Costa à Mocuba. S: Pedreira de Muanza. MC: Serra Choa. I: Mapinhane, Mapinhane à Funhalouro. G: Chibuto, Guij. MP: Goba (Fonte Libombos), Alvor à Moamba, Chinhanguanine, Bela Vista (próx. da Serração Portugal).	FZ, POWO, TPL, WFO, APD, GBIF, LMA, LMU, Koning (1993), BNRH, Burrows et al. (2018), K
Angiosperms	Magnoliids	Annonaceae Juss.	Uvaria	Species	Uvaria rovumae Deroin & Lötter			Liana			1										E	CR		Native			CD: Nangade.	FM, FZ, POWO, TPL, WFO, APD, GBIF, LMA, LMU, Darbyshire et al. (2019), IUCN Red List, BNRH, K
Angiosperms	Magnoliids	Annonaceae Juss.	Uvaria	Species	Uvaria scheffleri Diels			Shrub																Native			Northern Mozambique.	FM, FZ, POWO, TPL, WFO, APD, JSTOR, GBIF, LMA, LMU, Burrows et al. (2018)
Angiosperms	Magnoliids	Annonaceae Juss.	Uvaria	Species	Uvaria tanzaniae Verdc.			Shrub			1											VU	Requiring to add Mozambique in the geographic range	Native			CD: Mueda, Nangade.	FM, FZ, POWO, IUCN Red List, TPL, WFO, APD, JSTOR, GBIF, LMA, LMU
Angiosperms	Magnoliids	Annonaceae Juss.	Uvariodendron	Species	Uvariodendron mossambicense Dagallier, sp. nov.			Tree								1								Native			MC: Cataratas do Rio Révuè.	JSTOR
Angiosperms	Magnoliids	Annonaceae Juss.	Xylopia	Species	Xylopia aethiopica (Dunal) A.Rich.	Annona aethiopica (Dunal) Steud., Habzelia aethiopica (Dunal) A.DC., Habzelia aethiopica DC., Unona aethiopica Dunal, Uvaria aethiopica (Dunal) A.Rich., Xylopia dekeyzeriana De Wild., Xylopia eminii Engl., Xylopia gilletii De Wild., Xylopicrum aethiopicum (Dunal) Kuntze.		Shrub			1		1		1		1					LC		Native	Mpesa (S); Mujeleli (Z); M'Pesa (MC); M'Peza (S)		CD: Entre Mueda e Chomba. NP: Serra Chinga (1 e 2, Rio Mucasse), Serra Mepalué. Z: Mt. Mabu, Entre Tacuane e Limbué. S: Cheringoma (Floresta de Macuácua), Dondo (Serração de Inhansato, de Cardoso & Lopes).	FZ, POWO, TPL, WFO, APD, GBIF, LMA, LMU, IUCN Red List, Koning (1993), Burrows et al. (2018), K
Angiosperms	Magnoliids	Annonaceae Juss.	Xylopia	Species	Xylopia collina Diels	Xylopia latipetala Verdc.		Shrub			1											NT		Native			CD: 6 km a sul de Palma, Acampamento em Dambo ao sul da vila de Nhica do Rovuma, Palma à Quionga, Negomano, Entre Mueda e Chomba.	FZ, POWO, TPL, WFO, APD, GBIF, LMA, LMU, IUCN Red List, BNRH, Burrows et al. (2018), K
Angiosperms	Magnoliids	Annonaceae Juss.	Xylopia	Species	Xylopia gracilipes D.M.Johnson & N.A.Murray			Tree			1				1	1						LC		Native			CD: Metoro, Namatuca. Z: Alto Molócuè, Gilé, Estrada de entrada para Casa Branca (ca. 82 km de Nicoadala pela estrada do Caia). MC: Espungabera.	FZ, POWO, TPL, WFO, APD, GBIF, LMA, LMU, IUCN Red List, BNRH, K
Angiosperms	Magnoliids	Annonaceae Juss.	Xylopia	Species	Xylopia longipetala De Wild. & T. Durand	Coelocline parviflora (A.Rich.) A.DC., Uvaria parviflora A.Rich., Xylopia parviflora Vallot, Xylopia parviflora (A.Rich.) Benth., Xylopicrum parviflorum (A.Rich.) Kuntze		Tree			1		1		1	1	1					LC	Requiring to add Mozambique in the geographic range	Native	Garangerere (MC); Lutanda (S); Mugarangerere (MC,sho); Muinlaniè (NP); Mukaramo (NP); Mulalabungo (S); Murikiriki (NP); Mussaguessague (Z); Nambuadji (Z); Njonjono (NP); Rutanda (S); Sângue (Z)		CD: Palma, Namacuta. NP: Serra Chinga, Entre Muáge e Umpuhua para o Mt. Titialo. Z: Nante, Maganja da Costa, Namacurra (próx. de Naciaia), Entre Mocuba e Quelimane, Alto Molócuè para o R. Nipiode, Bajone (entre Namuera e Murroa). S: Gorongosa, Cheringoma. MC: Revuè, Mossurize, Espungabera (próx. da Missão Católica), Dombe (Serração Braunstein à Machango; Entre Javera e Machire), Gondola (Floresta…	FM, POWO, IUCN Red List, TPL, WFO, APD, JSTOR, LMA, Koning (1993), K
Angiosperms	Magnoliids	Annonaceae Juss.	Xylopia	Species	Xylopia lukei D.M.Johnson & Goyder			Tree			1										NE	EN		Native			CD: Palma, Pandanhar à Nangade, Quionga à Nachindundo.	FM, FZ, POWO, TPL, WFO, APD, GBIF, LMA, LMU, Darbyshire et al. (2019), IUCN Red List, BNRH, Burrows et al. (2018), K
Angiosperms	Magnoliids	Annonaceae Juss.	Xylopia	Species	Xylopia rubescens Oliv.	Xylopia batesii Pierre ex Engl. & Diels, Xylopia butayei De Wild., Xylopia gossweileri Exell, Xylopia humilis Engl. & Diels, Xylopia klaineana Pierre ex Engl. & Diels, Xylopia zenkeri Engl. & Diels, Xylopicrum rubescens (Oliv.) Kuntze		Tree														LC		Native			Northern Mozambique.	FM, FZ, POWO, IUCN Red List, TPL, WFO, APD, JSTOR, GBIF, LMA, LMU, Burrows et al. (2018)
Angiosperms	Magnoliids	Annonaceae Juss.	Xylopia	Species	Xylopia tenuipetala D.M.Johnson & Goyder			Tree			1										E	EN		Native			CD: Quiterajo (Floresta Namacubi), Palma, Península de Afungi.	FM, FZ, POWO, TPL, WFO, APD, GBIF, LMA, LMU, Darbyshire et al. (2019), IUCN Red List, BNRH, Burrows et al. (2018), K
Angiosperms	Magnoliids	Annonaceae Juss.	Xylopia	Species	Xylopia torrei N.Robson			Shrub					1					1	1	1	E	EN		Native			NP: Monapo (Itoculo à Nacala). I: Homoíne, Panda. G: Chibuto. MP: Bela Vista, Reserva Florestal de Licuáti.	FM, FZ, POWO, TPL, WFO, APD, GBIF, LMA, LMU, Darbyshire et al. (2019), IUCN Red List, BNRH, Burrows et al. (2018), K
Angiosperms	Eudicots	Aphloiaceae Takht.	Aphloia	Species	Aphloia theiformis (Vahl) Benn.	Aphloia integrifolia (Vahl) Benn., Aphloia madagascariensis Clos, Aphloia mauritiana Baker, Aphloia minima Baker, Aphloia myrtiflora Galpin, Aphloia sessilifolia (Baker) Hemsl., Aphloia seychellensis (Clos) Hemsl., Aphloia theiformis var. seychellensis (Clos) F.Friedmann, Neumannia deltoidea Warb., Neumannia integrifolia (Vahl) A.Rich., Neumannia madagascariensis (Clos) Warb., Neumannia minima (B…		Tree							1	1	1					LC		Native	Mussicate (S); Sicati (MC)		S: Serra Gorongosa. MC: CNR, Mts Chimanimani. Z: Milange, Mt. Tumbine.	Müller et al. (2012), Timberlake et al. (2009), GBIF, POWO, IUCN Red List, TPL, WFO, LMA, Koning (1993), BNRH, Burrows et al. (2018), K, Wursten et al. (2017)
Angiosperms	Eudicots	Apiaceae Lindl.	Afroligusticum	Species	Afroligusticum claessensii (C.Norman) P.J.D.Winter	Peucedanum claessensii C.Norman, Peucedanum valerianifolium Baker.		Herb		Perennial		1			1	1								Native			NI: Lichinga. Z: Serra Chiperone, Serra Tumbine. MC: Mavita (Vale do R. Messambuzi), Serra Zuira, Planalto Tsetsera.	FM, FZ, POWO, TPL, WFO, APD, GBIF, LMA, LMU
Angiosperms	Eudicots	Apiaceae Lindl.	Afroligusticum	Species	Afroligusticum linderi (C.Norman) P.J.D.Winter	Lefebvrea cardiocarpa Gilli, Peucedanum aberdaricum Chiov., Peucedanum linderi C.Norman.		Herb		Perennial						1	1					LC		Native			S: Serra Gorongosa (Mt. Nhandore; Mt. Gogógo). MC: Tsetsera.	FM, FZ, POWO, TPL, WFO, APD, GBIF, LMA, LMU, IUCN Red List
Angiosperms	Eudicots	Apiaceae Lindl.	Afrosciadium	Species	Afrosciadium eylesii (C.Norman) P.J.D.Winter	Peucedanum eylesii Norman		Herb		Perennial					1	1								Native			Z: Serra Gúruè, Mt. Namuli, Picada para a Sociedade de" Chá de Moçambique". MC: Rotanda, Tandara.	FM, FZ, POWO, TPL, WFO, APD, GBIF, LMA, LMU
Angiosperms	Eudicots	Apiaceae Lindl.	Afrosciadium	Species	Afrosciadium nyassicum (H. Wolff) P. Winter	Peucedanum doctoris C.Norman, Peucedanum monticola C.Norman, Peucedanum nyassicum H.Wolff		Herb		Perennial					1							DD		Native			Z: Mt. Namuli.	POWO, TPL, APD, GBIF, LMA, IUCN Red List
Angiosperms	Eudicots	Apiaceae Lindl.	Afrosciadium	Species	Afrosciadium rhodesicum (Cannon) P.J.D.Winter	Peucedanum rhodesicum Cannon		Herb		Perennial						1					NE	VU		Native			MC: Rotanda, Tandara.	FM, FZ, POWO, TPL, WFO, APD, GBIF, LMA, LMU, Darbyshire et al. (2019), IUCN Red List, K, Wursten et al. (2017)
Angiosperms	Eudicots	Apiaceae Lindl.	Alepidea	Species	Alepidea amatymbica Eckl. & Zeyh.	Eryngium amathymbicum (Eckl. & Zeyh.) Koso-Pol.		Herb		Perennial		1				1								Native		Medicine	NI: Lichinga. MC: Tsetsera.	FM, FZ, POWO, TPL, WFO, APD, GBIF, LMA, LMU, Bandeira et al. (2001), Ribeiro et al. (2010), Wursten et al. (2017)
Angiosperms	Eudicots	Apiaceae Lindl.	Alepidea	Species	Alepidea cordifolia B.-E.van Wyk			Herb		Perennial							1							Native			S: Gorongosa.	FM, FZ, POWO, TPL, WFO, APD, GBIF, LMA, LMU
Angiosperms	Eudicots	Apiaceae Lindl.	Alepidea	Species	Alepidea peduncularis Steud. ex A.Rich.	Alepidea coarctata Dummer, Alepidea congesta Schltr. & H.Wolff, Alepidea fischeri (Engl.) Schltr. & H.Wolff, Alepidea gracilis Dummer, Alepidea gracilis var. major Weim., Alepidea longifolia subsp. coarctata (Dummer) Weim., Alepidea longifolia subsp. propinqua (Dummer) Weim., Alepidea longifolia subsp. swynnertonii (Dummer) Weim., Alepidea massaica Schltr. & H.Wolff, Alepidea peduncularis var. fi…		Herb		Perennial		1	1	1	1	1	1			1				Native		Beliefs	NI: Lichinga. NP: Serra Ribáuè (Mepalué). T: Ulónguè à Tete(entre os rios Limbune e Namanzi). Z: Serra Gúruè, Mt. Namuli. S: Serra Gorongosa (Mt. Nhandore). MC: CNR (Ao longo do caminho para o Mt. Binga antes da travessia do rio Nhamadzi), Mts Chimanimani, Macequece, Serra Vumba, Serra Choa, Tsetsera. MP: Estrada para Mt. M'Ponduine.	Müller et al. (2012), Timberlake et al. (2009), FM, FZ, POWO, TPL, WFO, APD, GBIF, LMA, LMU, K, Wursten et al. (2017)
Angiosperms	Eudicots	Apiaceae Lindl.	Anethum	Species	Anethum graveolens L.	Anethum arvense Salisb., Anethum graveolens var. anatolicum N.F.Koren', Anethum graveolens subsp. australe N.F.Koren', Anethum graveolens var. chevallieri Maire, Anethum graveolens var. copiosum N.F.Koren', Anethum graveolens var. nanum N.F.Koren', Anethum graveolens var. parvifolium N.F.Koren', Anethum graveolens var. tenerifrons N.F.Koren', Angelica graveolens (L.) Steud., Ferula graveolens (L.…	Pastinaca anethum Spreng., Peucedanum anethum Jess.	Herb		Annual								1		1				Introduced	Djindjara (G)		G: Chibuto (Baixo Changane). MP: Entre Quinta da Pedra e Salamanga.	FM, FZ, POWO, TPL, WFO, APD, GBIF, LMA, LMU, Koning (1993)
Angiosperms	Eudicots	Apiaceae Lindl.	Apium	Species	Apium graveolens L.	Apium graveolens var. lusitanicum (Mill.) DC., Apium graveolens f. lusitanicum (Mill.) J.Helm, Apium graveolens subsp. rapaceum (Mill.) P.D.Sell, Apium integrilobum Hayata, Apium lobatum Gilib., Apium lusitanicum Mill., Apium maritimum Salisb., Apium palustre Thore, Apium rapaceum Mill., Apium vulgare Bubani, Carum graveolens (L.) Koso-Pol., Celeri graveolens (L.) Britton, Helosciadium graveolens…		Herb		Perennial										1				Introduced			MP: Marracuene (Ricatla).	FM, FZ, POWO, TPL, WFO, APD, GBIF, LMA, LMU
Angiosperms	Eudicots	Apiaceae Lindl.	Berula	Species	Berula imbricata (Schinz) Spalik & S.R.Downie	Afrocarum imbricatum (Schinz) Rauschert, Baumiella imbricata (Schinz) H.Wolff, Bunium imbricatum (Schinz) Drude, Carum imbricatum Schinz, Pimpinella imbricata (Schinz) Engl.		Herb		Perennial		1		1										Introduced			NI: Lichinga. T: Angónia.	FM, FZ, POWO, TPL, WFO, APD, GBIF, LMA, LMU
Angiosperms	Eudicots	Apiaceae Lindl.	Berula	Species	Berula repanda (Welw. ex Hiern) Spalik & S.R.Downie	Sium repandum Welw. ex Hiern		Herb		Perennial				1										Native			T: Angónia (Ulónguè, ao longo do rio Livirândeze; 40 km da Vila Mouzinho em direção a Zóbuè).	FM, FZ, POWO, TPL, WFO, APD, GBIF, LMA, LMU
Angiosperms	Eudicots	Apiaceae Lindl.	Centella	Species	Centella asiatica (L.) Urb.	Centella boninensis Nakai ex Tuyama, Centella coriacea Nannf., Centella hirtella Nannf., Centella tussilaginifolia (Baker) Domin, Centella ulugurensis (Engl.) Domin, Centella uniflora (Colenso) Nannf., Trisanthus cochinchinensis Lour., Chondrocarpus asiaticus Nutt., Chondrocarpus triflorus Nutt., Glyceria asiatica Nutt., Glyceria triflora Nutt., Hydrocotyle abbreviata A.Rich., Hydrocotyle abyssin…		Herb	Climber	Perennial					1	1	1	1		1		LC		Native			Z: Mocuba. S: Gorongosa (picada nº 11, Nhantaze), GNP (Várzea do Lago Urema, Cascatas de Morumbodzi). MC: Mavita (Vale do R. Messambuzi), Mts Chimanimani (Rio Mevumodzi a jusante do desfiladeiro), CNR (Nhahomba), Reserva Florestal de Moribane. G: 10 km a norte de Gumbe (no vale do rio Lumane), Bilene, Xai-Xai (margens do rio Limpopo). MP: Bobole (próx. duma lagoa), Cidade de Maputo, Namaacha, Mat…	FM, FZ, POWO, TPL, WFO, APD, GBIF, LMA, LMU, IUCN Red List, K, Wursten et al. (2017)
Angiosperms	Eudicots	Apiaceae Lindl.	Centella	Variety	Centella glabrata L. var. natalensis Adamson			Herb		Perennial						1											MC: Serra Mocuta.	APD, GBIF
Angiosperms	Eudicots	Apiaceae Lindl.	Centella	Species	Centella obtriangularis Cannon			Herb		Perennial						1					E	VU		Native			MC: Mts Chimanimani (Travessia do rio Tsungudzi; Mt. Nhamudimu,; Mt. Binga).	FM, FZ, POWO, TPL, WFO, APD, GBIF, LMA, LMU, Darbyshire et al. (2019), IUCN Red List, K, Wursten et al. (2017)
Angiosperms	Eudicots	Apiaceae Lindl.	Conium	Species	Conium maculatum L.	Cicuta major Garsault, Cicuta major Lam.,Cicuta officinalis Crantz,Conium ceretanum Sennen, Conium cicuta (Crantz) Neck., Conium croaticum Waldst. & Kit. ex Willd., Conium divaricatum Boiss. & Orph., Conium leiocarpum (Boiss.) Stapf, Conium maculatum var. barceloi O.Bolòs & Vigo, Conium maculatum subsp. croaticum (Waldst. & Kit. ex Willd.) Drude, Conium maculatum var. divaricatum (Boiss. & Orph.)…		Herb		Biennal		1						1						Introduced			NI: Lichinga (Estrada para Matama). G: Chibuto (Estação Experimental de Maniquenique).	FM, FZ, POWO, TPL, WFO, APD, GBIF, LMA, LMU
Angiosperms	Eudicots	Apiaceae Lindl.	Coriandrum	Species	Coriandrum sativum L.	Bifora loureiroi Kostel., Coriandropsis syriaca H.Wolff, Coriandrum globosum Salisb., Coriandrum majus Gouan, Coriandrum sativum var. afghanicum Stolet., Coriandrum sativum var. africanum Stolet., Coriandrum sativum var. anatolicum Stolet., Coriandrum sativum var. arabicum Stolet.,Coriandrum sativum subsp. asiaticum Stolet., Coriandrum sativum var. asiaticum Stolet., Coriandrum sativum subsp. ind…	Sium coriaudrum Vest	Herb		Annual								1		1				Introduced		Food	G: Chibuto, baixo Changane. MP: Cidade de Maputo.	FM, FZ, POWO, TPL, WFO, APD, GBIF, LMA, LMU
Angiosperms	Eudicots	Apiaceae Lindl.	Cyclospermum	Species	Cyclospermum leptophyllum (Pers.) Sprague ex Britton & P.Wilson	Aethusa leptophylla (Pers.) Spreng., Apium ammi var. leptophyllum (Pers.) Kuntze, Apium leptophyllum (Pers.) F.Muell., Helosciadium leptophyllum (Pers.) DC., Pimpinella leptophylla Pers., Ptychotis leptophylla (Pers.) Penz., Selinum leptophyllum (Pers.) E.H.L.Krause		Herb		Annual										1				Introduced			MP: Jardim Botânico Tunduru.	FM, FZ, POWO, TPL, WFO, APD, GBIF
Angiosperms	Eudicots	Apiaceae Lindl.	Daucus	Species	Daucus incognitus (C.Norman) Spalik, Reduron & Banasiak	Agrocharis incognita (C.Norman) Heywood & Jury, Caucalis incognita C.Norman, Torilis eminii Engl., Torilis gracilis Engl.		Herb		Annual						1								Native			MC: Floresta da Penha Longa (acima da cachoeira), Estrada até Tsetsera (cerca de 3/4 da subida).	FM, FZ, POWO, TPL, WFO, APD, GBIF, LMA, LMU, BNRH
Angiosperms	Eudicots	Apiaceae Lindl.	Daucus	Species	Daucus pedunculatus (Baker f.) Banasiak, Spalik & Reduron	Agrocharis pedunculata (Bak.fil.) V.H.Heywood & S.L.Jury, Caucaliopsis stolzii H.Wolff, Caucalis longisepala Engl., Caucalis pedunculata Baker f., Gynophyge tansaniensis Gilli	Caucalis stolzii (H.Wolff) M.Hiroe	Herb		Perennial		1		1	1									Native			NI: Lichinga. T: Angónia (na Vila Mouzinho). Z: Entre Milange e Alto Chindio.	FM, FZ, POWO, TPL, WFO, APD, GBIF, LMA, LMU
Angiosperms	Eudicots	Apiaceae Lindl.	Diplolophium	Species	Diplolophium buchananii (Benth. ex Oliv.) C.Norman	Physotrichia buchananii Benth. ex Oliv.		Herb		Perennial			1		1	1	1					LC		Native			NP: Ribáuè (Serra Mepáluè). Z: Serra Gúruè (próximo da plantação da sociedade "Chá Moçambique, Lda"). S: Serra Gorongosa (Mt. Gogógo). MC: Serra Zuira, Planalto Tsetsera, Mts Chimanimani (Mt. Shangani; Mt. Binga; Vale do R. Mutandani; Ao longo da trilha de Zomba entre Bakaromambo e o alcance médio do R. Mevumodzi).	FM, FZ, POWO, TPL, WFO, APD, GBIF, LMA, IUCN Red List, K
Angiosperms	Eudicots	Apiaceae Lindl.	Diplolophium	Species	Diplolophium swynnertonii (Baker f.) C.Norman	Diplolophium buchananii subsp. swynnertonii (Baker f.), Physotrichia gorungosensis Engl., Physotrichia swynnertonii Baker f.		Herb		Perennial						1	1							Native			S: Serra Gorongosa (Mt. Gogógo). MC: CNR (Sela abaixo da encosta do Mt. Shangani, Mandzundzu), Mts Chimanimani (Pequeno vale a nordeste do Mt. Binga; Ao longo da trilha de Zomba entre Bakaromambo e o alcance médio do R. Mevumodzi).	FM, FZ, POWO, TPL, WFO, APD, GBIF, LMA, LMU, K
Angiosperms	Eudicots	Apiaceae Lindl.	Diplolophium	Species	Diplolophium zambesianum Hiern	Physotrichia arenaria Engl. & Gilg, Physotrichia helenae Buscal. & Muschl.		Herb		Perennial				1										Native			T: Mucanga (entre Furancungo e Mualadze).	FM, FZ, POWO, TPL, Müller et al. (2012), WFO, APD, GBIF, LMA
Angiosperms	Eudicots	Apiaceae Lindl.	Foeniculum	Species	Foeniculum vulgare Mill.	Anethum dulce DC., Anethum foeniculum L., Anethum minus Gouan, Anethum panmori Roxb., Anethum panmorium Roxb. ex Fleming, Anethum pannorium Roxb., Anethum rupestre Salisb., Foeniculum azoricum Mill., Foeniculum divaricatum Griseb., Foeniculum dulce Mill., Foeniculum giganteum Lojac., Foeniculum officinale All., Foeniculum panmorium (Roxb.) DC., Foeniculum piperitum C.Presl, Foeniculum rigidum Bro…	Meum piperitum Schult., Seseli dulce Koso-Pol., Seseli piperitum Koso-Pol., Tenoria romana Schkuhr ex Spreng., Ozodia foeniculacea Wight & Arn.	Herb		Perennial								1						Introduced		Food, Medicine	G: Chibuto (4 km de Maniquenique).	FM, FZ, POWO, TPL, WFO, APD, GBIF, LMA, LMU
Angiosperms	Eudicots	Apiaceae Lindl.	Heteromorpha	Variety	Heteromorpha arborescens (Spreng.) Cham. & Schltdl. var. abyssinica (Hochst. ex A. Rich.) H.Wolff	Heteromorpha trifoliata (H.L. Wendl.) Eckl. & Zeyh.		Tree				1	1	1	1	1	1	1	1	1				Native	Cundabui (T,sho); Idda-Mbuzi (T); Idja-Mbuzi (T); Nampyirépyire (NP)		NI: Marrupa à Lichinga, Entre Massangulo e Lichinga. NP: Nampula, Mt. Riane, Serra Chinga, 37 km à E. de Malema. T: Tete, Metengo-wa-Mbalame (próximo da Fonte Boa), Mt. Zóbuè, Songo, Serra Pandarajala, Angónia (Margem do rio Mauè; Chimbiya). Z: Serra Gúruè (Ponte sobre o R. Muqueche para o Mt. Namuli; Cascatas), Mt. Ile, Campo à Raposo, Serra Morrumbala, Entre Mocuba e Namarroi. S: Concessão Cata…	Müller et al. (2012), FM, TPL, WFO, APD, GBIF, LMA, LMU, Koning (1993), BNRH, Burrows et al. (2018), Wursten et al. (2017)
Angiosperms	Eudicots	Apiaceae Lindl.	Heteromorpha	Variety	Heteromorpha arborescens (Spreng.) Cham. & Schltdl. var. frutescens P.J.D.Winter	Heteromorpha transvaalensis auct. non Schltr. & H.Wolff		Tree									1							Native			S: GNP (10 km a norte-noroeste de Condué e 34 km sudoeste de Inhaminga).	FZ, POWO, TPL, WFO, APD, GBIF, LMA, LMU, BNRH
Angiosperms	Eudicots	Apiaceae Lindl.	Heteromorpha	Species	Heteromorpha involucrata Conrath	Heteromorpha glauca H. Wolff, Heteromorpha glauca Lemesle, Heteromorpha kassneri H. Wolff, Heteromorpha stolzii H. Wolff		Shrub				1					1					LC	Requiring to add Mozambique in the geographic range	Native			NI: Niassa. S: Sofala.	FM, FZ, POWO, IUCN Red List, TPL, WFO, APD, JSTOR, GBIF, LMA, LMU, Burrows et al. (2018)
Angiosperms	Eudicots	Apiaceae Lindl.	Heteromorpha	Species	Heteromorpha montana (P.J.D.Winter) J.E.Burrows	Heteromorpha arborescens var. montana P.J.D.Winter		Tree							1	1								Native			Z: Mt. Namuli, Serra Chiperone. MC: Mts Chimanimani (planalto entre o Mt. Nhamudimu e o Mt. Binga; Encosta Nordeste do Mt. Pheza).	FZ, POWO, TPL, WFO, APD, GBIF, LMA, LMU, BNRH, Burrows et al. (2018), K, Wursten et al. (2017)
Angiosperms	Eudicots	Apiaceae Lindl.	Heteromorpha	Variety	Heteromorpha stenophylla Welw. ex Schinz var. stenophylla			Shrub				1				1								Native			NI: Entre Massangulo e Lichinga. MC: Estrada para Tsetsera, Mts Chimanimani (caminho de Vila Nhabawa à Chikukwa, Desfiladeiro de Musapa).	POWO, APD, BNRH
Angiosperms	Eudicots	Apiaceae Lindl.	Heteromorpha	Variety	Heteromorpha stenophylla Welw. ex Schinz var. transvaalensis (Schltr. & H.Wolff) P.J.D.Winter	Heteromorpha transvaalensis Schltr. & H.Wolff		Shrub				1				1								Native			NI: Between Massangulo and Lichinga. MC: Mts Chimanimani, Tsetsera.	FM, POWO, TPL, APD, Burrows et al. (2018), BNRH
Angiosperms	Eudicots	Apiaceae Lindl.	Lefebvrea	Species	Lefebvrea abyssinica A.Rich.	Lefebvrea stuhlmannii Engl., Peucedanum lefeburia Drude, Peucedanum stuhlmannii (Engl.) Drude.		Herb		Perennial		1		1	1									Native			NI: Lichinga. T: Angónia (Posto Zootécnico), Serra Pandarajala, Furancungo à Gandáli (Celula M'palampa). Z: Mt. Namuli.	FM, FZ, POWO, TPL, WFO, APD, GBIF, LMA, LMU
Angiosperms	Eudicots	Apiaceae Lindl.	Lefebvrea	Species	Lefebvrea grantii (Kingston ex Oliver) S.Droop	Lefebvrea angolensis Welw. ex Ficalho, Lefebvrea benguelensis Welw. ex Engl., Lefebvrea dinteri (H.Wolff) Mattf., Lefebvrea lancifoliola Mattf., Lefebvrea microcarpa H.Wolff, Lefebvrea nigeriae H.Wolff, Peucedanum angolense (Welw. ex Ficalho) Cannon, Peucedanum benguellense (Welw. ex Engl.) Eyles, Peucedanum buchananii Baker, Peucedanum cameroonsum M.Hiroe, Peucedanum dinteri H.Wolff, Peucedanum …		Herb		Perennial			1			1								Native			NP: Mt. Namuli (Planalto Muretha). MC: Mavita, Rotanda.	Timberlake et al. (2009), FM, FZ, POWO, TPL, WFO, APD, GBIF, LMA, LMU
Angiosperms	Eudicots	Apiaceae Lindl.	Lefebvrea	Species	Lefebvrea longipedicellata Engl.	Lefebvrea brevipes H. Wolff, Lefebvrea longipedicellata var. holstii Engl., Lefebvrea longipedicellata var. levisticifolia H. Wolff, Lefebvrea naegeleana H. Wolff, Peucedanum longipedicellatum (Engl.) Drude, Peucedanum naegeleanum (H. Wolff) M. Hiroe		Herb		Perennial		1		1	1									Native			NI: Maniamba. T: Zóbuè, Serra Domué. Z: Serra Gúruè, Mt. Namuli, Serra Morrumbala.	FM, FZ, POWO, TPL, WFO, APD, GBIF, LMA, LMU
Angiosperms	Eudicots	Apiaceae Lindl.	Pimpinella	Species	Pimpinella buchananii H.Wolff			Herb		Perennial		1		1	1									Native			NI: Lichinga, Vale de Macalonge (próx. de Chiponde). T: Domué (entre os rios Nadziboli e Macame). Z: Gúruè (22 km de Nintulo, próx. de Lioma).	FM, FZ, POWO, TPL, WFO, APD, GBIF, LMA, LMU
Angiosperms	Eudicots	Apiaceae Lindl.	Pimpinella	Species	Pimpinella caffra (Eckl. & Zeyh.) D.Dietr.	Anisum stadense Eckl. & Zeyh., Cnidium kraussianum Sond., Foeniculum kraussianum Meisn., Pimpinella cordata E.Mey., Pimpinella hydrophila H.Wolff, Pimpinella kraussiana Meisn. ex C.Krauss, Pimpinella krookii H.Wolff, Pimpinella nyasica C.Norman, Pimpinella reenensis Rech., Pimpinella schlechteri H.Wolff, Pimpinella stadensis (Eckl. & Zeyh.) D.Dietr., Pimpinella transvaalensis H.Wolff, Selinum kra…	Anisum caffrum Eckl. & Zeyh.	Herb		Perennial						1	1							Native			S: Serra Gorongosa (Mt. Nhandore). MC: Tsetsera.	FM, FZ, POWO, TPL, WFO, APD, GBIF, LMA, LMU
Angiosperms	Eudicots	Apiaceae Lindl.	Pimpinella	Species	Pimpinella huillensis Welw. ex Engl.	Pimpinella gossweileri H.Wolff, Pimpinella mechowii (Engl.) H.Wolff, Pimpinella platyphylla Welw. ex Hiern, Pimpinella robusta C.Norman, Pimpinella welwitschii Engl.		Herb		Perennial		1		1										Native			NI: Lichinga. T: Angónia (zona norte da Serra Domuè).	FM, FZ, POWO, TPL, WFO, APD, GBIF, LMA, LMU
Angiosperms	Eudicots	Apiaceae Lindl.	Pimpinella	Species	Pimpinella kassneri (H. Wolff) Cannon	Physotrichia kassneri H. Wolff		Herb		Perennial		1												Native			NI: Massangulo.	FM, FZ, POWO, TPL, WFO, APD, GBIF, LMA, LMU
Angiosperms	Eudicots	Apiaceae Lindl.	Pimpinella	Species	Pimpinella ledermannii H.Wolff	Pimpinella africana M.Hiroe, Pimpinella engleriana H.Wolff, Pimpinella ledermannii subsp. engleriana (H.Wolff) C.C.Towns., Pimpinella tessmannii H.Wolff, Pimpinella tomentosa Engl.		Herb		Perennial		1												Native			NI: Lichinga.	FM, FZ, POWO, TPL, WFO, APD, GBIF, LMA, LMU
Angiosperms	Eudicots	Apiaceae Lindl.	Pimpinella	Species	Pimpinella mulanjensis C.C.Towns.			Herb		Perennial					1						NE	LC		Native			Z: Mt. Namuli.	Timberlake et al. (2009), FM, FZ, POWO, TPL, WFO, APD, GBIF, LMA, LMU, Darbyshire et al. (2019), IUCN Red List, K
Angiosperms	Eudicots	Apiaceae Lindl.	Sanicula	Species	Sanicula elata Buch.-Ham. ex D.Don	Sanicula capensis (Cham. & Schltdl.) Eckl. & Zeyh., Sanicula europaea var. capensis Cham. & Schltdl., Sanicula europaea var. elata (Buch.-Ham. ex D. Don) H. Boissieu, Sanicula europaea subsp. elata (Buch.-Ham. ex D. Don) Hultén, Sanicula hermaphrodita Buch.-Ham. ex D. Don, Sanicula montana Reinw. ex Blume, Sanicula natalensis Gand.		Herb		Perennial						1	1							Native			S: Serra Gorongosa (Cascatas de Morumbodzi).MC: Quinta da Fronteira, Mossurize (próximo de Espungabera), Serra Zuira, Planlto Tsetsera.	FM, FZ, POWO, TPL, WFO, APD, GBIF, LMA, LMU
Angiosperms	Eudicots	Apiaceae Lindl.	Steganotaenia	Species	Steganotaenia araliacea Hochst.	Peucedanum araliaceum (Hochst.) Benth. & Hook.f. ex Vatke		Shrub			1	1		1	1	1	1					LC		Native	Mudunhanga (MC); M'Polowoni (T); Psukula (T)	Medicine	CD: Norte de Mueda na estrada para Mocímboa da Rovuma - Ngapa. NI: R. Mepoche, Macalonge, REN (Metapiri, ao longo do R. Lugenda), N'tendele Lodge (margem do Lago Niassa, a sul de Meponda). T: Furancungo, Mt. Zóbuè, Ulónguè, 19 km à sul de Tete. Z: Ilha de Inhagoma, Namagoa, Serra Chiperone. S: Entre Quicuaxa e Machimeja, GNP (Ao longo da estrada da EN1 até ao portão de entrada do Parque; Ao longo…	Müller et al. (2012), Timberlake et al. (2009), FZ, POWO, TPL, WFO, APD, GBIF, LMA, LMU, IUCN Red List, Koning (1993), Manuel et al. (2020), Bruschi et al. (2011), BNRH, Burrows et al. (2018)
Angiosperms	Eudicots	Apiaceae Lindl.	Torilis	Species	Torilis arvensis (Huds.) Link	Anthriscus arvensis (Huds.) Koso-Pol., Caucalis angustifolia Forssk., Caucalis arvensis Huds., Caucalis aspersa Savi, Caucalis chrysocarpa (Boiss. & Blanche) Bornm., Caucalis divaricata F.Heller, Caucalis fallax Boiss. & Balansa ex Boiss., Caucalis helvetica Jacq., Caucalis infesta (L.) Curtis, Caucalis infesta var. elatior Gaudin, Caucalis segetalis Steud., Caucalis segetum Thuill., Daucus infes…	Lappularia infesta Pomel, Lappularia neglecta Pomel, Ozotrix helvetica (Jacq.) Raf., Tordylium segetum Schult., Torilis chlorocarpa Spreng., Torilis chrysocarpa Boiss. & Blanche, Torilis divaricata Moench,, Torilis friedrichsthalii Ces., Torilis syriaca Boiss. & Blanche	Herb		Annual		1			1									Introduced			NI: Lichinga, Serra Jéci. Z: Serra Gúruè.	FM, FZ, POWO, TPL, WFO, APD, GBIF, JSTOR
Angiosperms	Eudicots	Apocynaceae Juss.	Acokanthera	Species	Acokanthera laevigata Kupicha			Tree							1									Native			Z: Mt. Mabu.	Burrows et al. (2018), POWO, APD, FM, TPL
Angiosperms	Eudicots	Apocynaceae Juss.	Acokanthera	Species	Acokanthera oblongifolia (Hochst.) Benth. & Hook.fil. ex B.D.Jacks.	Acokanthera oblongifolia (Hochst.) Codd, Acokanthera spectabilis (Sond.) Hook.f, Acokanthera venenata var. spectabilis (Sond.) Sim, Carissa oblongifolia Hochst, Carissa spectabilis (Sond.) Pichon Jasminonerium oblongifolium (Hochst.) Kuntze, Toxicophlaea spectabilis Sond		Shrub										1	1	1		LC		Native	Chatissa-Ija (MP,rong)		I: Praia de Závora. G: Chidenguele. MP: Ponta Mamoli, Ponta Malongane, Polana, I. Inhaca, Ponta do Ouro, Costa do Sol.	FM, FZ, POWO, IUCN Red List, TPL, WFO, APD, JSTOR, GBIF, LMA, LMU, Koning (1993), BNRH, Burrows et al. (2018)
Angiosperms	Eudicots	Apocynaceae Juss.	Acokanthera	Species	Acokanthera oppositifolia (Lam.) Codd	Acokanthera lamarckii G.Don [Illegitimate], Acokanthera longiflora Stapf, Acokanthera rhodesica Merxm, Acokanthera venenata (Burm.f.) G.Don, Carissa acokanthera Pichon [Illegitimate], Carissa longiflora (Stapf) G.H.M.Lawr, Carissa oppositifolia (Lam.) Pichon, Cestrum oppositifolium Lam, Cestrum venenatum Burm.f. [Illegitimate], Garcinia sciura Spirlet, Pleiocarpa hockii De Wild, Toxicophlaea cest…		Shrub						1				1		1		LC		Native			T: Ulónguè. G: Manjacaze à Chidenguele. MP: Costa do Sol, Mazeminhama, Mt. Inhaca, Changalane, Catuane à Salamanga (margem do Rio Maputo).	FZ, POWO, TPL, WFO, APD, GBIF, LMA, LMU, IUCN Red List, BNRH, Burrows et al. (2018)
Angiosperms	Eudicots	Apocynaceae Juss.	Adenium	Species	Adenium multiflorum Klotzsch	Adenium obesum var. multiflorum (Klotzsch) Codd		Shrub						1	1		1	1	1	1				Native	Chimua (G,rong); Chimungumudzua (MC).	Beliefs, Medicine	T: Entre Zóbuè e Tete, Cahora Bassa. S: GNP, Chitengo, Entre rios Pungué e Búzi. Z: Mopeia, Chire. I: Vilanculos (entre Funhalouro e Saúte). G: LNP, Massingir, Caniçado, Lagoa Nova à Mapulanguene. MP: Umbelúzi, Boane, Matola-Rio, Changalane, Matutuíne, Mts Libombos.	FZ, POWO, TPL, WFO, APD, GBIF, LMA, LMU, Koning (1993), Burrows et al. (2018)
Angiosperms	Eudicots	Apocynaceae Juss.	Adenium	Species	Adenium obesum Roem. & Schult.	Adenium arabicum Balf.f., Adenium arboreum Ehrenb, Adenium coetaneum Stapf, Adenium honghel Lindl., Adenium micranthum Stapf, Adenium obesum subsp. socotranum (Vierh.) Lavranos, Adenium obesum subsp. somalense (Balf.f.) G.D.Rowley, Adenium socotranum Vierh., Adenium somalense Balf.f., Adenium somalense var. caudatipetalum Chiov., Adenium somalense var. crispum Chiov., Adenium speciosum Fenzl, Ade…		Shrub											1	1		LC	Requiring to add Mozambique in the geographic range	Native			I: Govuro. MP: Boane à Porto Henriques.	FM, FZ, POWO, IUCN Red List, TPL, WFO, APD, JSTOR, GBIF, LMA, LMU
Angiosperms	Eudicots	Apocynaceae Juss.	Adenium	Species	Adenium oleifolium Stapf	Adenium lugardiae N.E.Br., Adenium obesum subsp. oleifolium (Stapf) G.D.Rowley, Adenium oleifolium var. angustifolium Phil., Adenium somalense var. angustifolium (Phil.) G.D.Rowley		Shrub	Succulent											1							MP: Mapulanguene à Maele.	POWO, TPL, WFO, APD, GBIF
Angiosperms	Eudicots	Apocynaceae Juss.	Adenium	Species	Adenium swazicum Stapf	Adenium boehmianum var. swazicum (Stapf) G.D.Rowley, Adenium obesum subsp. swazicum (Stapf) G.D.Rowley		Shrub	Succulent									1		1				Native			G: Massingir à Caniçado. MP: Boane, Magude à Chobela, Moamba à Ressano Garcia, Umbelúzi.	FM, FZ, POWO, TPL, WFO, APD, GBIF, LMA, BNRH, Burrows et al. (2018), K
Angiosperms	Eudicots	Apocynaceae Juss.	Alafia	Species	Alafia caudata Stapf	Alafia butayei Stapf, Alafia caudata subsp. latiloba Kupicha, Alafia conica Pichon, Alafia jarmentosa Stapf, Alafia sarmentosa Stapf		Liana							1		1							Native			Z: Maganja da Costa (Floresta Gobene). S: Serra Gorongosa, Chupanga, Dondo, GNP, Marromeu (Floresta Inhamitanga).	FM, FZ, POWO, TPL, WFO, APD, GBIF, LMA, LMU, BNRH
Angiosperms	Eudicots	Apocynaceae Juss.	Alafia	Species	Alafia microstylis K.Schum.	Alafia clusioides S.Moore, Alafia swynnertonii S.Moore		Shrub								1	1							Native			S: Serra Gorongosa (Mt. Bunga), Canganetole, GNP (planícies do Lago Urema), Floresta Nharucato. MC: Floresta Amatongas.	FZ, POWO, TPL, WFO, APD, GBIF, LMA, LMU, BNRH, Burrows et al. (2018)
Angiosperms	Eudicots	Apocynaceae Juss.	Alafia	Species	Alafia orientalis K.Schum. ex De Wild.	Alafia congolana Pichon, Alafia ugandensis Pichon		Liana							1	1								Native			Z: Serra Morrumbala. MC: Floresta de Rinorea (ao norte de Dombe na estrada de Sussendenga).	Müller et al. (2012), FM, FZ, POWO, TPL, WFO, APD, GBIF, BNRH
Angiosperms	Eudicots	Apocynaceae Juss.	Allamanda	Species	Allamanda blanchetii A.DC.	Allamanda violacea Gardner		Subshrub					1											Introduced			NP: Ribáuè.	POWO, Da Silva et al. (2004), TPL, APD, GBIF
Angiosperms	Eudicots	Apocynaceae Juss.	Ancylobothrys	Species	Ancylobothrys petersiana Pierre	Ancylobothrys rotundifolia (Dewèvre) Pierre, Landolphia angustifolia K.Schum. ex Engl., Landolphia monteiroi N.E.Br., Landolphia petersiana (Klotzsch) Dyer, Landolphia petersiana var. rotundifolia Dewèvre, Landolphia petersiana var. rufa Stapf, Landolphia petersiana var. tubeufii Busse ex Stapf, Landolphia scandens var. angustifolia (K.Schum. ex Engl.) Hallier f., Landolphia scandens var. petersi…		Shrub			1	1	1	1	1	1	1	1	1	1				Native	Gulunje (I); Kurua (NP,macu); Mabunze (T); Matamungo (MP); Mino (I); M'Pira (NP,macu); Mututu (S); Ndâca (G,rong); Râwa (NP,macu); Tamuela (MP,rong); Tamunga (MP,rong); Tengwela (MP,rong); Tewela (MP,rong)	Food	CD: Pemba, Nangade, Quiterajo (Floresta Banana), Mucojo. NI: Marrupa. NP: Crusse, Monapo, Mossuril, Angoche. T: Cahora Bassa. Z: Zalala à Quelimane, Norte de Quelimane, Chinde. S: Chinizíua, Entre Dondo e R. Púnguè, Praia de Beira, Inhaminga, Grudja, Norte da Praia de Macúti. MC: CNR (Mt. Binga ao R. Nhamadzi), Mt. Zembe à Gondola. I: Nhachengue, I. Bazaruto (Morro do Farol), Zavala, Maxixe, Pome…	FZ, POWO, TPL, WFO, APD, GBIF, LMA, LMU, Koning (1993), Bruschi et al. (2014), Santo-António and Goulão (2015), BNRH, Burrows et al. (2018), K
Angiosperms	Eudicots	Apocynaceae Juss.	Ancylobothrys	Species	Ancylobothrys tayloris (Stapf) Pichon	Landolphia pachyphylla Stapf, Landolphia tayloris Stapf		Liana			1											LC		Native			CD: Planalto de Mueda, Mocímboa da Rovuma à Ngapa, Quiterajo (Namparamela).	FM, FZ, POWO, IUCN Red List, TPL, WFO, APD, JSTOR, GBIF, LMA, LMU, BNRH, K
Angiosperms	Eudicots	Apocynaceae Juss.	Asclepias	Subspecies	Asclepias cucullata (Schltr.) Schltr. subsp. scabrifolia (S.Moore) Goyder	Asclepias cucullata var. scabrifolia (S. Moore) Goyder, Asclepias scabrifolia S.Moore		Herb	Geophyte							1					NE			Native			MC: Mts Chimanimani (Mt. Shangani), CNR (Monte Binga acima da travessia do rio Nhamadzi), Serra Zuira, Mt. Xiroso, Garuso, Macequece.	FM, FZ, POWO, TPL, WFO, APD, GBIF, LMA, LMU, Darbyshire et al. (2019), K, Wursten et al. (2017)
Angiosperms	Eudicots	Apocynaceae Juss.	Asclepias	Species	Asclepias fimbriata Weim.	Trachycalymma fimbriatum (Weim.) Bullock		Herb		Perennial						1	1					LC		Native			S: Serra Gorongosa (Mt. Nhandore). MC: Serra Zuira, Tsetsera.	FM, FZ, POWO, TPL, WFO, APD, GBIF, LMA, LMU, IUCN Red List, Wursten et al. (2017)
Angiosperms	Eudicots	Apocynaceae Juss.	Asclepias	Species	Asclepias fulva N.E.Br.	Asclepias calceolus S.Moore, Asclepias deregeana var. calceolus (S.Moore) N.E.Br., Asclepias deregeana var. sordida N.E.Br., Asclepias dregeana Schltr., Asclepias rubicunda Schltr., Asclepias viridiflora (E.Mey.) Goyder [Illegitimate], Gomphocarpus viridiflorus (E.Mey.) Decne. [Illegitimate], Pachycarpus fulvus (N.E.Br.) Bullock, Pachycarpus viridiflorus E.Mey., Xysmalobium viridiflorum (E.Mey.) …		Herb		Perennial						1								Native			MC: Macequece.	FM, FZ, POWO, TPL, WFO, APD, GBIF, LMA, LMU
Angiosperms	Eudicots	Apocynaceae Juss.	Asclepias	Species	Asclepias graminifolia (Wild) Goyder	Pachycarpus graminifolius Wild, Trachycalymma graminifolium (Wild) Goyder		Herb	Geophyte							1					NE	LC		Native			MC: Mts Chimanimani (Mt. Nhamedimu ou Nhamudima).	FM, FZ, POWO, TPL, WFO, APD, GBIF, LMA, LMU, Darbyshire et al. (2019), IUCN Red List, K, Wursten et al. (2017)
Angiosperms	Eudicots	Apocynaceae Juss.	Asclepias	Species	Asclepias longissima N.E.Br.	Gomphocarpus longissimus K.Schum.		Herb		Perennial														Native			Norte de Moçambique.	FM, FZ, POWO, TPL, WFO, APD, GBIF, LMA, LMU
Angiosperms	Eudicots	Apocynaceae Juss.	Asclepias	Species	Asclepias palustris (K.Schum.) Schltr.	Asclepias cristata S.Moore, Gomphocarpus cristatus Decne., Gomphocarpus palustris K.Schum., Trachycalymma cristatum (Decne.) Bullock		Herb		Perennial					1									Native			Z: Mt. Namuli, Serra Tumbine.	FM, FZ, POWO, TPL, WFO, APD, GBIF, LMA, LMU, Wursten et al. (2017)
Angiosperms	Eudicots	Apocynaceae Juss.	Aspidoglossum	Species	Aspidoglossum araneiferum (Schltr.) Kupicha	Schizoglossum araneiferum Schltr.		Herb		Perennial										1				Native			MP: Entre Changalane e Catuane (Herdade Lubimba Sul), Ressano Garcia.	FM, FZ, POWO, TPL, WFO, APD, GBIF, LMA, LMU
Angiosperms	Eudicots	Apocynaceae Juss.	Aspidoglossum	Species	Aspidoglossum biflorum E.Mey.	Schizoglossum biflorum (E.Mey.) Schltr., Schizoglossum conrathii Schltr., Schizoglossum excisum Bolus, Schizoglossum gwelense N.E.Br., Schizoglossum shirense N.E.Br., Schizoglossum strictum Schltr., Schizoglossum tubulosum Schltr., Schizoglossum venustum Schltr.		Herb		Perennial					1									Native			Z: Namagoa.	FM, FZ, POWO, TPL, WFO, APD, GBIF, LMA, LMU, K
Angiosperms	Eudicots	Apocynaceae Juss.	Aspidoglossum	Species	Aspidoglossum delagoense (Schltr.) Kupicha	Schizoglossum biauriculatum Schltr., Schizoglossum delagoense Schltr		Herb		Perennial										1				Native			MP: I. Inhaca, Baía de Maputo, Entre Ponta Malongane e Zitundo.	FM, FZ, POWO, TPL, WFO, APD, GBIF, LMA, LMU
Angiosperms	Eudicots	Apocynaceae Juss.	Aspidoglossum	Species	Aspidoglossum glabellum Kupicha			Herb	Geophyte							1					NE	EN		Native			MC: Mts Chimanimani(Vale do R. Mevumodzi)	FM, FZ, POWO, TPL, WFO, APD, GBIF, LMA, LMU, Darbyshire et al. (2019), IUCN Red List, K, Wursten et al. (2017)
Angiosperms	Eudicots	Apocynaceae Juss.	Aspidoglossum	Species	Aspidoglossum hirundo Kupicha			Herb	Geophyte				1		1						NE			Native			NP: Ribáuè à Alto Molócuè. Z: Pebane, Maganja da Costa à Mocubela, Moebede.	FM, FZ, POWO, TPL, WFO, APD, GBIF, LMA, LMU, Darbyshire et al. (2019), K
Angiosperms	Eudicots	Apocynaceae Juss.	Aspidoglossum	Species	Aspidoglossum interruptum (E.Mey.) Bullock	Gomphocarpus interruptus (E.Mey.) D.Dietr., Lagarinthus interruptus E. Mey., Schizoglossum altissimum Schltr., Schizoglossum barberiae Schltr. , Schizoglossum interruptum (E. Mey.) Schltr., Schizoglossum lasiopetalum Schltr.		Herb		Perennial						1			1	1				Native			MC: Chimoio, Garuso. I: Morrumbene. MP: Matola.	FM, FZ, POWO, TPL, WFO, APD, GBIF, LMA, LMU
Angiosperms	Eudicots	Apocynaceae Juss.	Aspidoglossum	Species	Aspidoglossum nyasae (Britten & Rendle) Kupicha	Schizoglossum leptoglossum Weim., Schizoglossum multifolium N.E. Br., Schizoglossum nyasae Britten & Rendle		Herb		Perennial					1									Native			Z: Serra Morrumbala.	FM, FZ, POWO, TPL, WFO, APD, GBIF, LMA, LMU, Wursten et al. (2017)
Angiosperms	Eudicots	Apocynaceae Juss.	Australluma	Species	Australluma ubomboensis (I.Verd.) Bruyns	Pachycymbium ubomboense (Verd.) M.G. Gilbert	Angolluma ubomboensis (Verd.) Plowes, Caralluma ubomboensis Verd.	Herb	Succulent	Perennial							1							Native			S: Machanga (The Buffalo Camp).	FM, FZ, POWO, TPL, WFO, APD, GBIF, LMA, LMU
Angiosperms	Eudicots	Apocynaceae Juss.	Baissea	Species	Baissea myrtifolia (Benth.) Pichon	Baissea kidengensis (K.Schum.) Pichon, Baissea melanocephala (K.Schum.) Pichon, Baissea subsessilis (Benth.) Stapf ex Hutch. & Dalziel, Baissea urceolata (Stapf) Pichon, Oncinotis melanocephala K.Schum., Zygodia kidengensis K.Schum., Zygodia melanocephala (K.Schum.) Stapf, Zygodia myrtifolia Benth., Zygodia subsessilis Benth., Zygodia urceolata Stapf		Shrub			1													Native			CD: Entre Pundanhar e Nangade, Vale do R. Rovuma.	FZ, POWO, TPL, WFO, APD, GBIF, LMA, LMU, BNRH, Burrows et al. (2018), K
Angiosperms	Eudicots	Apocynaceae Juss.	Calotropis	Species	Calotropis gigantea (L.) Dryand.	Asclepias gigantea L, Calotropis gigantea (L.) R. Br. ex Schult., Madorius giganteus (L.) Kuntze, Periploca cochinchinensis Lour., Streptocaulon cochinchinense (Lour.) G. Don		Tree			1						1							Introduced			CD: Praia de Wimbe, Macomia, Mecúfi. S: Maringué.	FM, FZ, POWO, TPL, WFO, APD, GBIF, LMA, LMU, Burrows et al. (2018), K
Angiosperms	Eudicots	Apocynaceae Juss.	Calotropis	Species	Calotropis procera (Aiton) W.T.Aiton	Apocynum syriacum Garsault, Apocynum syriacum S.G.Gmel., Asclepias gigantea Willd., Asclepias patula Decne., Asclepias procera Aiton, Calotropis gigantea var. procera (Aiton) P.T.Li, Calotropis hamiltonii Wight, Calotropis inflexa Chiov., Calotropis persica Gand., Calotropis procera subsp. hamiltonii (Wight) Ali, Calotropis syriaca (S.G.Gmel.) Woodson, Calotropis wallichii Wight, Madorius proceru…		Shrub				1		1			1		1					Native			NI: Metangula à Nova Coimbra. T: Cahora Bassa. S: Chemba à Tambara. I: Inhambane.	FZ, POWO, TPL, WFO, APD, GBIF, LMA, LMU, Burrows et al. (2018)
Angiosperms	Eudicots	Apocynaceae Juss.	Carissa	Species	Carissa bispinosa (L.) Desf. ex Brenan	Arduina acuminata E.Mey., Arduina bispinosa L., Arduina erythrocarpa Eckl., Arduina megaphylla Gand., Carandas arduina S.Moore, Carissa acuminata (E.Mey.) A.DC., Carissa arduina Lam., Carissa bispinosa subsp. zambesiensis Kupicha, Carissa cordata Fourc., Carissa cordata Dinter, Carissa dinteri Markgr., Carissa erythrocarpa (Eckl.) A.DC., Carissa myrtoides Desf., Carissa sessiliflora Brongn. ex Pi…	Lycium cordatum Mill.	Shrub					1		1	1	1	1	1	1		LC		Native	Chamigua (NI,macu); Kekani (MP,rong); Muchavanze (MC,sho); Nulo (I,copi); Nulo (MP,tson); Tondolofane (MP,rong)	Beliefs, Medicine	NP: Serra Chinga, Serra Ribáuè. Z: Gúruè (próx. R. Malema), Mt. Mabu, Mt. Namuli, Serra Chiperone. S: Serra Gorongosa (Mt. Nhandore, Mt. Gogógo), Satundjira. MC: Garuso, Mt. Vengo, Serra Choa, Serra Espungabera, Rotanda (Mt. Xiroso), Mt. Mocuta, Mt. Magorogodo (Zomba), Mt. Tsetsera, Mts Chimanimani (Chikukwa; Floresta Makurupine), CNR (ao longo do caminho para o Mt. Binga acima do Rio Nhamadzi). …	FM, FZ, POWO, Müller et al. (2012), Timberlake et al. (2007), Timberlake et al. (2009), IUCN Red List, TPL, WFO, APD, JSTOR, GBIF, LMA, LMU, Koning (1993), Conde et al. (2014), BNRH, Burrows et al. (2018), K
Angiosperms	Eudicots	Apocynaceae Juss.	Carissa	Species	Carissa macrocarpa (Eckl.) A. DC.	Arduina grandiflora E.Mey., Arduina macrocarpa Eckl., Carissa africana A.DC., Carissa grandiflora (E.Mey.) A.DC., Carissa praetermissa Kupicha, Jasminonerium africanum (A.DC.) Kuntze, Jasminonerium macrocarpum (Eckl.) Kuntze		Shrub			1		1		1		1		1	1		LC		Native	Amatungulu (MP,rong); Chivelawyelane (I,tswa); Nhamalimphanda (sena)		CD: Pebane (próx. ao Farol). NP: Angoche, Mossuril, Serra Mesa. Z: Bajone, Murroa à Namuera, Casa Branca, Entre Caia e Nicoadala. S: Levasflor, + - 400 m à sul-sudeste da Serrarção na margem Norte do rio Chinizíua (Quessemaza). I: Banamana à Machaíla, I. Bazaruto, Temane (Inhassoro). MP: I. Inhaca, Bela Vista à Porto Henrique.	FZ, POWO, TPL, WFO, APD, GBIF, LMA, LMU, IUCN Red List, Koning (1993), BNRH, Burrows et al. (2018), K
Angiosperms	Eudicots	Apocynaceae Juss.	Carissa	Species	Carissa spinarum L.	Antura edulis Forssk., Antura hadiensis J.F.Gmel., Arduina campenonii Drake, Arduina edulis (Forssk.) Spreng., Arduina inermis (Vahl) K.Schum., Arduina laxiflora (Benth.) K.Schum., Arduina xylopicron (Thouars) Baill., Cabucala brachyantha Pichon, Carandas edulis (Forssk.) Hiern, Carissa axillaris Roxb., Carissa brownii F.Muell., Carissa brownii var. angustifolia Kempe, Carissa brownii var. ovata …		Shrub						1	1	1	1	1				LC		Native	Bambara(MC); Kangamuaze (T,seng); Mphewani (G,tson); Nkanga-Muazi (T)	Food, Medicine, Veterinary	T: Angónia, Ulónguè à Caloga, Fíngoè (próx. Do R. Luatize). Z: Alto Molócuè à Alto Ligonha. S: Nhamatanda (Serra Xiluvo). MC: Pindanganga. G: LNP, Mangandja.	FM, FZ, POWO, IUCN Red List, TPL, WFO, APD, JSTOR, GBIF, LMA, LMU, Koning (1993), Burrows et al. (2018)
Angiosperms	Eudicots	Apocynaceae Juss.	Carissa	Species	Carissa tetramera (Sacleux) Stapf	Arduina tetramera Sacleux		Shrub					1				1	1	1	1				Native			NP: Angoche à Namaponda. S: Entre Muanza e Dondo, Cheringoma (Levasflor, Mpawe, Coutada 12). I: Temane. G: Lagoa Nova à Aldeia da Barragem. MP: Reserva Florestal de Licuáti, Manhiça à Chinhanguanine, Moamba, Umbelúzi, Catuane, Goba (próx. do R. Maiuana).	FZ, POWO, TPL, WFO, APD, GBIF, LMA, LMU, BNRH, Burrows et al. (2018)
Angiosperms	Eudicots	Apocynaceae Juss.	Carvalhoa	Species	Carvalhoa campanulata K.Schum.			Shrub			1		1		1									Native	Cuireuire (NP,macu); Nanti (NP,macu)		CD: Quiterajo, Mueda à Negomano, Mt. Ancuabe, Entre Pundanhar e Nangade. NP: Mossuril àa Matibane, Cabaceira, Namapa à Nacarôa, Nguepo, Monapo, Mt. Ndjidji, Monapo (Reserva Florestal do Sr. Wolf ). Z: Tacuane, Serra Chiperone, Mt. Namuli, Mt. Mabu., Serra Gúruè, Montes de Milange, Serra Tumbine.	Timberlake et al. (2007), Timberlake et al. (2009), FZ, POWO, TPL, WFO, APD, GBIF, LMA, LMU, Koning (1993), BNRH, Burrows et al. (2018), K
Angiosperms	Eudicots	Apocynaceae Juss.	Carvalhoa	Species	Carvalhoa macrophylla K.Schum.	Carvalhoa petiolata K.Schum.		Tree				1			1									Native			NI: Simba Camp em direção ao Pico da Serra Mecula. Z: Mt. Mabu.	FM, FZ, POWO, TPL, WFO, APD, GBIF, LMA, LMU, BNRH, Burrows et al. (2018)
Angiosperms	Eudicots	Apocynaceae Juss.	Cascabela	Species	Cascabela thevetia (L.) Lippold	Cascabela peruviana (Pers.) Raf., Cerbera linearifolia Stokes, Cerbera peruviana Pers., Cerbera thevetia L., Thevetia linearis Raf., Thevetia linearis A. DC., Thevetia neriifolia Juss. ex A.DC., Thevetia neriifolia var. hirsuta Müll.Arg., Thevetia neriifolia var. leucantha Müll.Arg., Thevetia neriifolia var. pubescens Müll.Arg., Thevetia peruviana (Pers.) K.Schum., Thevetia peruviana f. aurantiac…		Shrub												1				Introduced			MP: Chobela, Baía de Maputo, Catembe, Próximo da Faculdade de Agronomia.	POWO, Da Silva et al. (2004), TPL, APD, GBIF, LMU
Angiosperms	Eudicots	Apocynaceae Juss.	Catharanthus	Species	Catharanthus roseus (L.) G.Don	Ammocallis rosea (L.) Small, Lochnera rosea (L.) Rchb. ex Spach, Pervinca rosea (L.) Gaterau, Vinca rosea L., Vinca speciosa Salisb.		Shrub			1		1	1	1	1	1	1	1	1				Introduced		Medicine	CD: Pemba, Ancuabe. NP: Ribáuè. T: Missão São José de Boroma. Z: Mt. Mabu. S: Bué Maria, Nhambita, GNP, Condué, Inhaminga, Serra Gorongosa (Nhancuco, Cascatas de Morumbodzi). MC: Vale do R. Révuè, Zomba à Magorogodo, Hotel Castelo Branco (Chimoio). I: Vilanculos, Zavala, Cidade de Inhambane, Zandamela. G: Xai-Xai. MP: Chinhambanine, Ilha de Inhaca, Ungabane, REM.	FM, FZ, POWO, TPL, WFO, APD, GBIF, LMA, LMU, Bruschi et al. (2011)
Angiosperms	Eudicots	Apocynaceae Juss.	Ceropegia	Species	Ceropegia albipilosa (A.Lancaster ex Peckover) Bruyns	Brachystelma albipilosum A.Lancaster ex Peckover		Herb		Perennial														Native			Norte de Moçambique.	FM, FZ, POWO, TPL, WFO, APD, GBIF, LMA, LMU
Angiosperms	Eudicots	Apocynaceae Juss.	Ceropegia	Species	Ceropegia aloicola M.G.Gilbert			Herb	Succulent	Perennial										1	E			Native			MP: Mts Libombos, Namaacha.	FM, FZ, POWO, TPL, WFO, APD, GBIF, LMA, LMU, Darbyshire et al. (2019), K
Angiosperms	Eudicots	Apocynaceae Juss.	Ceropegia	Species	Ceropegia ampliata E.Mey.	Ceropegia ampliata subsp. madagascariensis Lavranos, Ceropegia ampliata var. oxyloba H.Huber		Herb	Climber	Perennial										1				Native	Nete (MP,rong)		MP: Marracuene.	FM, FZ, POWO, TPL, WFO, APD, GBIF, LMA, LMU, Koning (1993)
Angiosperms	Eudicots	Apocynaceae Juss.	Ceropegia	Species	Ceropegia arenarioides M.G. Gilbert			Herb	Climber	Perennial							1							Native			S: GNP.	FM
Angiosperms	Eudicots	Apocynaceae Juss.	Ceropegia	Species	Ceropegia buchananii (N.E.Br.) Bruyns	Brachystelma buchananii N.E.Br., Brachystelma magicum N.E.Br., Brachystelma nauseosum De Wild., Brachystelma shirense Schltr.		Herb		Perennial					1									Native			Z: Zambézia.	FM, FZ, POWO, TPL, WFO, APD, GBIF, LMA, LMU
Angiosperms	Eudicots	Apocynaceae Juss.	Ceropegia	Species	Ceropegia carnosa E.Mey.	Ceropegia racemosa subsp. setifera (Schltr.) H. Huber, Ceropegia setifera Schltr.		Herb	Climber	Perennial										1				Native			MP: Reserva Florestal de Licuáti.	POWO, TPL, WFO, APD, GBIF
Angiosperms	Eudicots	Apocynaceae Juss.	Ceropegia	Species	Ceropegia chimanimaniensis M.G.Gilbert			Herb	Geophyte							1					NE	LC		Native			MC: Mts Chimanimani.	Darbyshire et al. (2019), IUCN Red List, K
Angiosperms	Eudicots	Apocynaceae Juss.	Ceropegia	Species	Ceropegia circinata (E.Mey.) Bruyns	Brachystelma bolusii N.E.Br., Brachystelma cinereum (Schltr.) N.E.Br., Brachystelma circinatum E.Mey., Brachystelma commixtum N.E.Br., Brachystelma filiforme Harv., Brachystelma galpinii (Schltr.) N.E.Br., Brachystelma ovatum Oliv., Brachystelma pallidum (Schltr.) N.E.Br., Brachystelma undulatum (Schltr.) N.E.Br., Brachystelma zeyheri (Schltr.) N.E.Br., Dichaelia bolusii (N.E.Br.) Schltr., Dichae…		Herb	Geophyte															Native			Locality not known.	POWO, TPL, APD
Angiosperms	Eudicots	Apocynaceae Juss.	Ceropegia	Species	Ceropegia cupulata (R.A.Dyer) Bruyns	Brachystelma cupulatum R.A.Dyer, Brachystelma vahrmeijeri R.A.Dyer, Ceropegia vahrmeijeri (R.A.Dyer) Bruyns		Herb	Geophyte											1	NE			Native			MP: Ponta Malongane à Ponta do Ouro, Norte da Manhiça.	FM, FZ, POWO, TPL, WFO, APD, GBIF, LMA, LMU, Darbyshire et al. (2019), K
Angiosperms	Eudicots	Apocynaceae Juss.	Ceropegia	Species	Ceropegia cyperifolia Bruyns			Herb	Geophyte			1									E	LC		Native			NI: Sul de Maúa, Nordeste de Metarica, Lichinga à Mandimba.	FM, FZ, POWO, IUCN Red List, TPL, WFO, APD, JSTOR, GBIF, LMA, LMU, Darbyshire et al. (2019), K
Angiosperms	Eudicots	Apocynaceae Juss.	Ceropegia	Species	Ceropegia distincta N.E.Br.			Herb	Succulent	Perennial			1														NP: Missão Maziotela (Monapo).	POWO, TPL, WFO, APD, GBIF
Angiosperms	Eudicots	Apocynaceae Juss.	Ceropegia	Species	Ceropegia filifolia (Schltr.) Bruyns	Brachystelma filifolium (Schltr.) Peckover, Macropetalum filifolium Schltr., Tenaris filifolia (Schltr.) N.E.Br.		Herb	Geophyte											1				Native			MP: Namaacha.	POWO, TPL, WFO, APD, GBIF
Angiosperms	Eudicots	Apocynaceae Juss.	Ceropegia	Species	Ceropegia filipendula K.Schum.	Ceropegia dichroantha K.Schum., Ceropegia medoensis N.E.Br., Ceropegia mirabilis H.Huber, Ceropegia peteri Werderm., Ceropegia renzii Stopp		Herb		Perennial	1													Native			CD: Entre R. Lugenda e Ibo.	FM, FZ, POWO, TPL, WFO, APD, GBIF, LMA, LMU
Angiosperms	Eudicots	Apocynaceae Juss.	Ceropegia	Species	Ceropegia gracilidens Bruyns			Herb	Geophyte		1		1		1						E			Native			CD: Norte de Nantulo. NP: Este de Ribáuè. Z: Norte de Lioma.	FM, FZ, POWO, TPL, WFO, APD, GBIF, LMA, LMU, Darbyshire et al. (2019), K
Angiosperms	Eudicots	Apocynaceae Juss.	Ceropegia	Species	Ceropegia lugardiae N.E.Br.	Ceropegia apiculata Schltr., Ceropegia distincta subsp. lugardiae Huber, Ceropegia distincta var. pubescens H.Huber, Ceropegia distincta subsp. verruculosa R.A.Dyer, Ceropegia verruculosa (Dyer) D.V.Field		Herb	Climber	Perennial	1													Native			CD: Entre Pundanhar e Nangade.	POWO, TPL, APD, BNRH, K
Angiosperms	Eudicots	Apocynaceae Juss.	Ceropegia	Species	Ceropegia meyeri Decne.	Ceropegia pubescens E.Mey.		Herb		Perennial														Native			Locality not known.	FM, POWO, TPL, APD
Angiosperms	Eudicots	Apocynaceae Juss.	Ceropegia	Species	Ceropegia muchevensis M.G.Gilbert			Herb	Succulent	Perennial							1				E			Native			S: Mucheve.	FM, FZ, POWO, TPL, WFO, APD, GBIF, LMA, LMU, Darbyshire et al. (2019), K
Angiosperms	Eudicots	Apocynaceae Juss.	Ceropegia	Species	Ceropegia namuliensis Bruyns	Ceropegia tanzamalawiense Masinde		Herb		Perennial					1									Native			Z: Encosta norte do Mt. Namuli.	FM, FZ, POWO, TPL, WFO, APD, GBIF, LMA, LMU, K
Angiosperms	Eudicots	Apocynaceae Juss.	Ceropegia	Species	Ceropegia nilotica Kotschy	Ceropegia boussingaultiifolia Dinter, Ceropegia constricta N.E.Br., Ceropegia gemmifera K.Schum., Ceropegia gossweileri S.Moore, Ceropegia grandis E.A.Bruce, Ceropegia mozambicensis Schltr., Ceropegia plicata E.A.Bruce		Herb		Perennial						1	1							Native			S: Beira à 5 km do Sul de Mambone. MC: Reserva Florestal de Moribane (Tava Marsh).	FM, FZ, POWO, TPL, WFO, APD, GBIF, LMA, LMU
Angiosperms	Eudicots	Apocynaceae Juss.	Ceropegia	Species	Ceropegia nutans (Bruyns) Bruyns	Brachystelma nutans Bruyns		Herb	Geophyte						1						E	VU		Native			Z: Mt. Namuli.	FM, FZ, IUCN Red List, POWO, TPL, WFO, APD, JSTOR, GBIF, LMA, LMU, Darbyshire et al. (2019), K
Angiosperms	Eudicots	Apocynaceae Juss.	Ceropegia	Species	Ceropegia pachystelma Schltr	Ceropegia acacietorum Schltr. ex Dinter, Ceropegia obscura N.E.Br., Ceropegia pachystelma subsp. undulata (N.E.Br.) H.Huber, Ceropegia schinziana Bullock, Ceropegia undulata N.E.Br.		Herb		Perennial										1				Native			MP: Baía de Maputo.	FM, FZ, POWO, TPL, WFO, APD, GBIF, LMA, LMU
Angiosperms	Eudicots	Apocynaceae Juss.	Ceropegia	Species	Ceropegia paricyma N.E.Br.	Ceropegia dentata N.E.Br., Ceropegia mutabilis Werderm.		Herb	Geophyte					1					1					Native			T: Marávia, Cahora Bassa. I: Macome, Madanda.	FM, FZ, POWO, TPL, WFO, APD, GBIF, LMA, LMU
Angiosperms	Eudicots	Apocynaceae Juss.	Ceropegia	Species	Ceropegia praelonga (S.Moore) Bruyns	Brachystelma praelongum S.Moore		Herb	Geophyte							1											MC: Sussundenga (Candini).	POWO, K
Angiosperms	Eudicots	Apocynaceae Juss.	Ceropegia	Species	Ceropegia purpurascens K.Schum.	Ceropegia kassneri S.Moore, Ceropegia kwebensis N.E.Br., Ceropegia purpurascens subsp. thysanotos (Werderm.) H.Huber, Ceropegia thysanotos Werderm.		Herb		Perennial				1										Native			T: Songo.	POWO, TPL, WFO, APD, GBIF
Angiosperms	Eudicots	Apocynaceae Juss.	Ceropegia	Subspecies	Ceropegia racemosa N.E.Br. subsp. glabra H.Huber	Ceropegia carnosa subsp. glabra (H.Huber) Bruyns		Herb	Climber	Perennial						1								Native			MC: Sussundenga (Chibuco).	POWO, K, APD
Angiosperms	Eudicots	Apocynaceae Juss.	Ceropegia	Species	Ceropegia sandersonii Decne. ex Hook.f	Ceropegia monteiroae Hook.f., Ceropegia sandersoniae Hook.f.		Herb	Succulent	Perennial										1	NE			Native			MP: Marracuene, Costa do Sol, Ilha Chifuaundze, Entre Bela Vista e Porto Henrique.	FM, FZ, POWO, TPL, WFO, APD, GBIF, LMA, LMU, Darbyshire et al. (2019), K
Angiosperms	Eudicots	Apocynaceae Juss.	Ceropegia	Species	Ceropegia simplex (Schltr.) Bruyns	Brachystelma simplex Schltr.		Herb		Perennial		1	1						1					Native			NI: Cuamba (Correia). NP: Lalaua (Màssi). I: Massinga (Mabumbule).	FM, FZ, POWO, TPL, WFO, APD, K
Angiosperms	Eudicots	Apocynaceae Juss.	Ceropegia	Subspecies	Ceropegia stapeliiformis Haw. subsp. serpentina (E.A.Bruce) R.A.Dyer	Ceropegia serpentina E.A.Bruce, Ceropegia stapeliiformis var. serpentina (E.A.Bruce) H.Huber		Herb	Succulent	Perennial														Native			Southern Mozambique	POWO, TPL, APD
Angiosperms	Eudicots	Apocynaceae Juss.	Ceropegia	Species	Ceropegia stenantha K.Schum.	Ceropegia angustiloba De Wild., Ceropegia infausta N.E.Br., Ceropegia mazoensis S.Moore, Ceropegia quarrei De Wild., Ceropegia stenantha var. parviflora N.E.Br., Ceropegia tenuissima S.Moore		Herb	Succulent	Perennial		1												Native			NI: 36 Km NNW de Naulixa.	FM, FZ, POWO, TPL, WFO, APD, GBIF, LMA, LMU
Angiosperms	Eudicots	Apocynaceae Juss.	Ceropegia	Species	Ceropegia tavalla (K.Schum.) Bruyns	Brachystelma tavalla K.Schum.		Herb		Perennial														Native			Norte de Moçambique.	FM, FZ, POWO, TPL, WFO, APD, GBIF, LMA, LMU
Angiosperms	Eudicots	Apocynaceae Juss.	Chlorocyathus	Species	Chlorocyathus monteiroae Oliv.	Raphionacme loandae Schltr. & Rendle, Raphionacme monteiroae (Oliv.) N.E.Br.		Herb	Climber	Perennial							1			1				Native			S: Ao longo da trilha do desfiladeiro de Nhagutua ao posto florestal, GNP, Cheringoma. MP: Baía de Maputo.	FM, FZ, POWO, TPL, WFO, APD, GBIF, LMA, LMU
Angiosperms	Eudicots	Apocynaceae Juss.	Cordylogyne	Species	Cordylogyne globosa E. Mey.			Herb	Geophyte											1				Native	Pumbulo (MP)		MP: Moamba à Chinhanguanine.	FM, FZ, POWO, TPL, WFO, APD, LMA, Koning (1993)
Angiosperms	Eudicots	Apocynaceae Juss.	Cryptolepis	Species	Cryptolepis apiculata K.Schum.			Herb	Climber							1	1							Native			MC: Chimoio, Montes Belas. S: Gorongosa (Mucoza a Vema).	FM, FZ, POWO, TPL, WFO, APD, GBIF, LMA, LMU
Angiosperms	Eudicots	Apocynaceae Juss.	Cryptolepis	Species	Cryptolepis hypoglauca K. Schum. ex Engl.			Herb	Climber		1													Native			CD: Abaixo da escarpa à noroeste da Floresta Namacubi (oeste de Quiterajo).	FM, FZ, POWO, TPL, WFO, APD, GBIF, LMA, LMU, K
Angiosperms	Eudicots	Apocynaceae Juss.	Cryptolepis	Species	Cryptolepis oblongifolia Schltr.	Cryptolepis acutifolia (Sond.) N.E. Br., Cryptolepis angolensis Welw. ex Hiern, Cryptolepis arenicola Dinter, Cryptolepis baumii N.E. Br., Cryptolepis brazzaei Baill., Cryptolepis buxifolia Chiov., Cryptolepis debeerstii De Wild., Cryptolepis elliotii Schltr., Cryptolepis hensii N.E. Br., Cryptolepis linearis N.E. Br., Cryptolepis myrtifolia (Baill.) Schltr., Cryptolepis nigritana (Benth.) N.E. B…		Shrub						1	1	1				1				Native		Medicine	Z: Alto Molócuè, Entre Gúruè e Ile. T: Mt. Zóbuè, Fíngoè à Nhimbe, Ulónguè. MC: Sela entre os rios Mutandani e Mevumozi (leste dos Mts Chimanimani), Entre Espungabera e a Missão Católica, Entre Catandica e o rio Púnguè, Gondola (a 5 km da serração Braunstein). MP: Baía de Maputo.	FZ, POWO, TPL, WFO, APD, GBIF, LMA, LMU, Conde et al. (2014), K, Wursten et al. (2017)
Angiosperms	Eudicots	Apocynaceae Juss.	Cryptolepis	Species	Cryptolepis obtusa N.E.Br.	Cryptolepis obtusa K.Schum.		Herb	Climber	Perennial		1	1	1	1	1	1	1	1	1				Native			NI: Margem do R. Luaho. NP: Memba à Nacala. T: Tete, Cahora Bassa. Z: Vale inferior do R. Chire, Mutarara (na margem do R. Zambeze), Mopeia (Aldeia comunal de Nova Esperança, na margem direita do rio Zambeze). S: Chupanga, Inhaminga, GNP (Nhascuvo Ranger Camp; Rio Vunduzi abaixo do Bunga Ranger Camp). MC: CNR (Acampamento no portão principal). I: Maxixe à Homoíne. G: Macia, Mubanguine (em Guijá).…	FM, FZ, POWO, TPL, WFO, APD, GBIF, LMA, LMU, BNRH
Angiosperms	Eudicots	Apocynaceae Juss.	Cryptolepis	Species	Cryptolepis pendulina (Venter & D.V.Field) P.I.Forst.	Stomatostemma pendulina Venter & D.V.Field		Shrub					1		1						E	VU		Native			NP: Serra Ribáuè, Mt. Napitu, Próx. de Namina. Z: Mt. Lico.	FM, FZ, POWO, TPL, WFO, APD, GBIF, LMA, LMU, Darbyshire et al. (2019), K
Angiosperms	Eudicots	Apocynaceae Juss.	Cryptostegia	Species	Cryptostegia grandiflora Roxb. ex R.Br.	Cryptostegia grandiflora var. tulearensis Costantin & Gallaud, Nerium grandiflorum (Roxb. ex R.Br.) Roxb.		Shrub									1							Introduced			S: Catapú (numa Machamba Experimental).	FM, FZ, POWO, TPL, WFO, APD, GBIF, LMA, LMU, BNRH
Angiosperms	Eudicots	Apocynaceae Juss.	Cryptostegia	Species	Cryptostegia madagascariensis Bojer ex Decne.	Cryptostegia glaberrima Hochr., Cryptostegia madagascariensis var. glaberrima (Hochr.) Marohasy & P.I.Forst., Cryptostegia madagascariensis var. septentrionalis Marohasy & P.I.Forst.		Liana											1					Introduced			I: Vilanculos.	POWO, APD, TPL, FM
Angiosperms	Eudicots	Apocynaceae Juss.	Cynanchum	Species	Cynanchum ellipticum (Harv.) R.A.Dyer	Bunburia elliptica Harv., Cynoctonum capense E.Mey.		Herb	Climber	Perennial								1		1				Native			G: Próx. De Xai-Xai, Praia de Chongoene à Praia Sepúlveda. MP: I. Inhaca.	FM, FZ, POWO, TPL, WFO, APD, GBIF, LMA, LMU
Angiosperms	Eudicots	Apocynaceae Juss.	Cynanchum	Species	Cynanchum ethiopicum Liede & Khanum	Pentarrhinum abyssinicum Decne.		Herb	Climber	Perennial						1								Native			MC: Reserva Florestal de Moribane.	FM, POWO, APD, GBIF, LMA, K, BNRH
Angiosperms	Eudicots	Apocynaceae Juss.	Cynanchum	Species	Cynanchum gerrardii (Harv.) Liede	Cynanchum sarcostemmatoides K.Schum., Sarcocyphula gerrardii Harv.		Herb	Succulent	Perennial							1		1	1				Native		Food	S: Entre Divinhe e Cherinda, GNP (Desfiladeiro "Archway", Rio Mueredze). I: I. Magaruque, Mabote para o a campamento da Safarilândia de Zinave, Entre Vilanculos e Mapinhane, Pomene. MP: Ilha de inhaca, Boane à Porto Henrique, Mazeminhama, Entre Ngunelelene e a estrada da Catembe.	FM, FZ, POWO, TPL, WFO, APD, GBIF, LMA, LMU, K
Angiosperms	Eudicots	Apocynaceae Juss.	Cynanchum	Species	Cynanchum insipidum (E.Mey.) Liede & Khanum	Pentarrhinum insipidum E.Mey.		Herb	Climber	Perennial							1	1		1				Native			S: GNP (Ao longo da estrada do portão de entrada para Chitengo). G: Lagoa Pave, Massingir para as margens do Rio Shingwidzi. MP: REM (Margem direita do rio Fúti), I. Inhaca.	POWO, TPL, WFO, APD, GBIF
Angiosperms	Eudicots	Apocynaceae Juss.	Cynanchum	Species	Cynanchum mossambicense K.Schum.	Cynanchum complexum N.E.Br.		Herb	Climber	Perennial					1		1	1	1	1				Native			Z: Chinde à Luabo, Quelimane, Mazaro, Chamo. S: Floresta Chupanga, I. Chiloane. I: Mambone (margens do rio Save), Vilanculos. G: Caniçado (margens do rio Limpopo). MP: Boane, Namaacha (Goba).	FM, FZ, POWO, TPL, WFO, APD, GBIF, LMA, LMU
Angiosperms	Eudicots	Apocynaceae Juss.	Cynanchum	Species	Cynanchum obtusifolium L.f.	Cynanchum capense R. Br., Cynanchum dregeanum Decne., Cynanchum obtusifolium var. pilosum Schltr., Cynoctonum brownii Meisn., Cynoctonum capense (R. Br.) E. Mey., Cynoctonum crassifolium E.Mey., Cynoctonum dregeanum Decne., Vincetoxicum capense (R. Br.) Kuntze, Vincetoxicum dregeanum (Decne.) Kuntze, Vincetoxicum dregeanum Kuntze, Vincetoxicum obtusifolium (L. f.) Kuntze		Herb	Climber	Perennial										1				Native			MP: Macaneta, Ilha de Inhaca, Ponta de Ouro.	FM, FZ, POWO, TPL, WFO, APD, GBIF, LMA, LMU
Angiosperms	Eudicots	Apocynaceae Juss.	Cynanchum	Species	Cynanchum oresbium (Bruyns) Goyder	Sarcostemma oresbium Bruyns		Herb	Succulent	Perennial			1								E	VU		Native			NP: Serra Ribáuè, Malema, Mt. Wesse.	FM, FZ, POWO, TPL, WFO, APD, GBIF, LMA, LMU, Darbyshire et al. (2019), IUCN Red List, K
Angiosperms	Eudicots	Apocynaceae Juss.	Cynanchum	Species	Cynanchum schistoglossum Schltr.	Cynanchum brevidens N.E.Br., Cynanchum brevidens var. zambesiaca N.E.Br.,Cynanchum dewevrei De Wild. & T.Durand, Cynanchum vagum N.E.Br.		Herb	Climber	Perennial				1	1		1		1					Native			T: Baixo-Zambeze. Z: Namagoa. I: Mucoque (em Vilanculos). S: GNP (Ao longo do caminho do Campo de Chitengo ao Rio Púnguè).	FM, FZ, POWO, TPL, WFO, APD, GBIF, LMA, LMU
Angiosperms	Eudicots	Apocynaceae Juss.	Cynanchum	Subspecies	Cynanchum viminale (L.) L. subsp. mulanjense (Liede & Meve) Goyder	Cynanchum mulanjense (Liede & Meve) Liede & Meve, Sarcostemma mulanjense Liede & Meve		Herb	Succulent	Perennial		1			1											Beliefs, Livestock Fodder	NI: Cuamba, 30 km a SE de Marrupa. Z: Mt. Namuli.	POWO, TPL, WFO, APD, GBIF, LMU
Angiosperms	Eudicots	Apocynaceae Juss.	Cynanchum	Subspecies	Cynanchum viminale (L.) L. subsp. suberosum (Meve & Liede) Goyder	Asclepias nuda Thonn. & Schumach., Cynanchum tetrapterum (Turcz.) R.A.Dyer ex Bullock, Monostemma tetrapterum Turcz., Sarcostemma tetrapterum Turcz., Sarcostemma viminale subsp. suberosum Meve & Liede		Herb		Perennial	1													Native			CD: Hunters' concession.	TPL, POWO, APD, K
Angiosperms	Eudicots	Apocynaceae Juss.	Cynanchum	Subspecies	Cynanchum viminale (L.) L. subsp. viminale	Asclepias aphylla Thunb., Cynanchum aphyllum (Schult.) Schltr., Decanemopsis aphylla Costantin & Gallaud, Monostemma aphyllum (Schult.) Turcz., Sarcostemma aphyllum Schult., Sarcostemma madagascariense Desc., Tithymalus pendulus Haw.		Herb	Succulent	Perennial	1		1	1	1	1	1	1	1	1				Native	Neta (G,tson)	Food, Medicine, Veterinary	CD: Baía de Pemba. NP: Murrupula, Ribáuè, Corrane à Muatua, Matibane (Crusse), Serra Chinga. T: Entre Songo e Barragem de Cahora Bassa. Z: Mts Ile. S: Chupanga, GNP (Planalto acima do desfiladeiro de Nhagutua), Santove-Púnguè. MC: Mts Chimanimani, Mt. "Cabeça-do-Velho". I: Vilanculos à Mambone, Entre Funhalouro e Saúte, Pomene, Mabote à Lagoa Banamana, Mabote para o acampamento da Safarilândia de…	FM, POWO, APD, GBIF, LMA, BNRH, Koning (1993), Bandeira et al. (2001), Ribeiro et al. (2010), K
Angiosperms	Eudicots	Apocynaceae Juss.	Cynanchum	Species	Cynanchum virens D.Dietr.	Cynoctonum virens E.Mey., Endotropis meyeri Decne.,	Vincetoxicum virens Kuntze	Herb	Climber	Perennial								1									G: Mabalane à Balule (margens do rio Limpopo), Massingir (próx. do R. Elefantes).	POWO, TPL, WFO, APD, GBIF
Angiosperms	Eudicots	Apocynaceae Juss.	Dictyophleba	Species	Dictyophleba lucida (K.Schum.) Pierre	Landolphia dubreucqiana De Wild., Landolphia lucida K.Schum., Pacouria lucida (K.Schum.) Kuntze		Liana							1	1								Native			Z: Maganja da Costa (Floresta Gobene). MC: Gondola (margens do rio Nhamisenguere), Dombe (Floresta Rinorea; Entre Chissanto à Zinesse), Chimoio, Bandula, Reserva Florestal de Moribane (Ndzou Camp, Picada da dona Candida).	FM, FZ, POWO, TPL, WFO, APD, GBIF, LMA, LMU, BNRH, K
Angiosperms	Eudicots	Apocynaceae Juss.	Diplorhynchus	Species	Diplorhynchus condylocarpon (Müll.Arg.) Pichon	Aspidosperma condylocarpon Müll.Arg., Diplorhynchus angolensis Büttner, Diplorhynchus angustifolia Stapf, Diplorhynchus mossambicensis Benth., Diplorhynchus poggei K.Schum., Diplorhynchus psilopus Welw. ex Ficalho & Hiern, Diplorhynchus welwitschii Rolfe, Neurolobium cymosum Baill.		Tree			1	1	1	1	1	1	1					LC		Native	Kokodji (CD,macu); M'Toa (S); Metoa (S); Muntoa (MC,sho); Mutoa (S); Nhamutumore (S); N'Tombozi (T,seng); Rekossi (NP); Rocochi (CD,Mac);U Rocochi (NI); Rocoogji (CD); Rocoge (CD,macu); Rocossi (NP); Rocotchi (CD,macu); Rucusse (NP); Ucombe (NI)	Fuel, Handicraft, Medicine	CD: Montepuez à Nacuca, Mahate, Meluco, Chiúre, Ancuabe à Mueda, Namatuca, Nangade. NI: Bacia do R. Lugenda, Unango, Mavago, Majune, Lúrio, R. Namarrope, Marrupa à Lichinga, REN (M'Batamila), Marrupa à Nungo. NP: Chalaua, Ribáuè, Liúpo, Moma, Chilama, Capeia, Entre Quixaxe e Lúrio, Memba, Malema à Mutuáli, R. Nalume, Iapala (Mavili I), Entre-Rios à Inago, Namapa à Mirrote (próx. do near aeródromo…	Müller et al. (2012), Timberlake et al. (2009), FZ, POWO, TPL, WFO, APD, GBIF, LMA, LMU, IUCN Red List, Koning (1993), Conde et al. (2014), Krog et al. (2006), Bruschi et al. (2014), Bruschi et al. (2011), Bandeira et al. (2007), Moura et al. (2018), BNRH, Burrows et al. (2018), K
Angiosperms	Eudicots	Apocynaceae Juss.	Emicocarpus	Species	Emicocarpus fissifolius K.Schum. & Schltr.	Lobostephanus palmatus N.E.Br.		Herb		Perennial										1	E	CR		Native			MP: Baía de Maputo.	FM, FZ, POWO, TPL, WFO, APD, GBIF, LMA, LMU, Darbyshire et al. (2019), IUCN Red List, K
Angiosperms	Eudicots	Apocynaceae Juss.	Ephippiocarpa	Species	Ephippiocarpa orientalis (S.Moore) Markgr.	Callichilia orientalis S.Moore		Shrub									1	1	1	1				Native			S: Boca (na margem inferior do R. Búzi). I: Morrumbene à Massinga. G: Manjacaze (Mata do Santos Gil), Floresta Sagrada de Chirindzene, Chongoene. MP: Ponta do Ouro (pela trilha do farol), Salamanga (próx. do R. Fúti).	FZ, POWO, TPL, WFO, APD, GBIF, LMA, LMU, BNRH, Burrows et al. (2018)
Angiosperms	Eudicots	Apocynaceae Juss.	Fockea	Species	Fockea multiflora K.Schum.	Fockea schinzii N.E.Br.		Liana						1										Native			T: Tete.	FM, TPL, POWO, APD
Angiosperms	Eudicots	Apocynaceae Juss.	Funtumia	Species	Funtumia africana (Benth.) Stapf	Funtumia congolana (De Wild.) Jum., Funtumia gilletii (De Wild.) Jum., Funtumia latifolia (Stapf) Stapf, Funtumia latifolia (Stapf) Schltr., Funtumia scheffleri (K.Schum.) Jum., Funtumia zenkeri (K.Schum.) Jum., Kibatalia africana (Benth.) Merr., Kibatalia latifolia (Stapf) Merr., Kibatalia scheffieri (K.Schum.) Merr., Kibatalia zenkeri (K.Schum.) Merr., Kickxia africana Benth., Kickxia latifolia…		Tree			1		1		1	1	1					LC		Native	Inhampuepua (MC); Muri (CD,macu); Nhampepua (MC)		CD: Chomba. NP: Ribáuè. Z: Mt. Mabu, Serra Chiperone. S: Entre rios Chinizíua e Macalaua, Estuário da Savana (a +/- 20 km ao norte da Beira), GNP (desfiladeiro do rio Muzamba, 23 km a sudoeste de Inhaminga e 86 km a ENE da cidade de Gorongosa), Serra Gorongosa, Beira (Serração de Cardoso Lopez), Inhansato. MC: Floresta de Rinorea 8ao norte de Dombe na estrada de Sussendenga), Reserva Florestal de…	Timberlake et al. (2009), FZ, POWO, TPL, WFO, APD, GBIF, LMA, LMU, IUCN Red List, Koning (1993), BNRH, Burrows et al. (2018)
Angiosperms	Eudicots	Apocynaceae Juss.	Glossostelma	Species	Glossostelma cabrae (De Wild.) Goyder	Asclepias cabrae De Wild., Xysmalobium speciosum S.Moore		Herb		Perennial					1									Native			Z: Alto Ligonha à Gilé.	FM, FZ, POWO, TPL, WFO, APD, GBIF, LMA, LMU
Angiosperms	Eudicots	Apocynaceae Juss.	Glossostelma	Species	Glossostelma carsonii (N.E.Br.) Bullock	Asclepias carsonii (N.E.Br.) Schltr., Asclepias mashonensis Schltr., Gomphocarpus chlorojodina Gilg, Gomphocarpus chlorojodina K.Schum., Schizoglossum carsonii (N.E. Br.) N.E. Br., Xysmalobium carsoni N.E. Br.		Herb		Perennial			1			1								Native			NP: Entre Ribáuè e Malema. MC: Gondola (Serração de Braunstein), Mts Chimanimani (Nhabawa).	Timberlake et al. (2009), FM, FZ, POWO, TPL, WFO, APD, GBIF, LMA, LMU, K
Angiosperms	Eudicots	Apocynaceae Juss.	Glossostelma	Species	Glossostelma spathulatum (K.Schum.) Bullock	Gomphocarpus spathulatus (K.Schum.) Schltr., Schizoglossum spathulatum K. Schum.		Herb		Perennial					1									Native			Z: A cerca de 6 km de Nintulo à Lioma.	FM, FZ, POWO, TPL, WFO, APD, GBIF, LMA, LMU
Angiosperms	Eudicots	Apocynaceae Juss.	Gomphocarpus	Subspecies	Gomphocarpus fruticosus (L.) W.T.Aiton subsp. fruticosus	Apocynum salicifolium Medik., Asclepias angustifolia Schweigg., Asclepias cornuta (Decne.) Cordem., Asclepias crinita (G.Bertol.) N.E.Br., Asclepias fruticosa L., Asclepias glabra Mill., Asclepias virgata Balb., Gomphocarpus angustifolius (Schweigg.) Link, Gomphocarpus arachnoideus E.Fourn., Gomphocarpus cornutus Decne., Gomphocarpus crinitus G.Bertol., Gomphocarpus fruticosus f. brasiliensis Bri…	Oligoron longifolium Raf.	Herb		Perennial			1	1	1	1	1	1	1	1				Native			NP: Malatane. Z: Zalala. T: Cahora Bassa. S: GNP (próx. da Casa dos Hipópotamos; Estrada nº3 antes do cruzamento nº4; Planície do lago Urema). MC: CNR (Nhahomba). I: Zavala. G: Lezírias do Limpopo. MP: Maputo, Porto Henrique à Catuane, Xinavane, Mt. M'Ponduine, Magude.	FM, FZ, TPL, WFO, APD, JSTOR, GBIF
Angiosperms	Eudicots	Apocynaceae Juss.	Gomphocarpus	Species	Gomphocarpus physocarpus E.Mey.	Asclepias brasiliensis (E.Fourn.) Schltr., Asclepias physocarpa (E.Mey.) Schltr., Gomphocarpus brasiliensis E.Fourn.		Herb		Perennial				1				1		1				Native			T: Cahora Bassa. G: Entre Xai-Xai e Chicumbane; Vale do rio Limpopo, entre Chicumbane e Zongoene; 50 Km de Massingir às margens do Rio Shingwidzi. MP: Entre Umbelúzi e Namaacha, Entre Bela Vista e Salamanga, I. Inhaca, Manhiça à Macia, Estatuene.	FM, FZ, POWO, TPL, WFO, APD, GBIF, LMA, LMU
Angiosperms	Eudicots	Apocynaceae Juss.	Gomphocarpus	Species	Gomphocarpus swynnertonii (S.Moore) Goyder & Nicholas	Asclepias nyikana Schltr., Asclepias swynnertonii S.Moore		Herb		Perennial						1								Native			MC: Mt. Xiroso, Encosta ocidental do Mt. Shangani (leste dos Mts Chimanimani), Em direcção ao cume oriental (Mts Chimanimani).	FM, FZ, POWO, TPL, WFO, APD, GBIF, LMA, LMU, K, Wursten et al. (2017)
Angiosperms	Eudicots	Apocynaceae Juss.	Gomphocarpus	Subspecies	Gomphocarpus tomentosus Burch. subsp. tomentosus	Asclepias burchellii Schltr., Asclepias lanata (E. Mey.) Druce, Gomphocarpus lanatus E. Mey.		Herb		Perennial									1	1				Native			I: Cidade de Inhambane. MP: REM, Matutuíne (Machai), Mavalane, Polana.	FM, FZ, TPL, WFO, APD, JSTOR, GBIF, K
Angiosperms	Eudicots	Apocynaceae Juss.	Gymnema	Species	Gymnema sylvestre (Retz.) R.Br. ex Sm.	Asclepias geminata Roxb., Cynanchum lanceolatum Poir., Cynanchum subvolubile Schumach. & Thonn., Gymnema affine Decne. Gymnema alterniflorum (Lour.) Merr., Gymnema formosanum Schltr., Gymnema geminatum R.Br., Gymnema humile Decne., Gymnema melicida Edgew., Gymnema mkenii Harv., Gymnema parvifolium Wall., Gymnema subvolubile Decne., Gymnema sylvestre var. affine (Decne.) Tsiang, Gymnema sylvestre …	Apocynum alterniflorum Lour., Periploca tenuifolia Willd. ex Schult., Vincetoxicum lanceolatum Kuntze	Shrub								1	1			1				Native			S: Reserva Florestal Inhamitanga. MC: Acampamento da Reserva Florestal de Moribane. MP: Salamanga, Mts Libombos.	FZ, POWO, TPL, WFO, APD, GBIF, LMA, LMU, BNRH
Angiosperms	Eudicots	Apocynaceae Juss.	Holarrhena	Species	Holarrhena pubescens (Buch.-Ham.) Wall. ex G.Don	Chonemorpha antidysenterica G.Don, Chonemorpha pubescens (Wall. ex G.Don) G.Don, Echites adglutinatus Burm.f., Echites pubescens Buch.-Ham., Elytropus pubescens (Wall. ex G.Don) Miers, Holarrhena antidysenterica (G.Don) Wall. ex A.DC., Holarrhena antidysenterica Wall., Holarrhena codaga G.Don, Holarrhena febrifuga Klotzsch, Holarrhena fischeri K.Schum., Holarrhena glaberrima Markgr., Holarrhena g…		Shrub			1	1	1	1	1	1	1					LC		Native	Chitombodzi (T); Combanzo (MC); Cumbanzôo (S); Gundalupsa (T); Irakaraka (NI); Mucacho (S); Mucaxu (MC,sho); Muchenga (MC,sho); Muncacho (MC,sho); Mutombozi (T); Nakunhunho (NP); Namele (NP,macu); Nhandimbue (T); Nhanthomole (T); Racaraca (NI); Rakaraka (CD); Rakaraka (NI)	Medicine	CD: Mocímboa da Praia à Mueda, Barragem de Chipembe, Quiterajo, Entre Pemba and Mecúfi, Mt. Ancuabe. NI: Metangula (margem do Lago Niassa), Marrupa à Nungo, REN (R. Metapiri), Mt. Mecula. NP: Namialo à Meserepane, Mecubúri, Imala, Iapala, Serra Ribáuè, Muecate, Entre Namapa e Nacarôa, Mt. Ndjidji, Mossuril, Entre Ribáuè e Lalaua. Z: Mocuba (margens do R. Licungo), Mts Ile, Entre Mopeia e Mbôbo, M…	FZ, POWO, TPL, WFO, APD, GBIF, LMA, LMU, IUCN Red List, Koning (1993), Bruschi et al. (2011), BNRH, Burrows et al. (2018), K
Angiosperms	Eudicots	Apocynaceae Juss.	Huernia	Species	Huernia erectiloba Leach & Lavranos	Ceropegia erectiloba (L.C.Leach & Lavranos) Bruyns		Shrub	Succulent		1		1		1						E			Native			CD: Quissanga. NP: Serra Inago, Serra Ribáuè, Nampula. Z: Mt. Ile.	FM, FZ, POWO, TPL, WFO, APD, GBIF, LMA, LMU, Darbyshire et al. (2019), K
Angiosperms	Eudicots	Apocynaceae Juss.	Huernia	Subspecies	Huernia hislopii Turrill subsp. hislopii			Herb	Succulent	Perennial						1								Native			MC: Chimoio à Catandica, Rochedos do Révuè (próx. da estrada de Macequece).	FM, FZ, POWO, TPL, WFO, APD, JSTOR, GBIF, LMA, LMU
Angiosperms	Eudicots	Apocynaceae Juss.	Huernia	Subspecies	Huernia hystrix (Hook.f.) N.E.Br. subsp. hystrix	Huernia appendiculata A.Berger		Herb	Succulent	Perennial									1					Native			I: Pande (Inhassoro), Próx. do R. Inharrime (Zavala).	FM, POWO, APD
Angiosperms	Eudicots	Apocynaceae Juss.	Huernia	Species	Huernia kirkii N.E.Br.	Huernia bicampanulata Verd		Herb	Succulent	Perennial								1		1				Native			G: Mabalane, Pafúri. MP: Maputo.	FM, FZ, POWO, TPL, WFO, APD, GBIF, LMA, LMU
Angiosperms	Eudicots	Apocynaceae Juss.	Huernia	Species	Huernia leachii Lavranos	Ceropegia leachiana Bruyns		Herb	Succulent	Perennial						1					NE	LC		Native			MC: Mt. Zembe, Catandica, Chimoio.	FM, FZ, POWO, TPL, WFO, APD, GBIF, LMA, LMU, Darbyshire et al. (2019), IUCN Red List, K
Angiosperms	Eudicots	Apocynaceae Juss.	Huernia	Subspecies	Huernia verekeri Stent subsp. pauciflora (L.C.Leach) Bruyns	Ceropegia verekeri subsp. pauciflora (L.C.Leach) Bruyns, Huernia verekeri var. pauciflora L.C.Leach		Shrub	Succulent								1		1		E			Native			S: GNP (R. Mueredze). I: Sul de Mambone (próx. Da foz do R. Save).	FM, FZ, POWO, TPL, WFO, APD, GBIF, LMA, LMU, Darbyshire et al. (2019), K
Angiosperms	Eudicots	Apocynaceae Juss.	Huernia	Subspecies	Huernia verekeri Stent subsp. verekeri	Huernia verekeri var. stenensonii A.C. White & B. Sloane		Herb	Succulent	Perennial				1										Native			T: R. Zambeze.	FM, FZ, POWO, TPL, WFO, APD, GBIF, LMA, LMU
Angiosperms	Eudicots	Apocynaceae Juss.	Huernia	Variety	Huernia volkartii Werderm. & Peitscher var. repens (Lavranos) Lavranos	Huernia repens Lavranos		Herb	Succulent	Perennial						1					NE			Native			MC: Mt. Espungabera, Garuso.	FM, FZ, POWO, TPL, WFO, APD, GBIF, LMA, LMU, Darbyshire et al. (2019), K
Angiosperms	Eudicots	Apocynaceae Juss.	Huernia	Variety	Huernia volkartii Werderm. & Peitscher var. volkartii	Huernia montana Kers		Herb	Succulent	Perennial						1								Native			MC: Báruè (Capanga).	FM, TPL, POWO, APD, K
Angiosperms	Eudicots	Apocynaceae Juss.	Huernia	Subspecies	Huernia zebrina N.E.Br. subsp. zebrina	Huernia blackbeardiae R.A.Dyer ex H.Jacobsen, Huernia zebrina subsp. magniflora (E.Phillips) L.C.Leach, Huernia zebrina var. magniflora E.Phillips		Herb	Succulent	Perennial								1		1				Native			G: Chicualacuala. MP: REM.	FM, POWO, TPL, WFO, APD
Angiosperms	Eudicots	Apocynaceae Juss.	Hunteria	Species	Hunteria zeylanica (Retz.) Gardner ex Thwaites	Cameraria zeylanica Retz., Gynopogon lanceolatus Kurz, Hunteria africana K.Schum., Hunteria corymbosa Roxb., Hunteria corymbosa var. roxburghiana (Wight) Trimen ex Gamble, Hunteria corymbosa var. salicifolia (Wall. ex A.DC.) Hallier f., Hunteria lanceolata Wall. ex A.DC., Hunteria legocii Livera, Hunteria roxburghiana Wight, Hunteria zeylanica var. africana (K.Schum.) Pichon, Hunteria zeylanica v…		Shrub							1		1					LC		Native	Mudanhanga (MC)		Z: Mopeia, Mt. Chiwawiu (a este de Cuacua Lodge). S: Chupanga, Inhamitanga, Catpau, M'phingwe Lodge, Caia, GNP (Chitengo, Nhambita, borda de Gwasha).	FZ, POWO, TPL, WFO, APD, GBIF, LMA, LMU, IUCN Red List, Koning (1993), BNRH, Burrows et al. (2018)
Angiosperms	Eudicots	Apocynaceae Juss.	Kanahia	Species	Kanahia laniflora (Forssk.) R.Br.	Asclepias coarctata S.Moore, Asclepias fluviatilis A.Chev., Asclepias laniflora Forssk., Asclepias rivalis S.Moore, Gomphocarpus glaberrimus Oliv., Kanahia consimilis N.E.Br., Kanahia glaberrima (Oliv.) N.E. Br.		Herb		Perennial				1	1	1	1	1				LC	Requiring to add Mozambique in the geographic range	Native			T: Cahora Bassa. Z: Mocuba. S: Nhamatanda, Chibabava (margem inferior do R. Búzi), Entre Gorongosa e Marínguè, Gorongosa (margesns do R. Mucodzi), GNP (Rio acima das cataratas de Nharizengere, à noroeste do Parque). MC: Chimoio, cataratas do rio Revuè. G: LNP (Desfiladeiro do Rio Shingwedzi acima do Campo de Safari de Gaza "Macandezulo".	FM, FZ, POWO, IUCN Red List, TPL, WFO, APD, JSTOR, GBIF, LMA, LMU, BNRH
Angiosperms	Eudicots	Apocynaceae Juss.	Landolphia	Species	Landolphia buchananii (Hallier f.) Stapf	Clitandra buchananii Hallier f., Clitandra kilimandjarica Warb., Clitandra semlikiensis Robyns & Boutique, Jasminochyla ugandensis (Stapf) Pichon, Landolphia cameronis Stapf, Landolphia kilimandjarica (Warb.) Stapf, Landolphia rogersii Stapf, Landolphia swynnertonii S.Moore, Landolphia ugandensis Stapf		Shrub					1	1	1	1								Native	Muganga (S)		NP: Mt. Murripa. T: Mt. Zóbuè. Z: Mt. Tumbine, Serra Chiperone, Mts Milange, Serra Morrumbala. MC: Estrada à Tsetsera, Serra Choa.	Müller et al. (2012), FZ, POWO, TPL, WFO, APD, GBIF, LMA, LMU, Koning (1993), BNRH, Burrows et al. (2018), K
Angiosperms	Eudicots	Apocynaceae Juss.	Landolphia	Species	Landolphia kirkii Dyer	Clitandra stapfiana A.Chev., Landolphia delagoensis (Dewèvre) Pierre, Landolphia dondeensis Busse, Landolphia kirkii var. delagoensis Dewèvre, Landolphia polyantha K.Schum.		Shrub			1		1		1	1	1	1	1	1				Native	Bungu (MP); Bungua (I); Bungue (MP,rong); Madogomela (X); Mahungo (MC); M'Ankawa (NP,macu); Maungo (MP,rong); Mavungwa (MP); Mawero (Z); Mawunga (I,tswa); Mawungu (MP,rong); Mbungua (MP); Mbungwa (MP,rong); Mepira (S); M'Pira (CD); Muhungo (S); Muhungua (S); Mungo (S); Nakatohtue (NI); Rapalala (NP); Tamunga (MP); Umbengwane (MP,rong); Vungua (C)	Food	CD: Baía de Pemba, Mt. Ancuabe, Quiterajo à Mucojo, Confluência entre os rios Rovuma e Nthumbue. NP: Ribáuè à Lalaua, Mt. Mepáluè. Z: Matinde. S: Concessão Levasflor (na velha estrada Maciambose, lado Oeste). MC: Mt. Xiroso, Amatongas (margens do R. Nhamissangue), Mt. Chiancanhi, Reserva Florestal de Moribane, Chimoio, Vandúzi, Extremo sul da Floresta Madanda (Entre Chitobe e Muxúngue). I: Entre …	FZ, POWO, TPL, WFO, APD, GBIF, LMA, LMU, Koning (1993), Bruschi et al. (2014), Santo-António and Goulão (2015), BNRH, Burrows et al. (2018), K
Angiosperms	Eudicots	Apocynaceae Juss.	Landolphia	Species	Landolphia parvifolia K.Schum.	Landolphia claessensii De Wild., Landolphia parvifolia var. parvifólia, Landolphia subterranea A.Chev., Pacouria parvifolia (K.Schum.) Hiern		Liana			1	1	1		1					1		LC		Native			CD: Negomano, Planalto de Mueda, Macondes, Mueda à Nantulo, Entre Pundanhar e Nangade. NI: Serra Mecopo (em Maúa). NP: Entre Nova Chaves e Ribáuè. Z: Mt. Currarre. MP: Michafutene.	FM, FZ, POWO, IUCN Red List, TPL, WFO, APD, JSTOR, GBIF, LMA, LMU, BNRH
Angiosperms	Eudicots	Apocynaceae Juss.	Landolphia	Species	Landolphia watsoniana Rombouts	Carpodinus watsoniana (Rombouts) Vogtherr, Cylindropsis watsoniana (Rombouts) Hallier f., Landolphia watsonii Vogtherr		Shrub			1								1			VU		Native			CD: Nangade à Palma. I: Govuro.	FM, FZ, POWO, IUCN Red List, TPL, WFO, APD, JSTOR, GBIF, LMA, LMU, K
Angiosperms	Eudicots	Apocynaceae Juss.	Margaretta	Subspecies	Margaretta rosea Oliv. subsp. whytei (K.Schum.) Mwany.	Margaretta whytei K.Schum.		Herb		Perennial			1		1	1	1							Native		Beliefs	NP: Serra Ribáuè. Z: Entre Gúruè e Mocuba (margens do rio Inchibua), Serra Tumbine, Entre Ile e Mugeba, Serra Chiperone. S: Serra Gorongosa (Nhancuco, nas encostas mais baixas da serra). MC: Serra Garuso, Gondola (próx. do rio Nhamissangue), Bandula, Mavita (Vale do R. Messambuzi), Báruè, Missão Católica de Amatongas, Espungabera, Mts Chimanimani (Campo de Chikukwa), CNR (Acampamento Nhabawa, na …	Timberlake et al. (2009), FM, FZ, POWO, TPL, WFO, APD, GBIF, LMA, LMU, K
Angiosperms	Eudicots	Apocynaceae Juss.	Marsdenia	Species	Marsdenia cynanchoides Schltr.			Liana			1				1		1		1		NE			Native			CD: Quiterajo, Palma. Z: Pebane. S: Dondo, Sul de Muanza. I: 25 km a sudeste de Inhassoro.	FM, FZ, POWO, TPL, WFO, APD, GBIF, LMA, Darbyshire et al. (2019), K
Angiosperms	Eudicots	Apocynaceae Juss.	Marsdenia	Species	Marsdenia faulknerae (Bullock) Omlor	Dregea faulknerae Bullock		Herb	Climber	Perennial														Native			Locality not known.	FM, POWO, TPL, APD
Angiosperms	Eudicots	Apocynaceae Juss.	Marsdenia	Species	Marsdenia floribunda (Brongn.) Schltr	Marsdenia dregea (Harv.) Schltr., Marsdenia floribunda (E.Mey.) N.E.Br., Pterophora dregea Harv., Pterygocarpus floribundus (E.Mey.) Stuntz		Liana												1				Native			MP: Próx. de Goba.	FM, FZ, POWO, TPL, WFO, APD, GBIF, LMA, LMU
Angiosperms	Eudicots	Apocynaceae Juss.	Marsdenia	Species	Marsdenia gazensis S.Moore	Gongronema gazense (S.Moore) Bullock		Liana								1					NE	DD		Native			MC: Rio Kurumadzi.	FM, FZ, POWO, TPL, WFO, APD, GBIF, LMA, LMU, Darbyshire et al. (2019), IUCN Red List, K
Angiosperms	Eudicots	Apocynaceae Juss.	Marsdenia	Species	Marsdenia macrantha (Klotzsch) Schltr.	Dregea macrantha Klotzsch, Marsdenia zambesiaca Schltr., Periploca petersiana Vatke		Liana					1	1		1	1	1	1					Native			NP: Hospital Psiquiátrico de Nampula, Margens do R. Sena. T: Moatize. S: Santove (Via Lavu, Catapú). MC: Entre Mungári e Changara. I: Inhassoro, Mapinhane à Mabote. G: Massingir à Macuma (Chibotane).	FM, FZ, POWO, TPL, WFO, APD, GBIF, LMA, LMU, BNRH
Angiosperms	Eudicots	Apocynaceae Juss.	Marsdenia	Species	Marsdenia rubicunda (K.Schum.) N.E.Br.	Dregea rubicunda K.Schum.		Liana									1							Native			S: Marromeu, Chupanga.	FM, FZ, POWO, TPL, WFO, APD, GBIF, LMA, LMU
Angiosperms	Eudicots	Apocynaceae Juss.	Mascarenhasia	Species	Mascarenhasia arborescens A.DC.	Echites arborescens Bojer ex A.DC., Holarrhena madagascariensis Baker, Lanugia latifolia N.E.Br., Lanugia midrantha (Scott Elliot ex Baker) N.E.Br., Lanugia variegata (Britten & Rendle) N.E.Br., Mascarenhasia angustifolia A.DC., Mascarenhasia angustifolia var. keraudreniana Markgr., Mascarenhasia arborea Boivin ex Dubard, Mascarenhasia arborescens var. boivinii (Dubard) Markgr., Mascarenhasia arb…		Shrub			1		1		1	1	1							Native	Chinana (MC); Chinaua (MC); Chinâua (MC); Chingana (MC); Doucomela (I); Mechingana (MC); Nhampepua (MC); Nimésso (NP)	Handicraft, Medicine, Ornament	CD: Muncuto (em Mocímboa da Praia). NP: Serra Ribáuè, Ribáuè (margens do rio Mecubúri), Serra Chinga, R. N'sapu, R. Malema à Vila de Malema. Z: Nicoadala à Namacurra, Mt. Mabu, Entre Pebane e Mocubela, Maganja da Costa, Alto Molócuè, Gilé à Mamala, Próx. do R. Napome. S: Dondo, Inhansato (Serração Cardoso & Lopes, Ldª), Entre Cheringoma e Inhaminga, Savane, Manga (Lagos do Six Mile), R. Quessemaz…	FZ, POWO, TPL, WFO, APD, GBIF, LMA, LMU, Koning (1993), BNRH, Burrows et al. (2018), K, Wursten et al. (2017)
Angiosperms	Eudicots	Apocynaceae Juss.	Mondia	Species	Mondia ecornuta (N.E.Br.) Bullock	Chlorocodon ecornutum N.E.Br.		Herb	Climber	Perennial														Native		Medicine	Região Norte de Moçambique.	FM, POWO, TPL, WFO, APD
Angiosperms	Eudicots	Apocynaceae Juss.	Mondia	Species	Mondia whitei Skeels	Chlorocodon whitei Hook.f., Chlorocodon whiteii Hook. f		Liana					1		1	1	1							Native			NP: Meconta à Corrane. Z: Mt. Mabu. S: Gorongosa (M'Sunze). MC: Gondola (Missão Católica de Amatongas; R. Nhamissangue; Serração Braunstein), Chimoio, Reserva Florestal de Moribane.	FM, POWO, TPL, WFO, APD, GBIF
Angiosperms	Eudicots	Apocynaceae Juss.	Oncinotis	Species	Oncinotis tenuiloba Stapf	Motandra erlangeri K.Schum., Oncinotis chirindica S.Moore, Oncinotis inandensis J.M.Wood & Evans, Oncinotis natalensis Stapf		Liana					1		1	1	1							Native			NP: Mt. Murripa. Z: Serra Tumbine. S: Serra Gorongosa (Desfiladeiro do R. Muzamba). MC: Dombe (Floresta Rinorea).	Müller et al. (2012), FM, FZ, POWO, TPL, WFO, APD, GBIF, LMA, LMU, BNRH
Angiosperms	Eudicots	Apocynaceae Juss.	Orbea	Subspecies	Orbea carnosa (Stent) Bruyns subsp. keithii (R.A.Dyer) Bruyns	Caralluma fosteri Pillans, Caralluma keithii R.A.Dyer, Caralluma schweickerdtii Oberm., Ceropegia keithii (R.A.Dyer) Bruyns, Pachycymbium keithii (R.A.Dyer) L.C.Leach, Pachycymbium lancasteri Lavranos		Herb	Succulent	Perennial										1				Native			MP: Namaacha (Mts Libombos).	FM, FZ, POWO, TPL, WFO, APD, GBIF
Angiosperms	Eudicots	Apocynaceae Juss.	Orbea	Species	Orbea caudata (N.E.Br.) Bruyns	Caralluma caudata N.E.Br., Ceropegia caudata (N.E.Br.) Bruyns, Orbeopsis caudata (N.E.Br.) L.C.Leach		Herb	Succulent	Perennial		1												Native			NI: Mandimba.	POWO, APD, GBIF, FM
Angiosperms	Eudicots	Apocynaceae Juss.	Orbea	Species	Orbea halipedicola L.C.Leach	Ceropegia halipedicola (L.C.Leach) Bruyns, Orbea halipedicola subsp. septentrionalis L.C.Leach, Stapelia halipedicola (L.C.Leach) P.V.Heath, Stapelia halipedicola var. borealis P.V.Heath		Shrub	Succulent								1				E			Native			S: GNP (Estrada do portão de entrada para Chitengo), Entre rios Búzi e Gorongosa, Cherinda, Próx. ao Lagoa Gambué, 40 km ao norte do R. Save.	FM, FZ, POWO, TPL, WFO, APD, GBIF, LMA, LMU, Darbyshire et al. (2019), K
Angiosperms	Eudicots	Apocynaceae Juss.	Orbea	Species	Orbea longidens (N.E.Br.) L.C.Leach	Ceropegia longidens (N.E.Br.) Bruyns, Stapelia longidens N.E.Br.		Herb	Succulent	Perennial										1	NE			Native			MP: Baía de Maputo, Próx. de Catuane.	FM, FZ, POWO, TPL, WFO, APD, GBIF, LMA, LMU, Darbyshire et al. (2019), K
Angiosperms	Eudicots	Apocynaceae Juss.	Orbea	Species	Orbea melanantha (Schltr) P.V.Bruyns	Caralluma australis Nel, Caralluma leendertziae N.E.Br., Caralluma melanantha (Schltr.) N.E.Br., Caralluma melanantha var. sousae A.C.White ex Gomes e Sousa, Caralluma rubiginosa Werderm., Ceropegia melanantha (Schltr.) Bruyns, Orbeopsis melanantha (Schltr.) L.C.Leach, Orbeopsis sousae (A.C.White ex Gomes e Sousa) Plowes, Stapelia furcata N.E.Br., Stapelia melanantha Schltr.		Herb	Succulent	Perennial										1				Native			MP: Maputo.	FM, FZ, POWO, TPL, WFO, APD, GBIF, LMA, LMU
Angiosperms	Eudicots	Apocynaceae Juss.	Orbea	Species	Orbea paradoxa (Verdoorn) L.C.Leach	Ceropegia paradoxa (I.Verd.) Bruyns, Stapelia paradoxa (I.Verd.) P.V.Heath, Stultitia paradoxa I.Verd.		Herb	Succulent	Perennial										1				Native			MP: Maputo.	FM, FZ, POWO, TPL, WFO, APD, GBIF, LMA, LMU
Angiosperms	Eudicots	Apocynaceae Juss.	Orbea	Species	Orbea rogersii (L. Bolus) Bruyns	Angolluma rogersii (L.Bolus) Plowes, Caralluma rogersii (L.Bolus) E.A.Bruce & R.A.Dyer, Ceropegia rogersii (L.Bolus) Bruyns, Pachycymbium rogersii (L.Bolus) M.G.Gilbert, Stapelia rogersii L.Bolus		Herb	Succulent	Perennial								1						Native			G: Vale do R. Limpopo (em Licilo).	FM, FZ, POWO, TPL, WFO, APD, GBIF, LMA, LMU
Angiosperms	Eudicots	Apocynaceae Juss.	Orbea	Species	Orbea umbracula (M.D. Hend.) L.C. Leach	Ceropegia umbracula (M.D.Hend.) Bruyns, Stapelia umbracula (M.D.Hend.) P.V.Heath, Stultitia umbracula M.D.Hend.		Herb	Succulent	Perennial								1			NE			Native			G: Planície de Save-Limpopo.	FM, POWO, TPL, APD
Angiosperms	Eudicots	Apocynaceae Juss.	Pachycarpus	Species	Pachycarpus appendiculatus E.Mey.	Asclepias appendiculata (E.Mey.) Schltr., Gomphocarpus appendiculatus (E.Mey.) Decne., Gomphocarpus macroglossus Turcz., Xysmalobium appendiculatum (E.Mey.) D.Dietr.		Herb		Perennial										1				Native			MP: Goba, Mts Libombos.	POWO, TPL, WFO, APD, GBIF
Angiosperms	Eudicots	Apocynaceae Juss.	Pachycarpus	Species	Pachycarpus bisacculatus (Oliv.) Goyder	Gomphocarpus bisacculatus Oliv.		Herb		Perennial						1	1							Native			S: Cheringoma (Codzo). MC: CNR, Espungabera.	FM, POWO, TPL, APD
Angiosperms	Eudicots	Apocynaceae Juss.	Pachycarpus	Species	Pachycarpus chirindensis (S.Moore) Goyder	Schizoglossum chirindense S.Moore, Schizoglossum gigantoglossum Weim.		Herb		Perennial						1	1							Native			S: Serra Gorongosa (Mt. Gogógo, Planalto de pastagem nas Cataratas do Morumbodzi). MC: Serra Choa, Macequece, Mavita, Vale do R. Messambuzi, Mts Chimanimani (Encostas abaixo do Mt. Binga).	FM, FZ, POWO, TPL, WFO, APD, GBIF, LMA, LMU, K
Angiosperms	Eudicots	Apocynaceae Juss.	Pachycarpus	Subspecies	Pachycarpus concolor E.Mey. subsp. arenicola Goyder			Herb	Geophyte											1	NE			Native			MP: REM, Zitundo, Ponto do Ouro, Ponta Malongane.	FM, FZ, POWO, TPL, WFO, APD, GBIF, LMA, LMU, Darbyshire et al. (2019), BNRH, K
Angiosperms	Eudicots	Apocynaceae Juss.	Pachycarpus	Species	Pachycarpus lineolatus (Decne.) Bullock	Asclepias browniana S.Moore, Asclepias conspicua N.E.Br., Asclepias inflexa S.Moore, Asclepias lineolata (Decne.) Schltr., Asclepias schweinfurthii N.E.Br., Calotropis busseana K.Schum., Gomphocarpus lineolatus Decne., Pachycarpus mildbraedii Bullock, Pachycarpus schweinfurthii (N.E.Br.) Bullock		Herb		Perennial			1		1	1											NP: Mejuco à Muhala. Z: Namagoa. MC: Gondola (Serração de Braunstein), Vandúzi.	POWO, TPL, WFO, APD, GBIF
Angiosperms	Eudicots	Apocynaceae Juss.	Pachypodium	Species	Pachypodium saundersii N.E.Br.	Pachypodium lealii subsp. saundersii (N.E.Br.) G.D.Rowley		Shrub	Succulent								1	1		1				Native			S: Maringué. G: Massingir à Caniçado, Combomune à Limpopo, Entre Caniçado e Mapai. MP: Namaacha (Monumento dos Pioneiros, Estatuene, Mts Libombos, Boane à Changalane, Margem direita do R. Impamputo).	FZ, POWO, TPL, WFO, APD, GBIF, LMA, LMU, BNRH
Angiosperms	Eudicots	Apocynaceae Juss.	Pergularia	Subspecies	Pergularia daemia (Forssk.) Chiov. subsp. barbata (Klotzsch) Goyder	Doemia barbata Klotzsch, Pergularia barbata (Klotzsch) N.E.Br. ex Brenan		Herb		Perennial							1	1	1	1				Native			S: GNP (Estrada de entrada à Chitengo; Margem do riacho na base do Mt. Bunga, a noroeste do Parque). I: Vilanculos (próx. da praia), Mapinhane. G: Guijá à Mabalane. MP: Marracuene (Povoado "Mulhelvo").	FM, FZ, POWO, TPL, WFO, APD, GBIF, LMA, LMU
Angiosperms	Eudicots	Apocynaceae Juss.	Pergularia	Subspecies	Pergularia daemia (Forssk.) Chiov. subsp. daemia	Asclepias convolvulacea Willd., Asclepias echinata Roxb., Asclepias echinata Decne., Asclepias glabra Forssk., Asclepias muricata Schumach. & Thonn., Asclepias scandens P.Beauv., Cynanchum bicolor Andrews, Cynanchum cordifolium Retz., Cynanchum echinatum Thunb., Cynanchum extensum Jacq., Cynanchum pedunculatum Thunb., Cynanchum pendulum Poir., Doemia aethiopica Decne., Doemia angolensis Decne., D…		Herb		Perennial					1	1	1			1				Native	Tamoni (G,tson)	Medicine	Z: Mt. Mabu, Namagoa, Montes de Metalola, Alto Molócuè. S: Catapú, Serra Xiluvo. MC: +/- 35 km ao norte de Dombe à Sussendenga, Reserva Florestal de Moribane (Mpunga Community Forest Camp), Serra Garuso. MP: Magude, Polana, Baía de Maputo, Entre Umbelúzi e Goba, Mt. M'Ponduine, Bela Vista, Reserva Florestal de Licuáti.	FM, FZ, POWO, APD, JSTOR, GBIF, LMA, LMU, BNRH
Angiosperms	Eudicots	Apocynaceae Juss.	Periglossum	Species	Periglossum mackenii Harv.	Cordylogyne kassnerianum (Schltr.) Eyles, Cordylogyne mossambicense (Schltr.) Eyles, Periglossum kassnerianum (Schltr.) Eyles, Periglossum mossambicense Schltr.		Herb		Perennial										1				Native			MP: Baía de Maputo.	FM, FZ, POWO, TPL, WFO, APD, GBIF
Angiosperms	Eudicots	Apocynaceae Juss.	Pleiocarpa	Species	Pleiocarpa pycnantha (K.Schum.) Stapf	Hunteria breviloba Hallier f., Hunteria pycnantha K.Schum., Pleiocarpa bagshawei S.Moore, Pleiocarpa breviloba (Hallier f.) Stapf, Pleiocarpa flavescens Stapf, Pleiocarpa micrantha Stapf, Pleiocarpa microcarpa Stapf, Pleiocarpa pycnantha var. tubicina (Stapf) Pichon, Pleiocarpa swynnertonii S.Moore, Pleiocarpa tubicina Stapf, Pleiocarpa welwitschii Stapf ex Hiern		Shrub							1		1	1	1			LC		Native	Nhagalaghaze (MC)		Z: Serra Chiperone, Maganja da Costa (Floresta Gobene). S: Cheringoma (Serração Cardoso Lopes), Urema à Inhaminga, Planalto de Cheringoma, Chupanga, Levasflor (Margem norte do R. Chinizíua; Trilha ao longo do rio abaixo dos chalés na Concessão; ± 19 km NE de Condué e ± 21 km SSW de Inhaminga). I: Lagos de Inharrime (perto da EN1). G: Praia de Bilene.	Timberlake et al. (2009), FZ, POWO, TPL, WFO, APD, GBIF, LMA, LMU, IUCN Red List, Koning (1993), BNRH, Burrows et al. (2018)
Angiosperms	Eudicots	Apocynaceae Juss.	Pleioceras	Species	Pleioceras orientale Vollesen			Tree							1		1					VU		Native			Z: Mopeia à Morrumbala. S: Chupanga, Cheringoma (Margem sul da floresta de Inhamitanga perto da linha ferroviária, Coutada 12).	FZ, POWO, TPL, WFO, APD, GBIF, LMA, LMU, IUCN Red List, Burrows et al. (2018)
Angiosperms	Eudicots	Apocynaceae Juss.	Plumeria	Species	Plumeria rubra L.	Plumeria acuminata W.T.Aiton, Plumeria acutifolia Poir., Plumeria angustifolia A.DC., Plumeria arborea Noronha, Plumeria arborescens G.Don, Plumeria aurantia Lodd. ex G.Don, Plumeria aurantia Endl., Plumeria aurantiaca Steud., Plumeria bicolor Ruiz & Pav., Plumeria carinata Ruiz & Pav., Plumeria conspicua G.Don, Plumeria gouanii D.Don ex G.Don, Plumeria incarnata Mill., Plumeria incarnata var. mi…		Shrub												1				Introduced			MP: Maputo.	Da Silva et al. (2004), POWO, FM, APD, TPL
Angiosperms	Eudicots	Apocynaceae Juss.	Raphionacme	Species	Raphionacme globosa Schum.	Raphionacme virgultorum S.Moore		Herb		Perennial										1							MP: Namaacha, próximo da Cascata.	POWO, TPL, WFO, APD, GBIF
Angiosperms	Eudicots	Apocynaceae Juss.	Raphionacme	Species	Raphionacme grandiflora N.E.Br.	Pentagonanthus grandiflorus (N.E.Br.) Bullock, Pentagonanthus grandiflorus subsp. glabrescens (Bullock) Bullock, Raphionacme grandiflora subsp. glabrescens Bullock		Herb		Perennial			1		1									Native			Z: Moebede. NP: Ribáuè à Lalaua, Namapa à Nacarôa.	FM, FZ, POWO, TPL, WFO, APD, GBIF, LMA, LMU
Angiosperms	Eudicots	Apocynaceae Juss.	Raphionacme	Species	Raphionacme longifolia N.E.Br.	Raphionacme decolor Schltr.		Herb		Perennial					1									Native		Food	Z: Morrumbala, Namagoa.	FM, FZ, POWO, TPL, WFO, APD, GBIF, LMA, LMU
Angiosperms	Eudicots	Apocynaceae Juss.	Raphionacme	Species	Raphionacme lucens Venter & R.L.Verh.			Herb	Geophyte											1				Native			MP: Magude.	FM, FZ, POWO, TPL, WFO, APD, GBIF, LMA, LMU
Angiosperms	Eudicots	Apocynaceae Juss.	Raphionacme	Species	Raphionacme procumbens Schltr.			Herb		Perennial										1				Native			MP: Mts Libombos.	FM, FZ, POWO, TPL, WFO, APD, GBIF, LMA, LMU
Angiosperms	Eudicots	Apocynaceae Juss.	Raphionacme	Species	Raphionacme pulchella Venter & R.L.Verh.			Herb	Geophyte							1					NE	EN		Native			MC: Mts Chimanimani (Floresta Makuripini), Serra Mocuta.	FM, FZ, POWO, TPL, WFO, APD, GBIF, LMA, LMU, Darbyshire et al. (2019), IUCN Red List, K
Angiosperms	Eudicots	Apocynaceae Juss.	Raphionacme	Subspecies	Raphionacme splendens Schltr. subsp. splendens	Raphionacme excisa Schltr., Raphionacme jurensis N.E.Br.		Herb		Perennial	1				1	1								Native			CD: Nhica do Rovuma. Z: Moebede. MC: Chimoio.	FM, FZ, POWO, TPL, WFO, APD, GBIF, K, Wursten et al. (2017)
Angiosperms	Eudicots	Apocynaceae Juss.	Raphionacme	Species	Raphionacme welwitschii Schltr. & Rendle	Chlorocyathus welwitschii (Schltr. & Rendle) Bullock, Raphionacme denticulata N.E.Br., Raphionacme verdickii De Wild., Zucchellia angolensis Decne.		Herb	Climber	Perennial		1												Native			NI: 60 km ao norte de Mandimba.	FM, FZ, POWO, TPL, WFO, APD, GBIF, LMA, LMU
Angiosperms	Eudicots	Apocynaceae Juss.	Rauvolfia	Species	Rauvolfia caffra Sond.	Rauvolfia caffra var. natalensis Stapf ex Hiern, Rauvolfia goetzei Stapf, Rauvolfia gonioclada K.Schum. ex Stapf, Rauvolfia inebrians K.Schum., Rauvolfia leucopoda K.Schum. ex Stapf, Rauvolfia mayombensis Pellegr., Rauvolfia natalensis Sond., Rauvolfia obliquinervis Stapf, Rauvolfia ochrosioides K.Schum., Rauvolfia oxyphylla Stapf, Rauvolfia tchibangensis Pellegr., Rauvolfia welwitschii Stapf		Tree				1	1	1	1	1	1			1		LC		Native	Cachoa (MP); Coelho Tchóvo (MP,rong); Dzungururu (MC,sho); Dzungurwe (MC,sho); Mepimbe (MC); Moimbe (MC); Muimbe (T); Mulambasuki (MC,sho); Murambassuco (MC); Murambasuko (MC,sho); Mussanela (NI,macu); M'Wimbi (T); Racaraca (NI); Racaraca (Z); Rakaraka (NI); Rambanssaco (MC)	Medicine	NI: Serra Jéci, Cuamba à Belém. NP: Malema (R. Niola), Serra Ribáuè, Entre Ribáuè e Iapala, Matamane ao R. Namacula. T: Metengo-wa-Mbalame, Angónia, Ulónguè, Macanga (próx. de Furancungo). Z: Entre Mucubi e Lipela (margem do rio Luo), Gúruè (arredores da Plantação da Chá Moçambique), Mts Milange, Serra Chiperone, Missão Munguluni (Lugela). S: Entre Mandingue e Gegogo, GNP (Ao longo do Lago Urema;…	Müller et al. (2012), Timberlake et al. (2009), FM, FZ, POWO, IUCN Red List, TPL, WFO, APD, JSTOR, GBIF, LMA, LMU, Koning (1993), Ribeiro et al. (2010), Burrows et al. (2018), K
Angiosperms	Eudicots	Apocynaceae Juss.	Rauvolfia	Species	Rauvolfia mombasiana Stapf	Rauvolfia monopyrena K.Schum., Rauvolfia sambesiaca Schinz		Shrub			1	1	1	1	1		1		1					Native			CD: Entre Pemba e Mecúfi. NI: REN (ao longo do rio Metapiri). NP: Namapa à Nacarôa. T: Boroma. Z: Nicoadala à Campo, Maganja da Costa (Floresta de Gobene). S: Condué (Levasflor), Margens do rio Chinizíua, Coutada 12 (entre Chupanga e Inhambane), Desfiladeiro do R. Nhamfisse (Zamambo), Marromeu (Ao longo da estrada do acampamento Chironde para a pista de pouso de Mungári, Coutada 12). I: Vilanculo…	FZ, POWO, TPL, WFO, APD, GBIF, LMA, LMU, BNRH, Burrows et al. (2018)
Angiosperms	Eudicots	Apocynaceae Juss.	Riocreuxia	Species	Riocreuxia polyantha Schltr.	Ceropegia burchellii (K.Schum.) H.Huber, Riocreuxia burchellii K.Schum., Riocreuxia flanaganii subsp. segregata R.A.Dyer, Riocreuxia profusa N.E.Br.		Herb	Climber	Perennial					1									Native			Z: Serra Gúruè, M'bobo à Mopeia.	POWO, TPL, WFO, APD, GBIF
Angiosperms	Eudicots	Apocynaceae Juss.	Riocreuxia	Species	Riocreuxia torulosa Decne.	Ceropegia effusa Huber, Ceropegia torulosa E.Mey., Riocreuxia torulosa var. longidens N.E. Br., Riocreuxia torulosa var. obsoleta N.E. Br., Riocreuxia torulosa var. tomentosa N.E. Br., Trichocaulon columnare Nel	Notechidnopsis columnaris (Nel) Lavranos & Bleck	Herb	Climber	Perennial										1				Native			MP: REM (Margem direita do rio Fúti), Moíne, Entre Magude e Delagoa Plantation.	FM, FZ, POWO, TPL, WFO, APD, GBIF
Angiosperms	Eudicots	Apocynaceae Juss.	Saba	Species	Saba comorensis (Bojer ex A.DC.) Pichon	Landolphia comorensis (Bojer ex A.DC.) K.Schum., Landolphia dubia Lassia, Landolphia florida Benth., Pacouria comorensis (Bojer ex A.DC.) Roberty, Pacouria dubia (Lassia) Pichon, Pacouria florida (Benth.) Hiern, Saba florida (Benth.) Bullock, Vahea comorensis Bojer ex A.DC., Vahea florida (Benth.) F.Muell., Willughbeia cordata Klotzsch		Liana			1	1	1		1	1	1							Native	Mobê (X); Moobe (X); Môpe (CD); Muconza (S); Muconza (X); Muhombe (C); Muronja (X); Um-Hombe (CD)	Food	CD: Nango, Planalto de Mueda, Oeste de Quiterajo. NI: Mandimba, Cuamba (margens do R. Lúrio), Litunde, Marrupa à Nungo, REN (Metapiri). NP: Serra Ribáuè, Nitia (próx. do riacho Nancope), Serra Chinga (1 e 2). Z: Milange, Mocuba à Mobede (próx. R. Munhamade), Nicoadala a Namacura, Mt. Mabu, Entre Namarroi e Ile, Entre Mocuba e Namarroi. S: Lamego (margens do rio Muda), Nhambita (beira de Gwasha), …	FM, FZ, POWO, TPL, WFO, APD, GBIF, LMA, LMU, Koning (1993), Bruschi et al. (2014), Santo-António and Goulão (2015), BNRH, K
Angiosperms	Eudicots	Apocynaceae Juss.	Schizozygia	Species	Schizozygia coffaeoides Baill.			Shrub			1	1										LC	Requiring to add Mozambique in the geographic range	Native			CD: Pundanhar. NI: Marrupa (Luwire, Bloco C pelo Rio Lugenda).	FM, IUCN Red List, TPL, APD, BNRH, Burrows et al. (2018), K
Angiosperms	Eudicots	Apocynaceae Juss.	Secamone	Species	Secamone alpini Schult.	Oxystelma secamone (L.) H.Karst., Periploca secamone Thunb., Periploca secamone L., Sarcostemma secamone (L.) Bennet, Secamone thunbergii E.Mey.		Liana							1	1								Native	Chiongororo (MC,sho)		Z: Serra Chiperone, Mt. Mabu, Mt. Namuli, Serra Tumbine. MC: Mavita (Vale do R. Messambuzi), Serra Choa, Serra Macuta, CNR (Ao longo do caminho para o Mt. Binga, pouco antes da travessia do rio Nhamadzi).	Müller et al. (2012), Timberlake et al. (2009), FM, FZ, POWO, TPL, WFO, APD, GBIF, LMA, LMU, Koning (1993), K, Wursten et al. (2017)
Angiosperms	Eudicots	Apocynaceae Juss.	Secamone	Species	Secamone delagoensis Schltr.			Liana										1	1	1	NE			Native			I: Rio das Pedras, Jacubécua. G: Chibuto à Alto Changane. MP: I. Inhaca, Baía de Maputo, Reserva Florestal de Licuáti, Bela Vista, Cidade de Maputo (Próx. do quartel; Clube Naval até Jardim perto da Avenida F. Engels), Chinhanguanine.	FM, FZ, POWO, TPL, WFO, APD, GBIF, LMA, LMU, Darbyshire et al. (2019), K
Angiosperms	Eudicots	Apocynaceae Juss.	Secamone	Species	Secamone filiformis (L.f.) J.H.Ross	Astephanus frutescens E.Mey., Astephanus fruticosus Steud., Secamone frutescens (E.Mey.) Decne.		Liana										1		1				Native			G: 5 km ao Sul de Chidenguele. MP: Manhiça à Calanga, I. Inhaca, REM, Ponta do Ouro à Zitundo, Mt. Inhaca.	FM, FZ, POWO, TPL, WFO, APD, GBIF, LMA, LMU, BNRH
Angiosperms	Eudicots	Apocynaceae Juss.	Secamone	Species	Secamone parvifolia (Oliv.) Bullock	Secamone zambesiaca var. parvifolia N.E. Br.		Shrub			1		1	1				1	1	1				Native	Nyokani (G,tson)	Medicine	CD: Planalto Mueda, Mecúfi, Ao norte de Quiterajo, Farol de Cabo Delgado (a cerca de 20 km a noreste de Palma), Arquipélago das Quirimbas (I. Vamizi). NP: Floresta de Matibane, Monapo. T: Cahora Bassa. I: Banamana para Machaíla, Mabote à Lago Banamana. G: LNP. MP: Estação Zootécnica de Impamputo, Entre Moamba e Sábiè (margens do rio Incomáti), Porto Henrique.	FZ, POWO, TPL, WFO, APD, GBIF, LMA, LMU, Koning (1993), BNRH, K
Angiosperms	Eudicots	Apocynaceae Juss.	Secamone	Species	Secamone punctulata Decne.	Secamone micrandra K.Schum., Secamone sansibariensis K.Schum., Secamone stenophylla K.Schum.		Shrub											1	1						Medicine	I: Massinga , ao norte do R. das Pedras. MP: Manhiça à Chinhanguanine.	POWO, TPL, WFO, APD, GBIF, Krog et al. (2006), Barbosa et al. (2020)
Angiosperms	Eudicots	Apocynaceae Juss.	Secamone	Species	Secamone retusa N.E.Br.			Liana																Native			Norte de Moçambique.	FM, FZ, POWO, TPL, WFO, APD, GBIF, LMA, LMU, K
Angiosperms	Eudicots	Apocynaceae Juss.	Sisyranthus	Species	Sisyranthus rhodesicus Weim.			Herb		Perennial						1					NE			Native			MC: Mts Chimanimani.	FM, POWO, TPL, APD, GBIF, K, LMA, Wursten et al. (2017)
Angiosperms	Eudicots	Apocynaceae Juss.	Stapelia	Species	Stapelia gettliffei R.Pott	Ceropegia gettliffei (R.Pott) Bruyns, Gonostemon gettliffei (R.Pott) P.V.Heath		Herb	Succulent	Perennial														Native			Oeste de Moçambique.	FM, FZ, POWO, TPL, WFO, APD, GBIF, LMA, LMU
Angiosperms	Eudicots	Apocynaceae Juss.	Stapelia	Species	Stapelia gigantea N.E.Br.	Ceropegia gigantea (N.E.Br.) Bruyns, Gonostemon giganteus (N.E.Br.) P.V.Heath, Gonostemon giganteus var. marlothii (N.E.Br.) P.V.Heath, Gonostemon giganteus var. nobilis (N.E.Br.) P.V.Heath, Gonostemon giganteus var. pallidus (E.Phillips) P.V.Heath, Gonostemon giganteus var. youngii (N.E.Br.) P.V.Heath, Stapelia cylista C.A.Lückh., Stapelia marlothii N.E.Br., Stapelia nobilis N.E.Br., Stapelia yo…		Herb	Succulent	Perennial								1		1				Native			G: Limpopo à Massagena, Massingir. MP: Namaacha.	FM, FZ, POWO, TPL, WFO, APD, GBIF, LMA, LMU
Angiosperms	Eudicots	Apocynaceae Juss.	Stapelia	Species	Stapelia unicornis C.A.Luckh.	Ceropegia unicornis (C.A.Lückh.) Bruyns, Gonostemon unicornis (C.A.Lückh.) P.V.Heath		Herb	Succulent	Perennial										1	NE			Native			MP: Goba Fronteira.	FM, FZ, POWO, TPL, WFO, APD, GBIF, LMA, LMU, Darbyshire et al. (2019), K
Angiosperms	Eudicots	Apocynaceae Juss.	Stathmostelma	Subspecies	Stathmostelma fornicatum (N.E.Br.) Bullock subsp. fornicatum	Asclepias fornicata N.E. Br., Stathmostelma fornicatum (N.E. Br.) Bullock		Herb		Perennial	1													Native			CD: Pemba.	FM, FZ, POWO, TPL, WFO, APD, GBIF, LMA, LMU
Angiosperms	Eudicots	Apocynaceae Juss.	Stathmostelma	Species	Stathmostelma pauciflorum (Klotzsch) K.Schum.	Asclepias pauciflora (Klotzsch) E.A.Bruce, Gomphocarpus pauciflorus Klotzsch, Stathmostelma reflexum Britten & Rendle		Herb		Perennial				1	1	1								Native			Z: Namagoa. T: Ulónguè. MC: Entre Chimoio e Mungári, Messambuzi à Mavita, Mts Chimanimani (Ao longo do rio Mussapa, área de Nhabawa).	FM, FZ, POWO, TPL, WFO, APD, GBIF, LMA, LMU
Angiosperms	Eudicots	Apocynaceae Juss.	Stathmostelma	Species	Stathmostelma pedunculatum (Decne.) K.Schum.	Asclepias macrantha Hochst. ex Oliv., Asclepias pedunculata (Decne.) Dandy, Asclepias uvirensis S.Moore, Gomphocarpus longipes Oliv., Gomphocarpus pedunculatus Decne., Pachycarpus corniculatus Hochst., Stathmostelma globuliflorum K.Schum., Stathmostelma macranthum (Hochst. ex Oliv.) Schltr.		Herb		Perennial	1													Native			CD: Quiterajo.	FM, FZ, POWO, TPL, WFO, APD, GBIF, LMA, LMU, K
Angiosperms	Eudicots	Apocynaceae Juss.	Stathmostelma	Subspecies	Stathmostelma spectabile (N.E.Br.) Schltr. subsp. spectabile	Asclepias macropetala (Schltr. & K.Schum.) N.E.Br., Asclepias odorata (K.Schum.) N.E.Br., Asclepias pachyclada (K.Schum.) N.E.Br., Stathmostelma macropetalum Schltr. & K.Schum., Stathmostelma odoratum K.Schum., Stathmostelma pachycladum K.Schum.		Herb		Perennial			1											Native			NP: Serra Ribáuè, Mt. Murripa.	FM, FZ, POWO, APD, GBIF
Angiosperms	Eudicots	Apocynaceae Juss.	Stenostelma	Species	Stenostelma corniculatum (E.Mey.) Bullock	Gomphocarpus corniculatus (E.Mey.) D.Dietr., Krebsia corniculata (E.Mey.) Schltr., Lagarinthus corniculatus E.Mey., Schizoglossum corniculatum (E.Mey.) R.A.Dyer		Herb		Perennial										1				Native			MP: Mts Libombos.	POWO, TPL, WFO, APD, GBIF
Angiosperms	Eudicots	Apocynaceae Juss.	Stomatostemma	Species	Stomatostemma monteiroae (Oliv.) N.E.Br.	Cryptolepis monteiroae Oliv.		Liana						1				1		1				Native			T: Em direcção à Changara. G: Massingir à Caniçado. MP: Boane à Porto Henrique, Baía de Maputo.	FM, FZ, POWO, TPL, WFO, APD, GBIF, LMA, LMU, BNRH
Angiosperms	Eudicots	Apocynaceae Juss.	Strophanthus	Species	Strophanthus courmontii Sacleux ex Franch.	Strophanthus courmontii var. kirkii Holmer, Strophanthus courmontii var. fallax Holmes		Liana			1	1	1	1	1	1	1		1					Native	Â-Nâpâcué (NP); Inhatomole (MC); M'Techo (NI); Nâpâcué (NP)		CD: A oeste de Quiterajo. NI: REN (Metapiri), Entre Lúrio e Mepanhira. NP: Margens do rio Monapo, Imala, Muíte, Margens do rio Mogincual, Iapala, Serra Chinga, Ribáuè, Ponte sobre o R. Mecubúri (na estrada de Memba à Cava). T: Entre Zóbuè e Moatize, Tete à Estima, Cahora Bassa (R. Mucangadeze). Z: Mt. Mabu, Entre Mocuba e Maganja da Costa, Namagoa, Nicoadala à Caia. S: GNP (Desfiladeiro do Rio Nh…	FM, FZ, POWO, TPL, WFO, APD, GBIF, LMA, LMU, Koning (1993), BNRH, K
Angiosperms	Eudicots	Apocynaceae Juss.	Strophanthus	Species	Strophanthus gerrardii Stapf			Liana												1				Native			MP: 16 km ao Sul de Goba, Fonte dos Libombos.	FM, FZ, POWO, TPL, WFO, APD, GBIF, LMA, LMU
Angiosperms	Eudicots	Apocynaceae Juss.	Strophanthus	Species	Strophanthus hypoleucos Stapf			Shrub			1	1	1		1							VU		Native	Currapi (NP); M'Rincote (CD,macu); Nacope (CD,macu); Nanchote(NP,macu)		CD: Namecala (Mt. Mandje), Balama à Namuno, Muáge (Mt. Micchurri), Mt. Ancuabe, Montepuez, Metoro, Pemba, QNP. NI: REN (M'Batamila), Marrupa à Nungo, Mecula à Matiquite. NP: Entre Mt. Napitu e Serra Ribáuè, Nova Chaves, Serra Chinga (1 e 2), Ribáuè, Imala, Eráti, Alua à Mejuco, Entre Malema e Ribáuè. Z: Montes Ile, Errego, Mt. Natepo, Munhoco, Mt. Supuco.	FM, FZ, POWO, IUCN Red List, TPL, WFO, APD, JSTOR, GBIF, LMA, LMU, Koning (1993), BNRH, Burrows et al. (2018)
Angiosperms	Eudicots	Apocynaceae Juss.	Strophanthus	Species	Strophanthus kombe Oliv.	Strophanthus hispidus var. kombe (Oliv.) Holmes		Shrub			1	1	1	1	1		1	1	1	1				Native	Duruvane (MC,sho); Sulo(MC,sho); Utsulo (I,tswa); Utsulo (MP,rong); Uturo (S)		CD: 2 km a oeste de Quiterajo (Floresta Namacubi), Pemba, Negomano. NI: REN. NP: Malema T: Boroma, Mazoi, Entre Changara e Mungári, Cahora Bassa (Estrada Barragem à Songo). Z: Chinde, Entre Marral e Quelimane. S: Entre Inhamitanga e Chupanga, 1,18 km ESE de Catapú, Ao norte da Serra Gorongosa, GNP (Picada 12 a ± 5 km de Kivulo e antes do rio Mdoda; Mt. Bunga; Em direcção à Mueredze), Cheringoma (…	Bayliss et al. (2010), FZ, POWO, TPL, WFO, APD, GBIF, LMA, LMU, Koning (1993), BNRH, Burrows et al. (2018), K
Angiosperms	Eudicots	Apocynaceae Juss.	Strophanthus	Species	Strophanthus luteolus Codd			Liana												1				Native			MP: Entre Porto Henrique e Bela Vista, Reserva Florestal de Licuáti, Bela Vista (trilha do N de Gueta), Chinhanguanine à Moamba.	FM, FZ, POWO, TPL, WFO, APD, GBIF, LMA, LMU, BNRH
Angiosperms	Eudicots	Apocynaceae Juss.	Strophanthus	Species	Strophanthus nicholsonii Holmes			Shrub						1										Native			T: R. Zambeze R, 60 km W de Msasa.	FZ, POWO, TPL, WFO, APD, GBIF, LMA, LMU, Burrows et al. (2018)
Angiosperms	Eudicots	Apocynaceae Juss.	Strophanthus	Species	Strophanthus petersianus Klotzsch	Strophanthus grandiflorus (N.E.Br.) Gilg, Strophanthus petersianus var. grandiflorus N.E.Br., Strophanthus sarmentosus var. verrucosus Pax, Strophanthus verrucosus (Pax) Stapf		Liana			1	1	1	1	1	1	1	1	1	1				Native	Chochotse (S); Duruvana (MC); Duruvana (S); Malita (MP,rong); Matondobunge (MC,sho); Nacope (NI,yao); Pongoé (I); Pyongu (I,tswa); Utsulo (G); Utsulo (MP); Uturo (MC)	Medicine	CD: Pemba, Montepuez, Mueda à Mocímboa da Rovuma e Ngapa, Floresta Namacubi (a oeste de Quiterajo). NI: Metangula. NP: Monapo, Nacala-a-Velha à Memba. T: Tete à Changara, Cahora Bassa. Z: Casa Branca (+/- 86km a W. de Nicoadala, na estrada de Caia). S: GNP (Floresta de areia), Serra Xiluvo, Savane, Entre Tesse e Murema, Mt. Nhamacunguio, Concessão Catapú, Chupanga à Inhamitanga. MC: Entre Chimoio…	FM, FZ, POWO, TPL, WFO, APD, GBIF, LMA, LMU, Koning (1993), Conde et al. (2014), BNRH, K
Angiosperms	Eudicots	Apocynaceae Juss.	Strophanthus	Species	Strophanthus speciosus (Ward & Harv.) Reber	Christya speciosa Ward & Harv., Strophanthus capensis A.DC.		Liana									1					LC	Requiring to add Mozambique in the geographic range	Native			S: Serra Gorongosa.	FM, FZ, POWO, IUCN Red List, TPL, WFO, APD, JSTOR, GBIF, LMA, LMU, BNRH
Angiosperms	Eudicots	Apocynaceae Juss.	Strophanthus	Species	Strophanthus welwitschii (Baill.) K.Schum.	Strophanthus angusii F.White, Strophanthus ecaudatus Rolfe, Strophanthus gilletii De Wild., Strophanthus katangensis Staner, Strophanthus parvifolius K.Schum., Strophanthus verdickii De Wild., Zygonerion welwitschii Baill.		Shrub					1														NP: Namialo à Pemba.	POWO, TPL, WFO, APD, BNRH
Angiosperms	Eudicots	Apocynaceae Juss.	Tabernaemontana	Species	Tabernaemontana elegans Stapf	Conopharyngia elegans (Stapf) Stapf, Leptopharyngia elegans (Stapf) Boiteau		Tree			1		1		1	1	1	1	1	1		LC		Native	Cacho (MP); Cachu (MP,rong); Cachuane (MP); Calho (MP,rong); Calhu (G); Calhuana (MP,rong); Catcha (G); Catchlo (MP); Caxuana (MP,rong); È:Ràca:Ràca (NP); Kahlo (MP,rong); Kalhuane (MP,rong); Khahlu (MP,rong); Macachuane (MP); Màxéni (MC); M'Caucau (I); Morére (CD,macu); Muchene (MC); Muxéni (MC); Ncahlu (MP); Nhamacabe (MC); Nhamokaukau (MC); Nhancaca (T); Racaraca (NI); Racaraca Monalé Racarrac…	Food, Medicine	CD: R. Rovuma, QNP, Mocímboa da Praia à Mueda, Ntotwe, Macuce à Ancuabe (R. Upulo). NP: Entre Nampula e Ribáuè, Entre Muatua e Angoche, Entre Nampula e Mogincual, Mt. Titialo, Mutuáli, Entre rios Monapo e Mutivaze. Z: Cundine, 50km a NE de Mopeia Velha na estrada para Quelimane. S: Entre Sena e Desfiladeiro de Lupata, Chupanga, Nhamatanda (margens direita do rio Muda), Cheringoma (Inhamitanga; Co…	FZ, POWO, TPL, WFO, APD, GBIF, LMA, LMU, IUCN Red List, Koning (1993), Bandeira et al. (2001), Barbosa et al. (2020), Ribeiro et al. (2010), Santo-António and Goulão (2015), BNRH, Burrows et al. (2018), K
Angiosperms	Eudicots	Apocynaceae Juss.	Tabernaemontana	Species	Tabernaemontana stapfiana Britten	Conopharyngia bequaertii De Wild., Conopharyngia johnstonii Stapf, Conopharyngia stapfiana (Britten) Stapf, Sarcopharyngia stapfiana (Britten) Boiteau, Tabernaemontana johnstonii (Stapf) Pichon		Tree			1				1	1	1					LC		Native	Maxéni (S); Muxéni (S); M'Chene(MC)	Beliefs	CD: Chomba à Negomano. Z: Serra Chiperone, Mt. Namuli, Mt. Mabu, Gúruè (próx. do R. Malema). S: Serra Gorongosa (Mt. Nhandore; Mt. Gogógo, Mt. Zombué). MC: Mt. Vengo, Mt. Vumba, Serra Garuso, Mts Chimanimani (Gwasha, Mt. Binga), Serra Choa.	Müller et al. (2012), Timberlake et al. (2007), Timberlake et al. (2009), FZ, POWO, TPL, WFO, APD, GBIF, LMA, LMU, IUCN Red List, Koning (1993), BNRH, Burrows et al. (2018), K, Wursten et al. (2017)
Angiosperms	Eudicots	Apocynaceae Juss.	Tabernaemontana	Species	Tabernaemontana ventricosa Hochst. ex A.DC.	Conopharyngia rutshuruensis De Wild., Conopharyngia usambarensis (K.Schum. ex Engl.) Stapf, Conopharyngia ventricosa (Hochst. ex A.DC.) Stapf, Domkeocarpa pendula Markgr., Sarcopharyngia ventricosa (Hochst. ex A.DC.) Boiteau, Tabernaemontana usambarensis K.Schum. ex Engl.		Tree					1		1	1	1					LC		Native	Mechenga (MC,sho); Mucacaxo (MC); Mucalbo (MC,sho); Mucaucau (MC); Muntotasadza (MC,sho); Mutotasadza (MC,sho)	Food	NP: Mt. Murripa, Serra Chinga (1 e 2). Z: Mt. Mabu. S: Cavalo (margens do rio Vanduzi). MC: Entre a Serração de Branstein e Serra Nharo-Nharo, Mt. Murrache, Dombe (Mt. Chiancanhi), Mt. Espungabera, Missão de Maforga (em Gondola), Reserva Florestal de Moribane (Mpunga Camp, Picada da Dona Candida), Sussundenga (Mt. Magorogodo, Zomba).	Müller et al. (2012), FM, FZ, POWO, IUCN Red List, TPL, WFO, APD, JSTOR, GBIF, LMA, LMU, Koning (1993), Bruschi et al. (2014), Santo-António and Goulão (2015), Burrows et al. (2018), K
Angiosperms	Eudicots	Apocynaceae Juss.	Tacazzea	Species	Tacazzea apiculata Oliv.	Periploca apiculata (Oliv.) Roberty, Tacazzea kirkii N.E. Br., Tacazzea welwitschii Baill.		Shrub			1			1	1	1				1				Native			CD: 25 km a nordeste de Ancuabe. T: Próx. de Tete, Changara (margens do rio Luenha), Cahora Bassa (margens do rio Mucangadeze). Z: Mocuba (margens do rio Licungo). MC: Chiramba, Desfiladeiro de Lupata. MP: Entre Bela Vista e Porto Henrique, Salamanga (margens do rio Maputo), Sábiè, Bobole, Mapulanguane à Massingir (ribeiro Machaquire).	FZ, POWO, TPL, WFO, APD, GBIF, LMA, LMU, K
Angiosperms	Eudicots	Apocynaceae Juss.	Vincetoxicum	Species	Vincetoxicum anomalum (N.E.Br.) Meve & Liede	Cynanchum chirindense S.Moore, Cynanchum papillosum Weim., Tylophora anomala N.E.Br., Tylophora mayottae W.D.Stevens, Labat & F.Barthelat, Tylophora urceolata Meve, Vincetoxicum urniflorum Meve & Liede		Liana			1									1				Native			CD: Planalto de Mueda. MP: Reserva Florestal de Licuáti.	FM, FZ, POWO, TPL, WFO, APD, GBIF, LMA, LMU, K
Angiosperms	Eudicots	Apocynaceae Juss.	Vincetoxicum	Species	Vincetoxicum apiculatum (K.Schum.) Meve & Liede	Tylophora apiculata K.Schum.		Herb	Climber								1							Native			S: GNP (10 km NNW de Condué e 34 km SW de Inhaminga, Desfiladeiro do R. Nhamfisse "Zamambo"), Cheringoma (Forest road North of Nhago, Coutada 12)	FM, FZ, POWO, TPL, WFO, APD, GBIF, LMA, LMU, BNRH
Angiosperms	Eudicots	Apocynaceae Juss.	Vincetoxicum	Species	Vincetoxicum cernuum (Decne.) Meve & Liede	Astephanus arenarius Decne., Astephanus cernuus Decne., Astephanus ovatus Decne., Astephanus recurvatus Klotzsch, Microstephanus cernuus (Decne.) N.E.Br., Periploca ovata Poir. ex Decne., Pleurostelma cernuum (Decne.) Bullock, Pleurostelma grevei Baill.		Shrub					1											Native			NP: Ilha de Moçambique.	FM, FZ, POWO, TPL, WFO, APD, GBIF, LMA, LMU
Angiosperms	Eudicots	Apocynaceae Juss.	Vincetoxicum	Species	Vincetoxicum conspicuum (N.E.Br.) Meve & Liede	Tylophora conspicua N.E.Br., Tylophora zenkeri Schltr.		Herb	Climber						1									Native			Z: Zambézia.	FM, FZ, POWO, TPL, WFO, APD, GBIF, LMA, LMU
Angiosperms	Eudicots	Apocynaceae Juss.	Vincetoxicum	Species	Vincetoxicum forrestii (Schltr.) C.Y.Wu & D.Z.Li	Cynanchum balfourianum (Schltr.) Tsiang & H.D.Zhang, Cynanchum forrestii Schltr., Cynanchum forrestii var. conduplicatum Jian Wang & F.Du, Cynanchum forrestii var. stenolobum Tsiang & H.D.Zhang, Cynanchum limprichtii Schltr., Cynanchum muliense Tsiang, Cynanchum steppicola Hand.-Mazz., Vincetoxicum balfourianum (Schltr.) C.Y.Wu & D.Z.Li, Vincetoxicum forrestii var. stenolobum (Tsiang & H.D.Zhang)…		Herb		Perennial					1									Introduced			Z: Mt. Namuli (Topo do vale do R. Licungo).	POWO, TPL, GBIF
Angiosperms	Eudicots	Apocynaceae Juss.	Vincetoxicum	Species	Vincetoxicum inhambanense (Schltr.) Meve & Liede	Tylophora inhambanensis Schltr.		Shrub													E			Native			Locality not known (Machisugo?).	POWO, TPL, APD, GBIF
Angiosperms	Eudicots	Apocynaceae Juss.	Vincetoxicum	Species	Vincetoxicum stenolobum (K. Schum.) Meve & Liede	Astephanus stenolobus K. Schum., Tylophora stenoloba (K. Schum.) N.E. Br.		Herb	Climber		1													Native			CD: Rio Muenhe, abaixo das escarpas a Noroeste da Floresta Namacubi, Oeste de Quiterajo.	FM, FZ, POWO, TPL, WFO, APD, GBIF, LMA, LMU, K
Angiosperms	Eudicots	Apocynaceae Juss.	Voacanga	Species	Voacanga africana Stapf	Voacanga africana var. auriculata Pichon, Voacanga africana var. glabra (K.Schum.) Pichon, Voacanga africana var. lutescens (Stapf) Pichon, Voacanga angolensis Stapf ex Hiern, Voacanga angustifolia K.Schum., Voacanga bequaertii De Wild., Voacanga boehmii K.Schum., Voacanga eketensis Wernham, Voacanga glaberrima Wernham, Voacanga glabra K.Schum., Voacanga klainii Pierre ex Stapf, Voacanga lemosii …		Shrub					1		1	1	1							Native	M'Caucau (MS); Nhagau (MC); Phonda (MC,sho); Ponda (MC,sho); Rauchenga (MC,sho)		NP: Entre-Rios. Z: 50 km NE de Mopeia Velha na estrada para Quelimane. S: Entre Desfiladeiro de Lupata e Sena, Chupanga, GNP (Chitengo, margens do R. Púnguè, Savane, Caia à Nicoadala, Concessão Levasflor à Chinizíua. MC: Sussundenga (Zomba), Gondola (Serração Branstein, rio Nhamisenguere), Reserva Florestal de Moribane, Entre a Serração de Moribane e Matarara do Lucite, R. Búzi, Espungabera.	Müller et al. (2012), FZ, POWO, TPL, WFO, APD, GBIF, LMA, LMU, Koning (1993), BNRH, Burrows et al. (2018)
Angiosperms	Eudicots	Apocynaceae Juss.	Voacanga	Species	Voacanga thouarsii Roem. & Schult.	Annularia natalensis Hochst., Cyclostigma natalense (Hochst.) Hochst., Orchipeda dregei (E.Mey.) DC., Orchipeda dregei (E. Mey.) Scott-Elliot, Orchipeda thouarsii (Roem. & Schult.) Baron, Piptolaena dregei (E.Mey.) A.DC., Tabernaemontana thouarsii (Roem. & Schult.) Palacky, Voacanga dregei E.Mey., Voacanga obtusa K.Schum., Voacanga thouarsii var. dregei (E.Mey.) Pichon, Voacanga thouarsii var. ob…		Tree			1		1		1	1	1	1	1	1		LC		Native	Caua-Caua (X); Èràcaràca (NP); Nkahlo De Machongo (MP,rong); Nkahlo Wa Tsovo (MP,rong)	Medicine	CD: Escarpamento a NW do Planalto de Mueda. NP: Imala à ± 17 km de Mecubúri, Serra Ribáuè, Perto da balsa do rio Shire em direção ao sopé do Mt. Morrumbala. Z: Aringa, Maganja da Costa. S: Chiniziua (perto de Gama, margem esquerda do rio Macalaua), Cheringoma (Chironde, Coutada 12, Savane). MC: Reserva Florestal de Moribane (Tava Marsh), Zomba. I: R. Save, 20 km à Sul de Inhambane. G: Floresta Sa…	FM, FZ, POWO, IUCN Red List, TPL, WFO, APD, JSTOR, GBIF, LMA, LMU, Koning (1993), BNRH, Burrows et al. (2018), K
Angiosperms	Eudicots	Apocynaceae Juss.	Wrightia	Species	Wrightia natalensis Stapf			Tree										1		1				Native	Mudajaissi (G)		G: Massangena. MP: Entre Changalane e Catuane (na cerca da fronteira da Suazilândia, base de Mts Libombos), Santaca, Bela Vista à Porto Henrique, Bela Vista (trilha do norte de Gueta, a oeste até o matagal central de Licuáti).	FZ, POWO, TPL, WFO, APD, GBIF, LMA, LMU, Koning (1993), BNRH, Burrows et al. (2018)
Angiosperms	Eudicots	Apocynaceae Juss.	Xysmalobium	Species	Xysmalobium heudelotianum Decne.	Gomphocarpus rubioides Kotschy & Peyr., Schizoglossum heudelotianum (Decne.) Roberty, Schizoglossum truncatulum K.Schum., Xysmalobium obscurum N.E.Br., Xysmalobium reticulatum N.E.Br., Xysmalobium schumannianum S.Moore		Herb		Perennial		1		1										Native			NI: Lichinga. T: Ulónguè (vale do R. Capambadzi).	FM, FZ, POWO, TPL, WFO, APD, GBIF, LMA, LMU
Angiosperms	Eudicots	Apocynaceae Juss.	Xysmalobium	Species	Xysmalobium stocksii N.E.Br.			Herb		Perennial					1									Native			Z: Chefe Ibo, Namagoa, Maganja da Costa à Mocubela.	FM, FZ, POWO, TPL, WFO, APD, GBIF, LMA, LMU
Angiosperms	Eudicots	Apocynaceae Juss.	Xysmalobium	Species	Xysmalobium undulatum (L.) W.T.Aiton	Asclepias undulata L., Gomphocarpus undulatus (L.) Schltr.		Herb		Perennial		1		1	1									Native			NI: Lichinga à Unango. T: Ulónguè. Z: Mt. Namuli.	Timberlake et al. (2009), FM, FZ, POWO, TPL, WFO, APD, GBIF, LMA, LMU
Angiosperms	Eudicots	Apodanthaceae Tiegh. ex Takht.	Pilostyles	Species	Pilostyles aethiopica Welw.	Berlinianche aethiopica (Welw.) Vattimo-Gil, Berlinianche holtzii (Engl.) Vattimo-Gil, Pilostyles holtzii Engl.		Herb	Parasitic	Perennial							1							Native			S: Serra Gorongosa.	FM, FZ, POWO, TPL, WFO, APD, GBIF, LMA, LMU
Angiosperms	Monocots	Aponogetonaceae Planch.	Aponogeton	Species	Aponogeton desertorum Zeyh. ex Spreng.	Aponogeton dinteri Engl. & K.Krause, Aponogeton eylesii Rendle, Aponogeton holubii Oliv., Aponogeton kraussianus Hochst. ex C.Krauss, Aponogeton leptostachyus E.Mey. ex Engl.		Herb	Aquatic							1						LC		Native			MC: Bárue, Mossurize, Chimoio	GBIF, POWO, IUCN Red List, TPL, WFO, APD, LMA
Angiosperms	Monocots	Aponogetonaceae Planch.	Aponogeton	Species	Aponogeton rehmannii Oliv.	Aponogeton hereroensis Schinz		Herb	Aquatic									1				LC	Requiring to add Mozambique in the geographic range	Native			G: Gaza.	GBIF, POWO, IUCN Red List, TPL, WFO, APD, LMA
Angiosperms	Eudicots	Aquifoliaceae Bercht. & J.Presl	Ilex	Variety	Ilex mitis (L.) Radlk. var. mitis	Ilex capensis Harv. & Sond., Ilex monticola Tul., Prinos laurinus Thury ex Choisy, Celastrus sieberi Bernh. ex Harv. & Sond., Gymnosporia brachystachya Baker, Manglilla milleriana Pers., Myrsine mitis Spreng., Scleroxylum jacquinii Sweet, Scleroxylum mite (L.) Willd.		Tree							1	1	1							Native			S: Serra Gorongosa (Mt. Gogógo, Mt. Zombué). MC: Mts Chimanimani, Tsetsera, Mavita, Tandara, Mt. Xiroco, Vale do Rio Messambúzi, Serra Choa, Serra Zuira. Z: Mt. Namuli.	GBIF, POWO, LMA, Burrows et al. (2018), K, Wursten et al. (2017)
Angiosperms	Monocots	Araceae Juss.	Amorphophallus	Subspecies	Amorphophallus abyssinicus (A.Rich.) N.E.Br. subsp. unyikae (Engl. & Gehrm.) Ittenb. ex Govaerts	Amorphophallus unyikae Engl. & Gehrm.		Herb		Perennial														Native			Locality not known.	POWO, TPL, WFO, FM
Angiosperms	Monocots	Araceae Juss.	Amorphophallus	Species	Amorphophallus goetzei (Engl.) N.E.Br.	Amorphophallus anguineus Peter, Amorphophallus petitianus Malaisse & Bamps, Hydrosme goetzei Engl.		Herb		Perennial					1									Native			Z: Mocuba	GBIF, POWO, TPL, WFO
Angiosperms	Monocots	Araceae Juss.	Amorphophallus	Subspecies	Amorphophallus maximus (Engl.) N.E.Br. subsp. fischeri (Engl.) Ittenb. ex Govaerts	Amorphophallus fischeri (Engl.) N.E.Br., Amorphophallus schliebenii Mildbr., Hydrosme fischeri Engl.		Herb		Perennial	1		1				1							Native			CD: Montepuez, Murrebue, Quiterajo, Mecufi. S: Sena, Mt. Nhadongo. NP: Imala	GBIF, POWO, TPL, WFO, FM, K
Angiosperms	Monocots	Araceae Juss.	Amorphophallus	Species	Amorphophallus mossambicensis (Schott ex Garcke) N.E.Br.	Amorphophallus linearilobus Peter, Amorphophallus swynnertonii Rendle, Corynophallus mossambicensis (Schott ex Garcke) Kuntze, Hydrosme mossambicensis Schott ex Garcke		Herb		Perennial						1	1							Native			MC. S	GBIF, POWO, TPL, WFO, FM
Angiosperms	Monocots	Araceae Juss.	Anchomanes	Species	Anchomanes abbreviatus Engl.			Herb		Perennial	1		1									LC	Requiring to add Mozambique in the geographic range	Native			CD: Ancuabe, Macomia, Nangade. NP: Eráti	GBIF, POWO, IUCN Red List, TPL, WFO, FM, BNRH, K
Angiosperms	Monocots	Araceae Juss.	Colocasia	Species	Colocasia esculenta (L.) Schott	Alocasia dussii Dammer, Alocasia illustris W.Bull, Aron colocasium (L.) St.-Lag., Arum chinense L., Arum colocasia L., Arum colocasioides Desf., Arum esculentum L., Arum lividum Salisb., Arum nymphaeifolium (Vent.) Roxb., Arum peltatum Lam., Caladium acre R.Br., Caladium colocasioides (Desf.) Brongn., Caladium esculentum (L.) Vent., Caladium glycyrrhizum Fraser, Caladium nymphaeifolium Vent., Cal…		Herb		Perennial						1	1							Introduced			MC: Mts Chimanimani. S: GNP	GBIF, POWO, FM
Angiosperms	Monocots	Araceae Juss.	Culcasia	Species	Culcasia angolensis Welw. ex Schott	Culcasia angolensis var. angustifolia Engl., Culcasia barombensis N.E.Br.		Herb		Perennial					1									Native			Z: Gúruè.	GBIF, POWO, TPL, WFO
Angiosperms	Monocots	Araceae Juss.	Culcasia	Species	Culcasia falcifolia Engl.	Culcasia scandens f. ovatifolia Engl.		Herb		Perennial					1	1	1					LC		Native			Z: Serra Gúruè, Serra Chiperone, Morrumbala, Mt. Tumbine. S: Serra Gorongosa. MC: Mossurize	Müller et al. (2012), Timberlake et al. (2009), GBIF, POWO, IUCN Red List, TPL, WFO, K
Angiosperms	Monocots	Araceae Juss.	Culcasia	Species	Culcasia orientalis Mayo			Herb		Perennial	1											DD	Requiring to add Mozambique in the geographic range	Native			CD: Nhica do Rovuma.	POWO, IUCN Red List, TPL, FM, K
Angiosperms	Monocots	Araceae Juss.	Culcasia	Species	Culcasia scandens P.Beauv.	Caladium scandens (P.Beauv.) Willd., Culcasia gracilis N.E.Br., Culcasia lancifolia N.E.Br., Culcasia saxatilis A.Chev., Denhamia scandens (P.Beauv.) Schott		Herb		Perennial						1	1					LC	Requiring to add Mozambique in the geographic range	Native			MC: Mt. Mocuta, Serra Morrumbala. S: Serra Gorongosa	GBIF, POWO, IUCN Red List, TPL, WFO, BNRH
Angiosperms	Monocots	Araceae Juss.	Gonatopus	Species	Gonatopus angustus N.E.Br.	Gonatopus rhizomatosus Bogner & Oberm.		Herb		Perennial				1	1	1				1				Native			T: Songo. Z: Namagoa, Boroma. MC: Mts Chimanimani. MP: Marracuene	GBIF, POWO, TPL, WFO, FM, BNRH, K
Angiosperms	Monocots	Araceae Juss.	Gonatopus	Species	Gonatopus boivinii (Decne.) Engl.	Gonatopus boivinii var. lanceolatus Peter, Zamioculcas boivinii Decne.		Herb		Perennial	1		1		1	1	1							Native			Z: Mocuba, Gúruè, Alto molocuè, Namagoa. S: Serra Gorongosa. MC: Serra Choa. CD: Namatuca, Quiterajo, Palma, Nangade. NP: Reserva Florestal do Sr. Wolf	GBIF, POWO, TPL, WFO, FM, K
Angiosperms	Monocots	Araceae Juss.	Gonatopus	Species	Gonatopus clavatus Mayo			Herb		Perennial	1		1		1							LC		Native			NP: Nampula. Z: Serra Chiperone, Namagoa. CD: QNP, Murrebue, Quiterajo.	Timberlake et al. (2009), GBIF, POWO, IUCN Red List, TPL, WFO, FM, K
Angiosperms	Monocots	Araceae Juss.	Gonatopus	Species	Gonatopus petiolulatus (Peter) Bogner	Gonatopus latilobus K.Krause, Heterolobium dilaceratum Peter, Heterolobium petiolulatum Peter		Herb		Perennial	1											VU		Native			CD: QNP.	GBIF, POWO, IUCN Red List, TPL, WFO, FM, K
Angiosperms	Monocots	Araceae Juss.	Lemna	Species	Lemna aequinoctialis Welw.	Lemna angolensis Welw., Lemna aoukikusa T.Beppu & Murata, Lemna aoukikusa subsp. hokurikuensis T.Beppu & Murata, Lemna blatteri McCann, Lemna eleanorae McCann, Lemna paucicostata Hegelm., Lemna paucicostata var. membranacea Hegelm., Lemna perpusilla var. trinervis Austin, Lemna trinervis (Austin) Small		Herb	Aquatic								1					LC		Native			S: Entre Maneta e Chibondo	GBIF, POWO, IUCN Red List, TPL, WFO, FM
Angiosperms	Monocots	Araceae Juss.	Lemna	Species	Lemna minor L.	Hydrophace minor (L.) Bubani, Lemna cyclostasa Elliott ex Chev., Lemna minima Thuill. ex P.Beauv., Lemna minor var. minima Chev., Lemna minor var. orbiculata Austin, Lemna minor var. oxymitra Hegelm., Lemna monorhiza Montandon, Lemna ovata A.Br. ex C.Kraus, Lemna palustris Haenke ex Mert. & W.D.J.Koc, Lemna rwandensis De Sloove, Lemna vulgaris (Lam.) Lam., Lenticula cyclostasa (Elliott ex Chev.) …		Herb	Aquatic									1	1			LC		Native			G. I.	POWO, IUCN Red List, TPL, WFO, FM
Angiosperms	Monocots	Araceae Juss.	Pistia	Species	Pistia stratiotes L.	Apiospermum obcordatum (Schleid.) Klotzsch, Limnonesis commutata (Schleid.) Klotzsch, Limnonesis friedrichsthaliana Klotzsch, Pistia aegyptiaca Schleid., Pistia aethiopica Fenzl ex Klotzsch, Pistia africana C.Presl, Pistia amazonica C.Presl, Pistia brasiliensis Klotzsch, Pistia commutata Schleid., Pistia crispata Blume, Pistia cumingii Klotzsch, Pistia gardneri Klotzsch, Pistia horkeliana Miq., P…		Herb	Aquatic		1	1			1		1			1		LC		Native	Bahata (NI); Chilulu (Z); Cilulu (Z,sena); E'Lulu (T,chuw); Pchilulu (Z,sena); Tilulu (S,sena); Vié Lulu (Z)		CD: Nhica do Rovuma. NI: Amaramba. Z: Mocuba. S: GNP. MP: Entre Manhiço e Palmeira, Zitundo.	GBIF, POWO, IUCN Red List, TPL, WFO, FM, Koning (1993), BNRH, K
Angiosperms	Monocots	Araceae Juss.	Sauromatum	Species	Sauromatum venosum (Dryand. ex Aiton) Kunth	Alocasia pedata (Link & Otto) Raf., Arisaema venosum (Dryand. ex Aiton) Blume, Arum clavatum Desf., Arum fugax Salisb., Arum pedatum Link & Otto, Arum pedatum Willd., Arum sessiliflorum Roxb., Arum venosum Dryand. ex Aiton, Desmesia venosum (Dryand. ex Aiton) Raf., Jaimenostia fernandopoana Guinea & Gómez Mor., Sauromatum abyssinicum Schott., Sauromatum angolense N.E.Br., Sauromatum guttatum Scho…		Herb		Perennial					1							LC	Requiring to add Mozambique in the geographic range	Native			Z: Serra Gúruè	GBIF, POWO, IUCN Red List, FM
Angiosperms	Monocots	Araceae Juss.	Spirodela	Species	Spirodela polyrhiza (L.) Schleid.	Lemna bannatica Waldst. & Kit. ex Schleid., Lemna major Griff., Lemna maxima Blatt. & Hallb., Lemna obcordata P. Beauv., Lemna orbicularis Kit. ex Schult., Lemna orbiculata Roxb., Lemna polyrrhiza L., Lemna polyrrhiza var. concolor Kurz, Lemna thermalis P.Beauv. ex Nutt., Lemna thermalis P. Beauv., Lemna umbonata A.Br. ex Hegelm., Lenticula polyrrhiza (L.) Lam., Spirodela atropurpurea Montandon, …		Herb	Aquatic						1							LC		Native			Z: Morrumbala	GBIF, POWO, IUCN Red List, TPL, WFO, FM
Angiosperms	Monocots	Araceae Juss.	Stylochaeton	Species	Stylochaeton borumensis N.E.Br.	Stylochaeton angustifolius Peter, Stylochaeton angustifolius var. lanceolatus Peter, Stylochaeton heterophyllus Peter, Stylochaeton heterophyllus f. lobatus Peter, Stylochaeton heterophyllus f. sagittatus Peter, Stylochaeton heterophyllus f. subcordatus Peter, Stylochaeton lobatus N.E.Br., Stylochaeton obliquinervis Peter, Stylochaeton rogersii N.E.Br., Stylochaeton tubulosus Peter		Herb		Perennial	1				1	1								Native			CD: Quiterajo. Z: Boroma, Namagoa. MC: Entre a Ponte do Rio Révuè e Inchope.	GBIF, POWO, TPL, WFO, FM, BNRH, K
Angiosperms	Monocots	Araceae Juss.	Stylochaeton	Species	Stylochaeton euryphyllum Mildbr.			Herb	Geophyte		1		1								NE	VU		Native			CD: Quiterajo, Mueda. NP: Nacala Velha á Memba	GBIF, POWO, TPL, WFO, FM, Darbyshire et al. (2019), BNRH, K
Angiosperms	Monocots	Araceae Juss.	Stylochaeton	Subspecies	Stylochaeton natalense Schott subsp. maximum (Engl.) Bogner & Haigh	Stylochaeton maximum Engl.		Herb	Geophyte											1	NE			Native	Hjené-Hihaâua (I,tswa)		MP: Baía de Maputo.	POWO, FM, Darbyshire et al. (2019), Koning (1993), K
Angiosperms	Monocots	Araceae Juss.	Stylochaeton	Subspecies	Stylochaeton natalense Schott subsp. natalense	Gueinzia natalensis Sond. ex Schott, Stylochaeton gazense Rendle, Stylochaeton hennigii Engl., Stylochaeton tenuinerve Peter		Herb	Rhizomatous						1	1	1	1	1	1				Native	Ganjacacuâli (MC)	Beliefs, Medicine	Z: Reserva Florestal Gilé, Namagoa. S: Cheringoma, Coutada 12, GNP, Madanda Forests. I: Funhalouro, Vilanculos. G: LNP (Zona Tampão). MP: Baía de Maputo, Marracuene, Namaacha, Magude, Matutuíne, Moamba, REM. MC: CNR, Zomba, Floresta Mahate.	POWO, FM, GBIF, LMA, Bruschi et al. (2011), BNRH, K
Angiosperms	Monocots	Araceae Juss.	Stylochaeton	Subspecies	Stylochaeton natalense Schott subsp. obliquinerve (Peter) Bogner & Haigh	Stylochaeton obliquinerve Peter		Herb		Perennial	1													Native			CD: Quiterajo.	POWO, FM, K
Angiosperms	Monocots	Araceae Juss.	Stylochaeton	Species	Stylochaeton puberulum N.E.Br.			Herb		Perennial	1				1		1							Native	Natombija (CD,macu)		CD: Quiterajo, Meluco, Palma, Muaguide (on the Macomia to Metoro). Z: Boroma. S: GNP	GBIF, POWO, FM, Koning (1993), BNRH, K
Angiosperms	Monocots	Araceae Juss.	Stylochaeton	Species	Stylochaeton tortispathum Bogner & Haigh			Herb	Geophyte		1										E	VU		Native			CD: Quiterajo.	POWO, FM, Darbyshire et al. (2019), K
Angiosperms	Monocots	Araceae Juss.	Wolffia	Species	Wolffia arrhiza (L.) Horkel ex Wimm.	Bruniera vivipara Franch., Horkelia arrhiza (L.) Druce, Lemna arrhiza L., Lenticula arrhiza (L.) Lam., Wolffia delilii Miq.		Herb		Perennial								1	1			LC		Native			G. I.	GBIF, POWO, IUCN Red List, FM
Angiosperms	Monocots	Araceae Juss.	Wolffiella	Species	Wolffiella denticulata (Hegelm.) Hegelm.	Wolffia denticulata Hegelm.		Herb		Perennial								1	1			LC		Native			G. I.	GBIF, POWO, IUCN Red List, FM
Angiosperms	Monocots	Araceae Juss.	Wolffiella	Species	Wolffiella welwitschii (Hegelm.) Monod	Wolffia conguensis Welw. ex Trimen, Wolffia welwitschii Hegelm., Wolffiopsis welwitschii (Hegelm.) Hartog & Plas		Herb	Aquatic											1		LC		Native			MP: Locality not known.	GBIF, POWO, IUCN Red List, FM
Angiosperms	Monocots	Araceae Juss.	Zamioculcas	Species	Zamioculcas zamiifolia (G.Lodd.) Engl.	Caladium zamiifolium G.Lodd., Zamioculcas lanceolata Peter, Zamioculcas loddigesii Schott		Herb		Perennial						1	1	1		1				Native			MC: Reserva Florestal de Moribane. S: GNP, Dondo. G: Bilene. MP: Ponta Malongane, I.Inhaca, Avenida Marginal, Zitundo	Müller et al. (2012), GBIF, POWO, FM, BNRH, K
Angiosperms	Monocots	Araceae Juss.	Zantedeschia	Species	Zantedeschia aethiopica (L.) Spreng.	Arodes aethiopicum (L.) Kuntze, Calla aethiopica L., Calla ambigua Salisb., Calla moschata Moench, Colocasia aethiopica (L.) Link, Pseudohomalomena pastoensis A.D.Hawkes, Richardia aethiopica (L.) Spreng., Richardia africana Kunth		Herb	Geophyte											1				Introduced			MP: Maputo.	POWO, APD, TPL, Da Silva et al. (2004), FM
Angiosperms	Monocots	Araceae Juss.	Zantedeschia	Species	Zantedeschia rehmannii Engl.	Richardia lehmannii N.E.Br. ex Krelage, Richardia rehmannii (Engl.) N.E.Br. ex Krelage, Zantedeschia stehmannii Sprenger		Herb		Perennial														Native			Locality not known.	GBIF, POWO, FM
Angiosperms	Eudicots	Araliaceae Juss.	Cussonia	Species	Cussonia arborea Hochst. ex A.Rich.	Cussonia barteri Seem., Cussonia delevoyi De Wild., Cussonia djalonensis A.Chev., Cussonia hamata Harms, Cussonia homblei De Wild., Cussonia kirkii Seem., Cussonia laciniata Harms, Cussonia longissima Hutch. & Dalziel, Cussonia nigerica Hutch., Cussonia tisserantii Aubrév. & Pellegr.		Tree			1	1	1	1	1	1	1					LC		Native	Copo-Copo (CD,macu); Cundudzi (MC); Mubwabwa (T); Mushenga (MC,sho); Nampuapua (NP); Nampuapua (Z); Napuapula (Z); Yeratephe (CD,macu); Yeratepho (CD,macu)	Medicine	S: Próximo do R. Búzi, GNP. MC: Mavita, CNR. NP: Ribáuè, Imala. T: Chicoa, Serra Songa, Ulongue. Z: Serra do Sidi, Serra Chiperone, Milange, Ile. CD: QNP, Mueda, Ancuabe, Namatuca. NI: Marrupa, Eráti, Mataca, Unango	Müller et al. (2012), Timberlake et al. (2009), Bayliss et al. (2010), GBIF, POWO, IUCN Red List, TPL, WFO, FM, FZ, Koning (1993), Krog et al. (2006), BNRH, Burrows et al. (2018), Wursten et al. (2017)
Angiosperms	Eudicots	Araliaceae Juss.	Cussonia	Species	Cussonia arenicola Strey			Shrub											1	1	NE			Native	Mahawuku (MP,rong); Mahuku (MP,rong)		I: Vilanculos á Mapinhane, Pomene. MP: I.Inhaca, Catembe, Salamanga	GBIF, POWO, TPL, WFO, FM, FZ, Darbyshire et al. (2019), Koning (1993), BNRH, Burrows et al. (2018)
Angiosperms	Eudicots	Araliaceae Juss.	Cussonia	Species	Cussonia spicata Thunb.	Cussonia boivinii Drake, Cussonia calophylla Miq., Cussonia kraussii Hochst., Cussonia quercifolia Colla, Cussonia triptera Colla		Tree					1	1	1	1			1	1				Native	Mubwabwa Wa Como (T); Muchenje (NP,sho); Mussenge (MC)		MP: I.Inhaca, Ponduini. I: Massinga. MC: Báruè, Serra Choa, Serra Mocuta, Mts Chimanimani. NP: Mecuburi, Serra Chinga. T: Entre Tete e Múngári. Z: Gúruè, Mt. Namuli, Mt. Mabu, Serra Morrumbala.	Müller et al. (2012), Timberlake et al. (2007), Timberlake et al. (2009), Bayliss et al. (2010), GBIF, POWO, TPL, WFO, FM, FZ, Koning (1993), Burrows et al. (2018), K, Wursten et al. (2017)
Angiosperms	Eudicots	Araliaceae Juss.	Cussonia	Species	Cussonia zimmermannii Harms			Tree			1		1		1				1			LC		Native	Capuapua (CD,macu); Momucupocupo (NI)		NP: Nacala, entre Itoculo e Netia, Mazua, Mogincual. Z: Caia. I: Entre Massinga e Vilanculos, Mavanza. CD: Pemba, Nhica do Rovuma.	GBIF, POWO, IUCN Red List, TPL, WFO, FM, FZ, Koning (1993), BNRH, Burrows et al. (2018), K
Angiosperms	Eudicots	Araliaceae Juss.	Cussonia	Species	Cussonia zuluensis Strey			Tree												1		LC		Native			MP: REM, Entre Catembe e Bela vista, Quinta da Pedra	GBIF, POWO, IUCN Red List, TPL, WFO, FM, FZ , Burrows et al. (2018)
Angiosperms	Eudicots	Araliaceae Juss.	Hydrocotyle	Species	Hydrocotyle bonariensis Comm. ex Lam.	Hydrocotyle bonariensis var. multiflora (Lam.) Don, Hydrocotyle bonariensis var. texana J.M. Coult. & Rose, Hydrocotyle multiflora Ruiz & Pav., Hydrocotyle polystachya var. quinqueradiata Thouars ex A. Rich., Hydrocotyle umbellata var. bonariensis (Comm. ex Lam.) Spreng., Hydrocotyle verticillata var. bonariensis (Lam.) Urb., Hydrocotyle yucatanensis Millsp.		Herb		Perennial				1				1	1	1				Introduced			T: Tete. I: Mulungo (Vilanculos), Inharrime (próx. Da Praia de Závora). G: Entre Xai-Xai e a praia, Manjacaze, Muchopes (próx. de Chicomo). MP: Cidade de Maputo, I. Inhaca, Marracuene, Benfica, Muntanhane.	FM, FZ, POWO, TPL, WFO, APD, JSTOR, GBIF, LMA, LMU, BNRH
Angiosperms	Eudicots	Araliaceae Juss.	Hydrocotyle	Species	Hydrocotyle mannii Hook.f.			Herb		Perennial						1						LC		Native			MC: Vale do R. Messambuzi (Mavita), Reserva Florestal de Moribane (Tava Marsh).	FM, FZ, POWO, TPL, WFO, APD, GBIF, IUCN Red List
Angiosperms	Eudicots	Araliaceae Juss.	Hydrocotyle	Species	Hydrocotyle sibthorpioides Lam.	Chondrocarpus sibthorpioides Sweet		Herb	Climber	Perennial						1				1		LC	Requiring to add Mozambique in the geographic range	Native			MC: Mudala, CNR (ao longo do caminho para o Mt. Binga acima da travessia do rio Nhamadzi). MP: Jardim Botânico Tunduru.	FM, FZ, POWO, IUCN Red List, TPL, WFO, APD, GBIF, LMA, K, Wursten et al. (2017)
Angiosperms	Eudicots	Araliaceae Juss.	Hydrocotyle	Species	Hydrocotyle verticillata Thunb.	Centella verticillata (Thunb.) Fourc., Hydrocotyle vulgaris var. communis Cham. & Schltdl., Hydrocotyle vulgaris var. verticillata (Thunb.) Pers.		Herb		Perennial									1	1				Native			I: Panda, Domo, Vale de Inhassoro. MP: Praia de Catembe.	FM, FZ, POWO, TPL, WFO, APD, GBIF
Angiosperms	Eudicots	Araliaceae Juss.	Polyscias	Species	Polyscias albersiana Harms	Polyscias albersii Engl., Sciadopanax albersianus (Harms) R.Vig.		Tree				1										EN	Requiring to add Mozambique in the geographic range	Native			NI: Amaramba, Serra Mitucué	POWO, IUCN Red List, TPL, WFO, FM, FZ
Angiosperms	Eudicots	Araliaceae Juss.	Polyscias	Species	Polyscias fulva (Hiern) Harms	Botryopanax fulvus (Hiern) Hutch., Panax ferrugineus Hiern, Panax fulvus Hiern, Panax nigericus A.Chev., Polyscias elliotii Harms, Polyscias ferruginea (Hiern) Harms, Polyscias malosana Harms, Polyscias polybotrya Harms, Polyscias preussii Harms, Sciadopanax elliotii (Harms) R.Vig., Sciadopanax ferrugineus (Hiern) R.Vig., Sciadopanax fulvus (Hiern) R.Vig., Sciadopanax malosanus (Harms) R.Vig., Sc…		Tree					1		1	1	1					LC		Native	Penembe (MC)		MC: Serra Zuira, Planalto Tsetsera, CNR, Báruè, Serra Chinga. S: Serra Gorongosa. NP: Ribáuè. Z: Gúruè, Mt. Namuli, Serra Chiperone.	Müller et al. (2012), Timberlake et al. (2007), Timberlake et al. (2009), GBIF, POWO, IUCN Red List, TPL, WFO, FM, FZ, Koning (1993), BNRH, Burrows et al. (2018)
Angiosperms	Eudicots	Araliaceae Juss.	Schefflera	Species	Schefflera goetzenii Harms	Schefflera adolfi-friderici Harms, Schefflera mildbraedii Harms, Schefflera sycidiifolia Lebrun		Tree							1	1	1							Native	Frumbiró (S); Furumbiri (S)		S: Serra Gorongosa (Mt. Gogógo). MC: Serra Chinga, Serra Choa. Z: Mt. Mabu.	Müller et al. (2012), Timberlake et al. (2007), Timberlake et al. (2009), POWO, TPL, WFO, FM, FZ, Koning (1993), BNRH, Burrows et al. (2018), K
Angiosperms	Eudicots	Araliaceae Juss.	Schefflera	Species	Schefflera umbellifera (Sond.) Baill.	Cussonia buchananii Harms, Cussonia chartacea Schinz, Cussonia umbellifera Sond., Neocussonia buchananii (Harms) Hutch., Neocussonia umbellifera (Sond.) Hutch., Schefflera umbellifera var. buchananii (Harms) Tennant		Tree							1	1	1			1		LC		Native	Chijumbo (MP,rong); Uquemaquemani (MP,rong)		MC: Mts Chimanimani, Serra Choa. S: Serra Gorongosa (Mt. Gogógo, Mt. Nhandore). Z: Gúruè, Mt. Namuli, Serra Chiperone. MP: Ponta Dobela.	Müller et al. (2012), Timberlake et al. (2009), Bayliss et al. (2010), GBIF, IUCN Red List, POWO, TPL, WFO, FM, FZ, Koning (1993), BNRH, Burrows et al. (2018), K, Wursten et al. (2017)
Gymnosperms		Araucariaceae Henkel & W.Hochst.	Agathis	Species	Agathis dammara (Lamb.) Poir.	Agathis alba (Rumph. ex Hassk.) Foxw., Agathis celebica (Koord.) Warb., Agathis hamii Meijer Drees, Agathis loranthifolia Salisb., Agathis orientalis (Lamb.) Mottet, Agathis philippensis Warb., Agathis pinus-dammara Poir., Agathis regia Warb., Dammara celebica Koord., Dammara loranthifolia Link, Dammara rumphii C.Presl, Abies dammara (Lamb.) Dum.Cours., Pinus dammara Lamb.		Tree												1				Introduced			MP: Jardim Tunduru.	POWO, TPL, WFO, LMA
Gymnosperms		Araucariaceae Henkel & W.Hochst.	Araucaria	Species	Araucaria angustifolia (Bertol.) Kuntze	Araucaria angustifolia var. alba Reitz, Araucaria angustifolia var. caiova Reitz, Araucaria angustifolia var. caiuva Mattos, Araucaria angustifolia f. catharinensis Mattos, Araucaria angustifolia var. dependens Mattos, Araucaria angustifolia var. indehiscens Mattos, Araucaria angustifolia var. monoica Reitz, Araucaria angustifolia var. nigra Reitz, Araucaria angustifolia var. sancti-josephi Reitz…		Tree								1	1							Introduced			S: Beira. MC: Penha Longa.	POWO, TPL, WFO, LMA
Gymnosperms		Araucariaceae Henkel & W.Hochst.	Araucaria	Species	Araucaria columnaris (G.Forst.) Hook.	Araucaria cookii R.Br. ex Endl., Araucaria intermedia R.Br. ex Vieill., Araucaria lavoixii Silba, Columbea excelsa (Lamb.) Spreng., Dombeya excelsa Lamb., Eutacta cookii Carrière, Eutacta excelsa (Lamb.) Link, Eutacta humilis Carrière, Eutacta minor Carrière, Eutassa columnaris (G.Forst.) de Laub., Cupressus columnaris G.Forst.		Tree												1				Introduced			MP: Ponta Vermelha, Jardim Tunduru.	POWO, TPL, WFO, LMA
Gymnosperms		Araucariaceae Henkel & W.Hochst.	Araucaria	Species	Araucaria heterophylla (Salisb.) Franco	Eutassa heterophylla Salisb., Abies columbaria (Dum.Cours.) Dum.Cours., Pinus columbaria Dum.Cours.		Tree												1				Introduced			MP: Jardim Tunduru.	POWO, TPL, WFO, LMA
Angiosperms	Monocots	Arecaceae Bercht. & J.Presl	Borassus	Species	Borassus aethiopum Mart.	Borassus aethiopum var. bagamojense Becc., Borassus aethiopum var. senegalense Becc., Borassus deleb Becc., Borassus flabellifer var. aethiopum (Mart.) Warb., Borassus sambiranensis Jum. & H.Perrier		Tree			1					1						LC		Native			MC: entre Dombe e Matarara de Lucite. CD: Rio Messalo	TPL, WFO, POWO, GBIF, FM, IUCN Red List, Burrows et al. (2018)
Angiosperms	Monocots	Arecaceae Bercht. & J.Presl	Caryota	Species	Caryota urens L.			Tree								1				1				Introduced			MC: Chimoio. MP: Maputo.	POWO, APD, TPL, Da Silva et al. (2004), FM
Angiosperms	Monocots	Arecaceae Bercht. & J.Presl	Cocos	Species	Cocos nucifera L.	Calappa nucifera (L.) Kuntze, Cocos indica Royle, Cocos mamillaris Blanco, Cocos nana Griff., Cocos nucifera var. synphyllica Becc., Diplothemium henryanum F.Br.		Tree			1		1		1		1	1	1	1				Native		Handicraft, Food	G: Massingir. MP. I. NP. CD. Z. S.	TPL, WFO, POWO, GBIF, FM, Bandeira et al. (2007), Burrows et al. (2018)
Angiosperms	Monocots	Arecaceae Bercht. & J.Presl	Elaeis	Species	Elaeis guineensis Jacq.	Elaeis dybowskii Hua, Elaeis guineensis var. albescens Becc., Elaeis guineensis f. androgyna A.Chev., Elaeis guineensis var. angulosa Becc., Elaeis guineensis f. caryolitica Becc., Elaeis guineensis var. ceredia A.Chev., Elaeis guineensis var. compressa Becc., Elaeis guineensis f. dioica A.Chev., Elaeis guineensis f. dura Becc., Elaeis guineensis f. fatua Becc., Elaeis guineensis var. gracilinux …		Tree									1					LC		Native			S: GNP (Cloud Pool, Muanza).	FM, POWO, IUCN Red List, Burrows et al. (2018)
Angiosperms	Monocots	Arecaceae Bercht. & J.Presl	Hyphaene	Species	Hyphaene compressa H.Wendl.	Chamaeriphes compressa (H.Wendl.) Kuntze, Hyphaene benadirensis Becc., Hyphaene incoje Furtado, Hyphaene kilvaensis (Becc.) Furtado, Hyphaene mangoides Becc., Hyphaene megacarpa Furtado, Hyphaene multiformis Becc., Hyphaene semiplaena (Becc.) Furtado		Tree			1				1		1	1	1			LC		Native			Z: Morrumbala. CD: Palma, Muecate para Imala, entre Quionga e praia da Macanga, Quiterajo. S. G. I.	TPL, WFO, POWO, GBIF, FM, IUCN Red List, BNRH, Burrows et al. (2018), K
Angiosperms	Monocots	Arecaceae Bercht. & J.Presl	Hyphaene	Species	Hyphaene coriacea Gaertn.	Chamaeriphes coriacea (Gaertn.) Kuntze, Chamaeriphes shatan (Bojer ex Dammer) Kuntze, Chamaeriphes turbinata (H.Wendl.) Kuntze, Corypha africana Lour., Hyphaene baronii Becc., Hyphaene beccariana Furtado, Hyphaene coriacea var. minor Drude, Hyphaene hildebrandtii Becc., Hyphaene natalensis Kuntze, Hyphaene oblonga Becc., Hyphaene parvula Becc., Hyphaene pileata Becc., Hyphaene pleuropoda Becc., H…		Tree			1				1		1	1	1			LC		Native	Muhukulo (X); Nala (G,tson)	Beliefs, Food, Handicraft	CD: Entre Quionga e Porto Amélia. Z: Maganja da Costa, Namacurra. I: Pomene. G: LNP, Massangena. S: Beira, Catapu.	TPL, WFO, POWO, GBIF, FM, IUCN Red List, Koning (1993), Bruschi et al. (2014), Bandeira et al. (2007), Santo-António and Goulão (2015), Burrows et al. (2018)
Angiosperms	Monocots	Arecaceae Bercht. & J.Presl	Hyphaene	Species	Hyphaene petersiana Klotzsch ex Mart.	Chamaeriphes benguelensis (Welw. ex H.Wendl.) Kuntze, Chamaeriphes ventricosa (J.Kirk) Kuntze, Hyphaene aurantiaca Dammer, Hyphaene benguelensis Welw. ex H.Wendl., Hyphaene goetzei Dammer, Hyphaene obovata Furtado, Hyphaene ovata Furtado, Hyphaene ventricosa J.Kirk		Tree					1				1	1				LC		Native			S: Entre Mambone e Buzi, Gorongosa. G: Manjacaze. NP: Nampula.	TPL, WFO, POWO, IUCN Red List, GBIF, FM, IUCN, Burrows et al. (2018), K
Angiosperms	Monocots	Arecaceae Bercht. & J.Presl	Hyphaene	Species	Hyphaene thebaica (L.) Mart.	Chamaeriphes crinita (Gaertn.) Kuntze, Chamaeriphes thebaica (L.) Kuntze, Corypha thebaica L., Cucifera thebaica (L.) Delile, Douma thebaica (L.) Poir., Hyphaene baikieana Furtado, Hyphaene crinita Gaertn., Hyphaene cuciphera Pers., Hyphaene dahomeensis Becc., Hyphaene dankaliensis Becc., Hyphaene nodularia Becc., Hyphaene occidentalis Becc., Hyphaene santoana Furtado, Hyphaene sinaitica Furtado,…		Tree						1				1	1			LC		Native			I: Massinga, Pomene. G: Chidenguele. T: Mutarara	TPL, WFO, POWO, GBIF, FM, IUCN Red List, LMA
Angiosperms	Monocots	Arecaceae Bercht. & J.Presl	Phoenix	Species	Phoenix reclinata Jacq.	Fulchironia senegalensis Lesch., Phoenix abyssinica Drude, Phoenix baoulensis A.Chev., Phoenix comorensis Becc., Phoenix djalonensis A.Chev., Phoenix dybowskii A.Chev., Phoenix equinoxialis Bojer, Phoenix leonensis Lodd. ex Kunth, Phoenix reclinata var. comorensis (Becc.) Jum. & H.Perrier, Phoenix reclinata var. madagascariensis Becc., Phoenix reclinata var. somalensis Becc., Phoenix spinosa Schu…		Tree			1		1	1	1		1	1	1	1		LC		Native	Candjiza (Z); Guindo (MP,tson); Kandjedza (T); -Kindu(MP,rong); Mkindo (MP,rong); Muchindo (MC,sho)	Food	MP: Tinonganine, Ponta de Ouro, I.Inhaca, Bela Vista, Zitundo. G: Chongoene, Manjacaze. I: Pomene, Mambone, Homoíne. S: GNP. NP: Serra Inago, Serra Ribáuè. Z: Morrumbala, Serra Chiperone, Gúruè, Serra Tumbine, Maganja da Costa. T: Angónia. CD: Palma, Porto Amélia	TPL, WFO, POWO, GBIF, FM, IUCN Red List, LMA, Koning (1993), Bruschi et al. (2014), Santo-António and Goulão (2015), Burrows et al. (2018), Wursten et al. (2017)
Angiosperms	Monocots	Arecaceae Bercht. & J.Presl	Raphia	Species	Raphia australis Oberm. & Strey			Tree										1		1	NE	VU		Native			G: Bilene (Lagoa Embache). MP: Chidenguele, Bobole, Marrucuene, Macandza (Manhiça).	TPL, WFO, POWO, GBIF, FM, LMA, Darbyshire et al. (2019), IUCN Red List, BNRH, Burrows et al. (2018), K
Angiosperms	Monocots	Arecaceae Bercht. & J.Presl	Raphia	Species	Raphia farinifera (Gaertn.) Hyl.	Metroxylon ruffia (Jacq.) Spreng., Raphia kirkii Engl. ex Becc., Raphia kirkii var. grandis Engl. ex Becc., Raphia kirkii var. longicarpa Engl. ex Becc., Raphia lyciosa Comm. ex Kunth, Raphia pedunculata P.Beauv., Raphia polymita Comm. ex Kunth, Raphia ruffia (Jacq.) Mart., Raphia tamatavensis Sadeb., Sagus farinifera Gaertn., Sagus pedunculata (P.Beauv.) Poir., Sagus ruffia Jacq.		Tree				1	1	1	1					1		LC		Native	Chiwale (T); Eliahe (NP,macu); Niverrès (NI,macu)		MP: Reserva Florestal de Licuáti. Z: Marrupa. NP: Monapo, Floresta de Sr. Wolf. T: Angónia, Ulongue. NI: REN, Matimbo Safari	TPL, WFO, POWO, GBIF, FM, IUCN Red List, LMA, Koning (1993), BNRH, Burrows et al. (2018), Wursten et al. (2017)
Angiosperms	Magnoliids	Aristolochiaceae Juss.	Aristolochia	Species	Aristolochia albida Duch.	Aristolochia aethiopica Welw., Aristolochia angulata Bojer ex Duch., Aristolochia aurita Duch., Aristolochia bainesii Burtt Davy, Aristolochia bernieri Duch., Aristolochia bongoensis Engl., Aristolochia densivenia Engl., Aristolochia dewevrei De Wild. & T.Durand, Aristolochia kirkii Baker, Aristolochia ledermannii Engl., Aristolochia multiflora Duch., Aristolochia petersiana Klotzsch		Herb	Climber	Perennial	1		1	1	1	1	1							Native		Medicine	S: Chiramba, Marromeu, Cheringoma, Inhamitanga, Chemba, GNP. Z: Morumbala, Mocuba, Megaza. T: Cahora Bassa, Furancungo, Mutarara, Songo, Baeie. NP: Nampula, Monapo, Reserva Florestal do Sr. Wolf, Imala. MC: Bandula, Garuso. CD: Mecúfi.	TPL, WFO, POWO, GBIF, FM, LMA, Conde et al. (2014)
Angiosperms	Magnoliids	Aristolochiaceae Juss.	Aristolochia	Species	Aristolochia littoralis Parodi	Aristolochia elegans Mast., Aristolochia elegans var. hassleriana (Chodat) Hassl., Aristolochia hassleriana Chodat		Liana											1	1				Introduced			I: Vilanculos. MP: Maputo.	TPL, WFO, POWO, GBIF, FM, LMA
Angiosperms	Magnoliids	Aristolochiaceae Juss.	Hydnora	Species	Hydnora abyssinica A.Br.	Hydnora aethiopica Decne., Hydnora angolensis Decne., Hydnora bogosensis Becc., Hydnora cornii Vaccaneo, Hydnora gigantea Chiov., Hydnora hanningtonii Rendle, Hydnora johannis Becc., Hydnora michaelis Peter, Hydnora ruspolii Chiov., Hydnora solmsiana Dinter		Herb	Parasitic	Perennial										1						Medicine	MP: Namaacha, Matutuíne, Marracuene, Boane, Manhiça.	POWO, Krog et al. (2006), Barbosa et al. (2020), Williams et al. (2011)
Angiosperms	Monocots	Asparagaceae Juss.	Agave	Species	Agave sisalana Perrine	Agave amaniensis Trel. & Nowell, Agave rigida var. sisalana (Perrine) Engelm., Agave segurae D.Guillot & P.Van der Meer, Agave sisalana f. armata (Trel.) Trel., Agave sisalana var. armata Trel.		Shrub	Succulent											1				Introduced	Shikwenga (MP,rong)	Cosmetic, Handicraft	MP: Entre Matola e o Umbelúzi, Zona entre Avenida Friedrich Engels e Avenida Marginal.	FM, FZ, POWO, TPL, WFO, APD, GBIF, LMA, LMU, Koning (1993), Bruschi et al. (2014), Bandeira et al. (2007)
Angiosperms	Monocots	Asparagaceae Juss.	Albuca	Species	Albuca abyssinica Jacq.	Albuca allenae Baker, Albuca angolensis Welw., Albuca asclepiadea Chiov., Albuca bainesii Baker, Albuca beguinotii Cufod., Albuca blepharophylla Cufod., Albuca capitata Gilli, Albuca chaetopoda Chiov., Albuca elwesii Regel, Albuca erlangeriana Engl., Albuca fibrillosa De Wild., Albuca fischeri Engl., Albuca fleckii Schinz, Albuca hysterantha Chiov., Albuca lugardii Baker, Albuca melleri (Baker) B…		Herb	Geophyte						1	1				1				Native	Munhacarumbane (S)	Medicine	Z: Gúruè, Namagoa. MC: Manica. MP: Mavalane, Na encosta da praia da Polana.	FM, FZ, POWO, TPL, WFO, APD, GBIF, LMA, LMU, Koning (1993), K, Wursten et al. (2017)
Angiosperms	Monocots	Asparagaceae Juss.	Albuca	Species	Albuca kirkii (Baker) Brenan	Albuca nyikensis Baker, Ornithogalum kirkii Baker		Shrub							1	1								Native			Z: Mocuba, Namagoa, Entre Mulevala e Mocubela. MC: Mts Chimanimani, Vila de Manica à Penhalonga.	FZ, POWO, TPL, WFO, APD, GBIF, LMA, LMU, K, Wursten et al. (2017)
Angiosperms	Monocots	Asparagaceae Juss.	Albuca	Species	Albuca schlechteri Baker	Ornithogalum schlechteri J.C.Manning & Goldblatt		Herb	Geophyte											1							MP: Baía de Maputo.	GBIF, POWO
Angiosperms	Monocots	Asparagaceae Juss.	Albuca	Species	Albuca seineri (Engl. & K.Krause) J.C.Manning & Goldblatt	Anthericum seineri (Engl. & K.Krause) Poelln., Battandiera seineri (Engl. & K.Krause) Mart.-Azorín, M.B.Crespo & Juan, Bulbine seineri Engl. & K.Krause, Ornithogalum filibracteatum Oberm., Ornithogalum seineri (Engl. & K.Krause) Oberm., Ornithogalum wilmaniae F.M.Leight.		Herb		Perennial										1				Native			MP: Locality not known.	POWO, TPL, WFO, FM
Angiosperms	Monocots	Asparagaceae Juss.	Albuca	Species	Albuca setosa Jacq.	Albuca baurii Baker, Albuca pachychlamys Baker, Albuca patersoniae Schönland, Ornithogalum setosum (Jacq.) J.C.Manning & Goldblatt		Herb		Perennial										1				Native			MP: Namaacha	POWO, TPL, WFO, FM
Angiosperms	Monocots	Asparagaceae Juss.	Albuca	Species	Albuca virens (Lindl.) J.C.Manning & Goldblatt	Ornithogalum virens Lindl., Stellarioides virens (Lindl.) Speta, Tomoxis virens (Lindl.) Raf.		Herb	Geophyte					1		1			1	1				Native	Chiogoua (I); Lidjadjati (MP); nyala Ya Nova (S)		T: Ulónguè. MC: CNR. I: Zavala. MP: Ilha de Inhaca, Namaacha (Mt. M'Ponduine), Marracuene à Bobole, Polana Cimento "A" (Rua de Sidano), REM.	FM, POWO, TPL, WFO, APD, GBIF, LMA, Koning (1993), Wursten et al. (2017)
Angiosperms	Monocots	Asparagaceae Juss.	Asparagus	Species	Asparagus aethiopicus L.	Asparagopsis aethiopica (L.) Kunth, Asparagopsis lancea (Thunb.) Kunth, Asparagus aculeatus Voss, Asparagus laetus Salisb., Asparagus lanceus Thunb., Asparagus maximus Voss, Asparagus sprengeri Regel, Protasparagus aethiopicus (L.) Oberm.		Shrub												1		LC		Native	Unkwangulatilo (MP)		MP: Ilha de Inhaca, Moamba à Chinhanguanine.	POWO, IUCN Red List, TPL, APD, GBIF, Koning (1993)
Angiosperms	Monocots	Asparagaceae Juss.	Asparagus	Variety	Asparagus africanus Lam. var. africanus	Asparagopsis juniperina Kunth, Asparagopsis schlechtendalii Kunth, Asparagopsis scoparia Kunth, Asparagus burkei Baker, Asparagus buruensis Engl., Asparagus cooperi Baker, Asparagus dependens Thunb., Asparagus dinteri Engl. & Krause, Asparagus fleckii Schinz, Asparagus francisci K.Krause, Asparagus irregularis Baker, Asparagus judtii Schinz, Asparagus mitis A.Rich., Asparagus multiflorus Baker, A…		Shrub			1	1	1	1	1	1	1	1	1	1				Native	Kwangwa La Tilo (G,tson); Tsitsindzucua (T,seng)	Beliefs, Cosmetic, Food, Handicraft, Medicine, Ornament	CD: Entre Mecúfi e a foz do R. Lúrio, Baía de Pemba (Brenda's Bush Camp), Mueda à Diaca, Montepuez, Entre Quissanga e Pemba. NI: Rio Rovuma à Unango, Cuamba à Marrupa. NP: Este de Lumbo, Memba - Geba. T: Songo à Tete, Changara à Cahora Bassa, Ulónguè (perto do rio Lifidzi). Z: Namacurra à Mocuba, Entre Conho e Mopeia, Morrumbala, Entre Milange e Mocuba. S: GNP, Gorongosa (Nhambita), EN1 à Buzi. M…	Timberlake et al. (2009), FM, FZ, POWO, APD, GBIF, LMA, LMU, Koning (1993), Bruschi et al. (2011), BNRH, Müller et al. (2012)
Angiosperms	Monocots	Asparagaceae Juss.	Asparagus	Variety	Asparagus africanus Lam. var. puberulus (Baker) Sebsebe	Asparagus conglomeratus Baker, Asparagus lugardii Baker, Asparagus pilosus Baker, Asparagus puberulus Baker, Asparagus pubescens Baker, Asparagus shirensis Baker, Protasparagus pilosus (Baker) Oberm.		Shrub						1		1	1	1		1				Native		Medicine	T: Moatize. S: Serra Gorongosa (Canda), GNP (Urema). MC: Mt. Espungabera, Gondola (Mupindanganga). G: Guijá à Mabalane, Barragem de Massingir. MP: Maele à Mapulanguene.	FM, FZ, POWO, TPL, WFO, APD, GBIF, LMA, LMU, Conde et al. (2014), Bruschi et al. (2014), BNRH
Angiosperms	Monocots	Asparagaceae Juss.	Asparagus	Species	Asparagus asiaticus L.	Asparagopsis willdenowii Kunth, Asparagus gracilis Salisb., Asparagus steudneri Schweinf. ex Engl., Protasparagus asiaticus (L.) Kamble		Shrub			1			1		1				1				Introduced			CD: Entre Mahate e Quissanga. T: Angónia (próximo da Mt. M'penhe, estrada para M'Langueni), Mutarara Nova. MC: Sussundenga. MP: Boane, I. Inhaca.	FM, FZ, POWO, Da Silva et al. (2004), TPL, WFO, APD, JSTOR, GBIF, LMA, LMU
Angiosperms	Monocots	Asparagaceae Juss.	Asparagus	Species	Asparagus asparagoides (L.) W.Wight	Asparagus kuisibensis Dinter, Asparagus medeoloides (L.f.) Thunb., Asparagus medeoloides var. angustifolius (Mill.) Baker, Asparagus medeoloides var. falciformis (Kunth) Baker, Dracaena medeoloides L.f., Elachanthera sewelliae F.Muell., Elide asparagoides (L.) Kerguélen, Luzuriaga sewelliae (F.Muell.) K.Krause, Medeola angustifolia Mill., Medeola asparagoides L., Medeola latifolia Salisb., Myrsip…		Herb		Perennial				1		1	1							Native			T: Mt. Domué. S: Serra Gorongosa (Vale Nhamassa). MC: Serra Zuira, Tsetsera.	Müller et al. (2012), FM, FZ, POWO, TPL, WFO, APD, GBIF, LMA, LMU, Wursten et al. (2017)
Angiosperms	Monocots	Asparagaceae Juss.	Asparagus	Species	Asparagus aspergillus Jessop	Protasparagus aspergillus (Jessop) Oberm.		Herb		Perennial			1		1					1				Native	Tsitsinzucua (T,seng)		NP: Nampula. Z: Mocuba. MP: Namaacha.	FM, FZ, POWO, TPL, WFO, APD, GBIF, LMA, LMU, Koning (1993), BNRH
Angiosperms	Monocots	Asparagaceae Juss.	Asparagus	Species	Asparagus buchananii Baker	Protasparagus buchananii (Baker) Oberm.		Shrub			1		1			1				1				Native			CD: Negomano, Ancuabe (Taratibu Conservation Area). NP: Nampula. MC: Entre Macequece e Bandula, Chimoio à Sussendenga. MP: Moamba, Namaacha, Fonte de Goba, Campsite Casa Lisa (Manacuene), Reserva Florestal de Licuáti.	FZ, POWO, TPL, WFO, APD, GBIF, LMA, LMU, BNRH
Angiosperms	Monocots	Asparagaceae Juss.	Asparagus	Species	Asparagus chimanimanensis Sebsebe			Shrub								1					NE	LC		Native			MC: Mts Chimanimani.	FM, FZ, POWO, TPL, WFO, APD, GBIF, LMA, LMU, Darbyshire et al. (2019), IUCN Red List, BNRH, K, Wursten et al. (2017)
Angiosperms	Monocots	Asparagaceae Juss.	Asparagus	Species	Asparagus densiflorus (Kunth) Jessop	Asparagopsis densiflora Kunth, Asparagus myriocladus Baker, Asparagus sarmentosus var. comatus Baker, Asparagus sarmentosus var. densiflorus (Kunth) Baker, Protasparagus densiflorus (Kunth) Oberm.		Shrub										1	1	1				Native			MP: Reserva Florestal de Licuáti, Zitundo, Catuane à Salamanga, I. Inhaca, Ilha dos Portugueses. I: Funhalouro à Mocoduene. G: Bilene à Macia.	FM, FZ, POWO, TPL, WFO, APD, GBIF, LMA, LMU, BNRH
Angiosperms	Monocots	Asparagaceae Juss.	Asparagus	Species	Asparagus devenishii (Oberm.) Fellingham & N.L.Mey.	Protasparagus devenishii Oberm.		Shrub								1								Native			MC: Tsetsera.	FZ, POWO, TPL, WFO, APD, GBIF, LMA, LMU, BNRH
Angiosperms	Monocots	Asparagaceae Juss.	Asparagus	Species	Asparagus divaricatus (Oberm.) Fellingham & N.L.Mey.	Protasparagus divaricatus Oberm.		Shrub												1				Native			MP: Catuane à Porto Henrique.	FZ, POWO, TPL, WFO, APD, GBIF, LMA, LMU, BNRH
Angiosperms	Monocots	Asparagaceae Juss.	Asparagus	Species	Asparagus edulis (Oberm.) J.-P.Lebrun & Stork	Protasparagus edulis Oberm		Shrub												1				Native			MP: Marracuene.	FZ, POWO, TPL, WFO, APD, GBIF, LMA, LMU, BNRH
Angiosperms	Monocots	Asparagaceae Juss.	Asparagus	Species	Asparagus exuvialis Burch.	Asparagus ecklonii Baker, Asparagus exuvialis f. ecklonii (Baker) Fellingham & N.L.Mey., Asparagus hereroensis Schinz, Protasparagus exuvialis (Burch.) Oberm., Protasparagus exuvialis f. ecklonii (Baker) Oberm.		Shrub										1						Native			G: Entre Mabalane e Caniçado.	FZ, POWO, TPL, WFO, APD, GBIF, LMA, LMU
Angiosperms	Monocots	Asparagaceae Juss.	Asparagus	Species	Asparagus falcatus L.	Protasparagus falcatus (L.) Oberm.		Shrub			1		1	1	1	1	1	1	1	1				Native	Cuangulatilo (G); Kwangulatilo (MP,rong); Muan-Mulupo (Z); Nititinaneba (Z); Rugui (X,sho); Unkwangulatilo (MP)	Medicine	CD: Dambo à Nhica do Rovuma, Palma à Quionga. NP: Angoche (praia de Matangula), Serra Ribáuè (Mepalué). T: Ulónguè. Z: Maganja da Costa, Entre Mocuba e Quelimane, Alto Ligonha. S: Savane, Mupa, Concessão Levasflor, Serra Gorongosa (Mt. Nhandore), Entre Muanza e Inhaminga, GNP (Urema; Cascatas de Morumbodzi; R. Mueredze; Desfildeiro do R. Nhamfisse "Zamambo"). MC: Mts Chimanimani, Dombe, Serra Cho…	Müller et al. (2012), FZ, POWO, TPL, WFO, APD, GBIF, LMA, LMU, Koning (1993), Bruschi et al. (2011), BNRH, K
Angiosperms	Monocots	Asparagaceae Juss.	Asparagus	Species	Asparagus flagellaris (Kunth) Baker	Asparagopsis flagellaris Kunth, Asparagus abyssinicus Hochst. ex A.Rich., Asparagus africanus var. abyssinicus (Hochst. ex A.Rich.) Fiori, Asparagus pauli-guilelmii Solms, Asparagus pauli-guilelmii var. daltonii Baker, Asparagus pauli-guilelmii var. katangensis De Wild. & T.Durand, Asparagus schweinfurthii Baker, Asparagus somalensis Chiov.		Shrub			1	1	1	1	1									Native			T: Angónia, Mualadze. Z: Alto Molócuè à Alto Ligonha. NP: Nacala. CD: Mueda-Montepuez, Palma-Quissanga, Quiterajo, Nhica do Rovuma. NI: Entre Massangulo e Lichinga.	FZ, POWO, TPL, WFO, APD, GBIF, LMA, LMU, BNRH, K
Angiosperms	Monocots	Asparagaceae Juss.	Asparagus	Species	Asparagus humilis Engl.	Protasparagus humilis (Engl.) B.Mathew		Herb		Perennial	1		1									EN		Native			NP: Praia Quissimajulo, Mossuril à Matibane. CD: Ilha de Fola, Ilha do Ibo.	FM, FZ, POWO, IUCN Red List, TPL, WFO, APD, JSTOR, GBIF, LMA, LMU, BNRH
Angiosperms	Monocots	Asparagaceae Juss.	Asparagus	Species	Asparagus krebsianus (Kunth) Jessop			Shrub					1	1	1									Native			Z: Montes Ile, Mt. Tumbine, Mt. Namuli. NP: Cidade de Nampula. T: Mt. Zóbuè	FZ, POWO, TPL, WFO, APD, GBIF, LMA, LMU
Angiosperms	Monocots	Asparagaceae Juss.	Asparagus	Species	Asparagus laricinus Burch.	Asparagus angolensis Baker, Asparagus laricinus var. katangensis De Wild. & T.Durand, Protasparagus laricinus (Burch.) Oberm.		Shrub				1		1		1								Native	Tsitsindzucua (T,seng)		NI: Majune (margens do rio Ligúri). MC: Mossurize, Espungabera, Serra Choa, Tsetsera. T: Ulónguè	Müller et al. (2012), FZ, POWO, TPL, WFO, APD, GBIF, LMA, LMU, Koning (1993), BNRH
Angiosperms	Monocots	Asparagaceae Juss.	Asparagus	Species	Asparagus longicladus N.E.Br.	Protasparagus longicladus (N.E.Br.) B.Mathew		Shrub						1										Native			T: Changara.	FZ, POWO, TPL, WFO, APD, GBIF, LMA, LMU
Angiosperms	Monocots	Asparagaceae Juss.	Asparagus	Species	Asparagus lynetteae (Oberm.) Fellingham & N.L.Mey.	Protasparagus lynetteae Oberm.		Herb		Perennial										1	NE			Native			MP: Entre Moamba e Magude, Catuane à Porto Henrique.	FM, POWO, TPL, LMA, APD, BNRH
Angiosperms	Monocots	Asparagaceae Juss.	Asparagus	Species	Asparagus macowanii Baker	Asparagus zuluensis N.E.Br., Protasparagus macowanii (Baker) Oberm.		Shrub												1		LC		Native			MP: Fonte de Goba, Namaacha.	FM, FZ, POWO, IUCN Red List, TPL, WFO, APD, JSTOR, GBIF, LMA, LMU
Angiosperms	Monocots	Asparagaceae Juss.	Asparagus	Species	Asparagus migeodii Sebsebe			Herb		Perennial					1		1							Native			Z: Mocuba à Milange. S: Cheringoma (área de Inhaminga, desfiladeiro do rio Mazamba).	FM, FZ, POWO, TPL, WFO, APD, GBIF, LMA, LMU, BNRH
Angiosperms	Monocots	Asparagaceae Juss.	Asparagus	Species	Asparagus minutiflorus (Kunth) Baker	Asparagopsis minutiflora Kunth, Protasparagus minutiflorus (Kunth) Oberm.		Shrub												1				Native			MP: Mts Libombos (nas encostas orientais inferiores), Catuane, Baía de Maputo.	FZ, POWO, TPL, WFO, APD, GBIF, LMA, LMU, BNRH
Angiosperms	Monocots	Asparagaceae Juss.	Asparagus	Species	Asparagus mozambicus Kunth			Herb		Perennial	1													Native			CD: Ilha das Quirimbas.	FM, FZ, POWO, TPL, WFO, APD, GBIF, LMA, LMU
Angiosperms	Monocots	Asparagaceae Juss.	Asparagus	Species	Asparagus natalensis (Baker) J.-P.Lebrun & Stork	Asparagus aethiopicus var. natalensis Baker, Protasparagus natalensis (Baker) Oberm.		Herb	Climber	Perennial								1	1	1				Native			I: Pomene, PNR. G: Bilene, "Limpopo Camp" (entre Chókwè e a Barragem de Massingir). MP: Polana, Moamba, Costo do Sol, Marracuene (Jay's Lodge), Reserva Florestal de Licuáti, Ponta Techobanine (Zitundo).	FM, FZ, POWO, TPL, WFO, APD, GBIF, LMA, LMU, BNRH
Angiosperms	Monocots	Asparagaceae Juss.	Asparagus	Species	Asparagus nelsii Schinz	Protasparagus nelsii (Schinz) Oberm.		Shrub								1	1	1	1					Native			S: 3 km da EN1 na estrada de Machanga. MC: Entre Guro e Changara. I: Tomé à Funhalouro. G: Mapai à Pafúri.	POWO, BNRH
Angiosperms	Monocots	Asparagaceae Juss.	Asparagus	Species	Asparagus nodulosus (Oberm.) J.-P.Lebrun & Stork	Asparagus nodulosus Oberm.		Shrub										1						Native			G: LNP (na estrada de Massingir à Gaza Safari Camp, em Macandezulo), Pafúri-Mapai.	POWO, BNRH
Angiosperms	Monocots	Asparagaceae Juss.	Asparagus	Species	Asparagus pendulus (Oberm.) J.-P.Lebrun & Stork	Asparagus pendulus Oberm.		Herb		Perennial							1			1				Native			MP: Boane. S: Machanga.	FM, FZ, POWO, TPL, WFO, APD, GBIF, LMA, LMU, BNRH
Angiosperms	Monocots	Asparagaceae Juss.	Asparagus	Species	Asparagus petersianus Kunth			Shrub			1		1		1		1		1		NE			Native			Z: Entre Namacurra e Mocuba, Mocuba à Milange, baixa do R. Zambeze. S: Nhago Camp (Coutada 12), GNP, Entre Chupanga e Inhaminga, Catapu, Beira, Entre Muanza e Inhaminga, Zangue, Machanga. CD: Quissenge (Lule), Muncuto, R. Rovuma, Quiterajo, Palma, Ilha de Fola, Taratibu Bush Camp. I: Floresta de Areia ao longo do Rio Save, Inhassoro. NP: Nacala.	FM, FZ, POWO, TPL, WFO, APD, GBIF, LMA, LMU, Darbyshire et al. (2019), BNRH, K
Angiosperms	Monocots	Asparagaceae Juss.	Asparagus	Species	Asparagus psilurus Welw. ex Baker	Asparagus bechuanicus Baker, Protasparagus bechuanicus (Baker) Oberm.		Shrub								1								Native			MC: Gondola para o Búzi (Grudja).	FZ, POWO, TPL, WFO, APD, GBIF, LMA, LMU
Angiosperms	Monocots	Asparagaceae Juss.	Asparagus	Species	Asparagus racemosus Willd.	Asparagopsis abyssinica Kunth, Asparagopsis acerosa Kunth, Asparagopsis brownei Kunth, Asparagopsis decaisnei Kunth, Asparagopsis hohenackeri Kunth, Asparagopsis javanica Kunth, Asparagopsis retrofracta Schweinf. ex Baker, Asparagopsis subquadrangularis Kunth, Asparagus dubius Decne., Asparagus jacquemontii Baker, Asparagus penduliflorus Zipp. ex Span., Asparagus petitianus A.Rich., Asparagus rac…		Shrub				1	1	1	1	1	1		1					Native			NI: Serra Jéci, Marrupa à Mecula. NP: Mossuril à Matibane. T: Rio Nhimbe. Z: Entre Mocuba e Milange. S: Mpingwe Camp, Concessão Catapu), Canganetole, Estrada para a serração Levasflor (entre Inhaminga e Muanza), Margem norte na foz do Canal do Luabo (delta do Zambeze), Serra Gorongosa, GNP (desfiladeiro do Rio Nhamfisse "Nhagutua" ou "Zamamba"), Machanga. I: Inhassoro (perto de Macovane). MC: Mts…	FZ, POWO, TPL, WFO, APD, GBIF, LMA, LMU, BNRH
Angiosperms	Monocots	Asparagaceae Juss.	Asparagus	Species	Asparagus radiatus Sebsebe			Shrub												1	NE			Native			MP: Goba.	FM, FZ, POWO, TPL, WFO, APD, GBIF, LMA, LMU, Darbyshire et al. (2019), K
Angiosperms	Monocots	Asparagaceae Juss.	Asparagus	Species	Asparagus saundersiae Baker			Shrub				1		1										Native			NI: Entre Massangulo e Lichinga, Entre a Ponte sobre o Rio Lugenda e Marrupa. T: Angónia ('The TobaccoRoad', norte de Furancungo).	POWO, BNRH
Angiosperms	Monocots	Asparagaceae Juss.	Asparagus	Species	Asparagus schroederi Engl.	Asparagus obermeyerae Jessop, Asparagus striatus De Wild., Asparagus wildemanii Weim., Protasparagus schroederi (Engl.) Oberm.		Shrub					1	1										Native			NP: Ribáuè (morro Matamane). T: Ulónguè.	FZ, POWO, TPL, WFO, APD, GBIF, LMA, LMU
Angiosperms	Monocots	Asparagaceae Juss.	Asparagus	Species	Asparagus setaceus (Kunth) Jessop	Asparagopsis setacea Kunth, Asparagus asiaticus var. amharicus Pic.Serm., Asparagus lujae De Wild., Asparagus plumosus Baker, Asparagus plumosus var. tenuissimus auct., Asparagus zanzibaricus Baker, Protasparagus plumosus (Baker) Oberm., Protasparagus setaceus (Kunth) Oberm.		Shrub			1	1	1		1	1	1	1	1	1				Native	Cangulatilo (MP,rong); Kwangulatilo (MP,rong); Inhacatze (MC); Inxileyamwali (NP,macu)	Medicine	CD: 5,3 km a sul de Mocímboa da Rovuma / Ngapa, Chipembe, Mueda. NI: Serra Jéci (próx. de Malulo). NP: Meconta, Corrane à Muatua, Mavili I Z: Entre Namacurra e Mocuba, Serra Macua, Mt. Mabu, Mt. Namuli, Mt. Morrumbala, Milange, Serra Tumbine, Gúruè (Rio Malema, Marope), Serra Chiperone. S: Serra Choa, Dondo-Inhaminga, Cheringoma (Concessão Swanepoel), Serra Gorongosa (Nhancuco), GNP (Desfiladeiro…	Müller et al. (2012), FZ, POWO, TPL, WFO, APD, GBIF, LMA, LMU, Koning (1993), Bruschi et al. (2011), BNRH, K, Wursten et al. (2017)
Angiosperms	Monocots	Asparagaceae Juss.	Asparagus	Species	Asparagus suaveolens Burch.	Asparagopsis spinescens Kunth, Asparagopsis suaveolens (Burch.) Baker, Asparagopsis triacantha Kunth, Asparagopsis zeyheri Kunth, Asparagus intangibilis Dinter, Asparagus omahekensis K.Krause, Asparagus spinosissimus Kuntze, Asparagus stipulaceus var. spinescens (Kunth) Baker, Protasparagus suaveolens (Burch.) Oberm.		Shrub										1	1					Native			I: Mapinhane à Mabote. G: Massingir, LNP (Tseka Pan, entre Macandezulo e a entrada norte, próx. de Mapai).	FZ, POWO, TPL, WFO, APD, GBIF, LMA, LMU, BNRH
Angiosperms	Monocots	Asparagaceae Juss.	Asparagus	Species	Asparagus virgatus Baker	Asparagus virgatus var. capillaris Baker, Protasparagus virgatus (Baker) Oberm.		Shrub							1	1		1		1				Native			Z: Serra Chiperone. MC: Hacufera (Algueirão) à Machaze/Chitobe (entre os rios Save e Búzi), Sussundenga, Gondola, Mabongo, Chimoio-Mavita (ao km 7 da Ponte sobre o Rio Munhinga). G: Norte de Bilene à Foz do Rio Limpopo, Bilene (próx. a praia), Limpopo Camp (entre Chókwè e Barragem de Massingir). MP: Ponta Malongane, Goba, Fonte dos Libombos, Inkwazi Nature Reserve (Zitundo).	Müller et al. (2012), Timberlake et al. (2009), FZ, POWO, TPL, WFO, APD, GBIF, LMA, LMU, BNRH, Wursten et al. (2017)
Angiosperms	Monocots	Asparagaceae Juss.	Behnia	Species	Behnia reticulata (Thunb.) Didr.	Dictyopsis thunbergii Harv., Hylonome reticulata (Thunb.) Webb & Berthel., Ruscus reticulatus Thunb.		Herb	Climber	Perennial					1	1								Native			Z: Serra Chiperone, Mt. Mabu, Mt. Namuli. MC: Mt. Espungabera, Quedas do Messambuzi, Mts Chimanimani (Desfiladeiro de Mussapa).	Müller et al. (2012), Timberlake et al. (2007), Timberlake et al. (2009), FM, FZ, POWO, TPL, WFO, APD, GBIF, LMA, LMU, Wursten et al. (2017)
Angiosperms	Monocots	Asparagaceae Juss.	Bowiea	Species	Bowiea volubilis Harv. ex Hook.f.	Ophiobostryx volubilis (Harv.) Skeels, Schizobasopsis volubilis (Harv.) J.F.Macbr.		Herb	Geophyte							1								Native			MC: Serra Chindaza.	FM, FZ, POWO, TPL, WFO, APD, GBIF, LMA, LMU
Angiosperms	Monocots	Asparagaceae Juss.	Chlorophytum	Variety	Chlorophytum africanum (Baker) Baker var. silvaticum (Dammer) Meerts	Chlorophytum bakeri Poelln., Chlorophytum comatum Poelln., Chlorophytum inexpectatum Poelln., Chlorophytum papilliferum Poelln., Chlorophytum pergracile Poelln., Chlorophytum robustum Poelln., Chlorophytum silvaticum Dammer, Dasystachys debilis Baker, Dasystachys gracilis Baker		Herb		Perennial		1												Native			NI: Locality not known.	FM, POWO, TPL, APD
Angiosperms	Monocots	Asparagaceae Juss.	Chlorophytum	Species	Chlorophytum andongense Baker	Anthericum andongense Baker, Anthericum gossweileri Poelln., Chlorophytum longipes Baker, Chlorophytum pedunculosum Peter ex Poelln., Chlorophytum viridescens var. majus Poelln.		Herb		Perennial						1								Native			MC: Vandúzi.	FM, FZ, POWO, TPL, WFO, APD, GBIF, LMA, LMU
Angiosperms	Monocots	Asparagaceae Juss.	Chlorophytum	Species	Chlorophytum blepharophyllum Schweinf. ex Baker			Herb		Perennial	1	1		1	1	1	1							Native			CD: Nhica do Rovuma. NI: Lichinga. T: N'Tchide (Domué). Z: Mt. Morrumbala. S: Margens do R. Mocumbeze. MC: Serra Mocuta, Matindire, Amatongas, Chimoio, Mts Chimanimani.	FM, FZ, POWO, TPL, WFO, APD, GBIF, LMA, LMU, K, Wursten et al. (2017)
Angiosperms	Monocots	Asparagaceae Juss.	Chlorophytum	Species	Chlorophytum bowkeri Baker	Chlorophytum magnificum Weim., Chlorophytum nigricans Baker, Chlorophytum perlongibracteatum Poelln., Chlorophytum stamineum Zahlbr., Chlorophytum strictum Baker, Chlorophytum wilmsii Engl. & K.Krause		Herb		Perennial						1	1							Native			S. MC.	FM, POWO, TPL, WFO, APD
Angiosperms	Monocots	Asparagaceae Juss.	Chlorophytum	Species	Chlorophytum brachystachyum Baker	Chlorophytum trachycarpum Oberm.		Herb		Perennial				1			1							Native			T: Ulónguè. S: Codzo (Cheringoma).	FM, FZ, POWO, TPL, WFO, APD, GBIF, LMA, LMU
Angiosperms	Monocots	Asparagaceae Juss.	Chlorophytum	Species	Chlorophytum calyptrocarpum (Baker) S.Kativu	Anthericum caespitosum Dinter, Anthericum calyptrocarpum Baker, Anthericum curvifolium K.Krause, Anthericum tenellum Welw. ex Baker		Herb		Perennial									1					Native			I: Govuro (Lago Papa).	FM, FZ, POWO, TPL, WFO, APD, GBIF, LMA, LMU
Angiosperms	Monocots	Asparagaceae Juss.	Chlorophytum	Variety	Chlorophytum cameronii (Baker) Kativu var. purpuratum (Rendle) Govaerts	Anthericum buchananii Baker, Anthericum giryamae Rendle, Anthericum korrowalense Engl. & K.Krause, Anthericum kyimbilense Poelln., Anthericum liliagastrum Engl. & Gilg, Anthericum pterocaulon Welw. ex Baker, Anthericum purpuratum Rendle, Anthericum purpuratum var. longipedicellatum Poelln., Anthericum rubellum Baker, Anthericum speciosum Rendle, Anthericum zanguebaricum Baker, Chlorophytum calate…		Herb		Perennial					1	1	1			1				Native			Z: Morrumbala à Quelimane. S: Cheringoma (margens do R. Mucombeze). MC: Gondola (margens do R. Nhamissenguere). MP: Mt. M'Ponduine.	FM, FZ, POWO, TPL, WFO, APD, GBIF, LMA, LMU
Angiosperms	Monocots	Asparagaceae Juss.	Chlorophytum	Species	Chlorophytum colubrinum (Baker) Engl.	Anthericum pleiostachyum Welw. ex Baker, Campylandra dasystachys Welw. ex Baker, Chlorophytum campanulatum (Baker) Engl., Chlorophytum crassifolium (Baker) Poelln., Chlorophytum decoratum (Baker) Marais & Reilly, Chlorophytum dolichostachys Engl. & Gilg, Chlorophytum engleri (Baker) Poelln., Chlorophytum maculatum Dammer, Chlorophytum nguluense Poelln., Chlorophytum pleiostachyum (Baker) T.Durand…		Herb		Perennial		1			1									Native			NI: Marrupa à Nungo (Mt. Kuwanku), Marrupa à Lichinga. Z: Serra Chiperone.	FM, POWO, TPL, WFO, APD, GBIF, LMA, LMU
Angiosperms	Monocots	Asparagaceae Juss.	Chlorophytum	Species	Chlorophytum comosum (Thunb.) Jacques	Anthericum vallis-trappii Poelln., Chlorophytum brevipes Baker, Chlorophytum bukobense Engl., Chlorophytum burchellii Baker, Chlorophytum delagoense Baker, Chlorophytum elatulum Poelln., Chlorophytum elgonense Bullock, Chlorophytum gazense Rendle, Chlorophytum glaucidulum Engl. ex Poelln., Chlorophytum inopinum Poelln., Chlorophytum kirkii Baker, Chlorophytum limurense Rendle, Chlorophytum longum…		Herb		Perennial	1			1	1	1	1			1				Native			CD: Baía de Pemba. T: Norte da Serra Domué. Z: Mt. Namuli. S: Serra Gorongosa. MC: Serra Espungabera. MP: Baía de Maputo, Marracuene.	FM, FZ, POWO, TPL, WFO, APD, GBIF
Angiosperms	Monocots	Asparagaceae Juss.	Chlorophytum	Species	Chlorophytum fasciculatum (Baker) Kativu	Anthericum conrathii Baker, Anthericum fasciculatum Baker, Anthericum hereroense Schinz, Anthericum lydenburgense Poelln., Anthericum subulatum Baker, Anthericum subulatum var. longibracteatum Poelln., Anthericum wilmsii Diels ex Poelln.		Herb		Perennial										1				Native			MP: Locality not known.	FM, POWO, TPL, APD
Angiosperms	Monocots	Asparagaceae Juss.	Chlorophytum	Species	Chlorophytum gallabatense Schweinf. ex Baker	Chlorophytum bequaertii De Wild., Chlorophytum breviflorum De Wild., Chlorophytum elachystanthum Cufod., Chlorophytum ginirense Dammer, Chlorophytum hockii De Wild., Chlorophytum longiramum Peter ex Poelln., Chlorophytum longistylum Poelln., Chlorophytum polyscapum Peter ex Poelln., Chlorophytum ramulosum De Wild., Chlorophytum riparium Poelln., Chlorophytum rivae Engl., Chlorophytum socialis Poe…		Herb		Perennial			1			1								Native			NP: Reserva Florestal do Sr. Wolf. (Monapo). MC: Machango (Dombe).	FM, FZ, POWO, TPL, WFO, APD, GBIF, LMA, LMU
Angiosperms	Monocots	Asparagaceae Juss.	Chlorophytum	Variety	Chlorophytum galpinii (Baker) Kativu var. galpinii	Anthericum bakerianum Poelln., Anthericum delagoense Poelln., Anthericum divaricatum Baker ex Schinz, Anthericum exellii Poelln., Anthericum junodii Baker ex Schinz, Anthericum rehmannii Baker		Herb		Perennial					1	1	1	1		1				Native			Z: Campo (Mopeia). S: S: Muanza à Dondo. MC: Mts Chimanimani, CNR, Tsetsera. G: Chókwè (Nwachicoluane à Massavasse). MP: Entre Mahotas e Costa do Sol, Zitundo (margens do R. Cele), Namaacha, Entre Bela Vista e Salamanga.	FM, FZ, POWO, APD, GBIF, LMA
Angiosperms	Monocots	Asparagaceae Juss.	Chlorophytum	Variety	Chlorophytum galpinii (Baker) Kativu var. matabelense (Baker) S.Kativu	Anthericum galpinii var. matabelense (Baker) Oberm., Anthericum kapiriense De Wild., Anthericum matabelense Baker, Anthericum patulum Baker, Anthericum volkii Sölch		Herb		Perennial									1	1				Native			I: Inharrime à Jacobécua. MP: Namaacha (nos montes e Cascata), Enchisa (Catuane à Goba), Entre Boane e Moamba.	POWO, TPL, WFO, APD, GBIF, LMA, LMU
Angiosperms	Monocots	Asparagaceae Juss.	Chlorophytum	Species	Chlorophytum krookianum Zahlbr.	Anthericum magnificum Poelln., Chlorophytum longipedunculatum H.M.L.Forbes, Chlorophytum longipedunculatum J. Forbes, Chlorophytum schlechterianum Poelln.		Herb		Perennial										1				Native			MP: Namaacha (margem esquerda do R. Movene, Mt. M'Ponduíne).	FM, FZ, POWO, TPL, WFO, APD, GBIF, LMA, LMU
Angiosperms	Monocots	Asparagaceae Juss.	Chlorophytum	Species	Chlorophytum longifolium Schweinf. ex Baker	Anthericum drimiopsis Baker, Anthericum falcatum Welw. ex Baker, Anthericum lunatum Poelln., Chlorophytum dolomiticum Dinter, Chlorophytum drimiopsis (Baker) Poelln., Chlorophytum papillosum Rendle, Chlorophytum pleiophyllum Peter ex Poelln., Chlorophytum poricolum Poelln., Chlorophytum welwitschii Poelln., Dasystachys drimiopsis (Baker) Benth., Dasystachys falcata Baker, Dasystachys papillosa (R…		Herb		Perennial						1								Native			MC: Tambara à Mts Nhamalongo	FM, FZ, POWO, TPL, WFO, APD, GBIF, LMA, LMU
Angiosperms	Monocots	Asparagaceae Juss.	Chlorophytum	Species	Chlorophytum macrophyllum (A.Rich.) Asch.	Anthericum macrophyllum A.Rich., Chlorophytum fuchsianum De Wild., Chlorophytum hyacinthinum Peter ex Poelln., Chlorophytum kilimandscharicum Poelln., Chlorophytum kyimbilense Poelln., Chlorophytum leucolepis Welw. ex Baker, Chlorophytum longipaniculatum Poelln., Chlorophytum macrophyllum var. kyimbilense Poelln., Chlorophytum massaicum K.Krause, Chlorophytum melanocarpum (Chiov.) Marais & Reilly…		Herb		Perennial					1	1								Native			Z: Namagoa, M'bobo (Morrumbala). MC: Dombe (Mt. Chiancanhi).	FM, FZ, POWO, TPL, WFO, APD, GBIF, LMA, LMU
Angiosperms	Monocots	Asparagaceae Juss.	Chlorophytum	Species	Chlorophytum macrosporum Baker	Chlorophytum rhodesianum E.Phillips		Herb		Perennial			1			1								Native			NP: Serra Mesa. MC: Munhinga, Chimoio (rochedos de Belas).	FM, FZ, POWO, TPL, WFO, APD, GBIF, LMA, LMU
Angiosperms	Monocots	Asparagaceae Juss.	Chlorophytum	Species	Chlorophytum nidulans (Baker) Brenan	Anthericum nidulans Baker, Chlorophytum asphodeloides C.H.Wright		Herb		Perennial				1										Native			T: Mt. Zóbuè.	FM, FZ, POWO, TPL, WFO, APD, GBIF, LMA, LMU
Angiosperms	Monocots	Asparagaceae Juss.	Chlorophytum	Species	Chlorophytum nubicum (Baker) Kativu	Anthericum articulatum Hutch., Anthericum fibrosum Hutch., Anthericum nubicum Baker, Anthericum senussiorum Poelln., Chlorophytum pleurostachyum Chiov. ex Chiarugi, Chlorophytum tinneae Baker		Herb		Perennial					1									Native			Z: Maruro (Mopeia).	FM, FZ, POWO, TPL, WFO, APD, GBIF, LMA, LMU
Angiosperms	Monocots	Asparagaceae Juss.	Chlorophytum	Species	Chlorophytum nyasae (Rendle) Kativu	Anthericum nyasae Rendle, Chlorophytum glabriflorum C.H.Wright		Herb		Perennial					1												Z: Milange (Mt. Tumbine).	POWO, TPL, WFO, APD, LMA
Angiosperms	Monocots	Asparagaceae Juss.	Chlorophytum	Species	Chlorophytum paucinervatum (Poelln.) Nordal	Anthericum paucinervatum Poelln.		Herb		Perennial					1									Native			Z: Mt. Namuli.	Timberlake et al. (2009), FM, FZ, POWO, TPL, WFO, APD, GBIF, LMA, LMU
Angiosperms	Monocots	Asparagaceae Juss.	Chlorophytum	Species	Chlorophytum polystachys Baker	Anthericum giganteum Poelln., Chlorophytum acrothyrsum Peter ex Poelln., Chlorophytum asparagifolium Engl., Chlorophytum holotrichum Peter ex Poelln., Chlorophytum palustre Engl. & K.Krause, Chlorophytum subrugosum Poelln., Chlorophytum tuberigenum Peter ex Poelln.		Herb		Perennial						1		1									G: Massingir (próx. da fronteira com Parque Nacional Kruger). MC: Serra Mocuta.	POWO, TPL, WFO, APD, GBIF
Angiosperms	Monocots	Asparagaceae Juss.	Chlorophytum	Species	Chlorophytum pubiflorum Baker	Chlorophytum paniculosum Peter ex Poelln.		Herb		Perennial					1	1	1							Native			Z: Namagoa, Delta do Zambeze. S: Nhambita (Gorongosa), Muanza (Mueredzi, GNP). MC: Serra Garuso.	FM, FZ, POWO, TPL, WFO, APD, GBIF, LMA, LMU
Angiosperms	Monocots	Asparagaceae Juss.	Chlorophytum	Subspecies	Chlorophytum pygmaeum (Weim.) Kativu subsp. rhodesianum (Rendle) Kativu	Anthericum rhodesianum Rendle		Herb	Geophyte							1					NE			Native			MC: Mts Chimanimani.	FM, FZ, POWO, TPL, WFO, APD, GBIF, LMA, LMU, Darbyshire et al. (2019), K, Wursten et al. (2017)
Angiosperms	Monocots	Asparagaceae Juss.	Chlorophytum	Species	Chlorophytum recurvifolium (Baker) C.Archer & S.Kativu	Anthericum longistylum Baker, Anthericum polyphyllum Baker, Anthericum recurvifolium Baker, Chlorophytum longiphyllum Govaerts, Chlorophytum polyphyllum (Baker) Kativu		Herb		Perennial										1		LC		Native			MP: Locality not known.	FM, POWO, TPL, APD, IUCN Red List
Angiosperms	Monocots	Asparagaceae Juss.	Chlorophytum	Species	Chlorophytum rubribracteatum (De Wild.) Kativu	Anthericum roseum Poelln., Anthericum rubribracteatum De Wild.		Herb		Perennial		1												Native			NI: Locality not known.	FM, POWO, TPL, APD
Angiosperms	Monocots	Asparagaceae Juss.	Chlorophytum	Variety	Chlorophytum sphacelatum (Baker) Kativu var. sphacelatum	Anthericum friesii Weim., Anthericum hockii De Wild., Anthericum homblei De Wild., Anthericum lukiense De Wild., Anthericum milanjianum Rendle, Anthericum robustulum Poelln., Anthericum usseramense Baker, Anthericum velutinum De Wild., Anthericum whytei Baker, Chlorophytum sphacelatum var. hockii (De Wild.) Nordal, Chlorophytum sphacelatum subsp. hockii (De Wild.) Kativu, Chlorophytum sphacelatum…		Herb	Rhizomatous						1	1	1							Native			Z: Namagoa, Mt. Namuli. S: Cheringoma (Mpawe, Coutada 12). MC: Amatongas.	FM, FZ, POWO, APD, GBIF, LMA, Timberlake et al. (2009)
Angiosperms	Monocots	Asparagaceae Juss.	Chlorophytum	Variety	Chlorophytum stenopetalum Baker var. stenopetalum	Chlorophytum bracteosum Welw. ex Baker, Chlorophytum cinerascens Engl. & K.Krause, Chlorophytum inarticulatum Poelln., Chlorophytum menyharthii Schinz ex Baker, Chlorophytum schweinfurthii Baker		Herb	Geophyte					1										Native			T: Boroma.	FM, FZ, POWO, TPL, GBIF
Angiosperms	Monocots	Asparagaceae Juss.	Chlorophytum	Species	Chlorophytum stolzii (K.Krause) Weim.	Acrospira asphodeloides Welw. ex Baker, Albuca stolzii K.Krause, Anthericum burgeri Cufod., Anthericum foliatum Poelln., Anthericum russissiense Poelln., Anthericum welwitschii Marais & Reilly, Chlorophytum stolzii (K. Krause) Kativu, Debesia asphodeloides (Welw. ex Baker) Kuntze		Herb		Perennial					1									Native			Z: Mt. Namuli.	Timberlake et al. (2009), FM, FZ, POWO, TPL, WFO, APD, GBIF, LMA, LMU
Angiosperms	Monocots	Asparagaceae Juss.	Chlorophytum	Species	Chlorophytum subpetiolatum (Baker) Kativu	Acrospira curtisiae I.M.Johnst., Anthericum mendoncae Poelln., Anthericum subpetiolatum Baker		Herb	Geophyte						1	1	1					LC		Native			Z: Mt. Morrumbala, Cundine (Mopeia). S: Chamba (Búzi), Dondo à Muanza. MC: Serra Mocuta, Mt. Belas (Chimoio), Serra Garuso.	FM, FZ, POWO, IUCN Red List, TPL, WFO, APD, JSTOR, GBIF, LMA, LMU
Angiosperms	Monocots	Asparagaceae Juss.	Chlorophytum	Species	Chlorophytum transvaalense (Baker) Kativu	Anthericum indutum Poelln., Anthericum transvaalense Baker, Anthericum vestitum Schinz		Herb		Perennial										1				Native			MP: Mt. M'Ponduine.	FM, FZ, POWO, TPL, WFO, APD, GBIF, LMA, LMU
Angiosperms	Monocots	Asparagaceae Juss.	Chlorophytum	Species	Chlorophytum vestitum Baker	Chlorophytum pilosissimum Engl. & K.Krause		Herb	Geophyte								1							Native			S: Chupanga (Marromeu).	FM, FZ, POWO, TPL, WFO, APD, GBIF, LMA, LMU
Angiosperms	Monocots	Asparagaceae Juss.	Chlorophytum	Species	Chlorophytum zingiberastrum Nordal & A.D.Poulsen			Herb	Geophyte			1												Native			NI: Marrupa à Mukwajaja.	FM, FZ, POWO, TPL, WFO, APD, GBIF, LMA, LMU
Angiosperms	Monocots	Asparagaceae Juss.	Cordyline	Species	Cordyline fruticosa (L.) A.Chev.	Aletris chinensis Lam., Calodracon heliconiifolia (Otto & A.Dietr.) Planch., Calodracon nobilis Planch., Calodracon sieberi (Kunth) Planch., Calodracon terminalis (L.) Planch., Convallaria fruticosa L., Cordyline amabilis Cogn. & Marchal, Cordyline baptistii Cogn. & Marchal, Cordyline cheesemanii Kirk, Cordyline dennisonii André, Cordyline densicoma Linden & André, Cordyline eschscholziana Mart. …		Shrub												1				Introduced			MP: Jardim Botânico Tunduru.	FM, FZ, POWO, TPL, WFO, APD, GBIF, LMA, LMU
Angiosperms	Monocots	Asparagaceae Juss.	Dipcadi	Species	Dipcadi brevifolium (Thunb.) Fourc.	Baeoterpe brevifolia (Thunb.) Salisb., Dipcadi hyacinthoides (P.J.Bergius ex Schltdl.) Baker, Dipcadi spirale Baker, Hyacinthus brevifolius Thunb., Hyacinthus gawleri (Kunth) Baker, Lachenalia graminifolia Sol. ex Baker, Ornithogalum hyacinthoides (P.J.Bergius ex Schltdl.) J.C.Manning & Goldblatt, Periboea brevifolia (Thunb.) Kunth, Periboea gawleri Kunth, Polemannia hyacinthoides P.J.Bergius ex …		Herb	Geophyte										1					Native			I: Vilanculos.	FM, FZ, POWO, TPL, WFO, APD, GBIF, LMA, LMU
Angiosperms	Monocots	Asparagaceae Juss.	Dipcadi	Species	Dipcadi longifolium (Lindl.) Baker	Dipcadi anthericoides Engl. & Gilg, Dipcadi firmifolium Baker, Dipcadi sansibaricum Engl., Dipcadi venenatum Schinz, Dipcadi zambesiacum Baker, Ornithogalum longifolium (Lindl.) J.C.Manning & Goldblatt, Uropetalon longifolium Lindl.		Herb	Geophyte		1			1	1					1				Native	Enequeneque (NP)		CD: Pemba, Quiterajo. T: Ulónguè. Z: Mopeia à Quelimane, Entre Mambucha e Vicente (Delta do Zambez). MP: Costa do Sol, Ponta do Ouro, Ponta do Mar.	FM, FZ, POWO, TPL, WFO, APD, GBIF, LMA, LMU, Koning (1993), K
Angiosperms	Monocots	Asparagaceae Juss.	Dipcadi	Species	Dipcadi marlothii Engl.			Herb	Geophyte							1								Native			MC: Manica.	POWO, K
Angiosperms	Monocots	Asparagaceae Juss.	Dipcadi	Species	Dipcadi viride (L.) Moench	Albuca hyacinthoides Chiov. ex Chiarugi, Dipcadi arenarium Baker, Dipcadi bussei Dammer, Dipcadi cinnabarinum Suess., Dipcadi comosum Welw. ex Baker, Dipcadi conrathii Baker, Dipcadi elatum Baker, Dipcadi erlangeri Dammer, Dipcadi filamentosum Medik., Dipcadi filifolium Baker, Dipcadi geniculatum Dinter ex Suess., Dipcadi glaucescens Engl. & K.Krause, Dipcadi helenae Beauverd, Dipcadi hockii De W…		Herb	Geophyte									1		1				Native	Ligonhua (G); Sungunha (G)		G: Xai-Xai (Hospital de Tavene). MP: Ilha de Inhaca, Ponta Malongane, Umbelúzi, Boane, Marracuene, Benfica, Ponta vermelha, Jardim Botânico Tunduru.	FM, FZ, POWO, TPL, WFO, APD, GBIF, LMA, LMU, Koning (1993), K
Angiosperms	Monocots	Asparagaceae Juss.	Dracaena	Species	Dracaena aethiopica (Thunb.) Byng & Christenh.	Sansevieria aethiopica Thunb., Sansevieria caespitosa Dinter, Sansevieria glauca Haw., Sansevieria scabrifolia Dinter, Sansevieria thunbergii Mattei		Herb	Geophyte						1									Native			Z: Zambézia.	FM, FZ, POWO, TPL, WFO, APD, GBIF, LMA, LMU
Angiosperms	Monocots	Asparagaceae Juss.	Dracaena	Species	Dracaena aletriformis (Haw.) Bos	Dracaena latifolia Regel, Draco hookeriana Kuntze, Pleomele hookeriana (Kuntze) N.E.Br., Yucca aletriformis Haw.		Tree										1		1		LC		Native			G: Floresta Sagrada de Chirindzene. MP: Jardim Botânico do IIAM, Mt. M'Ponduine.	FM, FZ, POWO, IUCN Red List, TPL, WFO, APD, JSTOR, GBIF, LMA, LMU, Burrows et al. (2018)
Angiosperms	Monocots	Asparagaceae Juss.	Dracaena	Species	Dracaena canaliculata (Carrière) Byng & Christenh.	Sansevieria canaliculata Carrière, Sansevieria schimperi Baker, Sansevieria sulcata Bojer ex Baker		Herb		Perennial	1	1												Native			CD: Murrébuè, Nhica do Rovuma, Quiterajo. NI: Marrupa (Rio Lugenda).	FZ, POWO, TPL, WFO, APD, GBIF, LMA, LMU, K
Angiosperms	Monocots	Asparagaceae Juss.	Dracaena	Species	Dracaena conspicua (N.E.Br.) Byng & Christenh.	Acyntha conspicua (N.E.Br.) Chiov., Sansevieria conspicua N.E.Br.		Herb	Succulent	Perennial										1				Native			MP: Inhaca, Batelão do rio Maputo à Zitundo, Entre Marracuene e Bobole, Salamanga (margem direita do rio Fúti).	FM, FZ, POWO, TPL, WFO, APD, GBIF, LMA, LMU
Angiosperms	Monocots	Asparagaceae Juss.	Dracaena	Species	Dracaena downsii (Chahin.) Byng & Christenh.	Sansevieria downsii Chahin.		Herb		Perennial	1													Native			CD: Montepuez	FM, TPL, WFO, POWO
Angiosperms	Monocots	Asparagaceae Juss.	Dracaena	Species	Dracaena fragrans Ker Gawl.	Aletris fragrans L., Cordyline fragrans (L.) Planch., Dracaena albanensis Sander ex Mast., Dracaena aureolus W.Bull ex Mast., Dracaena broomfieldii Sander ex Mast., Dracaena broomfieldii var. superba Sander ex Mast., Dracaena butayei De Wild., Dracaena deisteliana Engl., Dracaena deremensis Engl., Dracaena deremensis var. warneckei Engl., Dracaena ensifolia var. greigii Regel, Dracaena fragrans v…		Shrub							1	1	1			1		LC		Native			Z: Serra Chiperone, Mt. Mabu. S: Serra Gorongosa (Mt. Nhandore). MC: Mt. Espungabera. MP: IIAM-Sede (Próx. do edifíco da Botânica), Jardim Botânico Tunduru.	Müller et al. (2012), Timberlake et al. (2009), FM, FZ, POWO, IUCN Red List, TPL, WFO, APD, JSTOR, GBIF, LMA, LMU, Burrows et al. (2018)
Angiosperms	Monocots	Asparagaceae Juss.	Dracaena	Species	Dracaena hallii (Chahin.) Byng & Christenh.	Sansevieria hallii Chahin.		Herb		Perennial				1										Native			T: Desfiladeiro de Lupata.	GBIF, FM, TPL, WFO, POWO
Angiosperms	Monocots	Asparagaceae Juss.	Dracaena	Species	Dracaena hyacinthoides (L.) Mabb.	Acyntha guineensis (L.) Medik., Acyntha thyrsiflora (Thunb.) Kuntze, Cordyline guineensis (L.) Britton, Cordyline hyacinthoides (L.) W.Wight, Pleomele aloifolia Salisb., Salmia guineensis (L.) Cav., Salmia spicata Cav., Sanseverinia thyrsiflora Petagna, Sansevieria angustiflora Lindb., Sansevieria angustifolia Baker, Sansevieria ceylonica Oken, Sansevieria fulvocincta Haw., Sansevieria grandis Ho…		Herb	Geophyte		1							1	1	1				Native	Xixangua-Chanova (MP)	Medicine	CD: Palma. I: Vilanculos. G: LNP (Zona Tampão), Xa-Xai (próximo de Chongoene). MP: Entre Matola e o Umbelúzi, Boane à Porto Henrique, Moamba, Ungubana.	FM, FZ, POWO, TPL, WFO, APD, GBIF, LMA, LMU, Koning (1993), Bruschi et al. (2011), K
Angiosperms	Monocots	Asparagaceae Juss.	Dracaena	Species	Dracaena laxissima Engl.	Dracaena elegans Hua, Pleomele elegans (Hua) N.E.Br.		Shrub							1									Native		Beliefs	Z: Serra Chiperone, Mt. Mabu, Mt. Namuli.	Timberlake et al. (2007), Timberlake et al. (2009), FZ, POWO, TPL, WFO, APD, GBIF, LMA, LMU
Angiosperms	Monocots	Asparagaceae Juss.	Dracaena	Species	Dracaena longiflora (Sims) Byng & Christenh.	Acyntha longiflora (Sims) Kuntze, Sansevieria longiflora Sims		Herb		Perennial				1		1	1							Native	Khondje-La-Gomu (T,seng)		T: Ulónguè (rio Capambadzi).	GBIF, FM, TPL, WFO, POWO, Koning (1993), LMA
Angiosperms	Monocots	Asparagaceae Juss.	Dracaena	Species	Dracaena mannii Baker	Dracaena gazensis Rendle, Dracaena nitens Welw. ex Baker, Dracaena perrottetii Baker, Dracaena perrottetii var. minor Baker, Dracaena pseudoreflexa Mildbr., Dracaena reflexa var. nitens (Welw. ex Baker) Baker, Dracaena thomsoniana Veitch ex Mast. & Moore, Dracaena usambarensis Engl., Draco mannii (Baker) Kuntze, Draco perottetii (Baker) Kuntze, Pleomele gazensis (Rendle) N.E.Br., Pleomele heudelo…		Shrub			1	1	1		1	1	1	1	1	1		LC		Native	Duca (MC,sho); Mucatacata (Z); Nhamusucuro (MC); Tchilaguida (CD); Tchilanguida (CD); Thebo (Z)	Medicine	CD: Mueda à Mocímboa do Rovuma, (próximo da Missão de São Paulo de Mahate), Mt. Ancuabe. NI: Serra Mecula, N'gauma (próximo da Missão Católica de Massangulo), Litunde, Serra Sanga. NP: Serra Chinga, Angoche-Liúpo, Rio Monapo, Namapa à Nacarôa (Mt. Muchamapa). Z: Mutange, Mt. Morrumbala, Namagoa, Entre Campo e Nicoadala, Entre Gúruè e Ile, Entre Nicoadala e Marral, Luabo (margens do rio Zambeze), …	Müller et al. (2012), Timberlake et al. (2009), FM, FZ, POWO, IUCN Red List, TPL, WFO, APD, JSTOR, GBIF, LMA, LMU, Koning (1993), BNRH, Burrows et al. (2018), K
Angiosperms	Monocots	Asparagaceae Juss.	Dracaena	Species	Dracaena pearsonii (N.E.Br.) Byng & Christenh.	Sansevieria deserti N.E.Br., Sansevieria pearsonii N.E.Br., Sansevieria rhodesiana N.E.Br.		Herb		Perennial			1	1	1	1		1	1	1				Native	Caji (MP)		NP: Mt. Mepálue. T: Entre Bene e Furancungo. Z: Serra Gilé. MC: Matarara do Lucite. I: Funhalouro, Entre Mocodoene e Funhalouro (floresta de Xilaule), Mambone. G: LNP. MP: Mavalane, REM.	GBIF, FM, TPL, WFO, POWO, Koning (1993)
Angiosperms	Monocots	Asparagaceae Juss.	Dracaena	Species	Dracaena pedicellata (la Croix) Byng & Christenh.	Sansevieria pedicellata la Croix		Herb	Succulent	Perennial						1			1	1	NE	LC		Native			MC: Mts Chimanimani (Mussapa Grande), Mt. Zembe, Mt. Gurungue, Mt. Guro, Próximo de Chimoio, Mt. Muruwere. I: Chimane. MP: I. Inhaca.	FM, FZ, POWO, Wursten et al. (2017), TPL, WFO, APD, GBIF, LMA, LMU, Darbyshire et al. (2019), K
Angiosperms	Monocots	Asparagaceae Juss.	Dracaena	Species	Dracaena pethera Byng & Christenh.	Dracaena pethera var. pulchra (N.E.Br.) Byng & Christenh., Sansevieria kirkii Baker, Sansevieria kirkii var. pulchra N.E.Br.		Herb		Perennial	1			1										Native			CD: Quissanga. T: Cahora Bassa.	GBIF, FM, TPL, WFO, POWO
Angiosperms	Monocots	Asparagaceae Juss.	Dracaena	Species	Dracaena reflexa Lam.	Cordyline reflexa (Lam.) Endl., Draco reflexa (Lam.) Kuntze, Pleomele reflexa (Lam.) N.E.Br., Lomatophyllum reflexum (Lam.) Bojer		Tree			1											LC		Native			CD: Mt. Ancuabe, Mueda, Namatuca, QNP (Taratibu Bush Camp), Mecúfi.	FM, FZ, POWO, IUCN Red List, TPL, WFO, APD, JSTOR, GBIF, LMA, LMU, BNRH, Burrows et al. (2018), K
Angiosperms	Monocots	Asparagaceae Juss.	Dracaena	Species	Dracaena spathulata Byng & Christenh.	Sansevieria concinna N.E.Br., Sansevieria subspicata var. concinna (N.E.Br.) Mbugua		Herb		Perennial							1		1	1				Native	Xikwenga Xa Nhova (X,rong); Xikwenga Xa Kwati (X,tson)	Handicraft, Medicine	S: Na Floresta de Khodzue, Beira, Macúti, Cheringoma (Desfiladeiro de Codzo; Desfiladeiro do Rio Mazamba; Concessão de madeira Swanepoel). I: Pomene (6 km do hotel, cerca de 1 km do airporto). MP: I. Inhaca, Cidade de Maputo, Namaacha, REM.	GBIF, FM, Koning (1993), TPL, WFO, POWO, BNRH
Angiosperms	Monocots	Asparagaceae Juss.	Dracaena	Species	Dracaena steudneri Engl.	Dracaena papahu Engl., Pleomele papahu (Engl.) N.E.Br., Pleomele steudneri (Engl.) N.E.Br.		Tree						1	1	1						LC		Native			T: Serra Domué, Mt. Zóbuè. Z: Serra Morrumbala, Gúruè. MC: Floresta de Moribne, Estrada ao Mt. Tsetsera, CNR.	FM, FZ, POWO, IUCN Red List, TPL, WFO, APD, JSTOR, GBIF, LMA, LMU, BNRH, Burrows et al. (2018)
Angiosperms	Monocots	Asparagaceae Juss.	Dracaena	Species	Dracaena stuckyi (God.-Leb.) Byng & Christenh.	Acyntha stuckyi (God.-Leb.) Chiov., Sansevieria andradae God.-Leb., Sansevieria stuckyi God.-Leb.		Herb		Perennial					1									Native			Z: Boror.	GBIF, FM, TPL, WFO, POWO
Angiosperms	Monocots	Asparagaceae Juss.	Dracaena	Species	Dracaena subspicata (Baker) Byng & Christenh.	Sansevieria subspicata Baker		Herb	Succulent	Perennial			1		1		1		1	1	E			Native			NP: Quinga. Z: Floresta de Gobene. S: Cheringoma (Entre o Lago Urema e Inhaminga), Dondo, Desfiladeiro de Muanza (GNP). I: Pomene. MP: Ilha de Inhaca, Ilha dos Portugueses, Marracuene, Margem do Rio Matola.	FM, FZ, POWO, TPL, WFO, APD, GBIF, LMA, LMU, Darbyshire et al. (2019), BNRH, K
Angiosperms	Monocots	Asparagaceae Juss.	Dracaena	Species	Dracaena zebra Byng & Christenh.	Acyntha metallica (Gérôme & Labroy) Chiov., Dracaena zebra var. nyasica (N.E.Br.) Byng & Christenh., Sansevieria metallica Gérôme & Labroy, Sansevieria metallica var. nyasica N.E.Br.		Herb		Perennial	1						1							Native			CD: Quissanga, Palma. S: GNP, Chiramba à Chigogo.	GBIF, FM, TPL, WFO, POWO
Angiosperms	Monocots	Asparagaceae Juss.	Drimia	Species	Drimia altissima (L.f.) Ker Gawl.	Drimia barteri Baker, Drimia paolii Chiov., Drimia uitenhagensis Eckl., Idothea altissima (L.f.) Kuntze, Idothea barteri (Baker) Kuntze, Ornithogalum altissimum L.f., Ornithogalum giganteum Jacq., Scilla micrantha A.Rich., Urginavia altissima (L.f.) Speta, Urginavia epigea (R.A.Dyer) Speta, Urginavia micrantha (A.Rich.) Speta, Urginea altissima (L.f.) Baker, Urginea brevipes Baker, Urginea epigea…		Herb	Geophyte				1	1	1	1	1			1				Native			NP: Mutuáli, Namapa à Nacarôa. T: Cahora Bassa, Serra Domué. Z: Serra Chiperone, Entre Mocubela e Maganja da Costa. S: GNP (En1 à Entrada Principal, Bunga Camp), Búzi (Grudja). MC: CNR (Nhabawa Camp). MP: Mapulanguene.	Timberlake et al. (2009), FM, FZ, POWO, TPL, WFO, APD, GBIF, LMA, LMU, K
Angiosperms	Monocots	Asparagaceae Juss.	Drimia	Species	Drimia calcarata (Bak.) Stedje	Drimia modesta (Baker) Jessop, Fusifilum gracile (A.V.Duthie) Speta, Ornithogalum calcaratum Baker, Urginea arenosa Adamson, Urginea calcarata (Baker) Hilliard & B.L.Burtt, Urginea gracilis A.V.Duthie, Urginea mandalensis Baker, Urginea modesta Baker, Urginea natalensis Baker, Urginea nyasae Rendle, Urginea pedunculata Adamson, Urginea pretoriensis Baker, Urginea riparia Baker, Urginea rubella Ba…		Herb	Geophyte						1	1	1							Native			Z: Mt. Namuli. S: Serra Gorongosa (Sela entre os vales de Vanduzi e Nhandar). MC: Sussundenga.	Timberlake et al. (2009), FM, FZ, POWO, TPL, WFO, APD, GBIF, LMA, LMU, K, Wursten et al. (2017)
Angiosperms	Monocots	Asparagaceae Juss.	Drimia	Species	Drimia delagoensis (Baker) Jessop	Sekanama delagoensis (Baker) Speta, Urginea delagoensis Baker, Urginea lydenburgensis R.A.Dyer		Herb	Geophyte											1				Native			MP: Entre Boane e Goba.	FM, FZ, POWO, TPL, WFO, APD, GBIF, LMA, LMU
Angiosperms	Monocots	Asparagaceae Juss.	Drimia	Species	Drimia elata Jacq.	Drimia alta R.A.Dyer, Drimia burchellii Baker, Drimia ciliaris Jacq. ex Willd., Drimia concolor Baker, Drimia elgonica Bullock, Drimia purpurascens J.Jacq., Drimia rigidifolia Baker, Drimia robusta Baker, Drimia rudatisii Schltr., Drimia villosa Lindl., Drimia zombensis Baker, Hyacinthus ciliaris (Jacq. ex Willd.) Poir., Hyacinthus elatus (Jacq.) Poir., Idothea burchellii (Baker) Kuntze, Idothea …		Herb	Geophyte							1	1			1				Native			S: Serra Gorongosa (Mt. Nhandore). MC: Mts Chimanimani (Entre os rios Mucandue e Mutandani, Mt. Shangani). MP: Manhiça (Vale do R. Incomáti), Entre Umbelúzi e Boane.	Müller et al. (2012), FM, FZ, POWO, TPL, WFO, APD, GBIF, LMA, LMU, K, Wursten et al. (2017)
Angiosperms	Monocots	Asparagaceae Juss.	Drimia	Species	Drimia indica (Roxb.) Jessop	Albuca reflexa K.Krause & Dinter, Aletris littoralis J.Koenig ex Steud., Anthericum hyacinthoides Willd. ex Kunth, Drimia zambesiaca (Baker) J.C.Manning & Goldblatt, Erythronium hyacinthoides Royle, Erythronium indicum Rottler ex Spreng., Indurgia govindappae (A.Boraiah & Fathima) Speta, Indurgia indica (Roxb.) Speta, Indurgia wightiana (Hook.f.) Speta, Ledebouria maculata Dalzell, Melanthium hya…		Herb	Geophyte			1												Native			NI: REN (Junto ao rio Lugenda, Centro Ambiental do Mariri).	FM, FZ, POWO, TPL, WFO, APD, GBIF, LMA, LMU
Angiosperms	Monocots	Asparagaceae Juss.	Drimia	Species	Drimia intricata (Baker) J.C.Manning & Goldblatt	Anthericum intricatum Baker, Schizobasis intricata (Baker) Baker		Herb	Geophyte		1		1			1								Native			CD: QNP. NP: Serra Ribáuè. MC: Manica.	FM, FZ, POWO, TPL, WFO, APD, GBIF, LMA, LMU, K
Angiosperms	Monocots	Asparagaceae Juss.	Drimia	Species	Drimia laxiflora Baker	Idothea laxiflora (Baker) Kuntze		Herb	Geophyte						1									Native			Z: Quelimane.	FM, FZ, POWO, TPL, WFO, APD, GBIF, LMA, LMU
Angiosperms	Monocots	Asparagaceae Juss.	Drimia	Species	Drimia sanguinea (Schinz) Jessop	Sekanama burkei (Baker) Speta, Sekanama sanguinea (Schinz) Speta, Urginea burkei Baker, Urginea rautanenii Baker, Urginea sanguinea Schinz		Herb		Perennial						1		1						Native			MC: Machaze. G: Bilene.	POWO, TPL, APD, FM
Angiosperms	Monocots	Asparagaceae Juss.	Drimiopsis	Subspecies	Drimiopsis botryoides Baker subsp. botryoides	Drimiopsis bussei Dammer, Drimiopsis erlangeri Dammer, Drimiopsis holstii Engl., Drimiopsis kirkii Baker, Drimiopsis stuhlmannii Baker, Drimiopsis volkensii (Engl.) Baker, Scilla volkensii Engl.		Herb		Perennial	1																CD: Mueda.	POWO, TPL, WFO, APD, GBIF
Angiosperms	Monocots	Asparagaceae Juss.	Drimiopsis	Species	Drimiopsis burkei Baker	Ledebouria burkei (Baker) J.C.Manning & Goldblatt		Herb		Perennial	1																CD: Quiterajo (Floresta de Namacubi).	POWO, TPL, WFO, APD, GBIF, K
Angiosperms	Monocots	Asparagaceae Juss.	Drimiopsis	Species	Drimiopsis maculata Lindl. & Paxton	Drimia petiolata K.Koch & C.D.Bouché, Drimiopsis minor Baker, Ledebouria petiolata J.C.Manning & Goldblatt		Herb	Geophyte										1	1				Native			I: Vilanculos. MP: I. Inhaca, Mt. M'Ponduine, Marracuene, Costa do Sol, Avenida Marginal.	POWO, TPL, WFO, APD, GBIF, LMA
Angiosperms	Monocots	Asparagaceae Juss.	Eriospermum	Species	Eriospermum abyssinicum Baker	Anthericum flagelliforme Baker, Bulbine unifolia Schult.f. ex Baker, Eriospermum bakerianum var. seineri (Engl. & K.Krause) Poelln., Eriospermum burchellii Baker, Eriospermum elatum Baker, Eriospermum flagelliforme (Baker) J.C.Manning, Eriospermum fleckii Schinz, Eriospermum longipetiolatum Dammer, Eriospermum luteorubrum Baker, Eriospermum seineri Engl. & K.Krause, Eriospermum togoense Dammer, S…		Herb		Perennial	1			1		1								Native			T: Ulónguè. MC: Vandúzi, CNR (Ao longo do caminho para o Mt. Binga acima do Cruzamento de Nhamadzi). CD: Quiterajo.	FM, FZ, POWO, TPL, WFO, APD, GBIF, LMA, LMU, K, Wursten et al. (2017)
Angiosperms	Monocots	Asparagaceae Juss.	Eriospermum	Species	Eriospermum cecilii Baker			Herb		Perennial										1		LC	Requiring to add Mozambique in the geographic range	Native			MP: Namaacha.	FM, FZ, POWO, IUCN Red List, TPL, WFO, APD, JSTOR, GBIF, LMA, LMU
Angiosperms	Monocots	Asparagaceae Juss.	Eriospermum	Species	Eriospermum kirkii Baker			Herb		Perennial	1				1		1							Native			CD: QNP. Z: Entre Mocuba e Mugeba, Chimuara (Vale do R. Zambeze), Namagoa, Entre Desfiladeiro de Lupata e Sena (no baixo rio Zambeze). S: Chupanga.	FM, FZ, POWO, TPL, WFO, APD, GBIF, LMA, LMU
Angiosperms	Monocots	Asparagaceae Juss.	Eriospermum	Subspecies	Eriospermum mackenii (Hook.f.) Baker subsp. galpinii (Schinz) P.L.Perry	Eriospermum convallariifolium Dinter, Eriospermum galpinii Schinz, Eriospermum omahekense Engl. & K.Krause, Eriospermum pilosopetiolatum Dinter, Eriospermum reflexum Schinz, Eriospermum subpilosum Poelln.		Herb	Geophyte											1				Native			MP: Namaacha.	FM, FZ, POWO, TPL, WFO, APD, GBIF, LMA, LMU
Angiosperms	Monocots	Asparagaceae Juss.	Eriospermum	Subspecies	Eriospermum mackenii (Hook.f.) Baker subsp. mackenii	Anthericum unyamweziense Poelln., Bulbine platyphylla Baker, Eriospermum homblei De Wild. & Ledoux, Eriospermum junodii Baker, Eriospermum transvaalense Poelln., Eriospermum veratriforme Peter ex Poelln.		Herb		Perennial							1							Native			S: Serra Garuso.	FM, POWO, APD, JSTOR, GBIF
Angiosperms	Monocots	Asparagaceae Juss.	Eriospermum	Subspecies	Eriospermum mackenii (Hook.f.) Baker subsp. phippsii (Wild) P.L.Perry	Eriospermum phippsii Wild		Herb	Geophyte							1					NE			Native			MC: Mts Chimanimani (Colinas a oeste do Rio Mevumodzi).	FM, FZ, POWO, TPL, WFO, APD, GBIF, LMA, LMU, Darbyshire et al. (2019), K, Wursten et al. (2017)
Angiosperms	Monocots	Asparagaceae Juss.	Eriospermum	Species	Eriospermum triphyllum Baker	Eriospermum heterophyllum Cufod., Eriospermum linearifolium Baker		Herb		Perennial						1	1			1				Native			S: Búzi. MC: Chimoio (Pedreira de Belas), Serra Garuso, 10 milhas a norte de Mavita. MP: Goba (proximidades do rio Maiuna).	FM, FZ, POWO, TPL, WFO, APD, GBIF, LMA, LMU
Angiosperms	Monocots	Asparagaceae Juss.	Eucomis	Species	Eucomis autumnalis (Mill.) Chitt.	Fritillaria autumnalis Mill.		Herb		Perennial						1								Native			MC: Tsetsera.	POWO, TPL, WFO, FM, Wursten et al. (2017)
Angiosperms	Monocots	Asparagaceae Juss.	Eucomis	Species	Eucomis humilis Baker			Herb	Geophyte											1							MP: Mt. M'Ponduine.	POWO, TPL, APD, GBIF, LMU
Angiosperms	Monocots	Asparagaceae Juss.	Eucomis	Species	Eucomis zambesiaca Baker			Herb	Geophyte					1		1								Native			T: Entre Chiputo e Fíngoè. MC: Serra Mocuta.	POWO, TPL, APD, GBIF, LMA
Angiosperms	Monocots	Asparagaceae Juss.	Ledebouria	Species	Ledebouria apertiflora (Baker) Jessop	Drimia apertiflora Baker, Scilla apertiflora (Baker) C.A.Sm., Scilla linearifolia Baker, Scilla lorata Baker		Herb	Geophyte											1							MP: Namaacha, Matutuíne.	FM, POWO, TPL, APD
Angiosperms	Monocots	Asparagaceae Juss.	Ledebouria	Species	Ledebouria cordifolia (Baker) Stedje & Thulin	Eriospermum somalense Schinz, Scilla carunculifera Chiov., Scilla cordifolia Baker, Scilla glandulosa (Chiov.) Chiov. ex Chiarugi		Herb		Perennial					1									Native			Z: Milange.	FM, POWO, TPL, APD
Angiosperms	Monocots	Asparagaceae Juss.	Ledebouria	Species	Ledebouria floribunda (Baker) Jessop	Drimia pendula Burch. ex Baker, Scilla floribunda Baker, Scilla lauta N.E.Br., Scilla pendula Baker, Scilla polyantha Baker, Scilla princeps Baker, Scilla subsecunda Baker, Scilla tricolor Baker		Herb	Geophyte											1							MP: Goba (proximidades do Rio Maiuana).	POWO, TPL, APD, LMA
Angiosperms	Monocots	Asparagaceae Juss.	Ledebouria	Species	Ledebouria kirkii (Baker) Stedje & Thulin	Drimia angustitepala Engl., Drimia hildebrandtii Baker, Ledebouria hildebrandtii (Baker) U.Müll.-Doblies & D.Müll.-Doblies, Scilla johnstonii Baker ex Oliv., Scilla kirkii Baker, Urginea corradii Chiov. ex Chiarugi		Herb		Perennial						1											MC: Mt. Xirôso.	POWO, TPL, APD, GBIF
Angiosperms	Monocots	Asparagaceae Juss.	Ledebouria	Species	Ledebouria macowanii (Baker) S.Venter	Scilla macowanii Baker, Scilla nelsonii Baker		Herb	Geophyte											1				Native			MP: Moamba.	FM, FZ, POWO, TPL, WFO, APD, GBIF, LMA, LMU
Angiosperms	Monocots	Asparagaceae Juss.	Ledebouria	Species	Ledebouria maesta (Baker) Speta	Scilla maesta Baker		Herb	Geophyte						1									Native			Z: Delta do Zambeze (Cacaira).	FM, FZ, POWO, TPL, WFO, APD, GBIF, LMA, LMU
Angiosperms	Monocots	Asparagaceae Juss.	Ledebouria	Species	Ledebouria revoluta (L.f.) Jessop	Barnardia indica Wight, Drimia acuminata Lodd., Drimia bifolia (Hochst. ex A.Rich.) Schweinf., Drimia brevifolia Baker, Drimia lanceifolia (Jacq.) Ker Gawl., Drimia lanceifolia var. longipedunculata Schrad., Drimia longipedunculata Sweet, Drimia revoluta (L.f.) Sweet, Eratobotrys bifolia Hochst. ex A.Rich., Hyacinthus revolutus L.f., Hypoxis violacea Schult. & Schult.f., Lachenalia lanceifolia Ja…		Herb	Geophyte		1				1	1		1		1				Native	Lissungunha (MP)		CD: Mocímboa da Praia, Quiterajo. Z: Serra Chiperone, Namagoa. MC: Mts Chimanimani, Entre Moribane e Matarara do Lucite. G: Entre Chibuto e Alto Changane. MP: Ilha da Inhaca, Macaneta.	Timberlake et al. (2009), FM, FZ, POWO, TPL, WFO, APD, GBIF, LMA, LMU, Koning (1993), K, Wursten et al. (2017)
Angiosperms	Monocots	Asparagaceae Juss.	Ledebouria	Species	Ledebouria zambesiaca (Baker) Speta	Scilla zambesiaca Baker		Herb	Geophyte					1	1									Native			T: Lower Zambesi, near Tete.	POWO, TPL, APD, GBIF
Angiosperms	Monocots	Asparagaceae Juss.	Merwilla	Subspecies	Merwilla plumbea (Lindl.) Speta subsp. plumbea	Merwilla lazulina (Wild) Speta, Merwilla natalensis (Planch.) Speta, Scilla lazulina Wild, Scilla natalensis Planch.		Herb	Geophyte						1	1								Native		Beliefs	Z: Mt. Namuli. MC: Mts Chimanimani.	GBIF, POWO, TPL, APD, FM, Wursten et al. (2017)
Angiosperms	Monocots	Asparagaceae Juss.	Resnova	Species	Resnova humifusa (Baker) U.Müll.-Doblies & D.Müll.-Doblies	Drimiopsis humifusa (Baker) Baker, Drimiopsis maxima Baker, Drimiopsis saundersiae Baker, Ledebouria humifusa (Baker) J.C.Manning & Goldblatt, Ledebouria transvaalensis (van der Merwe) J.C.Manning & Goldblatt, Resnova schlechteri (Baker) van der Merwe, Resnova transvaalensis van der Merwe, Scilla humifusa Baker, Scilla schlechteri Baker		Herb		Perennial										1				Native			MP: Namaacha.	POWO, TPL, FM
Angiosperms	Monocots	Asparagaceae Juss.	Schizobasis	Species	Schizobasis intricata (Baker) Baker			Herb		Perennial	1					1	1							Native			CD: QNP. MC: Mts Chimanimani, Mt. Chisukuvo.	TPL, WFO, FM
Angiosperms	Monocots	Asparagaceae Juss.	Schizocarphus	Species	Schizocarphus nervosus (Burch.) van der Merwe	Drimia dregeana Kunth, Ornithogalum nervosum Burch., Schizocarphus acerosus (van der Merwe) van der Merwe, Schizocarphus gerrardii (Baker) van der Merwe, Schizocarphus hispidulus (Baker) Speta, Schizocarphus rigidifolius (Kunth) van der Merwe, Schizocarphus setifer (Baker) Speta, Scilla bakeriana Poelln., Scilla eriospermoides Engl. & Gilg, Scilla gerrardii Baker, Scilla hispidula Baker, Scilla n…		Herb	Geophyte						1	1	1			1				Native	Munhacarumbane (S)		Z: Serra Gúruè (morro Maipi). S: Beira. MC: Manic. MP: Entre Namaacha e Goba.	FM, FZ, POWO, TPL, WFO, APD, GBIF, LMA, LMU, Koning (1993), K, Wursten et al. (2017)
Angiosperms	Monocots	Asparagaceae Juss.	Scilla	Species	Scilla benguellensis Baker			Herb		Perennial								1									G: Entre Chibuto e Chaimite.	POWO, TPL, WFO, APD, GBIF
Angiosperms	Monocots	Asparagaceae Juss.	Scilla	Species	Scilla buchananii Baker			Herb		Perennial						1											MC: Serra Garuso.	GBIF
Angiosperms	Monocots	Asparagaceae Juss.	Scilla	Species	Scilla gracillima Engl.			Herb		Perennial							1							Native			S: Sena.	FM, JSTOR, POWO, TPL, WFO, APD, GBIF
Angiosperms	Monocots	Asparagaceae Juss.	Scilla	Species	Scilla petersii Engl.			Herb		Perennial							1							Native			S: Beira	FM, JSTOR, POWO, TPL, WFO, APD, GBIF
Angiosperms	Monocots	Asparagaceae Juss.	Scilla	Species	Scilla schweinfurthii Engl.			Herb		Perennial			1														NP: Ilha de Moçambique.	POWO, GBIF, TPL, APD
Angiosperms	Monocots	Asparagaceae Juss.	Scilla	Species	Scilla simiarum Baker			Herb	Geophyte										1								I: Homoíne.	POWO, GBIF, TPL, APD
Angiosperms	Monocots	Asparagaceae Juss.	Scilla	Species	Scilla tayloriana Rendle			Herb	Geophyte											1							MP: Ilha de Inhaca.	POWO, GBIF, TPL
Angiosperms	Monocots	Asparagaceae Juss.	Yucca	Species	Yucca aloifolia L.	Dracaena lenneana Regel, Sarcoyucca aloifolia (L.) Linding., Yucca aloifolia var. arcuata (Haw.) Trel., Yucca aloifolia f. arcuata (Haw.) Voss, Yucca aloifolia var. conspicua (Haw.) Engelm., Yucca aloifolia f. crenulata (Haw.) Voss, Yucca aloifolia var. draconis (L.) Engelm., Yucca aloifolia f. draconis (L.) Voss, Yucca aloifolia f. genuina Engelm., Yucca aloifolia f. menandii Trel., Yucca aloifo…		Shrub										1						Introduced			G: Maniquenique.	FM, FZ, POWO, Da Silva et al. (2004), TPL, WFO, APD, JSTOR, GBIF, LMA, LMU
Angiosperms	Monocots	Asphodelaceae Juss.	Aloe	Species	Aloe aculeata Pole-Evans			Herb		Perennial								1						Native			G: Arredores do Farol da Barra de Limpopo.	POWO, GBIF, JSTOR
Angiosperms	Monocots	Asphodelaceae Juss.	Aloe	Species	Aloe arborescens Mill.	Aloe perfoliata var. arborescens (Mill.) Aiton, Catevala arborescens (Mill.) Medik.		Shrub						1	1	1	1			1		LC		Native	Chitsete (MP,rong)		T: Songo. Z: Morrumbala, Metolola, Mt. Mabu, Serra Chiperone. S: Serra Gorongosa (Mt. Nhandore). MC: Mt. Tsetsera, Mts Chimanimani (Mt. Nhamudimu; Vale do Alto Mevumodzi). MP: Ilha de Inhaca, Mt. M'Ponduine, Costa do Sol, Jardim Botânico Tunduru.	Müller et al. (2012), Timberlake et al. (2009), FM, FZ, POWO, TPL, WFO, APD, GBIF, LMA, LMU, IUCN Red List, Koning (1993), Burrows et al. (2018), Wursten et al. (2017)
Angiosperms	Monocots	Asphodelaceae Juss.	Aloe	Species	Aloe argentifolia T.A.McCoy, Rulkens & O.J.Baptista			Shrub	Succulent		1										E	VU		Native			CD: Quedas do Rio Lúrio.	FM, FZ, POWO, TPL, WFO, APD, GBIF, LMA, LMU, Darbyshire et al. (2019), IUCN Red List, K
Angiosperms	Monocots	Asphodelaceae Juss.	Aloe	Variety	Aloe ballii Reynolds var. makurupiniensis Ellert			Herb	Succulent	Perennial						1					NE	VU		Native			MC: Mts Chimanimani (Makurupini), CNR (Mt. Magorogodo, Zomba).	FM, FZ, POWO, TPL, WFO, APD, GBIF, LMA, LMU, IUCN Red List, Darbyshire et al. (2019), K
Angiosperms	Monocots	Asphodelaceae Juss.	Aloe	Variety	Aloe cameronii Hemsl. var. cameronii			Herb		Perennial				1		1								Native			T: Cahora Bassa. MC: Chimoio, Gondola à Mt. Zembe (ao longo da estrada Chimoio-Sussundenga perto de Zembe-Gondola).	FM, FZ, POWO, TPL, WFO, APD, GBIF, LMA, LMU
Angiosperms	Monocots	Asphodelaceae Juss.	Aloe	Species	Aloe cannellii L.C. Leach			Herb	Succulent	Perennial						1					E	LC		Native			MC: Chimoio, Serra Mocuta, Mt. Pandangoma (Báruè).	FM, FZ, POWO, TPL, WFO, APD, GBIF, LMA, LMU, IUCN Red List, Darbyshire et al. (2019), K
[truncated: 6,177 more rows]

## Sheet: Abbreviations and Acronyms
Flag	Description
[truncated: 61 more rows]
